# Supplementary material
Source: MDPI journal article supplement (https://www.mdpi.com/2227-9040/11/1/52)
Supplement: s1 [file s1]

# Luminescent Metal-Organic Framework with 2,1,3-benzothiadiazole Units for Highly Sensitive Gossypol Sensing

Dmitry I. Pavlov <sup>1</sup>, Xiaolin Yu <sup>1,2</sup>, Alexey A. Ryadun <sup>1</sup>, Vladimir P. Fedin <sup>1</sup> and Andrei S. Potapov <sup>1,\*</sup>

<sup>1</sup> Nikolaev Institute of Inorganic Chemistry, Siberian Branch of the Russian Academy of Sciences, 3 Lavrentiev Avenue, 630090 Novosibirsk, Russia; pavlov@niic.nsc.ru (D.I.P.); s.yuj1@g.nsu.ru (X.Y.); ryadunalexey@mail.ru (A.A.R.); cluster@niic.nsc.ru (V.P.F.)

<sup>2</sup> Department of Natural Sciences, Novosibirsk State University, 2 Pirogov Str., 630090 Novosibirsk, Russia

\* Correspondence: potapov@niic.nsc.ru

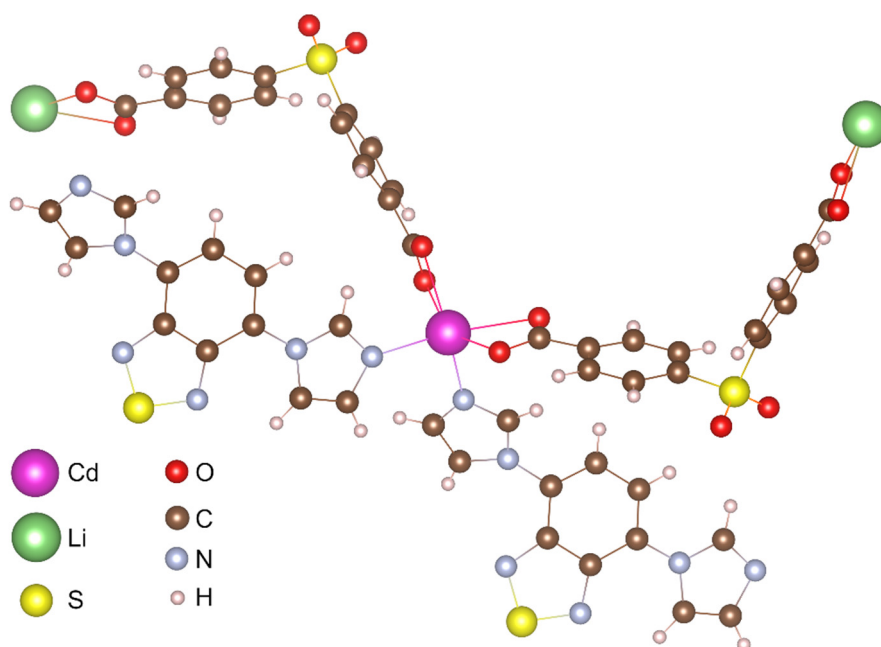

Figure S1. Model of MOF 1 fragment used for DFT calculations.

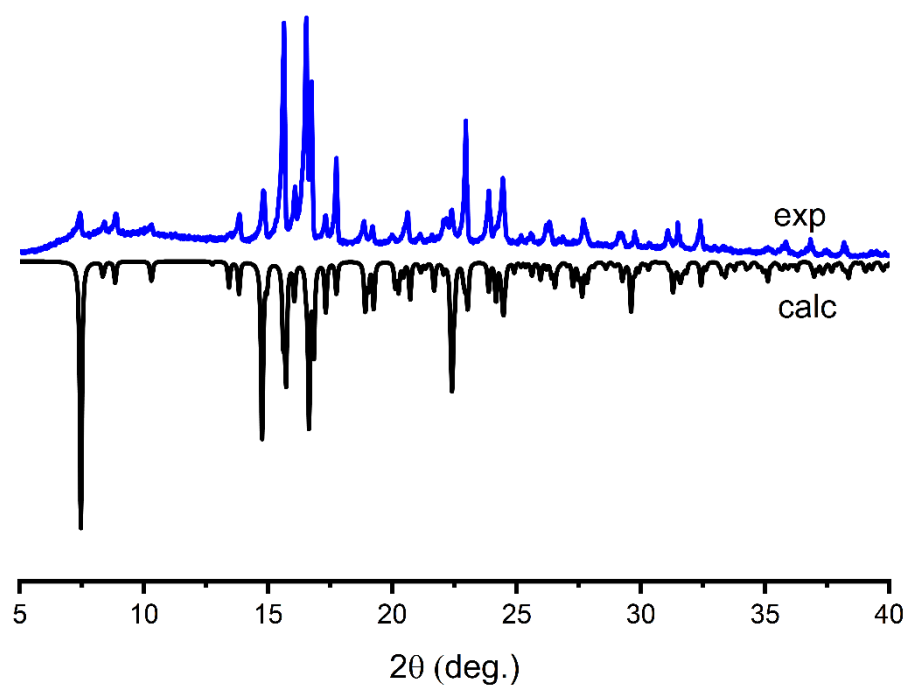

**Figure S2.** Calculated and experimental PXRd patterns of as-synthesized MOF 1.

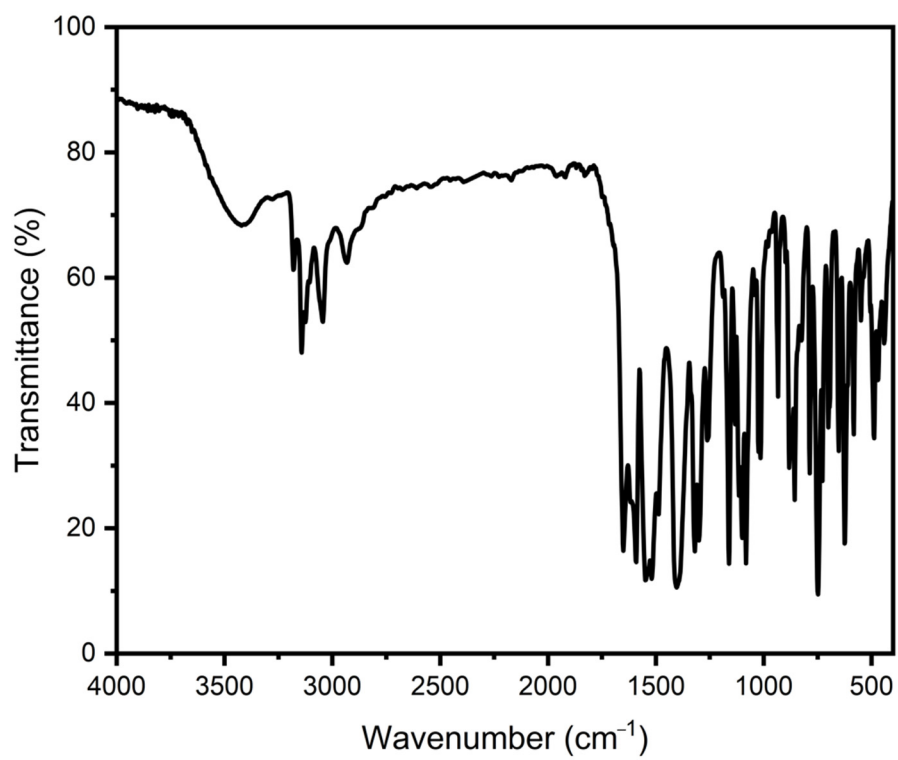

**Figure S3.** FT-IR spectrum of MOF 1.

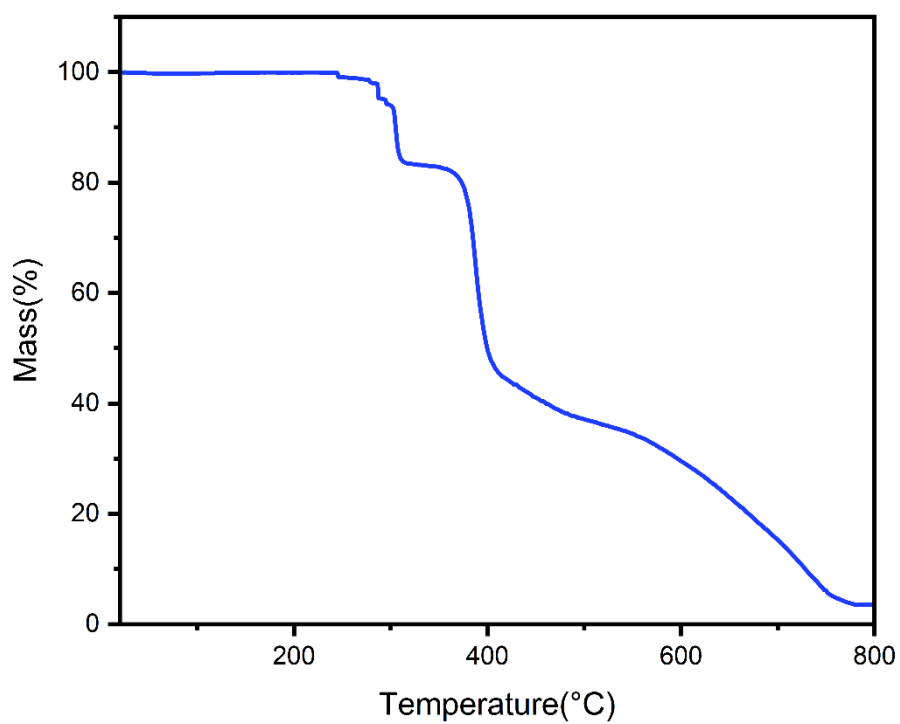

Figure S4. TGA curve of MOF 1.

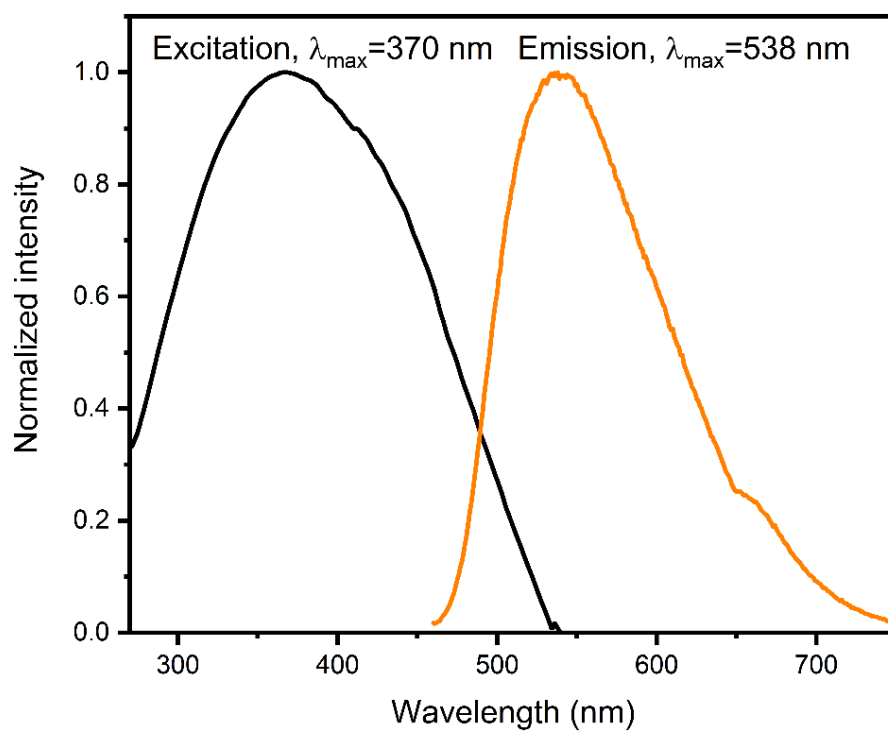

Figure S5. Solid-state photoluminescence spectra of im2btd.

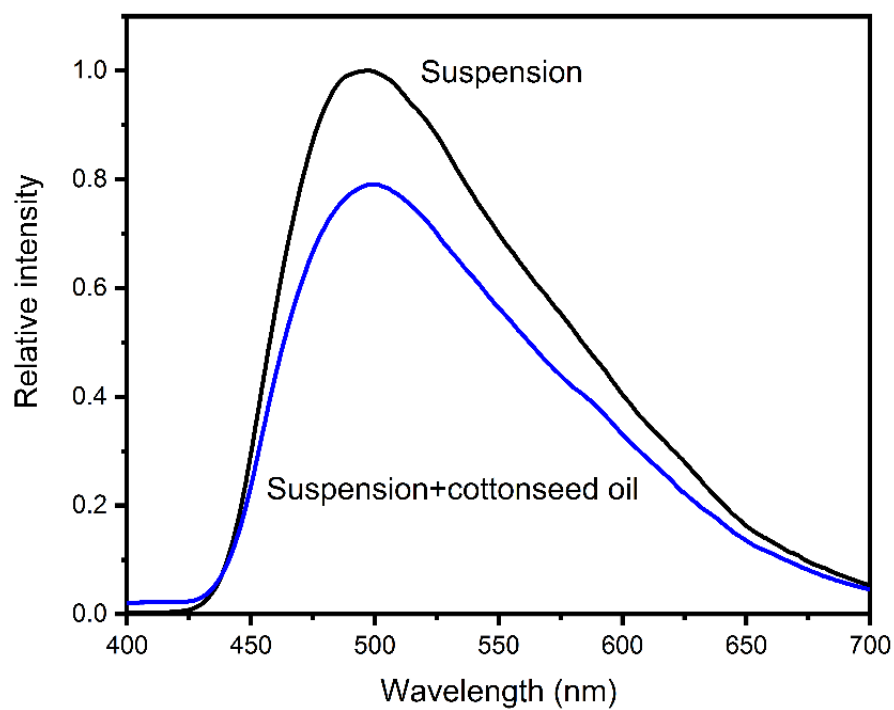

**Figure S6.** Luminescence spectra of ethanol suspension of MOF 1 with and without cottonseed oil.

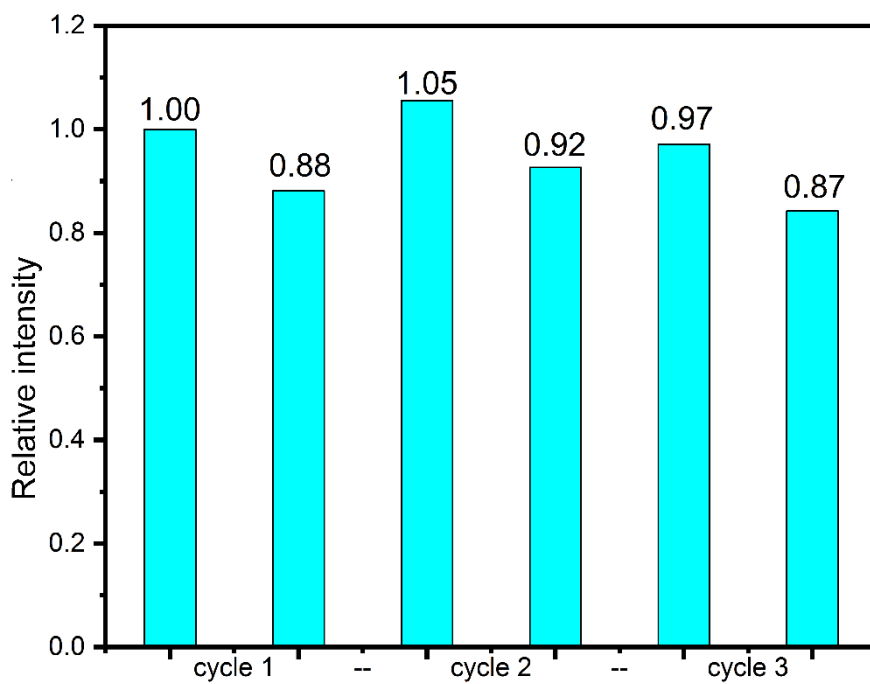

**Figure S7.** Recycling experiment of gossypol detection with MOF 1. Relative integral intensities are shown. The relative quenching values  $(I_0-I)/I$  are 0.14 (cycle 1), 0.14 (cycle 2) and 0.12 (cycle 3).

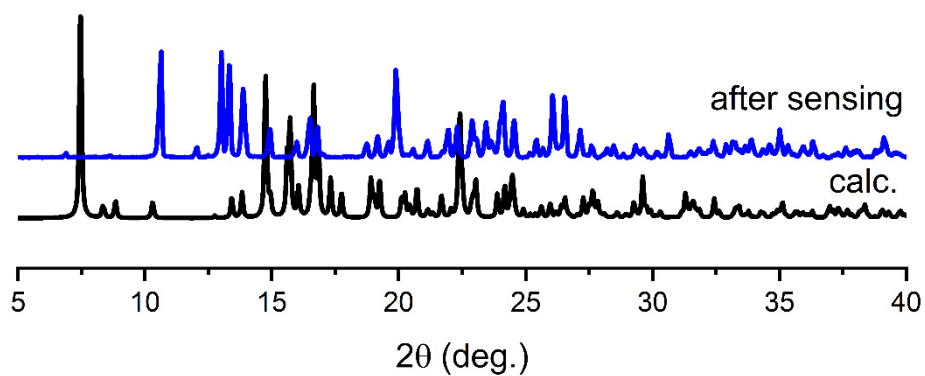

**Figure S8.** Calculated and experimental PXRD patterns for MOF **1** after the sensing experiment.

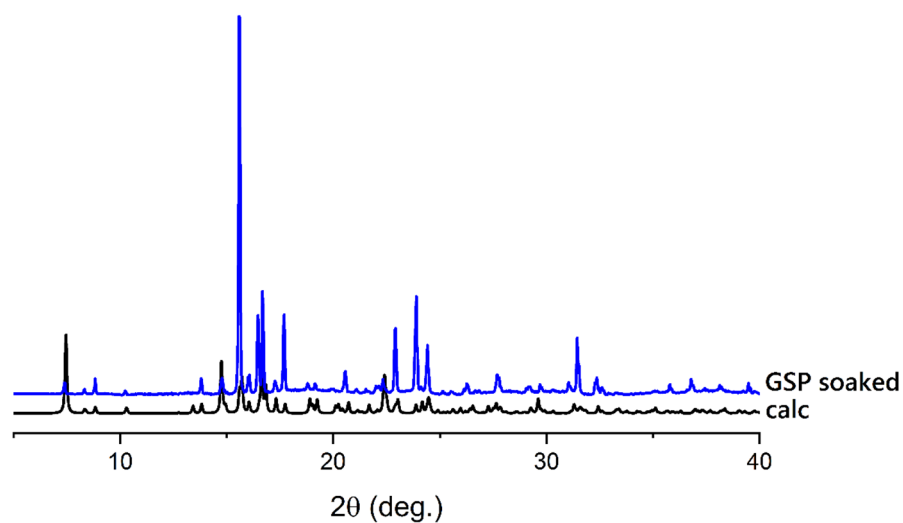

**Figure S9.** PXRD pattern of GSP-soaked MOF **1** and calculated pattern from SCXRD data.

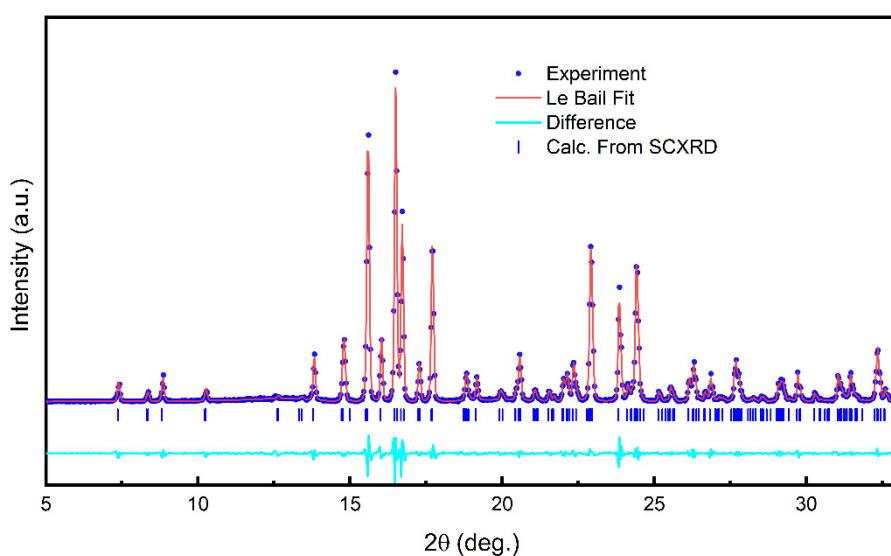

**Figure S10.** Le-Bail fitting of GSP-soaked MOF **1**. The final wR is 12.7 % and the cell parameters are mC6439.4 a 23.6106 b 11.37462 c 26.65459  $\beta=115.902$ .

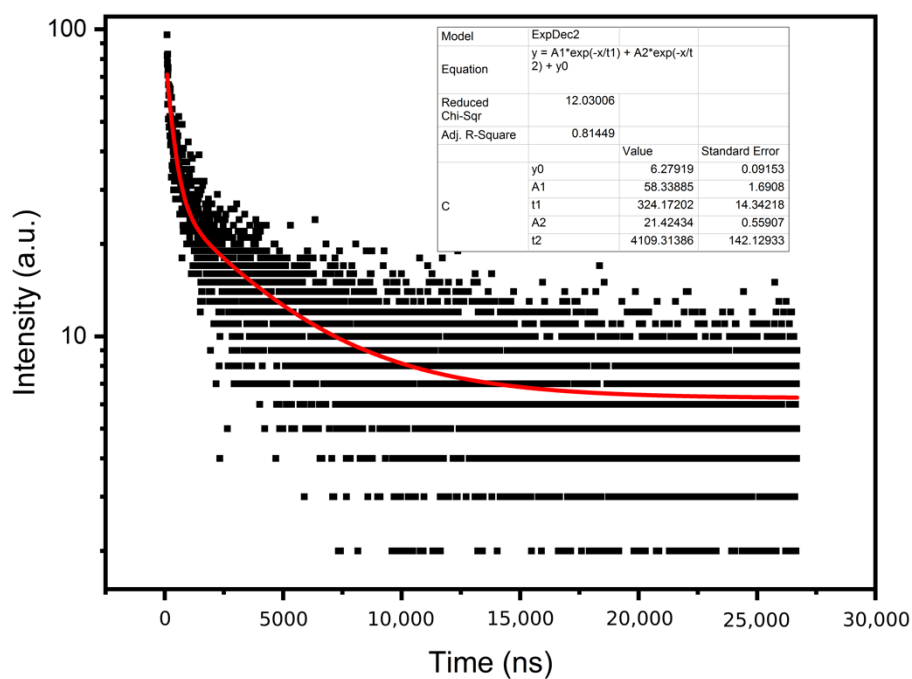

**Figure S11.** Photoluminescence decay curve for solid-state MOF 1.

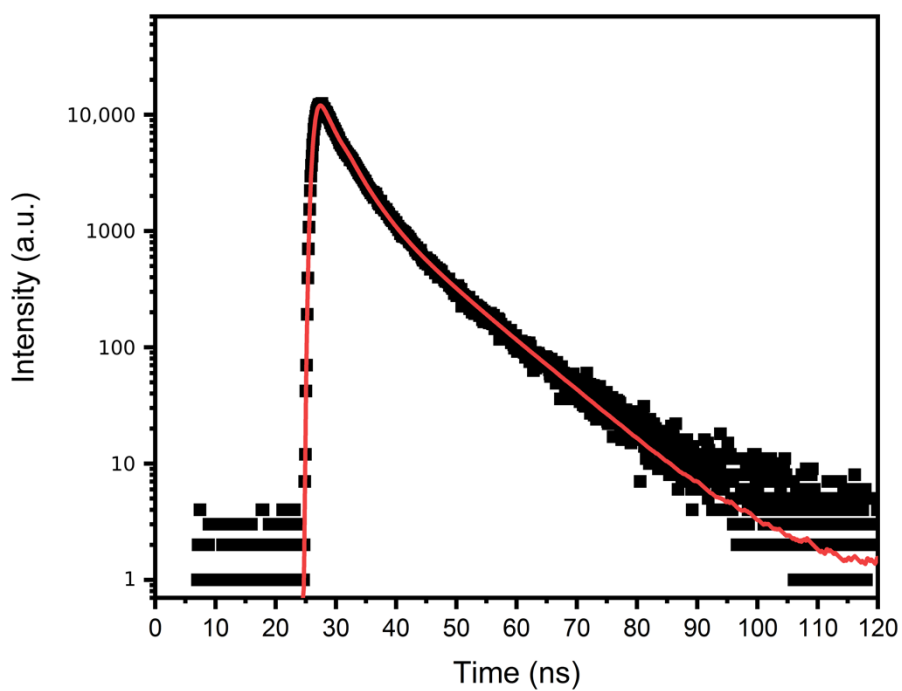

**Figure S12.** Photoluminescence decay curve for MOF 1 blank ethanol suspension.

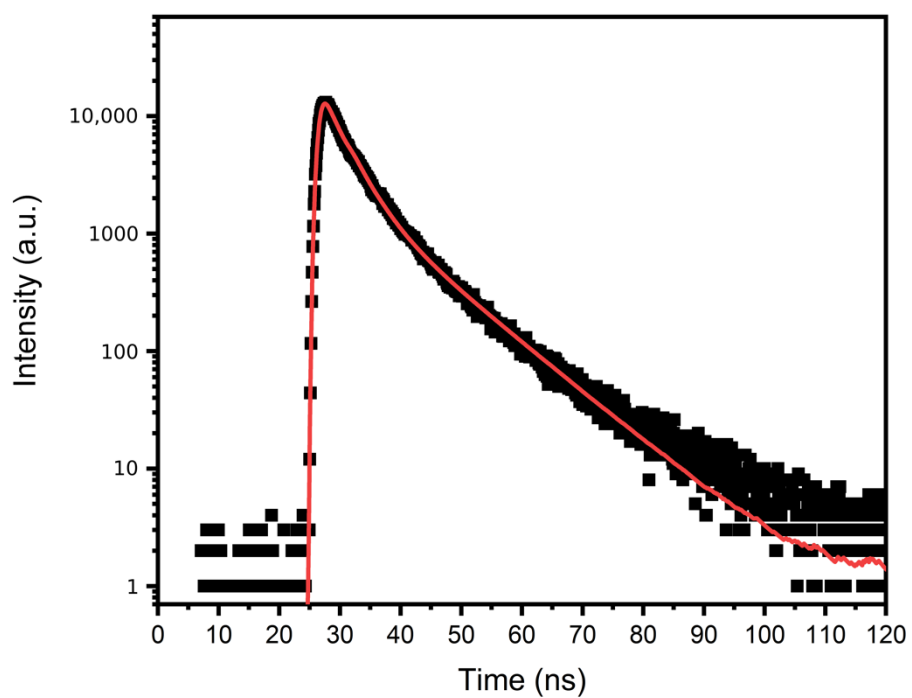

**Figure S13.** Photoluminescence decay curve for MOF 1 ethanol suspension in the presence of gossypol (C=0.01 mM).

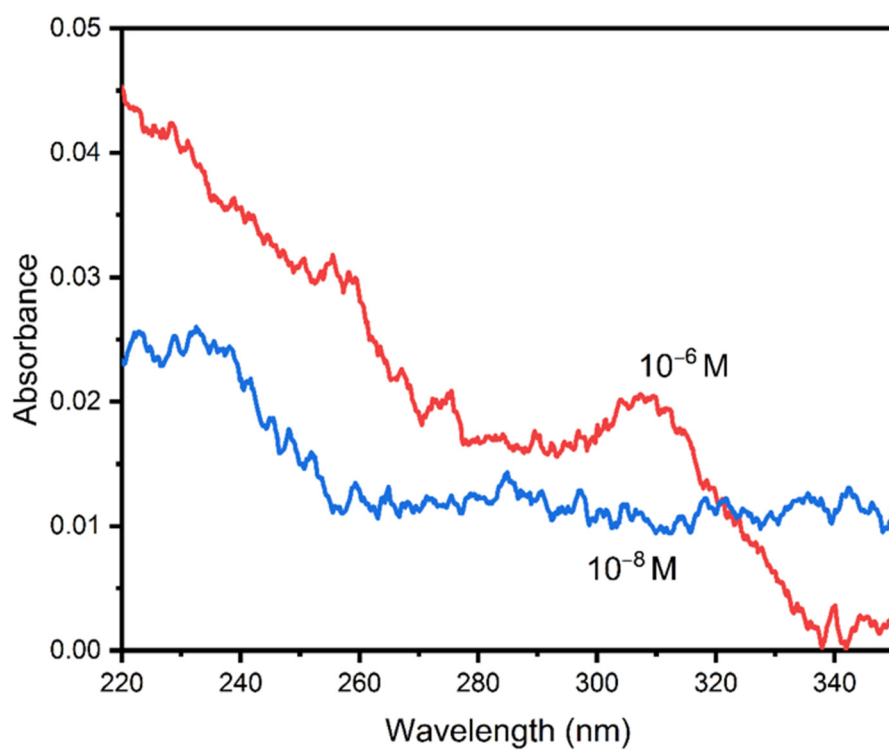

**Figure S14.** UV-Vis spectra of gossypol solutions in  $10^{-6}$  and  $10^{-8}$  M ethanol solutions.

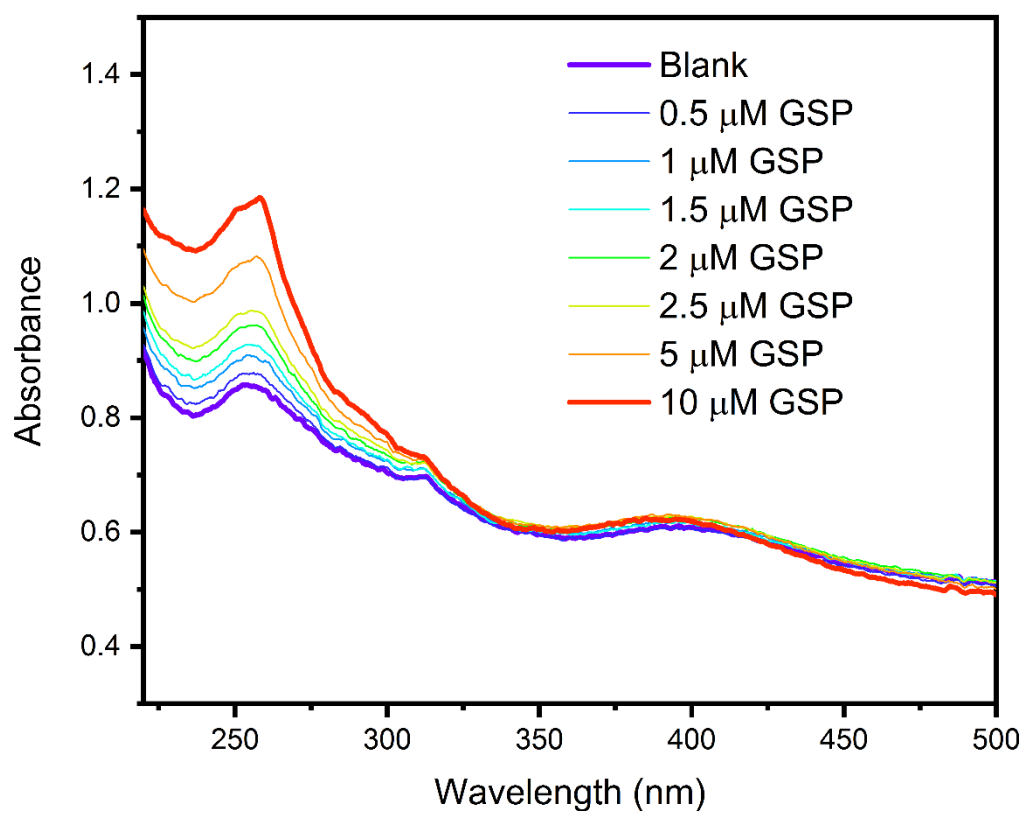

**Figure S15.** UV-Vis spectra of MOF 1 ethanol suspension upon addition of different concentrations of gossypol.
