# Supplementary material
Source: MDPI journal article supplement (https://www.mdpi.com/2227-9040/11/1/52)
Supplement: s1 [file s1]

Archive with 3 entries (3 files):
- MOF1.cif
- MOF1_checkcif.pdf
- Supplementary materials.pdf
