# Supplementary material
Source: MDPI journal article supplement (https://www.mdpi.com/2227-9040/11/1/52)
Supplement: s1 [file s1 › MOF1.cif]

 
data_pvl691_sq
 
_audit_creation_method            'SHELXL-2018/3'
_shelx_SHELXL_version_number      '2018/3'
_chemical_name_systematic         ?
_chemical_name_common             ?
_chemical_melting_point           ?
_chemical_formula_moiety          ?
_chemical_formula_sum
 'C26 H16 Cd N6 O6 S2' 
_chemical_formula_weight          684.97

loop_
 _atom_type_symbol
 _atom_type_description
 _atom_type_scat_dispersion_real
 _atom_type_scat_dispersion_imag
 _atom_type_scat_source
 'C'  'C'   0.0033   0.0016
 'International Tables Vol C Tables 4.2.6.8 and 6.1.1.4'
 'H'  'H'   0.0000   0.0000
 'International Tables Vol C Tables 4.2.6.8 and 6.1.1.4'
 'N'  'N'   0.0061   0.0033
 'International Tables Vol C Tables 4.2.6.8 and 6.1.1.4'
 'O'  'O'   0.0106   0.0060
 'International Tables Vol C Tables 4.2.6.8 and 6.1.1.4'
 'S'  'S'   0.1246   0.1234
 'International Tables Vol C Tables 4.2.6.8 and 6.1.1.4'
 'Cd'  'Cd'  -0.8075   1.2024
 'International Tables Vol C Tables 4.2.6.8 and 6.1.1.4'
 
_space_group_crystal_system       monoclinic
_space_group_IT_number            15
_space_group_name_H-M_alt         'C 2/c'
_space_group_name_Hall            '-C 2yc'
 
_shelx_space_group_comment
;
The symmetry employed for this shelxl refinement is uniquely defined
by the following loop, which should always be used as a source of
symmetry information in preference to the above space-group names.
They are only intended as comments.
;
 
loop_
 _space_group_symop_operation_xyz
 'x, y, z'
 '-x, y, -z+1/2'
 'x+1/2, y+1/2, z'
 '-x+1/2, y+1/2, -z+1/2'
 '-x, -y, -z'
 'x, -y, z-1/2'
 '-x+1/2, -y+1/2, -z'
 'x+1/2, -y+1/2, z-1/2'
 
_cell_length_a                    23.6070(7)
_cell_length_b                    11.3468(2)
_cell_length_c                    26.3689(8)
_cell_angle_alpha                 90
_cell_angle_beta                  116.055(4)
_cell_angle_gamma                 90
_cell_volume                      6345.5(4)
_cell_formula_units_Z             8
_cell_measurement_temperature   142(3) 
_cell_measurement_reflns_used   68737
_cell_measurement_theta_min     1.9550
_cell_measurement_theta_max     28.9490
 
_exptl_crystal_description        block
_exptl_crystal_colour             orange
_exptl_crystal_density_meas       ?
_exptl_crystal_density_method     ?
_exptl_crystal_density_diffrn     1.434          
_exptl_crystal_F_000              2736
_exptl_transmission_factor_min    ?
_exptl_transmission_factor_max    ?
_exptl_crystal_size_max           0.200
_exptl_crystal_size_mid           0.100
_exptl_crystal_size_min           0.100
_exptl_absorpt_coefficient_mu     0.866
_shelx_estimated_absorpt_T_min    ?
_shelx_estimated_absorpt_T_max    ?
_exptl_absorpt_correction_T_min                   0.95111
_exptl_absorpt_correction_T_max                   1.00000
_exptl_absorpt_correction_type            multi-scan
_exptl_absorpt_process_details
;
CrysAlisPro 1.171.41.104a (Rigaku Oxford Diffraction, 2021)
Empirical absorption correction using spherical harmonics,
implemented in SCALE3 ABSPACK scaling algorithm.
;
_exptl_absorpt_special_details    ?
_diffrn_ambient_temperature       142(2)
_diffrn_radiation_wavelength      0.71073
_diffrn_radiation_type            MoK\a
_diffrn_source                    ?
_diffrn_measurement_device_type   'New Xcalibur, AtlasS2'
_diffrn_measurement_method        '\w scans'
_diffrn_detector_area_resol_mean  ?
_diffrn_reflns_number             49511
_diffrn_reflns_av_unetI/netI      0.0123
_diffrn_reflns_av_R_equivalents   0.0182
_diffrn_reflns_limit_h_min        -29
_diffrn_reflns_limit_h_max        32
_diffrn_reflns_limit_k_min        -15
_diffrn_reflns_limit_k_max        14
_diffrn_reflns_limit_l_min        -35
_diffrn_reflns_limit_l_max        35
_diffrn_reflns_theta_min          2.036
_diffrn_reflns_theta_max          29.061
_diffrn_reflns_theta_full         25.242
_diffrn_measured_fraction_theta_max   0.908
_diffrn_measured_fraction_theta_full  0.999
_diffrn_reflns_Laue_measured_fraction_max    0.908
_diffrn_reflns_Laue_measured_fraction_full   0.999
_diffrn_reflns_point_group_measured_fraction_max   0.908
_diffrn_reflns_point_group_measured_fraction_full  0.999
_reflns_number_total              7697
_reflns_number_gt                 7175
_reflns_threshold_expression      'I > 2\s(I)'
_reflns_Friedel_coverage          0.000
_reflns_Friedel_fraction_max      .
_reflns_Friedel_fraction_full     .
 
_reflns_special_details
;
 Reflections were merged by SHELXL according to the crystal
 class for the calculation of statistics and refinement.
 
 Structure factors included contributions from the .fab file.
 
 _reflns_Friedel_fraction is defined as the number of unique
 Friedel pairs measured divided by the number that would be
 possible theoretically, ignoring centric projections and
 systematic absences.
;
 
_computing_data_collection        ?
_computing_cell_refinement        ?
_computing_data_reduction         ?
_computing_structure_solution     'SHELXT 2018/2 (Sheldrick, 2018)'
_computing_structure_refinement 'SHELXL-2018/3 (Sheldrick, 2018)'
_computing_molecular_graphics     ?
_computing_publication_material   ?
_refine_special_details           ?
_refine_ls_structure_factor_coef  Fsqd
_refine_ls_matrix_type            full
_refine_ls_weighting_scheme       calc
_refine_ls_weighting_details
'w=1/[\s^2^(Fo^2^)+(0.0243P)^2^+8.1796P] where P=(Fo^2^+2Fc^2^)/3'
_atom_sites_solution_primary      ?
_atom_sites_solution_secondary    ?
_atom_sites_solution_hydrogens    geom
_refine_ls_hydrogen_treatment     constr
_refine_ls_extinction_method      none
_refine_ls_extinction_coef        .
_refine_ls_number_reflns          7697
_refine_ls_number_parameters      370
_refine_ls_number_restraints      0
_refine_ls_R_factor_all           0.0242
_refine_ls_R_factor_gt            0.0223
_refine_ls_wR_factor_ref          0.0568
_refine_ls_wR_factor_gt           0.0556
_refine_ls_goodness_of_fit_ref    1.027
_refine_ls_restrained_S_all       1.027
_refine_ls_shift/su_max           0.004
_refine_ls_shift/su_mean          0.000
 
loop_
 _atom_site_label
 _atom_site_type_symbol
 _atom_site_fract_x
 _atom_site_fract_y
 _atom_site_fract_z
 _atom_site_U_iso_or_equiv
 _atom_site_adp_type
 _atom_site_occupancy
 _atom_site_site_symmetry_order  
 _atom_site_calc_flag
 _atom_site_refinement_flags_posn
 _atom_site_refinement_flags_adp
 _atom_site_refinement_flags_occupancy
 _atom_site_disorder_assembly
 _atom_site_disorder_group
Cd01 Cd 0.32704(2) 0.49673(2) 0.47485(2) 0.02306(4) Uani 1 1 d . . . . .
S002 S 0.67533(2) 0.36951(4) 0.77655(2) 0.03205(9) Uani 1 1 d . . . . .
S003 S 0.43242(2) -0.18302(4) 0.39533(2) 0.04039(11) Uani 1 1 d . . . . .
O004 O 0.79242(5) 0.80200(9) 0.96953(4) 0.0263(2) Uani 1 1 d . . . . .
O005 O 0.44067(5) 0.53294(10) 0.52591(5) 0.0293(2) Uani 1 1 d . . . . .
O006 O 0.80187(6) 0.88442(11) 0.89770(5) 0.0364(3) Uani 1 1 d . . . . .
O007 O 0.38653(5) 0.45494(12) 0.56799(5) 0.0348(3) Uani 1 1 d . . . . .
O008 O 0.65603(6) 0.28966(12) 0.80840(5) 0.0405(3) Uani 1 1 d . . . . .
N009 N 0.63192(5) -0.04270(10) 0.45143(5) 0.0207(2) Uani 1 1 d . . . . .
O00A O 0.72141(5) 0.33213(13) 0.75811(5) 0.0416(3) Uani 1 1 d . . . . .
N00B N 0.41004(6) 0.19956(12) 0.42607(6) 0.0295(3) Uani 1 1 d . . . . .
N00C N 0.72947(5) -0.06007(11) 0.46215(5) 0.0258(3) Uani 1 1 d . . . . .
N00D N 0.35098(6) 0.33833(12) 0.43654(5) 0.0286(3) Uani 1 1 d . . . . .
N00E N 0.50675(6) -0.16272(11) 0.41478(6) 0.0297(3) Uani 1 1 d . . . . .
C00F C 0.57663(7) 0.01310(12) 0.44832(6) 0.0210(3) Uani 1 1 d . . . . .
N00G N 0.41061(6) -0.05329(13) 0.40389(6) 0.0346(3) Uani 1 1 d . . . . .
C00H C 0.57754(7) 0.12940(13) 0.46229(7) 0.0270(3) Uani 1 1 d . . . . .
H00H H 0.616592 0.170417 0.477277 0.032 Uiso 1 1 calc R U . . .
C00I C 0.78562(6) 0.80004(14) 0.91943(6) 0.0253(3) Uani 1 1 d . . . . .
C00J C 0.68784(7) 0.01234(13) 0.46546(7) 0.0238(3) Uani 1 1 d . . . . .
H00J H 0.695837 0.092773 0.476270 0.029 Uiso 1 1 calc R U . . .
C00K C 0.72147(7) 0.61422(15) 0.89811(6) 0.0272(3) Uani 1 1 d . . . . .
H00K H 0.715741 0.627042 0.931159 0.033 Uiso 1 1 calc R U . . .
C00L C 0.40733(7) 0.29016(13) 0.45798(6) 0.0246(3) Uani 1 1 d . . . . .
H00L H 0.441792 0.315942 0.491704 0.029 Uiso 1 1 calc R U . . .
C00M C 0.52228(7) 0.19089(13) 0.45520(7) 0.0276(3) Uani 1 1 d . . . . .
H00M H 0.525079 0.272144 0.464689 0.033 Uiso 1 1 calc R U . . .
C00N C 0.49782(7) 0.46528(16) 0.62068(6) 0.0303(3) Uani 1 1 d . . . . .
C00O C 0.75632(6) 0.69395(14) 0.88345(6) 0.0244(3) Uani 1 1 d . . . . .
C00P C 0.51809(6) -0.04817(13) 0.42898(6) 0.0221(3) Uani 1 1 d . . . . .
C00Q C 0.55609(7) 0.48389(14) 0.62111(7) 0.0274(3) Uani 1 1 d . . . . .
H00Q H 0.558340 0.514984 0.588593 0.033 Uiso 1 1 calc R U . . .
C00R C 0.61126(7) 0.45724(15) 0.66893(7) 0.0288(3) Uani 1 1 d . . . . .
H00R H 0.651262 0.469257 0.669296 0.035 Uiso 1 1 calc R U . . .
C00S C 0.70456(7) 0.49873(14) 0.81707(6) 0.0268(3) Uani 1 1 d . . . . .
C00T C 0.63928(8) -0.15819(14) 0.43797(8) 0.0340(4) Uani 1 1 d . . . . .
H00T H 0.608372 -0.218780 0.426252 0.041 Uiso 1 1 calc R U . . .
C00U C 0.69492(7) 0.51580(15) 0.86482(6) 0.0287(3) Uani 1 1 d . . . . .
H00U H 0.670695 0.461350 0.874502 0.034 Uiso 1 1 calc R U . . .
C00V C 0.76384(7) 0.67683(15) 0.83454(6) 0.0299(3) Uani 1 1 d . . . . .
H00V H 0.786469 0.732993 0.823877 0.036 Uiso 1 1 calc R U . . .
C00W C 0.69925(8) -0.16689(14) 0.44493(8) 0.0332(3) Uani 1 1 d . . . . .
H00W H 0.717888 -0.236348 0.438848 0.040 Uiso 1 1 calc R U . . .
C00X C 0.46549(6) 0.13614(14) 0.43515(6) 0.0259(3) Uani 1 1 d . . . . .
C00Y C 0.73856(7) 0.57861(16) 0.80146(6) 0.0324(3) Uani 1 1 d . . . . .
H00Y H 0.744349 0.565815 0.768440 0.039 Uiso 1 1 calc R U . . .
C00Z C 0.43790(7) 0.48780(14) 0.56792(7) 0.0269(3) Uani 1 1 d . . . . .
C010 C 0.60683(7) 0.41296(17) 0.71591(6) 0.0332(4) Uani 1 1 d . . . . .
C011 C 0.46258(7) 0.01424(13) 0.42263(7) 0.0249(3) Uani 1 1 d . . . . .
C012 C 0.35115(8) 0.1916(2) 0.38045(9) 0.0545(6) Uani 1 1 d . . . . .
H012 H 0.338225 0.136719 0.350211 0.065 Uiso 1 1 calc R U . . .
C013 C 0.31594(8) 0.27736(19) 0.38767(8) 0.0500(6) Uani 1 1 d . . . . .
H013 H 0.273172 0.293360 0.362642 0.060 Uiso 1 1 calc R U . . .
C014 C 0.54919(8) 0.3909(3) 0.71574(7) 0.0645(8) Uani 1 1 d . . . . .
H014 H 0.547060 0.358398 0.748057 0.077 Uiso 1 1 calc R U . . .
C015 C 0.49456(8) 0.4169(3) 0.66776(7) 0.0626(7) Uani 1 1 d . . . . .
H015 H 0.454640 0.401599 0.667016 0.075 Uiso 1 1 calc R U . . .
 
loop_
 _atom_site_aniso_label
 _atom_site_aniso_U_11
 _atom_site_aniso_U_22
 _atom_site_aniso_U_33
 _atom_site_aniso_U_23
 _atom_site_aniso_U_13
 _atom_site_aniso_U_12
Cd01 0.01381(6) 0.03142(7) 0.02213(6) -0.00610(4) 0.00623(4) 0.00478(4)
S002 0.02149(17) 0.0497(2) 0.01884(18) -0.00873(15) 0.00322(14) 0.00027(16)
S003 0.02569(19) 0.0350(2) 0.0576(3) -0.0184(2) 0.01573(19) -0.01231(16)
O004 0.0243(5) 0.0326(5) 0.0202(5) 0.0016(4) 0.0081(4) -0.0030(4)
O005 0.0217(5) 0.0359(6) 0.0254(6) -0.0026(5) 0.0059(4) -0.0011(4)
O006 0.0408(6) 0.0420(7) 0.0295(6) 0.0021(5) 0.0183(5) -0.0139(5)
O007 0.0168(5) 0.0612(8) 0.0242(6) -0.0031(5) 0.0070(4) 0.0010(5)
O008 0.0381(6) 0.0476(7) 0.0268(6) -0.0074(5) 0.0060(5) -0.0092(6)
N009 0.0169(5) 0.0194(5) 0.0267(6) -0.0024(5) 0.0103(5) 0.0016(4)
O00A 0.0263(6) 0.0648(8) 0.0266(6) -0.0130(6) 0.0051(5) 0.0094(6)
N00B 0.0152(5) 0.0377(7) 0.0327(7) -0.0148(6) 0.0077(5) 0.0031(5)
N00C 0.0173(5) 0.0283(6) 0.0298(7) -0.0043(5) 0.0085(5) 0.0044(5)
N00D 0.0173(5) 0.0380(7) 0.0282(7) -0.0099(5) 0.0079(5) 0.0053(5)
N00E 0.0241(6) 0.0257(6) 0.0376(7) -0.0101(5) 0.0121(6) -0.0049(5)
C00F 0.0159(6) 0.0232(7) 0.0254(7) -0.0034(5) 0.0105(6) 0.0013(5)
N00G 0.0202(6) 0.0392(8) 0.0431(8) -0.0146(6) 0.0128(6) -0.0077(6)
C00H 0.0174(6) 0.0248(7) 0.0400(8) -0.0082(6) 0.0138(6) -0.0028(5)
C00I 0.0158(6) 0.0347(8) 0.0242(7) 0.0046(6) 0.0077(5) 0.0002(6)
C00J 0.0150(6) 0.0258(7) 0.0284(8) -0.0052(5) 0.0075(6) 0.0017(5)
C00K 0.0223(7) 0.0422(9) 0.0181(7) -0.0018(6) 0.0097(5) -0.0058(6)
C00L 0.0182(6) 0.0294(7) 0.0243(7) -0.0066(6) 0.0077(5) 0.0028(5)
C00M 0.0211(7) 0.0236(7) 0.0388(8) -0.0092(6) 0.0137(6) 0.0015(6)
C00N 0.0185(7) 0.0486(9) 0.0205(7) -0.0108(7) 0.0055(6) 0.0005(7)
C00O 0.0162(6) 0.0358(8) 0.0190(7) 0.0032(6) 0.0057(5) 0.0001(6)
C00P 0.0195(6) 0.0237(7) 0.0230(7) -0.0062(5) 0.0095(5) -0.0015(5)
C00Q 0.0215(7) 0.0318(8) 0.0277(8) -0.0024(6) 0.0098(6) 0.0003(6)
C00R 0.0181(7) 0.0358(8) 0.0300(8) -0.0054(6) 0.0084(6) -0.0010(6)
C00S 0.0162(6) 0.0434(9) 0.0172(7) -0.0039(6) 0.0039(5) 0.0003(6)
C00T 0.0295(8) 0.0204(7) 0.0573(11) -0.0083(7) 0.0237(8) -0.0004(6)
C00U 0.0219(7) 0.0447(9) 0.0198(7) -0.0031(6) 0.0092(6) -0.0081(6)
C00V 0.0249(7) 0.0442(9) 0.0237(7) 0.0053(6) 0.0135(6) -0.0013(6)
C00W 0.0280(8) 0.0247(7) 0.0493(10) -0.0051(7) 0.0193(7) 0.0059(6)
C00X 0.0169(6) 0.0317(8) 0.0297(8) -0.0094(6) 0.0107(6) 0.0026(6)
C00Y 0.0271(7) 0.0536(10) 0.0198(7) 0.0002(7) 0.0133(6) 0.0008(7)
C00Z 0.0188(7) 0.0363(8) 0.0232(7) -0.0107(6) 0.0069(6) 0.0017(6)
C010 0.0185(7) 0.0569(10) 0.0191(7) -0.0105(7) 0.0036(6) 0.0000(7)
C011 0.0171(6) 0.0318(8) 0.0263(7) -0.0090(6) 0.0099(6) -0.0034(5)
C012 0.0204(8) 0.0730(14) 0.0516(12) -0.0410(11) -0.0012(8) 0.0094(8)
C013 0.0184(7) 0.0671(13) 0.0480(11) -0.0320(10) -0.0006(7) 0.0104(8)
C014 0.0229(8) 0.151(3) 0.0186(8) 0.0039(11) 0.0085(7) -0.0018(12)
C015 0.0189(8) 0.146(2) 0.0220(8) 0.0015(11) 0.0083(7) -0.0022(11)
 
_geom_special_details
;
 All esds (except the esd in the dihedral angle between two l.s. planes)
 are estimated using the full covariance matrix.  The cell esds are taken
 into account individually in the estimation of esds in distances, angles
 and torsion angles; correlations between esds in cell parameters are only
 used when they are defined by crystal symmetry.  An approximate (isotropic)
 treatment of cell esds is used for estimating esds involving l.s. planes.
;
 
loop_
 _geom_bond_atom_site_label_1
 _geom_bond_atom_site_label_2
 _geom_bond_distance
 _geom_bond_site_symmetry_2
 _geom_bond_publ_flag
Cd01 N00D 2.2520(12) . ?
Cd01 N00C 2.2706(12) 3_455 ?
Cd01 O007 2.2801(11) . ?
Cd01 O006 2.2909(12) 8_465 ?
Cd01 O004 2.4088(11) 8_465 ?
Cd01 O005 2.4505(11) . ?
Cd01 C00I 2.6747(16) 8_465 ?
Cd01 C00Z 2.6907(15) . ?
S002 O00A 1.4369(12) . ?
S002 O008 1.4388(14) . ?
S002 C00S 1.7662(16) . ?
S002 C010 1.7730(16) . ?
S003 N00G 1.6077(15) . ?
S003 N00E 1.6140(13) . ?
O004 C00I 1.2590(18) . ?
O005 C00Z 1.248(2) . ?
O006 C00I 1.2591(18) . ?
O007 C00Z 1.2694(19) . ?
N009 C00J 1.3568(18) . ?
N009 C00T 1.3885(19) . ?
N009 C00F 1.4202(17) . ?
N00B C00L 1.3477(18) . ?
N00B C012 1.385(2) . ?
N00B C00X 1.4189(18) . ?
N00C C00J 1.3129(18) . ?
N00C C00W 1.378(2) . ?
N00D C00L 1.3143(18) . ?
N00D C013 1.374(2) . ?
N00E C00P 1.3466(19) . ?
C00F C00H 1.3678(19) . ?
C00F C00P 1.4262(19) . ?
N00G C011 1.3431(19) . ?
C00H C00M 1.4175(19) . ?
C00H H00H 0.9500 . ?
C00I C00O 1.501(2) . ?
C00J H00J 0.9500 . ?
C00K C00O 1.387(2) . ?
C00K C00U 1.388(2) . ?
C00K H00K 0.9500 . ?
C00L H00L 0.9500 . ?
C00M C00X 1.357(2) . ?
C00M H00M 0.9500 . ?
C00N C00Q 1.387(2) . ?
C00N C015 1.390(3) . ?
C00N C00Z 1.508(2) . ?
C00O C00V 1.390(2) . ?
C00P C011 1.433(2) . ?
C00Q C00R 1.391(2) . ?
C00Q H00Q 0.9500 . ?
C00R C010 1.383(2) . ?
C00R H00R 0.9500 . ?
C00S C00Y 1.388(2) . ?
C00S C00U 1.388(2) . ?
C00T C00W 1.349(2) . ?
C00T H00T 0.9500 . ?
C00U H00U 0.9500 . ?
C00V C00Y 1.379(2) . ?
C00V H00V 0.9500 . ?
C00W H00W 0.9500 . ?
C00X C011 1.417(2) . ?
C00Y H00Y 0.9500 . ?
C010 C014 1.382(2) . ?
C012 C013 1.347(2) . ?
C012 H012 0.9500 . ?
C013 H013 0.9500 . ?
C014 C015 1.385(3) . ?
C014 H014 0.9500 . ?
C015 H015 0.9500 . ?
 
loop_
 _geom_angle_atom_site_label_1
 _geom_angle_atom_site_label_2
 _geom_angle_atom_site_label_3
 _geom_angle
 _geom_angle_site_symmetry_1
 _geom_angle_site_symmetry_3
 _geom_angle_publ_flag
N00D Cd01 N00C 98.36(5) . 3_455 ?
N00D Cd01 O007 99.20(5) . . ?
N00C Cd01 O007 101.82(4) 3_455 . ?
N00D Cd01 O006 95.16(5) . 8_465 ?
N00C Cd01 O006 100.69(5) 3_455 8_465 ?
O007 Cd01 O006 151.13(5) . 8_465 ?
N00D Cd01 O004 151.18(4) . 8_465 ?
N00C Cd01 O004 87.95(4) 3_455 8_465 ?
O007 Cd01 O004 107.02(4) . 8_465 ?
O006 Cd01 O004 56.02(4) 8_465 8_465 ?
N00D Cd01 O005 87.16(4) . . ?
N00C Cd01 O005 157.43(4) 3_455 . ?
O007 Cd01 O005 55.62(4) . . ?
O006 Cd01 O005 100.58(4) 8_465 . ?
O004 Cd01 O005 97.74(4) 8_465 . ?
N00D Cd01 C00I 123.13(5) . 8_465 ?
N00C Cd01 C00I 93.46(4) 3_455 8_465 ?
O007 Cd01 C00I 132.24(5) . 8_465 ?
O006 Cd01 C00I 28.04(4) 8_465 8_465 ?
O004 Cd01 C00I 28.06(4) 8_465 8_465 ?
O005 Cd01 C00I 101.83(4) . 8_465 ?
N00D Cd01 C00Z 92.52(4) . . ?
N00C Cd01 C00Z 129.87(5) 3_455 . ?
O007 Cd01 C00Z 28.07(4) . . ?
O006 Cd01 C00Z 126.95(5) 8_465 . ?
O004 Cd01 C00Z 104.96(4) 8_465 . ?
O005 Cd01 C00Z 27.59(4) . . ?
C00I Cd01 C00Z 120.43(5) 8_465 . ?
O00A S002 O008 119.52(9) . . ?
O00A S002 C00S 107.28(8) . . ?
O008 S002 C00S 108.03(7) . . ?
O00A S002 C010 107.63(7) . . ?
O008 S002 C010 107.72(8) . . ?
C00S S002 C010 105.90(8) . . ?
N00G S003 N00E 101.26(7) . . ?
C00I O004 Cd01 87.79(9) . 8_566 ?
C00Z O005 Cd01 86.98(9) . . ?
C00I O006 Cd01 93.18(9) . 8_566 ?
C00Z O007 Cd01 94.26(10) . . ?
C00J N009 C00T 106.74(12) . . ?
C00J N009 C00F 124.76(12) . . ?
C00T N009 C00F 128.39(12) . . ?
C00L N00B C012 106.71(12) . . ?
C00L N00B C00X 125.08(12) . . ?
C012 N00B C00X 127.80(13) . . ?
C00J N00C C00W 106.14(12) . . ?
C00J N00C Cd01 123.57(10) . 3_545 ?
C00W N00C Cd01 130.01(10) . 3_545 ?
C00L N00D C013 105.83(13) . . ?
C00L N00D Cd01 123.02(10) . . ?
C013 N00D Cd01 131.03(10) . . ?
C00P N00E S003 106.36(10) . . ?
C00H C00F N009 120.60(13) . . ?
C00H C00F C00P 117.70(13) . . ?
N009 C00F C00P 121.67(12) . . ?
C011 N00G S003 106.08(11) . . ?
C00F C00H C00M 122.32(13) . . ?
C00F C00H H00H 118.8 . . ?
C00M C00H H00H 118.8 . . ?
O004 C00I O006 122.70(15) . . ?
O004 C00I C00O 119.25(13) . . ?
O006 C00I C00O 118.05(13) . . ?
O004 C00I Cd01 64.15(8) . 8_566 ?
O006 C00I Cd01 58.78(8) . 8_566 ?
C00O C00I Cd01 173.50(10) . 8_566 ?
N00C C00J N009 111.16(13) . . ?
N00C C00J H00J 124.4 . . ?
N009 C00J H00J 124.4 . . ?
C00O C00K C00U 120.44(14) . . ?
C00O C00K H00K 119.8 . . ?
C00U C00K H00K 119.8 . . ?
N00D C00L N00B 111.42(13) . . ?
N00D C00L H00L 124.3 . . ?
N00B C00L H00L 124.3 . . ?
C00X C00M C00H 121.38(14) . . ?
C00X C00M H00M 119.3 . . ?
C00H C00M H00M 119.3 . . ?
C00Q C00N C015 119.78(15) . . ?
C00Q C00N C00Z 120.47(15) . . ?
C015 C00N C00Z 119.57(14) . . ?
C00K C00O C00V 120.03(14) . . ?
C00K C00O C00I 120.80(13) . . ?
C00V C00O C00I 119.17(13) . . ?
N00E C00P C00F 127.80(13) . . ?
N00E C00P C011 112.62(12) . . ?
C00F C00P C011 119.58(13) . . ?
C00N C00Q C00R 120.31(15) . . ?
C00N C00Q H00Q 119.8 . . ?
C00R C00Q H00Q 119.8 . . ?
C010 C00R C00Q 118.82(14) . . ?
C010 C00R H00R 120.6 . . ?
C00Q C00R H00R 120.6 . . ?
C00Y C00S C00U 121.64(15) . . ?
C00Y C00S S002 119.08(12) . . ?
C00U C00S S002 119.24(12) . . ?
C00W C00T N009 106.03(14) . . ?
C00W C00T H00T 127.0 . . ?
N009 C00T H00T 127.0 . . ?
C00S C00U C00K 118.53(14) . . ?
C00S C00U H00U 120.7 . . ?
C00K C00U H00U 120.7 . . ?
C00Y C00V C00O 120.23(14) . . ?
C00Y C00V H00V 119.9 . . ?
C00O C00V H00V 119.9 . . ?
C00T C00W N00C 109.93(13) . . ?
C00T C00W H00W 125.0 . . ?
N00C C00W H00W 125.0 . . ?
C00M C00X C011 118.45(13) . . ?
C00M C00X N00B 120.94(14) . . ?
C011 C00X N00B 120.61(13) . . ?
C00V C00Y C00S 119.10(14) . . ?
C00V C00Y H00Y 120.5 . . ?
C00S C00Y H00Y 120.5 . . ?
O005 C00Z O007 122.98(14) . . ?
O005 C00Z C00N 119.66(14) . . ?
O007 C00Z C00N 117.30(15) . . ?
O005 C00Z Cd01 65.43(8) . . ?
O007 C00Z Cd01 57.68(8) . . ?
C00N C00Z Cd01 172.10(12) . . ?
C014 C010 C00R 121.65(15) . . ?
C014 C010 S002 117.35(14) . . ?
C00R C010 S002 120.75(12) . . ?
N00G C011 C00X 125.85(14) . . ?
N00G C011 C00P 113.69(13) . . ?
C00X C011 C00P 120.46(13) . . ?
C013 C012 N00B 106.04(15) . . ?
C013 C012 H012 127.0 . . ?
N00B C012 H012 127.0 . . ?
C012 C013 N00D 109.99(14) . . ?
C012 C013 H013 125.0 . . ?
N00D C013 H013 125.0 . . ?
C010 C014 C015 119.02(18) . . ?
C010 C014 H014 120.5 . . ?
C015 C014 H014 120.5 . . ?
C014 C015 C00N 120.36(17) . . ?
C014 C015 H015 119.8 . . ?
C00N C015 H015 119.8 . . ?
 
_refine_diff_density_max    0.588
_refine_diff_density_min   -0.598
_refine_diff_density_rms    0.050

_shelx_res_file
;
TITL 1_a.res in C2/c
    pvl691_sq.res
    created by SHELXL-2018/3 at 13:42:25 on 25-May-2021
REM Old TITL 1 in C2/c
REM SHELXT solution in C2/c: R1 0.144, Rweak 0.004, Alpha 0.033
REM <I/s>   1.634 for  337 systematic absences,  Orientation as input
REM Formula found by SHELXT:  C26 N7 O6 S2 Cd

CELL  0.71073  23.6070  11.3468  26.3689   90.000  116.055   90.000
ZERR    8.000   0.0007   0.0002   0.0008    0.000    0.004    0.000
LATT  7
SYMM -X, Y, 1/2-Z
SFAC C H N O S CD
UNIT 208 128 48 48 16 8
LIST 4 ! automatically inserted. Change 6 to 4 for CHECKCIF!!
ACTA
L.S. 5 0   54
TEMP -121
BOND $H
FMAP 2
PLAN 20
ABIN
WGHT    0.024300    8.179600
FVAR       0.15959
CD01  6    0.327041    0.496733    0.474850    11.00000    0.01381    0.03142 =
         0.02213   -0.00610    0.00623    0.00478
S002  5    0.675331    0.369513    0.776555    11.00000    0.02149    0.04968 =
         0.01884   -0.00873    0.00322    0.00027
S003  5    0.432416   -0.183019    0.395333    11.00000    0.02569    0.03504 =
         0.05763   -0.01838    0.01573   -0.01231
O004  4    0.792415    0.802002    0.969531    11.00000    0.02430    0.03259 =
         0.02023    0.00161    0.00813   -0.00296
O005  4    0.440675    0.532944    0.525914    11.00000    0.02169    0.03594 =
         0.02537   -0.00261    0.00589   -0.00112
O006  4    0.801874    0.884418    0.897705    11.00000    0.04082    0.04201 =
         0.02954    0.00210    0.01825   -0.01388
O007  4    0.386528    0.454935    0.567985    11.00000    0.01683    0.06118 =
         0.02424   -0.00310    0.00705    0.00101
O008  4    0.656027    0.289662    0.808403    11.00000    0.03806    0.04759 =
         0.02684   -0.00744    0.00595   -0.00921
N009  3    0.631916   -0.042696    0.451434    11.00000    0.01686    0.01940 =
         0.02670   -0.00240    0.01030    0.00157
O00A  4    0.721409    0.332130    0.758107    11.00000    0.02635    0.06484 =
         0.02657   -0.01298    0.00505    0.00937
N00B  3    0.410039    0.199563    0.426067    11.00000    0.01517    0.03767 =
         0.03265   -0.01480    0.00770    0.00307
N00C  3    0.729472   -0.060066    0.462154    11.00000    0.01735    0.02834 =
         0.02984   -0.00426    0.00852    0.00440
N00D  3    0.350979    0.338330    0.436543    11.00000    0.01728    0.03799 =
         0.02816   -0.00993    0.00792    0.00529
N00E  3    0.506753   -0.162721    0.414780    11.00000    0.02412    0.02573 =
         0.03757   -0.01011    0.01214   -0.00486
C00F  1    0.576627    0.013095    0.448317    11.00000    0.01595    0.02321 =
         0.02539   -0.00335    0.01050    0.00132
N00G  3    0.410610   -0.053290    0.403888    11.00000    0.02022    0.03921 =
         0.04307   -0.01463    0.01276   -0.00766
C00H  1    0.577544    0.129401    0.462291    11.00000    0.01741    0.02484 =
         0.04000   -0.00824    0.01378   -0.00280
AFIX  43
H00H  2    0.616592    0.170417    0.477277    11.00000   -1.20000
AFIX   0
C00I  1    0.785618    0.800044    0.919433    11.00000    0.01580    0.03472 =
         0.02418    0.00462    0.00765    0.00020
C00J  1    0.687843    0.012340    0.465463    11.00000    0.01502    0.02575 =
         0.02843   -0.00520    0.00753    0.00168
AFIX  43
H00J  2    0.695837    0.092773    0.476270    11.00000   -1.20000
AFIX   0
C00K  1    0.721474    0.614217    0.898112    11.00000    0.02233    0.04222 =
         0.01805   -0.00176    0.00971   -0.00581
AFIX  43
H00K  2    0.715741    0.627042    0.931159    11.00000   -1.20000
AFIX   0
C00L  1    0.407333    0.290163    0.457984    11.00000    0.01821    0.02937 =
         0.02428   -0.00662    0.00766    0.00276
AFIX  43
H00L  2    0.441792    0.315942    0.491704    11.00000   -1.20000
AFIX   0
C00M  1    0.522283    0.190890    0.455200    11.00000    0.02112    0.02361 =
         0.03877   -0.00921    0.01374    0.00151
AFIX  43
H00M  2    0.525079    0.272144    0.464689    11.00000   -1.20000
AFIX   0
C00N  1    0.497821    0.465281    0.620681    11.00000    0.01845    0.04864 =
         0.02053   -0.01075    0.00552    0.00048
C00O  1    0.756318    0.693947    0.883446    11.00000    0.01624    0.03580 =
         0.01902    0.00324    0.00566    0.00013
C00P  1    0.518088   -0.048166    0.428982    11.00000    0.01954    0.02374 =
         0.02305   -0.00624    0.00949   -0.00152
C00Q  1    0.556091    0.483890    0.621110    11.00000    0.02152    0.03180 =
         0.02765   -0.00239    0.00975    0.00028
AFIX  43
H00Q  2    0.558340    0.514984    0.588593    11.00000   -1.20000
AFIX   0
C00R  1    0.611256    0.457243    0.668925    11.00000    0.01808    0.03581 =
         0.03004   -0.00545    0.00840   -0.00099
AFIX  43
H00R  2    0.651262    0.469257    0.669296    11.00000   -1.20000
AFIX   0
C00S  1    0.704560    0.498731    0.817069    11.00000    0.01616    0.04338 =
         0.01717   -0.00388    0.00390    0.00034
C00T  1    0.639283   -0.158194    0.437975    11.00000    0.02950    0.02037 =
         0.05729   -0.00831    0.02369   -0.00043
AFIX  43
H00T  2    0.608372   -0.218780    0.426252    11.00000   -1.20000
AFIX   0
C00U  1    0.694924    0.515805    0.864816    11.00000    0.02189    0.04466 =
         0.01976   -0.00306    0.00922   -0.00806
AFIX  43
H00U  2    0.670695    0.461350    0.874502    11.00000   -1.20000
AFIX   0
C00V  1    0.763839    0.676831    0.834540    11.00000    0.02492    0.04416 =
         0.02367    0.00535    0.01345   -0.00132
AFIX  43
H00V  2    0.786469    0.732993    0.823877    11.00000   -1.20000
AFIX   0
C00W  1    0.699246   -0.166887    0.444926    11.00000    0.02802    0.02473 =
         0.04929   -0.00508    0.01935    0.00589
AFIX  43
H00W  2    0.717888   -0.236348    0.438848    11.00000   -1.20000
AFIX   0
C00X  1    0.465487    0.136140    0.435145    11.00000    0.01690    0.03168 =
         0.02968   -0.00945    0.01072    0.00261
C00Y  1    0.738562    0.578613    0.801463    11.00000    0.02715    0.05363 =
         0.01978    0.00017    0.01327    0.00085
AFIX  43
H00Y  2    0.744349    0.565815    0.768440    11.00000   -1.20000
AFIX   0
C00Z  1    0.437897    0.487795    0.567921    11.00000    0.01876    0.03630 =
         0.02315   -0.01067    0.00692    0.00169
C010  1    0.606835    0.412958    0.715909    11.00000    0.01852    0.05687 =
         0.01915   -0.01049    0.00364    0.00000
C011  1    0.462581    0.014236    0.422630    11.00000    0.01709    0.03184 =
         0.02628   -0.00905    0.00994   -0.00337
C012  1    0.351150    0.191574    0.380448    11.00000    0.02044    0.07303 =
         0.05157   -0.04096   -0.00120    0.00936
AFIX  43
H012  2    0.338225    0.136719    0.350211    11.00000   -1.20000
AFIX   0
C013  1    0.315941    0.277359    0.387665    11.00000    0.01840    0.06706 =
         0.04796   -0.03197   -0.00060    0.01043
AFIX  43
H013  2    0.273172    0.293360    0.362642    11.00000   -1.20000
AFIX   0
C014  1    0.549186    0.390911    0.715738    11.00000    0.02287    0.15136 =
         0.01861    0.00387    0.00854   -0.00177
AFIX  43
H014  2    0.547060    0.358398    0.748057    11.00000   -1.20000
AFIX   0
C015  1    0.494563    0.416906    0.667761    11.00000    0.01886    0.14623 =
         0.02196    0.00151    0.00832   -0.00224
AFIX  43
H015  2    0.454640    0.401599    0.667016    11.00000   -1.20000
AFIX   0
HKLF 4


REM  1_a.res in C2/c
REM wR2 = 0.0568, GooF = S = 1.027, Restrained GooF = 1.027 for all data
REM R1 = 0.0223 for 7175 Fo > 4sig(Fo) and 0.0242 for all 7697 data
REM 370 parameters refined using 0 restraints

END

WGHT      0.0243      8.1797

REM Highest difference peak  0.588,  deepest hole -0.598,  1-sigma level  0.050
Q1    1   0.4968  0.4863  0.6736  11.00000  0.05    0.59
Q2    1   0.5506  0.4625  0.7197  11.00000  0.05    0.57
Q3    1   0.4906 -0.0087  0.4228  11.00000  0.05    0.32
Q4    1   0.7717  0.7409  0.9007  11.00000  0.05    0.31
Q5    1   0.4610  0.0797  0.4256  11.00000  0.05    0.31
Q6    1   0.6374  0.3953  0.7440  11.00000  0.05    0.30
Q7    1   0.7505  0.6436  0.8955  11.00000  0.05    0.29
Q8    1   0.4686  0.4742  0.5974  11.00000  0.05    0.29
Q9    1   0.5494 -0.0195  0.4412  11.00000  0.05    0.29
Q10   1   0.3820  0.2033  0.3958  11.00000  0.05    0.29
Q11   1   0.6910  0.4440  0.8003  11.00000  0.05    0.28
Q12   1   0.6055 -0.0200  0.4526  11.00000  0.05    0.27
Q13   1   0.4395  0.1589  0.4366  11.00000  0.05    0.26
Q14   1   0.7025  0.5079  0.8394  11.00000  0.05    0.26
Q15   1   0.3497  0.1461  0.4027  11.00000  0.05    0.26
Q16   1   0.7686  0.6719  0.8669  11.00000  0.05    0.26
Q17   1   0.5746  0.0771  0.4427  11.00000  0.05    0.25
Q18   1   0.3109  0.2345  0.4085  11.00000  0.05    0.25
Q19   1   0.3483  0.4158  0.4658  11.00000  0.05    0.25
Q20   1   0.4096  0.2513  0.4366  11.00000  0.05    0.25
;
_shelx_res_checksum   46289

_shelx_hkl_file
;
   0   0  -3    1.55    0.28
   0   0   3    1.71    0.28
   0   0   3    1.41    0.26
   0   0   3    1.28    0.26
   0   0  -3    1.14    0.25
   0   0  -3    1.79    0.30
   0   0   4 1849.92    9.92
   0   0  -4 1879.28    9.96
   0   0   4 1820.24    9.82
   0   0  -4 1854.19    9.80
   0   0  -4 1871.79    9.64
   0   0   5   -0.16    0.19
   0   0  -5    0.49    0.25
   0   0  -5    0.35    0.21
   0   0   5    0.37    0.28
   0   0  -5    0.37    0.28
   0   0   6 2389.22   13.85
   0   0  -6 2414.82   13.90
   0   0  -6 2431.35   13.81
   0   0   6 2395.96   13.79
   0   0  -6 2358.93   13.48
   0   0   7    0.70    0.28
   0   0  -7    1.23    0.48
   0   0   7    1.71    0.60
   0   0  -7    0.44    0.33
   0   0  -7    0.93    0.48
   0   0   8  956.27   10.15
   0   0  -8  962.79   10.20
   0   0  -8  962.58   10.08
   0   0   8  949.72   10.08
   0   0  -8  931.28    9.83
   0   0  -8  954.38    9.99
   0   0  -9    0.32    0.30
   0   0   9    0.42    0.42
   0   0   9    0.51    0.46
   0   0  -9    0.18    0.26
   0   0  -9    0.35    0.23
   0   0  -9    0.83    0.33
   0   0  -9    1.60    0.49
   0   0  10   26.86    1.95
   0   0 -10   26.86    1.92
   0   0 -10   28.32    1.97
   0   0  10   25.33    1.86
   0   0 -10   28.43    1.94
   0   0 -10   27.81    1.95
   0   0 -10   26.81    1.37
   0   0  11   -0.14    0.26
   0   0 -11    0.49    0.49
   0   0 -11    0.33    0.44
   0   0  11    0.72    0.51
   0   0 -11    0.76    0.39
   0   0 -11    0.44    0.37
   0   0 -11    0.97    0.35
   0   0  12  902.82   12.31
   0   0 -12  881.51   12.14
   0   0 -12  884.61   11.95
   0   0  12  884.65   12.00
   0   0 -12  882.24    8.50
   0   0 -12  855.60   11.84
   0   0 -13    1.35    0.72
   0   0  13    1.64    0.63
   0   0 -13    0.79    0.53
   0   0  13    1.18    0.60
   0   0 -13    1.28    0.69
   0   0 -13    1.57    0.49
   0   0 -14 1814.73   18.81
   0   0  14 1896.12   19.46
   0   0 -14 1925.30   18.95
   0   0  14 1859.21   18.91
   0   0 -14 1807.54   18.72
   0   0 -15    2.06    0.84
   0   0  15    2.97    0.88
   0   0 -15    3.89    0.53
   0   0  15    2.96    0.91
   0   0 -15    2.97    0.95
   0   0 -15    2.66    0.93
   0   0 -15    2.20    0.53
   0   0  16  853.03   14.06
   0   0 -16  814.77   13.53
   0   0 -16  784.31    7.14
   0   0 -16  862.39   13.65
   0   0  16  799.16   13.46
   0   0 -16  796.58    9.25
   0   0 -16  793.92   13.32
   0   0 -17    2.22    0.79
   0   0 -17    1.27    0.40
   0   0  17    1.25    0.63
   0   0 -17    1.69    0.37
   0   0 -17    1.83    0.72
   0   0  17    1.39    0.77
   0   0 -17    1.50    0.83
   0   0 -18  202.28    7.25
   0   0 -18  195.21    3.62
   0   0  18  196.65    7.13
   0   0 -18  168.06    4.68
   0   0 -18  203.71    7.25
   0   0 -19    5.26    0.93
   0   0 -19    4.45    1.57
   0   0 -19    2.69    0.44
   0   0  19    6.60    1.67
   0   0 -19    6.54    1.71
   0   0 -20 1484.18   14.09
   0   0 -20 1522.45    9.87
   0   0  20 1531.74   21.23
   0   0 -20 1528.24   21.27
   0   0 -21    8.04    1.13
   0   0 -21    7.78    0.67
   0   0  21    8.90    1.81
   0   0 -21    8.22    1.72
   0   0 -22  556.93    8.94
   0   0 -22  591.13    5.58
   0   0  22  576.83   13.79
   0   0 -22  585.68   13.95
   0   0 -23    4.15    0.77
   0   0  23    4.75    1.39
   0   0 -23    6.40    1.65
   0   0  24  364.22   11.70
   0   0 -24  365.21   11.70
   0   0  25    3.45    1.27
   0   0 -25    3.29    1.25
   0   0  26   27.51    3.45
   0   0 -26   25.69    3.31
   0   0  27    0.99    0.79
   0   0 -27   -0.07    0.53
   0   0  28    6.51    1.88
   0   0 -28    4.20    1.46
   0   2   0 6592.89   15.71
   0  -2   0 6490.62   15.48
   0   2   0 6573.82   18.28
   0  -2   0 6627.67   18.28
   0  -2   1 1849.65    9.10
   0   2  -1 1811.74    9.03
   0   2   1 1888.60    8.09
   0  -2  -1 1865.15    7.99
   0   2   1 1887.97    8.90
   0  -2  -1 1851.24    8.92
   0   2   1 1847.16    9.98
   0  -2  -1 1844.99    9.55
   0  -2   1 1942.16   10.85
   0   2  -1 1843.16   10.63
   0   2   1 1866.31    9.75
   0  -2   1 1872.03    9.92
   0  -2  -1 1881.85    9.80
   0   2  -1 1821.95    9.87
   0  -2   2 2626.49   11.77
   0   2  -2 2580.36   11.59
   0   2   2 2647.09   11.08
   0   2   2 2570.64   11.93
   0   2   2 2579.80   10.77
   0  -2  -2 2604.62   11.89
   0  -2   2 2598.13   13.04
   0   2   2 2614.74   11.96
   0  -2  -2 2640.79   11.96
   0   2  -2 2565.18   13.02
   0   2   2 2570.67   12.00
   0  -2  -2 2658.39   12.10
   0   2  -3 3420.11   14.62
   0  -2   3 3409.61   14.67
   0   2   3 3381.71   11.75
   0   2   3 3395.76   13.69
   0  -2  -3 3404.23   13.78
   0   2  -3 3438.76   15.64
   0  -2   3 3373.16   15.53
   0   2   3 3342.00   14.37
   0  -2  -3 3413.59   14.43
   0  -2  -3 3435.19   14.67
   0   2   3 3327.79   14.51
   0   2  -4 2159.65   12.70
   0  -2   4 2132.31   12.68
   0   2   4 2124.79    8.74
   0   2   4 2203.88   11.22
   0  -2  -4 2129.10   11.10
   0   2   4 2162.61   12.30
   0   2  -4 2154.68   13.04
   0  -2   4 2145.67   12.95
   0  -2  -4 2174.89   12.42
   0   2   4 2125.89   12.33
   0   2  -5  205.48    4.24
   0  -2   5  211.43    4.28
   0   2   5  208.42    3.54
   0   2   5  198.01    2.55
   0  -2  -5  197.39    3.52
   0   2  -5  210.62    4.33
   0  -2   5  212.84    4.35
   0   2   5  207.10    4.10
   0  -2  -5  213.54    4.15
   0  -2  -5  214.00    4.19
   0   2   5  208.82    4.12
   0  -2   6 1933.25   13.90
   0   2  -6 1896.27   13.81
   0   2   6 1848.93    7.13
   0   2   6 1934.24   11.15
   0  -2  -6 1865.89   11.10
   0   2   6 1906.21   13.21
   0  -2  -6 1900.58   13.23
   0   2  -6 1901.52   13.69
   0  -2   6 1908.87   13.74
   0   2   6 1891.49   13.23
   0  -2  -6 1959.03   13.51
   0   2  -7    1.35    0.56
   0  -2   7    1.69    0.49
   0   2   7    2.22    0.49
   0   2   7    1.11    0.37
   0  -2  -7    0.58    0.28
   0   2  -7    1.04    0.35
   0  -2  -7    0.74    0.35
   0  -2   7    1.30    0.53
   0   2   7    1.11    0.49
   0   2   7    1.09    0.40
   0  -2  -7    0.60    0.37
   0  -2   8    5.68    0.91
   0   2  -8    6.19    1.00
   0   2   8    4.52    0.74
   0  -2  -8    5.05    0.67
   0   2   8    7.39    0.99
   0  -2  -8    5.93    0.84
   0   2  -8    6.03    0.88
   0  -2   8    7.02    1.00
   0   2   8    4.98    0.77
   0  -2  -8    5.86    0.90
   0   2   9   66.87    2.80
   0  -2   9   72.99    3.20
   0   2  -9   69.81    3.11
   0  -2  -9   66.15    2.30
   0   2   9   68.10    2.97
   0   2  -9   68.26    3.04
   0  -2  -9   65.30    2.96
   0  -2   9   68.91    3.01
   0  -2  -9   68.22    2.99
   0   2   9   64.69    2.89
   0  -2  10   92.17    3.82
   0   2 -10   93.17    3.78
   0   2  10   93.49    3.50
   0  -2 -10   90.64    2.80
   0  -2  10   90.46    3.61
   0  -2  10   89.81    3.66
   0   2 -10   92.20    3.68
   0   2  10   90.34    3.59
   0  -2 -10   85.59    3.59
   0  -2 -10   91.92    3.61
   0   2  10   94.14    3.66
   0  -2  11   30.54    2.29
   0   2 -11   30.45    2.29
   0   2  11   29.41    2.09
   0  -2 -11   29.34    1.67
   0   2 -11   30.84    2.23
   0  -2  11   29.94    2.20
   0  -2 -11   29.73    2.18
   0  -2  11   26.51    2.08
   0   2  11   30.84    2.18
   0  -2 -11   30.05    2.15
   0   2  11   36.10    2.38
   0   2 -12  252.59    6.83
   0   2  12  248.14    6.35
   0  -2  12  269.48    7.11
   0  -2 -12  239.56    4.89
   0  -2 -12  262.82    6.74
   0   2  12  252.95    6.51
   0  -2  12  255.62    6.69
   0   2 -12  267.09    6.79
   0  -2  12  250.55    6.56
   0  -2 -12  263.03    6.65
   0   2  12  252.30    6.56
   0   2  13   35.26    2.52
   0   2 -13   33.92    2.59
   0  -2  13   36.22    2.73
   0  -2 -13   32.85    1.88
   0  -2 -13   32.49    2.46
   0  -2  13   32.23    2.48
   0   2  13   35.31    2.52
   0  -2  13   32.97    2.50
   0   2 -13   35.47    2.59
   0  -2 -13   32.67    2.45
   0   2 -14  189.63    6.40
   0   2  14  199.45    6.19
   0   2 -14  182.24    2.59
   0  -2  14  209.97    6.74
   0  -2 -14  190.77    4.66
   0   2 -14  208.14    6.47
   0  -2  14  191.74    6.25
   0  -2  14  200.70    6.33
   0   2  14  202.63    6.28
   0  -2 -14  208.31    6.54
   0  -2 -14  196.21    6.25
   0  -2  15   79.25    4.29
   0   2  15   75.51    3.96
   0   2 -15   75.77    4.15
   0   2 -15   71.07    1.69
   0  -2 -15   75.51    3.03
   0  -2 -15   78.01    4.13
   0   2  15   77.94    4.03
   0   2 -15   79.24    4.13
   0  -2 -15   81.58    4.10
   0  -2  15   76.99    4.08
   0  -2  15   73.59    4.01
   0  -2 -15   74.66    3.96
   0   2  16  470.67   10.26
   0   2 -16  444.55   10.43
   0  -2  16  469.72   10.84
   0  -2 -16  434.98    7.46
   0   2  16  455.14   10.17
   0  -2  16  436.28   10.13
   0  -2 -16  484.91   10.38
   0  -2 -16  470.66   10.56
   0  -2  16  439.92   10.01
   0   2 -16  483.23   10.54
   0  -2 -16  441.73   10.05
   0   2 -17   11.24    0.72
   0   2 -17   10.94    1.71
   0   2  17   12.33    1.76
   0   2 -17   11.70    1.27
   0  -2 -17   13.41    1.37
   0  -2 -17   10.45    1.60
   0   2 -17   14.53    1.94
   0  -2  17   11.84    1.76
   0  -2  17   11.68    1.72
   0   2  17   14.00    1.95
   0  -2 -17   10.78    1.44
   0  -2 -17   14.55    1.95
   0   2 -18  770.63   14.62
   0   2 -18  775.27    6.05
   0  -2 -18  803.68   10.73
   0   2 -18  769.87   10.40
   0   2  18  810.23   14.50
   0  -2  18  783.12   14.48
   0  -2 -18  799.60   14.51
   0  -2 -18  770.14   11.89
   0   2 -19  106.00    5.59
   0  -2 -19  104.13    3.98
   0   2 -19  101.60    3.84
   0   2  19  107.46    5.51
   0  -2  19   94.84    5.24
   0   2 -19  103.83    5.40
   0  -2 -19  100.84    4.40
   0  -2 -19  106.58    5.49
   0   2 -20 1038.62   18.03
   0   2 -20 1024.38   12.23
   0  -2 -20 1020.55   12.72
   0   2  20 1037.98   17.56
   0  -2  20 1050.63   17.80
   0  -2 -20 1021.11   14.34
   0  -2 -20 1061.70   17.75
   0   2 -20 1024.79   17.56
   0   2 -21  192.50    7.99
   0  -2 -21  183.03    5.51
   0   2 -21  196.25    5.38
   0  -2  21  189.63    7.83
   0   2  21  205.92    8.06
   0  -2 -21  191.41    7.81
   0   2 -21  197.78    7.95
   0  -2 -21  184.09    6.23
   0   2 -22  365.63   11.28
   0  -2 -22  359.21    7.86
   0   2 -22  354.84    7.27
   0   2  22  378.93   11.22
   0  -2  22  350.85   10.98
   0  -2 -22  369.62   11.21
   0   2 -22  368.32   11.21
   0  -2 -22  358.29    8.71
   0   2 -23    4.40    1.39
   0  -2 -23    3.48    0.90
   0   2 -23    4.56    0.93
   0  -2  23    4.79    1.50
   0   2  23    4.86    1.48
   0   2 -23    1.88    1.04
   0  -2 -23    4.84    1.48
   0  -2 -23    3.76    1.04
   0   2 -24  206.29    8.99
   0  -2  24  203.02    8.78
   0   2  24  207.17    8.85
   0  -2 -24  208.26    8.88
   0   2 -24  211.25    8.90
   0   2 -25    5.38    1.60
   0  -2  25    4.22    1.41
   0   2  25    5.10    1.81
   0  -2 -25    4.50    1.79
   0   2 -25    3.87    1.44
   0  -2  26  182.65    8.78
   0   2  26  183.53    8.83
   0   2 -26  183.02    8.81
   0  -2 -26  184.55    8.85
   0   2  27    0.53    1.00
   0  -2  27    0.44    0.70
   0  -2 -27    1.37    1.13
   0   2 -27    0.02    0.84
   0   2  28   10.71    2.32
   0  -2  28   10.94    2.20
   0   2 -28   11.56    2.43
   0  -2 -28    9.78    2.29
   0  -4   0 3189.74   16.54
   0   4   0 3247.39   15.62
   0  -4   0 3185.85   15.32
   0  -4   0 3259.30   18.26
   0   4   0 3233.51   18.05
   0  -4   0 3251.45   19.81
   0  -4  -1  126.81    2.96
   0   4   1  134.78    3.85
   0  -4  -1  125.73    3.31
   0   4  -1  126.10    3.22
   0   4   1  132.91    3.10
   0  -4   1  124.19    3.15
   0  -4   1  128.90    3.68
   0  -4  -1  134.20    3.71
   0   4  -1  127.67    3.62
   0   4   1  134.39    3.68
   0  -4   1  127.53    3.98
   0   4   2 4590.96   18.01
   0   4  -2 4576.86   20.09
   0   4   2 4616.97   23.20
   0  -4  -2 4511.74   19.70
   0   4   2 4624.57   21.39
   0  -4  -2 4606.63   17.66
   0  -4  -2 4628.96   21.66
   0   4   2 4578.27   21.71
   0   4  -2 4590.39   22.17
   0  -4   2 4606.89   23.94
   0  -4  -2 4576.12   21.94
   0   4  -3  256.32    4.98
   0  -4   3  269.08    5.14
   0   4   3  281.90    5.59
   0   4   3  260.81    5.01
   0   4   3  267.53    4.36
   0   4   3  263.94    4.84
   0  -4   3  267.74    5.86
   0  -4  -3  268.99    5.30
   0   4  -3  268.62    5.52
   0  -4  -3  266.63    5.42
   0   4  -3  262.76    5.89
   0   4   3  266.48    5.33
   0   4  -4  359.44    6.19
   0  -4   4  366.01    6.28
   0   4   4  358.34    5.70
   0   4   4  364.11    5.26
   0   4   4  378.96    6.51
   0   4   4  370.29    5.89
   0   4   4  370.64    6.40
   0  -4  -4  356.51    6.32
   0  -4   4  354.93    6.88
   0  -4  -4  361.83    6.42
   0   4   4  358.52    6.35
   0   4  -4  363.78    6.60
   0   4  -4  361.05    6.98
   0   4  -5  874.81   10.17
   0  -4   5  906.62   10.40
   0   4   5  877.15    9.90
   0   4   5  887.51    9.45
   0  -4  -5  870.82    9.94
   0   4   5  885.30    8.69
   0   4   5  895.01   10.26
   0  -4  -5  879.98   10.19
   0  -4   5  905.91   11.17
   0   4   5  891.52   10.33
   0  -4  -5  896.34   10.36
   0   4  -5  917.67   11.29
   0  -4   6 2231.22   16.99
   0   4  -6 2193.96   16.85
   0  -4  -6 2156.70   15.82
   0   4   6 2174.08   13.23
   0   4   6 2208.86   15.85
   0  -4   6 2204.44   17.86
   0  -4  -6 2162.26   16.54
   0   4  -6 2236.29   18.21
   0   4   6 2186.87   16.61
   0  -4  -6 2229.36   16.87
   0   4   6 2124.35   16.61
   0  -4   7  297.07    6.51
   0   4  -7  289.19    6.37
   0  -4  -7  285.28    5.79
   0   4   7  273.93    4.57
   0   4   7  283.96    5.72
   0   4   7  277.82    6.14
   0  -4   7  281.43    6.54
   0  -4  -7  285.58    6.16
   0   4  -7  289.57    6.72
   0   4   7  292.37    6.33
   0  -4  -7  289.01    6.28
   0   4  -8    0.77    0.33
   0  -4   8    1.28    0.55
   0  -4  -8    0.33    0.35
   0   4   8    0.18    0.19
   0   4   8    0.35    0.32
   0   4   8    0.72    0.46
   0  -4   8    0.35    0.44
   0  -4  -8    0.30    0.25
   0   4  -8    2.04    0.56
   0  -4  -8    0.60    0.51
   0   4   8    1.51    0.56
   0  -4   9  294.80    7.05
   0   4  -9  278.97    6.81
   0  -4  -9  307.11    6.12
   0   4   9  281.62    4.29
   0   4   9  293.23    5.91
   0   4  -9  295.56    7.28
   0   4   9  288.96    6.70
   0  -4  -9  305.28    6.90
   0  -4   9  298.39    7.13
   0   4   9  301.50    6.90
   0  -4  -9  297.67    6.88
   0  -4  10   34.09    2.50
   0   4  10   31.77    2.08
   0   4 -10   33.83    2.50
   0  -4  10   31.98    0.95
   0  -4 -10   33.78    2.04
   0   4  10   30.19    1.94
   0   4 -10   35.52    2.60
   0   4  10   34.45    2.39
   0  -4  10   32.85    2.48
   0  -4 -10   32.81    2.36
   0  -4 -10   30.66    2.32
   0   4  10   31.35    2.30
   0   4 -11   67.94    3.64
   0   4  11   70.04    3.22
   0  -4  11   74.65    3.85
   0  -4 -11   71.37    3.04
   0   4  11   72.87    3.06
   0  -4 -11   74.61    3.66
   0  -4  11   68.47    3.66
   0   4 -11   73.22    3.84
   0   4  11   68.72    3.50
   0   4  11   72.24    3.66
   0  -4 -11   71.62    3.66
   0   4 -12  255.50    7.25
   0   4  12  253.37    6.39
   0  -4  12  273.34    7.64
   0  -4 -12  250.66    5.77
   0   4  12  253.32    5.75
   0   4  12  259.84    7.04
   0   4 -12  270.10    7.56
   0  -4  12  259.88    7.30
   0  -4 -12  260.28    7.16
   0  -4 -12  265.75    7.21
   0   4  12  254.55    7.07
   0   4 -13   24.14    2.32
   0  -4  13   26.90    2.48
   0   4  13   27.71    2.22
   0  -4 -13   24.23    1.85
   0  -4 -13   29.19    2.48
   0   4 -13   31.24    2.67
   0  -4  13   26.79    2.45
   0   4  13   28.08    2.43
   0  -4 -13   26.39    2.39
   0   4  13   25.69    2.32
   0   4  14  726.43   11.79
   0  -4  14  767.07   13.69
   0   4 -14  702.65   12.95
   0  -4 -14  712.18   10.06
   0   4  14  709.09   12.47
   0  -4  14  717.69   12.77
   0   4 -14  763.89   13.44
   0  -4 -14  749.50   12.93
   0  -4 -14  711.01   12.63
   0   4  14  735.00   12.77
   0   4  15   79.98    4.08
   0  -4  15   86.77    4.75
   0   4 -15   76.84    4.43
   0  -4 -15   79.36    3.45
   0  -4  15   85.59    4.56
   0  -4  15   83.62    4.54
   0   4  15   82.32    4.38
   0   4 -15   91.89    4.77
   0  -4 -15   90.57    4.63
   0   4  15   84.53    4.47
   0  -4 -15   79.82    4.35
   0   4  16   51.25    3.40
   0   4 -16   50.10    3.68
   0  -4 -16   49.66    2.74
   0  -4  16   52.85    3.68
   0   4  16   54.99    3.69
   0  -4  16   54.63    3.76
   0  -4 -16   49.75    3.50
   0   4  17  188.40    6.74
   0   4 -17  178.62    7.14
   0   4 -17  177.47    5.95
   0  -4 -17  181.86    5.38
   0  -4  17  187.40    7.16
   0   4  17  198.25    7.21
   0  -4  17  185.81    7.14
   0  -4 -17  193.04    7.14
   0   4 -18 1486.05   21.20
   0   4 -18 1427.26   17.10
   0  -4 -18 1632.84   16.40
   0  -4  18 1467.14   20.65
   0  -4  18 1490.98   20.78
   0   4  18 1522.71   20.67
   0  -4 -18 1510.56   20.65
   0   4 -19  219.86    8.39
   0   4 -19  213.28    6.72
   0  -4 -19  247.46    6.49
   0  -4  19  214.77    8.11
   0   4  19  210.88    7.92
   0  -4  19  218.03    8.18
   0  -4 -19  221.76    8.16
   0   4 -20  657.75   14.88
   0  -4 -20  714.21   11.21
   0   4 -20  614.92   11.52
   0  -4  20  621.16   14.09
   0   4  20  660.78   14.39
   0  -4  20  622.46   14.20
   0  -4 -20  643.34   14.20
   0   4 -21   33.55    3.52
   0   4 -21   35.71    2.83
   0  -4 -21   36.10    2.55
   0   4  21   37.72    3.55
   0  -4  21   37.53    3.61
   0  -4  21   36.33    3.55
   0  -4 -21   38.23    3.61
   0   4 -22  431.81   12.79
   0   4 -22  407.53    9.59
   0  -4 -22  412.09    8.85
   0  -4  22  418.44   12.21
   0   4  22  426.46   12.26
   0  -4  22  425.71   12.46
   0  -4 -22  427.31   12.28
   0   4 -23    0.74    0.48
   0   4  23    1.51    0.77
   0  -4  23    0.30    0.60
   0  -4  23   -0.77    0.86
   0  -4 -23    0.39    0.62
   0   4 -24   66.32    5.28
   0  -4  24   63.91    5.08
   0   4  24   62.74    5.00
   0  -4 -24   62.84    5.00
   0   4 -24   57.49    4.79
   0   4 -25   16.34    2.67
   0   4  25   15.48    2.48
   0  -4  25   15.60    2.53
   0  -4 -25   15.66    2.57
   0   4 -25   16.73    2.76
   0   4 -26   19.28    2.94
   0  -4  26   20.16    2.96
   0   4  26   22.61    3.17
   0   4 -26   16.80    2.76
   0  -4 -26   19.90    2.92
   0   4 -27    1.64    1.13
   0   4  27    3.62    1.44
   0  -4  27    2.71    1.30
   0   4 -27    0.25    1.00
   0  -4 -27    2.29    0.97
   0   4  28   23.24    3.29
   0  -4 -28   27.66    3.76
   0   6   0 6330.16   32.42
   0  -6   0 6151.33   25.95
   0  -6   0 6217.18   28.61
   0   6   0 6423.54   33.43
   0   6   0 6295.12   26.83
   0  -6   0 6242.34   31.31
   0   6   0 6145.30   30.98
   0  -6   0 6217.08   33.85
   0   6   1   50.05    2.90
   0  -6  -1   49.58    2.30
   0   6   1   59.27    3.22
   0  -6  -1   46.23    2.43
   0  -6   1   52.20    2.48
   0   6  -1   53.11    2.52
   0   6   1   55.33    2.50
   0  -6   1   48.63    2.78
   0  -6  -1   49.29    2.76
   0   6   1   44.54    2.64
   0   6  -1   46.55    2.73
   0  -6  -1   49.14    2.97
   0  -6   1   47.64    2.96
   0  -6   2 3050.47   19.67
   0   6   2 3105.73   18.37
   0   6  -2 3021.08   19.49
   0  -6  -2 2982.64   19.83
   0   6   2 3017.28   22.13
   0   6   2 3172.02   23.40
   0  -6  -2 3064.90   17.70
   0  -6  -2 3099.91   21.66
   0   6  -2 3031.90   22.20
   0   6   2 3057.86   21.85
   0  -6  -2 2992.15   21.83
   0  -6   2 3033.30   23.89
   0  -6   2 3051.14   22.06
   0   6  -3    2.64    0.63
   0  -6   3    3.89    0.76
   0   6   3    4.20    0.70
   0   6   3    4.03    0.83
   0   6   3    3.38    0.83
   0  -6  -3    4.52    0.84
   0  -6   3    3.66    0.83
   0   6  -3    4.61    0.90
   0  -6  -3    3.78    0.79
   0   6   3    4.17    0.84
   0   6   4  361.81    6.26
   0   6  -4  349.20    7.04
   0  -6   4  362.53    7.27
   0   6   4  345.22    7.18
   0   6   4  364.19    7.92
   0  -6  -4  367.76    7.60
   0  -6   4  349.46    8.22
   0   6   4  362.65    7.65
   0   6  -4  347.16    7.74
   0  -6  -4  358.08    7.67
   0  -6   5  196.49    5.52
   0   6  -5  181.50    5.26
   0   6   5  192.85    5.77
   0   6   5  187.59    5.17
   0   6   5  192.87    4.64
   0   6   5  187.89    5.07
   0  -6   5  192.39    6.14
   0  -6  -5  193.80    5.61
   0   6   5  186.92    5.59
   0  -6  -5  182.77    5.56
   0   6  -5  184.11    6.19
   0   6  -5  187.34    5.75
   0  -6   6    6.03    1.04
   0   6  -6    5.21    0.90
   0   6   6    6.35    0.95
   0   6   6    6.95    0.91
   0   6   6    8.23    1.20
   0   6   6    5.96    0.90
   0  -6   6    6.95    1.27
   0  -6  -6    5.52    0.97
   0   6  -6    6.30    1.20
   0   6   6    7.49    1.18
   0   6  -6    5.79    1.07
   0  -6  -6    6.91    1.13
   0  -6   7   34.39    2.46
   0   6  -7   30.84    2.34
   0   6   7   30.36    2.02
   0   6   7   29.75    2.13
   0   6   7   31.90    1.97
   0   6   7   30.01    2.29
   0  -6  -7   30.28    2.34
   0   6   7   30.63    2.32
   0  -6   7   31.00    2.53
   0  -6  -7   30.24    2.36
   0   6  -7   27.95    2.52
   0   6   7   28.83    2.29
   0   6  -7   30.91    2.46
   0  -6   8   36.26    2.62
   0   6  -8   32.26    2.48
   0   6   8   29.06    1.94
   0   6   8   30.95    2.04
   0   6   8   31.40    2.23
   0   6   8   36.26    2.50
   0  -6  -8   29.73    2.34
   0  -6   8   28.54    2.52
   0   6   8   32.49    2.46
   0   6  -8   30.66    2.48
   0   6   8   35.13    2.60
   0  -6  -8   31.37    2.46
   0   6  -8   31.91    2.67
   0   6  -9  227.53    6.74
   0  -6   9  240.47    7.02
   0   6   9  223.71    6.10
   0   6   9  241.76    6.49
   0   6   9  214.61    5.14
   0  -6  -9  237.13    6.81
   0  -6   9  227.21    7.11
   0   6   9  220.73    6.60
   0  -6  -9  227.38    6.74
   0   6   9  230.02    6.79
   0   6  -9  243.50    7.53
   0   6 -10  130.43    5.24
   0  -6  10  138.86    5.49
   0   6  10  129.08    4.75
   0   6  10  129.69    3.89
   0  -6  10  126.46    5.45
   0  -6 -10  134.34    5.28
   0   6  10  130.63    5.19
   0   6 -10  147.51    5.98
   0   6  10  133.42    5.30
   0  -6 -10  131.01    5.24
   0   6 -11  283.89    8.00
   0  -6  11  306.53    8.43
   0   6  11  295.87    7.27
   0   6  11  282.26    5.54
   0  -6 -11  285.70    7.18
   0   6  11  291.02    7.95
   0   6 -11  307.98    8.83
   0  -6  11  285.09    8.30
   0  -6 -11  301.22    8.09
   0  -6 -11  289.91    8.00
   0   6  11  300.11    8.15
   0   6  12   85.13    3.82
   0  -6  12   91.57    4.71
   0   6 -12   80.29    4.38
   0  -6 -12   82.84    3.92
   0   6  12   80.73    3.84
   0   6  12   84.64    2.94
   0   6  12   92.45    4.59
   0  -6  12   91.59    4.82
   0  -6 -12   95.42    4.66
   0  -6 -12   87.96    4.50
   0   6  12   89.34    4.59
   0  -6  13    9.45    0.58
   0   6  13    9.69    1.37
   0   6 -13    8.46    1.48
   0  -6  13   10.59    1.71
   0  -6 -13    9.24    1.30
   0   6  13    9.68    1.37
   0   6  13   10.40    1.65
   0  -6 -13    9.57    1.60
   0  -6  13    9.45    1.67
   0  -6 -13   10.20    1.65
   0   6  13   10.78    1.65
   0   6 -14  305.16    9.10
   0   6  14  295.22    7.67
   0   6  14  318.74    7.72
   0   6 -14  312.46    8.76
   0  -6 -14  305.62    7.69
   0   6  14  311.42    8.92
   0  -6  14  317.58    9.36
   0  -6 -14  311.67    8.94
   0   6 -15   53.11    3.89
   0   6  15   50.53    3.29
   0   6  15   57.56    3.31
   0  -6 -15   53.64    3.29
   0   6  15   56.40    3.91
   0  -6  15   53.64    3.94
   0  -6 -15   51.93    3.73
   0   6  16  111.47    5.05
   0   6 -16  109.48    5.72
   0  -6 -16  111.85    4.75
   0   6  16  111.54    5.65
   0  -6  16  110.18    5.81
   0  -6 -16  110.02    5.61
   0   6  17  272.63    8.16
   0   6 -17  264.89    9.20
   0  -6 -17  263.64    7.39
   0  -6  17  262.11    9.11
   0   6  17  260.81    8.85
   0  -6 -17  269.34    8.97
   0   6 -18  259.58    9.36
   0  -6 -18  260.72    7.42
   0  -6  18  249.69    9.11
   0   6  18  263.17    9.11
   0  -6 -18  258.79    9.06
   0   6 -19    4.36    1.21
   0  -6 -19    4.45    1.04
   0  -6  19    4.61    1.16
   0   6  19    6.79    1.58
   0  -6  19    5.37    1.41
   0  -6 -19    5.66    1.50
   0   6 -20  547.55   14.32
   0  -6 -20  538.21   10.89
   0  -6  20  563.95   14.32
   0  -6  20  534.78   13.95
   0   6  20  559.45   13.93
   0  -6 -20  552.22   13.88
   0   6 -21    3.41    1.21
   0   6  21    3.06    1.09
   0  -6  21    3.80    1.23
   0  -6  21    4.05    1.35
   0  -6 -21    3.36    1.20
   0   6 -22  355.88   12.12
   0   6  22  373.09   11.96
   0  -6  22  354.91   11.91
   0  -6  22  375.48   12.28
   0  -6 -22  363.59   11.88
   0   6 -23   84.04    6.05
   0  -6  23   79.89    5.79
   0  -6  23   87.38    6.12
   0   6  23   77.39    5.59
   0  -6 -23   83.09    5.81
   0   6 -24  183.68    9.17
   0  -6  24  189.75    9.13
   0   6  24  194.80    9.06
   0  -6  24  195.30    9.29
   0  -6 -24  191.23    9.06
   0   6 -25    1.48    1.20
   0  -6  25    0.56    0.58
   0   6  25   -0.11    0.77
   0  -6  25    0.58    0.65
   0  -6 -25   -0.55    0.88
   0   6 -26   36.24    4.29
   0  -6  26   35.57    4.12
   0   6  26   36.50    4.13
   0  -6  26   37.86    4.24
   0  -6 -26   34.36    4.08
   0  -8   0  179.08    5.72
   0   8   0  189.72    6.61
   0  -8   0  189.46    5.31
   0   8   0  198.64    6.95
   0   8   0  195.33    5.49
   0  -8   0  187.41    6.95
   0   8   0  188.12    6.37
   0  -8   0  177.26    6.21
   0   8   1    2.38    0.65
   0   8  -1    1.09    0.42
   0  -8   1    1.16    0.53
   0   8   1    1.74    0.67
   0   8   1    0.84    0.58
   0   8  -1    2.55    0.86
   0   8  -1    1.62    0.69
   0  -8   1    2.09    0.56
   0  -8  -1    1.16    0.44
   0  -8  -1    1.27    0.51
   0  -8  -1    1.30    0.42
   0  -8   1    1.83    0.76
   0   8   1    1.69    0.56
   0  -8   1    1.20    0.42
   0   8  -1    1.53    0.60
   0  -8  -1    2.45    0.76
   0  -8  -1    0.26    0.40
   0   8   2  225.61    5.77
   0   8  -2  211.60    5.91
   0   8  -2  227.07    7.44
   0   8   2  213.17    7.16
   0   8  -2  220.79    7.30
   0  -8  -2  211.32    6.16
   0   8   2  222.44    7.02
   0  -8   2  216.53    5.93
   0  -8   2  202.42    6.16
   0  -8  -2  218.34    6.70
   0  -8   2  215.63    7.48
   0  -8  -2  216.35    7.44
   0   8   2  219.33    6.86
   0   8  -2  212.04    6.83
   0  -8  -2  214.14    6.81
   0  -8   3  127.16    4.68
   0   8   3  124.38    4.29
   0   8  -3  121.83    4.59
   0   8  -3  134.35    5.74
   0   8   3  130.36    5.30
   0   8   3  127.21    5.49
   0  -8   3  125.38    5.68
   0  -8  -3  129.02    5.21
   0  -8  -3  127.69    5.26
   0   8  -3  124.77    5.31
   0   8   3  123.92    5.21
   0   8   4  834.42   10.98
   0  -8   4  808.84   12.14
   0   8  -4  788.85   11.96
   0   8   4  808.77   13.05
   0   8   4  839.47   14.04
   0  -8   4  774.04   14.23
   0  -8  -4  822.75   13.19
   0  -8  -4  772.23   13.12
   0   8   4  801.52   13.28
   0   8  -4  802.63   13.55
   0  -8   5   47.54    3.03
   0   8   5   49.22    2.69
   0   8  -5   45.14    2.94
   0   8   5   47.34    3.13
   0   8   5   48.12    3.38
   0  -8   5   44.84    3.50
   0  -8  -5   50.35    3.31
   0   8   5   47.73    3.27
   0   8  -5   50.54    3.48
   0  -8  -5   48.20    3.33
   0  -8   6  307.17    7.93
   0   8   6  317.53    6.91
   0   8  -6  295.36    7.71
   0   8   6  296.10    7.72
   0   8   6  308.13    8.50
   0  -8  -6  304.00    8.16
   0  -8   6  293.11    8.95
   0   8   6  308.54    8.41
   0  -8  -6  302.58    8.37
   0   8  -6  309.54    8.64
   0   8   7   84.34    3.61
   0   8  -7   78.53    4.10
   0  -8   7   79.33    4.15
   0   8   7   74.26    4.17
   0   8   7   72.57    3.76
   0  -8   7   73.70    4.49
   0  -8  -7   76.56    4.20
   0   8  -7   75.81    4.33
   0   8   7   73.24    4.15
   0  -8  -7   72.16    4.19
   0   8  -8   94.79    4.63
   0  -8   8  102.41    4.86
   0   8   8   97.02    4.36
   0   8   8   97.43    4.28
   0   8   8  101.91    4.01
   0   8   8  101.54    4.91
   0  -8  -8  100.24    4.87
   0  -8   8   95.25    5.19
   0   8  -8   96.69    5.00
   0   8   8  101.60    4.98
   0  -8  -8   97.23    4.86
   0  -8   9    0.42    0.30
   0   8  -9    0.67    0.33
   0   8   9    0.11    0.32
   0   8   9    0.26    0.35
   0   8   9    0.28    0.33
   0   8   9    0.07    0.44
   0  -8  -9    0.62    0.48
   0  -8   9   -0.49    0.74
   0   8   9   -0.07    0.53
   0  -8  -9    0.55    0.39
   0   8 -10    1.04    0.65
   0  -8  10    0.14    0.28
   0   8  10    0.25    0.37
   0   8  10    0.99    0.60
   0   8  10   -0.33    0.55
   0   8  10    0.46    0.37
   0  -8  10    0.84    0.62
   0  -8 -10    0.81    0.46
   0   8 -11    8.74    1.50
   0   8  11    8.41    1.44
   0   8  11    8.41    1.20
   0   8  11    9.41    1.62
   0   8  11    8.76    1.27
   0  -8  11    7.27    1.53
   0  -8 -11    7.72    1.51
   0   8 -12   92.22    5.03
   0   8  12   87.31    3.76
   0   8  12   96.11    4.82
   0   8  12   96.43    4.28
   0   8  12   96.92    4.77
   0  -8  12   91.50    5.38
   0   8  12   86.73    4.94
   0  -8 -12   88.61    5.00
   0   8  13   26.28    2.29
   0   8 -13   25.07    2.69
   0   8  13   27.69    2.62
   0   8  13   26.09    1.99
   0   8  13   27.74    2.62
   0   8  13   28.34    2.38
   0   8  13   26.86    2.78
   0  -8  13   27.51    2.99
   0  -8 -13   26.53    2.78
   0   8 -14   15.36    2.16
   0   8  14   13.09    1.71
   0   8  14   12.10    1.65
   0   8  14   15.92    1.50
   0   8  14   14.97    1.95
   0   8  14   14.55    1.90
   0  -8  14   15.39    2.32
   0   8  14   16.19    2.27
   0  -8 -14   14.67    2.08
   0  -8  14   14.18    1.02
   0  -8  15   47.98    1.48
   0   8  15   44.63    3.18
   0   8 -15   42.75    3.73
   0   8  15   44.51    3.38
   0   8  15   49.21    3.66
   0  -8  15   47.73    4.13
   0   8  15   45.30    3.80
   0  -8 -15   46.78    3.89
   0  -8  15   46.06    1.50
   0   8  16  293.94    8.39
   0   8 -16  288.43    9.92
   0   8  16  300.94    8.78
   0   8  16  302.12    9.22
   0  -8  16  297.02   10.36
   0   8  16  298.30    9.90
   0  -8 -16  295.64    9.87
   0   8 -17   30.10    3.33
   0   8  17   30.93    3.04
   0   8  17   29.06    2.73
   0   8  17   29.64    3.17
   0  -8  17   32.14    3.47
   0  -8 -17   29.63    3.18
   0   8 -18  180.27    8.23
   0   8  18  179.64    8.06
   0  -8  18  181.01    8.44
   0  -8 -18  174.11    7.93
   0   8 -19   -0.95    1.18
   0   8  19    1.76    0.67
   0  -8  19    1.37    0.90
   0  -8 -19    0.65    0.63
   0   8 -20  396.13   12.88
   0   8  20  409.66   12.74
   0  -8  20  418.90   13.28
   0  -8 -20  417.00   12.86
   0   8 -21    3.52    1.14
   0  -8  21    3.98    1.32
   0   8  21    4.20    1.37
   0  -8  21    4.96    1.53
   0  -8 -21    3.48    1.48
   0   8 -22   45.28    4.56
   0   8  22   47.41    4.56
   0  -8  22   47.08    4.57
   0  -8  22   48.82    4.79
   0  -8 -22   42.38    4.26
   0   8 -23   14.60    2.69
   0  -8  23   17.36    2.89
   0   8  23   16.96    2.85
   0  -8  23   16.36    2.78
   0  -8 -23   16.41    2.71
   0   8 -24  249.48   11.17
   0   8  24  243.68   10.71
   0  -8  24  252.74   11.24
   0  -8  24  250.85   11.03
   0  -8 -24  252.67   10.94
   0 -10   0  651.72   11.01
   0  10   0  685.50   14.74
   0 -10   0  640.42   12.21
   0  10   0  681.89   11.49
   0 -10   0  649.24   13.53
   0 -10   0  654.55   14.78
   0 -10  -1  163.42    6.16
   0  10  -1  165.32    7.25
   0 -10   1  164.02    5.63
   0  10   1  166.00    7.23
   0 -10   1  158.37    6.12
   0 -10  -1  167.32    5.49
   0  10   1  167.89    5.68
   0  10  -1  164.28    5.74
   0 -10  -1  164.63    6.81
   0 -10  -1  164.70    7.42
   0 -10   1  172.79    7.58
   0 -10  -2  325.83    8.62
   0 -10   2  327.06    8.90
   0 -10   2  334.81    8.20
   0  10  -2  353.22   10.70
   0  10   2  381.64   10.89
   0  10   2  350.69    8.15
   0  10  -2  341.95    8.43
   0 -10  -2  334.75    9.75
   0 -10   2  329.72   10.52
   0 -10  -2  341.51   10.68
   0  10  -3   63.61    3.69
   0  10   3   59.94    3.34
   0  10  -3   61.31    4.49
   0  10   3   63.10    4.43
   0 -10   3   62.58    3.61
   0 -10   3   59.64    3.84
   0 -10   3   57.23    4.35
   0 -10  -3   60.75    4.15
   0 -10  -3   57.42    4.35
   0  10   4  146.35    5.19
   0  10  -4  131.91    5.44
   0  10  -4  144.95    6.91
   0 -10   4  125.80    5.63
   0  10   4  146.62    6.77
   0 -10   4  137.49    5.49
   0 -10   4  133.49    6.72
   0 -10  -4  136.64    6.25
   0 -10  -4  142.99    7.00
   0  10   5    3.03    0.84
   0  10  -5    3.24    0.93
   0  10   5    3.59    0.99
   0  10  -5    3.15    0.86
   0 -10   5    2.27    0.55
   0 -10   5    4.01    1.30
   0 -10  -5    0.97    0.46
   0 -10  -5    2.25    0.79
   0  10  -6  131.93    5.70
   0  10   6  139.07    5.07
   0 -10   6  136.92    5.77
   0  10   6  142.04    6.61
   0 -10   6  128.04    6.70
   0 -10  -6  132.53    6.25
   0 -10   7   24.63    2.55
   0  10  -7   23.73    2.50
   0  10   7   27.67    2.29
   0  10   7   27.71    2.92
   0 -10   7   24.72    2.97
   0 -10  -7   25.86    2.80
   0  10   8  104.98    4.47
   0  10  -8   95.56    5.03
   0  10   8   99.52    5.54
   0 -10   8   94.95    5.88
   0 -10  -8   99.49    5.54
   0  10   9  122.06    4.91
   0  10  -9  113.14    5.59
   0  10   9  118.29    6.09
   0 -10   9  107.26    6.32
   0 -10  -9  109.83    5.88
   0  10 -10   17.05    2.29
   0  10  10   20.65    2.08
   0  10  10   15.27    1.97
   0  10  10   22.33    2.66
   0 -10  10   14.83    2.39
   0 -10 -10   17.49    2.39
   0  10 -11    4.82    1.14
   0  10  11    7.00    1.60
   0  10  11    7.53    1.34
   0  10  11    7.95    1.34
   0 -10  11    5.88    1.32
   0 -10 -11    8.00    1.64
   0  10 -12   64.20    4.56
   0  10  12   60.89    4.05
   0  10  12   60.54    3.73
   0  10  12   64.65    3.76
   0  10  12   58.86    4.31
   0 -10  12   63.02    5.03
   0 -10 -12   60.29    4.50
   0  10 -13   43.86    3.82
   0  10  13   39.74    3.59
   0  10  13   45.58    3.22
   0  10  13   41.96    3.47
   0 -10  13   43.56    4.20
   0 -10 -13   42.36    3.92
   0  10 -14  246.81    9.29
   0  10  14  249.27    8.88
   0  10  14  263.85    7.83
   0  10  14  267.34    8.83
   0 -10  14  261.80   10.38
   0 -10 -14  256.25    9.69
   0  10 -15   24.17    3.01
   0  10  15   23.96    2.43
   0  10  15   25.61    2.81
   0  10  15   21.96    2.71
   0 -10  15   26.42    3.33
   0 -10 -15   24.89    3.10
   0  10 -16  165.72    7.99
   0  10  16  170.16    7.46
   0  10  16  180.71    6.81
   0  10  16  166.55    7.25
   0 -10  16  177.12    8.80
   0 -10 -16  164.09    8.00
   0  10 -17   61.31    5.00
   0  10  17   61.82    4.50
   0  10  17   62.58    4.56
   0  10  17   67.10    4.24
   0 -10  17   65.36    5.44
   0 -10 -17   65.09    5.19
   0  10 -18  239.82   10.08
   0  10  18  249.80    9.04
   0  10  18  253.76    8.39
   0  10  18  246.97    9.22
   0 -10  18  245.19   10.68
   0 -10 -18  242.62   10.13
   0  10 -19   11.40    2.22
   0  10  19    7.53    1.67
   0  10  19   10.56    1.99
   0  10  19    8.97    2.13
   0 -10  19    9.34    2.15
   0 -10 -19    7.83    1.95
   0  10 -20  132.86    7.83
   0  10  20  125.22    6.84
   0  10  20  140.72    7.90
   0 -10  20  128.85    8.08
   0 -10 -20  136.40    7.81
   0  10 -21    6.81    1.88
   0  10  21    6.39    1.67
   0  10  21    7.32    1.81
   0 -10 -21    6.02    1.78
   0  10 -22   80.94    6.44
   0  10  22   86.27    5.88
   0  10  22   80.86    6.28
   0 -10 -22   78.99    6.21
   0  10  23    0.69    0.83
   0  12   0   71.99    5.38
   0  12   0   74.05    4.15
   0 -12   0   67.15    5.31
   0  12   1    0.91    0.65
   0  12  -1   -1.23    1.20
   0  12   1   -0.19    0.37
   0  12  -1    0.25    0.39
   0 -12   1   -1.14    1.07
   0 -12  -1   -0.21    0.70
   0  12  -2  131.17    5.68
   0  12   2  132.84    5.44
   0  12   2  134.99    7.32
   0  12  -2  129.92    7.37
   0 -12   2  125.45    7.39
   0 -12  -2  130.98    7.48
   0 -12  -2  124.82    6.70
   0  12  -3   11.38    2.20
   0  12   3   13.92    2.34
   0  12   3   14.11    1.78
   0  12  -3   12.24    1.76
   0 -12  -3   11.05    1.99
   0 -12   3   13.00    2.39
   0 -12  -3   11.08    2.18
   0  12  -4   90.71    4.91
   0  12   4   96.79    4.61
   0  12  -4   92.94    6.28
   0  12   4   94.24    6.10
   0 -12   4   84.51    6.05
   0 -12  -4   89.86    5.74
   0 -12  -4   94.47    6.39
   0  12  -5   25.49    2.64
   0  12   5   27.29    2.41
   0  12  -5   26.27    3.34
   0  12   5   27.39    3.31
   0 -12   5   26.92    3.38
   0 -12  -5   27.20    3.34
   0 -12  -5   25.61    3.03
   0  12  -6   72.71    4.61
   0  12   6   76.90    4.08
   0  12   6   70.78    5.30
   0  12  -6   79.55    5.89
   0 -12   6   63.33    5.26
   0 -12  -6   69.10    5.07
   0 -12  -6   68.68    5.49
   0  12  -7    4.42    1.14
   0  12   7    6.49    1.20
   0  12  -7    6.49    1.76
   0  12   7    6.93    1.74
   0 -12   7    7.53    1.88
   0 -12  -7    5.98    1.67
   0 -12  -7    6.25    1.60
   0  12  -8   15.97    2.30
   0  12   8   13.51    2.34
   0  12  -8   11.44    2.11
   0 -12   8   15.02    2.57
   0 -12  -8   13.44    2.55
   0 -12  -8   14.71    2.45
   0  12  -9    5.23    1.27
   0  12   9    7.86    1.72
   0  12  -9    6.14    1.78
   0 -12   9    6.00    1.69
   0 -12  -9    4.31    1.35
   0  12 -10    2.34    1.09
   0  12 -10    2.57    1.35
   0  12  10    0.26    0.62
   0 -12  10   -0.21    0.76
   0 -12 -10    0.79    0.60
   0  12 -11   39.83    3.75
   0  12 -11   43.28    4.42
   0  12  11   36.79    3.82
   0 -12  11   44.77    4.63
   0 -12 -11   39.90    4.15
   0  12 -12    2.99    1.00
   0  12  12    3.68    1.04
   0 -12  12    3.87    1.50
   0 -12 -12    1.28    0.56
   0  12 -13   30.17    3.36
   0  12  13   27.16    3.31
   0 -12  13   29.87    3.80
   0 -12 -13   28.36    3.52
   0  12 -14   32.42    3.68
   0  12  14   35.27    3.82
   0 -12  14   35.94    4.26
   0 -12 -14   32.14    3.76
   0  12  15   13.92    2.53
   0  12 -15   14.69    2.46
   0 -12 -15   15.48    2.67
   0  12  16   13.55    2.48
   0  12 -16   16.03    2.60
   0 -12 -16   12.95    2.43
   0  12  17    0.65    0.53
   0  12 -17    1.14    0.91
   0 -12 -17    1.86    1.32
   0  12  18   94.93    6.21
   0  12 -18   96.32    6.77
   0 -12 -18   85.94    6.42
   0  12 -19    9.89    2.13
   0  14   2   76.42    6.14
   0  14   3   -1.11    0.99
   0  14   4  174.82    9.22
   0 -14  -4  134.25    7.74
   0  14   5   14.41    2.76
   0 -14  -5   13.72    2.55
   0  14   6   46.00    4.73
   0 -14  -6   41.50    4.40
   0  14   7   20.00    3.17
   0 -14  -7   18.07    2.87
   0 -14  -8    0.58    0.58
   0 -14  -9    9.08    2.20
   0 -14 -10    1.71    0.95
   0 -14 -11    3.01    1.57
   0 -14 -12   18.81    3.03
  -1  -1  29   32.41    4.03
  -1   1  29   37.37    4.26
   1  -1 -29   30.35    3.87
   1   1 -29   34.87    4.15
  -1  -1  28  230.85   10.27
  -1   1  28  232.86   10.26
   1   1 -28  228.28   10.24
   1  -1 -28  230.92   10.24
  -1  -1  27    1.71    0.99
  -1   1  27    5.75    1.83
   1   1 -27    1.28    0.95
   1  -1 -27    4.84    1.67
  -1   1  26  254.95   10.17
  -1  -1  26  247.65   10.06
   1   1 -26  256.64   10.29
   1  -1 -26  259.35   10.31
   1   1 -25    6.88    1.83
  -1   1  25    8.67    2.02
  -1  -1  25    8.11    1.94
   1   1 -25    7.71    1.71
   1  -1 -25    8.50    1.88
   1   1 -24  321.82   10.89
   1  -1 -24  271.98    7.51
   1  -1 -24  299.37    7.81
  -1  -1  24  317.00   10.78
  -1   1  24  321.40   10.78
   1   1 -24  308.36   10.61
   1  -1 -24  322.58   10.82
   1  -1 -23    8.80    1.43
   1   1 -23    7.76    1.07
   1   1 -23    6.90    1.78
   1   1 -23    7.37    1.00
   1  -1 -23    8.44    1.43
  -1  -1  23    7.95    1.83
  -1   1  23    9.85    1.92
   1  -1 -23    9.80    1.99
   1   1 -23    7.62    1.79
   1  -1 -22  712.77   11.35
   1   1 -22  687.15   15.18
   1   1 -22  721.49    8.87
   1  -1 -22  692.50   11.35
   1   1 -22  720.98    9.17
  -1  -1  22  713.89   15.18
  -1   1  22  728.12   15.38
   1  -1 -22  715.91   15.18
   1   1 -22  694.24   14.95
   1   1 -21   14.16    2.18
   1   1 -21   11.96    1.20
   1  -1 -21   14.27    1.76
   1   1 -21   12.07    1.21
  -1  -1  21   12.47    2.15
  -1   1  21   15.38    2.38
   1  -1 -21   13.70    1.64
   1  -1 -21   15.45    2.34
   1   1 -21   11.26    1.94
   1   1 -20  626.17   13.55
   1   1 -20  628.76    8.06
   1   1 -20  626.91    8.50
   1  -1 -20  611.48   10.10
  -1  -1  20  627.12   13.48
  -1   1  20  649.63   13.62
   1  -1 -20  629.13   13.42
   1  -1 -20  594.10    9.98
   1   1 -20  632.19   13.51
   1   1 -19    3.27    1.02
   1  -1 -19    5.66    1.04
   1   1 -19    3.36    0.62
   1  -1 -19    5.26    1.04
   1  -1 -19    3.73    0.37
  -1   1  19    4.89    1.21
  -1  -1  19    2.53    0.83
   1   1 -19    2.04    0.65
   1  -1 -19    4.42    1.25
   1   1 -18  122.04    3.36
  -1   1  18  126.77    5.65
   1   1 -18  120.63    5.58
   1  -1 -18  119.35    4.20
   1  -1 -18  128.09    2.16
  -1   1  18  126.67    5.61
   1  -1 -18  129.87    5.54
   1   1 -18  134.27    5.70
  -1  -1  18  119.75    5.51
   1  -1 -18  117.54    4.28
   1   1 -18  119.37    5.49
   1  -1 -18  127.74    5.65
   1  -1 -17   27.85    2.55
   1   1 -17   27.53    1.57
  -1   1  17   27.57    2.57
  -1  -1  17   28.87    2.73
   1   1 -17   29.12    2.69
  -1   1  17   27.80    2.55
   1  -1 -17   28.59    2.50
   1   1 -17   28.48    2.50
  -1  -1  17   27.83    2.57
   1  -1 -17   26.28    1.97
   1   1 -17   32.70    2.76
   1  -1 -17   27.02    2.55
  -1   1  16   33.94    2.76
   1   1 -16   33.11    1.65
   1  -1 -16   35.82    2.74
   1   1 -16   33.87    2.81
  -1  -1  16   34.46    2.87
   1  -1 -16   36.89    2.78
  -1  -1  16   38.35    2.92
  -1   1  16   34.36    2.74
   1   1 -16   34.64    2.69
   1  -1 -16   35.48    2.83
   1  -1 -16   33.30    2.69
   1  -1 -16   32.35    2.15
   1   1 -15  473.15    9.99
   1   1 -15  442.03    5.84
  -1   1  15  479.36    9.85
  -1  -1  15  492.40   10.34
   1  -1 -15  476.46    9.59
   1  -1 -15  493.61   10.06
  -1   1  15  482.02    9.80
  -1  -1  15  459.34    9.73
   1   1 -15  484.80    9.75
   1  -1 -15  487.69    9.73
   1  -1 -15  465.15    7.81
   1  -1 -15  491.61    9.89
  -1  -1  14  315.28    7.97
   1   1 -14  302.65    4.63
   1  -1 -14  310.83    7.39
  -1   1  14  297.70    7.46
   1   1 -14  302.08    7.71
   1   1 -14  314.57    7.51
   1  -1 -14  314.19    7.44
  -1  -1  14  288.04    7.14
  -1   1  14  302.80    7.42
  -1  -1  14  291.69    7.48
   1  -1 -14  310.33    7.64
   1  -1 -14  305.25    7.49
   1  -1 -14  291.19    6.00
  -1   1  13  347.44    7.72
   1   1 -13  347.49    4.77
  -1  -1  13  366.60    8.20
   1  -1 -13  355.81    7.58
   1   1 -13  361.28    8.08
   1  -1 -13  369.71    7.67
  -1  -1  13  350.09    7.56
   1  -1 -13  360.51    7.93
  -1   1  13  346.56    7.65
   1   1 -13  360.70    7.72
  -1  -1  13  354.39    7.92
   1  -1 -13  342.74    6.35
   1  -1 -13  356.92    7.78
   1  -1 -12  471.04    8.39
  -1  -1  12  493.83    9.13
  -1   1  12  471.41    8.59
   1   1 -12  479.96    8.94
   1   1 -12  469.20    5.31
   1  -1 -12  484.50    8.43
  -1  -1  12  476.97    8.44
  -1  -1  12  481.11    8.83
   1   1 -12  483.60    8.51
   1  -1 -12  472.29    8.69
  -1   1  12  491.12    8.71
   1  -1 -12  461.58    7.14
   1  -1 -12  481.51    8.60
  -1  -1  11  194.61    5.44
  -1   1  11  190.19    5.15
   1   1 -11  187.38    3.18
   1   1 -11  189.24    5.37
   1  -1 -11  198.32    5.12
  -1  -1  11  185.51    5.03
   1   1 -11  190.81    5.12
  -1  -1  11  186.39    5.24
   1  -1 -11  185.13    5.01
   1  -1 -11  191.67    5.26
  -1   1  11  195.82    5.33
   1  -1 -11  178.18    4.38
   1  -1 -11  200.19    5.31
  -1  -1  10 2101.95   17.17
   1   1 -10 2072.10    9.99
   1   1 -10 2126.30   17.03
  -1   1  10 2103.09   16.13
   1  -1 -10 2187.77   16.10
   1   1 -10 2111.73   16.27
  -1  -1  10 2091.75   16.06
  -1   1  10 2116.59   16.54
   1  -1 -10 2120.76   16.57
  -1  -1  10 2110.11   16.82
   1  -1 -10 2190.09   16.52
   1   1  -9  724.87    5.58
  -1  -1   9  739.07    9.68
   1  -1  -9  792.00    9.13
  -1   1   9  766.86    9.15
   1   1  -9  766.83    9.75
  -1  -1   9  761.41    9.50
   1  -1  -9  750.45    9.34
  -1   1   9  782.89    9.52
  -1  -1   9  747.90    9.08
   1   1  -9  746.51    9.17
   1  -1  -9  778.10    9.39
  -1   1   8 8873.55   29.06
   1   1  -8 9135.29   31.75
   1  -1  -8 9143.42   29.01
  -1  -1   8 9223.66   31.93
  -1  -1   8 8940.22   29.59
   1   1  -8 9163.39   29.89
   1  -1  -8 9198.89   30.42
  -1   1   8 9322.72   30.54
   1  -1  -8 9166.62   30.15
   1  -1  -7 2612.86   14.30
   1   1  -7 2653.73   16.08
  -1   1   7 2498.59   14.20
  -1  -1   7 2589.02   15.87
   1  -1  -7 2439.53   12.39
  -1  -1   7 2569.56   14.78
   1  -1  -7 2429.10   14.81
  -1   1   7 2551.78   14.80
   1   1  -7 2536.24   14.76
   1  -1  -7 2551.69   14.94
  -1  -1   7 2533.11    9.22
   1   1  -6 9863.71   29.08
  -1  -1   6 9951.31   29.12
  -1  -1   6 9716.38   16.64
  -1   1   6 9776.49   25.60
   1  -1  -6 9960.40   25.47
   1  -1  -6 9826.68   23.47
  -1  -1   6 9744.35   26.81
   1  -1  -6 9788.65   27.04
   1   1  -6 9857.10   27.04
  -1   1   6 9632.63   26.58
   1  -1  -6 9999.00   27.23
   1   1  -5   12.51    0.97
  -1  -1   5   12.83    0.97
  -1   1   5   11.98    0.81
   1   1  -5    9.87    0.55
  -1  -1   5   11.72    0.56
   1  -1  -5   13.19    0.84
   1  -1  -5   12.16    0.79
   1   1  -5   11.70    0.86
  -1  -1   5   13.05    0.93
   1  -1  -5   12.77    0.91
  -1   1   5   14.34    0.95
   1  -1  -5   16.01    0.99
  -1   1   5   11.61    0.84
   1   1  -4 5171.64   17.70
  -1  -1   4 5186.03   17.65
  -1   1   4 5226.68   14.51
  -1   1   4 5264.98   15.25
   1   1  -4 5213.33   16.45
   1  -1  -4 5311.30   15.97
  -1  -1   4 5375.74   16.57
   1  -1  -4 5402.63   16.13
  -1   1   4 5224.41   15.90
  -1  -1   3   92.41    2.13
  -1   1   3   92.33    1.58
   1   1  -3   90.99    2.09
  -1   1   3   90.88    1.88
   1  -1  -3   91.76    1.50
   1  -1  -3   94.09    1.88
  -1  -1   3   93.24    1.97
   1   1  -3   92.33    1.99
  -1   1   3   93.59    1.83
   1  -1  -3   94.67    1.85
  -1   1   3   92.22    1.83
   1  -1  -3   91.43    1.83
  -1  -1   2  279.32    3.31
   1   1  -2  285.74    3.33
   1  -1  -2  292.76    3.17
  -1   1   2  269.48    3.04
  -1   1   2  277.96    2.67
  -1   1   2  277.52    2.62
  -1  -1   2  292.85    3.20
   1   1  -2  286.57    3.18
  -1   1   2  279.81    2.69
   1  -1  -2  284.03    2.69
  -1   1   1  134.21    1.94
   1  -1  -1  135.74    2.09
   1   1  -1  129.78    2.04
  -1  -1   1  133.09    2.08
   1   1   0  159.88    2.15
  -1   1   0  159.18    2.23
   1  -1   1  173.90    2.20
  -1   1  -1  178.69    2.20
  -1   1  -1  175.70    2.50
   1  -1   1  177.18    2.50
  -1   1  -1  175.64    2.52
   1  -1   1  174.66    2.50
  -1  -1  -1  173.55    2.55
   1   1   1  178.95    2.57
  -1  -1  -1  175.80    2.57
   1   1   1  172.04    2.53
  -1   1  -2    2.13    0.33
   1  -1   2    1.78    0.30
  -1   1  -2    1.48    0.30
  -1  -1  -2    1.94    0.25
   1   1   2    1.72    0.21
  -1  -1  -2    2.92    0.37
  -1   1  -2    1.48    0.28
   1   1   2    2.16    0.37
   1  -1   2    2.11    0.35
  -1  -1  -2    1.97    0.28
   1   1   2    2.27    0.35
  -1   1  -3   36.17    1.41
   1  -1   3   36.22    1.39
  -1   1  -3   34.11    1.23
  -1  -1  -3   39.25    1.02
   1   1   3   35.29    0.95
   1   1   3   36.42    1.41
   1  -1   3   32.81    1.39
  -1  -1  -3   33.92    1.37
  -1   1  -3   34.24    1.41
  -1  -1  -3   35.22    1.43
   1   1   3   35.40    1.43
   1  -1   4 2199.24   12.17
  -1   1  -4 2207.59   12.28
   1   1   4 2216.35    8.11
  -1   1  -4 2158.77   10.08
  -1  -1  -4 2149.08    8.06
  -1   1  -4 2161.89   12.10
   1   1   4 2198.27   12.12
   1  -1   4 2246.40   12.19
  -1  -1  -4 2181.75   12.05
   1   1   4 2161.82   12.05
  -1  -1  -4 2199.11   12.21
   1   1   5  635.76    6.84
   1  -1   5  646.67    7.21
  -1   1  -5  630.99    7.20
  -1  -1  -5  643.71    4.79
  -1  -1  -5  629.68    7.00
   1   1   5  629.45    7.07
   1  -1   5  644.95    6.97
  -1   1  -5  624.47    7.07
   1  -1   5  634.51    7.05
  -1  -1  -5  637.12    7.13
   1   1   5  628.58    7.04
   1   1   6  216.34    4.33
   1  -1   6  220.07    4.57
  -1   1  -6  221.00    4.59
   1  -1   6  226.93    4.49
  -1  -1  -6  222.95    4.47
   1  -1   6  219.20    4.50
   1   1   6  220.52    4.50
  -1   1  -6  215.56    4.47
  -1  -1  -6  223.80    4.54
   1   1   6  212.27    4.38
   1  -1   7    1.25    0.55
   1   1   7    1.39    0.42
  -1   1  -7    1.76    0.53
  -1  -1  -7    1.51    0.30
  -1   1  -7    1.48    0.40
   1  -1   7    1.37    0.44
   1  -1   7    3.41    0.69
  -1  -1  -7    1.48    0.44
   1   1   7    1.88    0.44
  -1  -1  -7    2.41    0.58
   1   1   7    1.18    0.35
   1   1   8 1956.86   14.95
  -1   1  -8 1985.61   15.57
   1  -1   8 2009.55   15.68
  -1  -1  -8 1888.09   10.24
   1  -1   8 1969.57   15.15
   1  -1   8 1959.47   15.20
  -1   1  -8 1981.18   15.24
   1   1   8 1956.00   15.18
  -1  -1  -8 1945.43   15.09
   1   1   8 1950.14   15.02
  -1  -1  -8 2002.92   15.31
   1  -1   9  116.64    3.99
   1   1   9  111.73    3.82
  -1   1  -9  111.85    3.94
  -1  -1  -9  110.73    2.62
   1   1   9  117.54    3.94
  -1   1  -9  110.34    3.84
   1  -1   9  107.05    3.80
   1  -1   9  113.37    3.87
  -1  -1  -9  103.55    3.73
  -1  -1  -9  115.78    3.89
   1   1   9  113.07    3.82
  -1   1  -9  111.59    1.99
   1   1  10 1328.01   13.86
   1  -1  10 1308.17   14.18
  -1   1 -10 1337.08   14.23
  -1   1 -10 1251.36    9.59
  -1  -1 -10 1276.66    9.36
   1   1  10 1335.54   13.90
   1  -1  10 1287.71   13.72
  -1  -1 -10 1328.98   14.00
   1  -1  10 1309.53   13.76
  -1  -1 -10 1337.85   13.86
  -1   1 -10 1344.64   13.85
  -1  -1 -10 1331.45   13.85
  -1   1 -11  759.42   11.19
   1  -1  11  756.10   11.29
   1   1  11  741.07   10.87
  -1   1 -11  711.59    7.46
  -1  -1 -11  718.38    7.39
   1   1  11  762.85   10.93
   1  -1  11  735.30   10.77
   1  -1  11  731.03   10.75
  -1  -1 -11  742.66   11.00
  -1   1 -11  771.19   11.01
  -1  -1 -11  750.96   10.89
  -1  -1 -11  754.27   10.89
  -1   1 -11  711.67    5.81
   1   1  12 2233.12   19.74
  -1   1 -12 2220.98   19.99
   1  -1  12 2284.14   20.39
  -1  -1 -12 2134.18   13.34
  -1   1 -12 2135.11   13.21
   1  -1  12 2219.73   19.39
   1   1  12 2216.32   19.42
  -1   1 -12 2265.37   19.69
  -1  -1 -12 2259.86   19.70
   1  -1  12 2183.69   19.49
  -1  -1 -12 2216.86   19.90
  -1  -1 -12 2259.72   19.63
  -1   1 -12 2373.26   20.07
   1   1  13    8.13    1.27
  -1   1 -13    7.92    1.39
   1  -1  13    8.67    1.39
  -1   1 -13    9.15    0.95
  -1  -1 -13    9.75    0.99
  -1  -1 -13    7.46    1.16
   1   1  13   13.37    1.78
   1  -1  13    8.11    1.34
  -1   1 -13    8.76    1.34
  -1  -1 -13    6.97    1.16
  -1   1 -13    8.09    1.25
  -1   1 -13    7.28    0.69
  -1  -1 -13   13.69    1.79
   1   1  14  537.40   10.50
   1  -1  14  549.98   10.85
  -1   1 -14  511.37   10.36
  -1  -1 -14  499.89    7.02
  -1   1 -14  496.48    6.69
  -1   1 -14  543.21   10.47
   1  -1  14  504.75   10.08
  -1  -1 -14  537.07   10.41
  -1  -1 -14  536.24   10.56
   1   1  14  508.06   10.10
  -1  -1 -14  536.86   10.41
  -1   1 -14  516.94    5.77
  -1   1 -14  518.02   10.22
   1  -1  15   46.15    3.25
   1   1  15   42.35    3.06
  -1   1 -15   36.86    1.60
  -1   1 -15   46.59    3.22
  -1   1 -15   40.67    1.95
  -1  -1 -15   39.62    2.04
   1  -1  15   41.31    2.97
  -1   1 -15   40.53    2.99
   1   1  15   40.78    2.99
  -1  -1 -15   44.09    3.11
  -1  -1 -15   42.52    3.04
  -1  -1 -15   41.66    3.06
  -1   1 -15   39.57    2.96
  -1   1 -16  536.50   11.38
   1  -1  16  558.95   11.80
   1   1  16  551.55   11.47
  -1   1 -16  491.77    6.05
  -1  -1 -16  520.72    7.71
  -1   1 -16  520.21    7.02
   1   1  16  531.97   11.15
  -1   1 -16  560.04   11.45
  -1  -1 -16  550.58   11.33
  -1  -1 -16  544.81   11.45
   1  -1  16  512.03   11.00
  -1   1 -16  529.45   11.14
  -1  -1 -16  528.22   11.17
  -1  -1 -16  491.89    8.36
  -1   1 -17  369.99    5.42
  -1   1 -17  375.59    9.87
  -1  -1 -17  367.04    6.72
  -1   1 -17  366.74    6.03
   1  -1  17  385.30    9.82
   1   1  17  381.55    9.80
  -1  -1 -17  374.60    9.73
  -1  -1 -17  361.74    7.27
  -1   1 -17  368.67    9.66
  -1   1 -18    6.14    0.76
  -1   1 -18    6.81    1.43
  -1  -1 -18    5.74    0.90
  -1   1 -18    7.76    0.90
   1   1  18    5.52    1.23
   1  -1  18    4.56    1.14
  -1  -1 -18    5.59    0.99
  -1  -1 -18    6.35    1.46
  -1   1 -18    6.65    1.41
  -1   1 -19   35.87    3.33
  -1   1 -19   37.35    1.81
  -1   1 -19   39.14    1.99
  -1  -1 -19   37.38    2.32
   1  -1  19   39.18    3.41
   1   1  19   39.50    3.38
  -1  -1 -19   35.59    2.39
  -1  -1 -19   40.18    3.47
  -1   1 -19   35.26    3.18
  -1   1 -20  552.67    7.07
  -1   1 -20  546.64   13.11
  -1   1 -20  539.46    7.42
  -1  -1 -20  537.23    8.90
   1  -1  20  548.05   12.93
   1   1  20  544.83   12.91
  -1  -1 -20  535.75    9.46
  -1   1 -20  544.69   12.91
  -1  -1 -20  556.88   13.09
  -1   1 -21    6.70    0.83
  -1  -1 -21    6.02    1.04
  -1   1 -21    5.61    0.76
   1   1  21    5.65    1.44
   1  -1  21    7.88    1.72
  -1   1 -21    4.73    1.27
  -1  -1 -21    4.13    0.88
  -1  -1 -21    4.56    1.25
  -1   1 -22   12.23    1.14
  -1   1 -22   16.27    1.25
  -1  -1 -22   18.09    1.76
   1   1  22   14.30    2.23
   1  -1  22   17.73    2.45
  -1   1 -22   15.89    2.38
  -1  -1 -22   18.42    2.57
  -1  -1 -22   16.17    1.69
   1   1  23   15.87    2.32
   1  -1  23   15.36    2.38
  -1  -1 -23   18.68    2.60
  -1   1 -23   16.26    2.46
   1  -1  24   12.12    2.25
   1   1  24   11.33    2.02
  -1   1 -24   13.07    2.25
  -1  -1 -24   11.47    2.18
   1  -1  25    3.64    1.00
   1   1  25    4.28    1.48
  -1   1 -25    3.27    1.11
  -1  -1 -25    4.24    1.55
   1   1  26   -0.12    0.72
   1  -1  26    0.46    0.81
  -1  -1 -26    1.30    0.83
  -1   1 -26    1.62    1.20
   1   1  27   14.78    2.67
   1  -1  27   18.07    2.97
  -1  -1 -27   18.03    2.92
  -1   1 -27   18.12    2.97
   1   1  28  136.47    8.06
   1  -1  28  131.94    7.97
  -1  -1 -28  125.86    7.76
  -1   1 -28  133.48    8.02
   1  -3 -29    2.52    1.02
   1   3 -28   78.52    6.14
  -1  -3  28   78.46    6.03
  -1   3  28   80.15    6.07
   1  -3 -28   78.73    6.03
   1   3 -28   76.40    6.02
   1   3 -27   15.97    2.71
  -1   3  27   17.77    2.87
  -1  -3  27   19.16    2.94
   1   3 -27   17.35    2.80
   1  -3 -27   24.59    3.34
   1   3 -26  207.22    9.50
  -1   3  26  217.13    9.48
  -1  -3  26  208.74    9.43
   1  -3 -26  213.10    9.39
   1   3 -26  215.39    9.57
   1   3 -25    2.30    1.11
  -1   3  25    5.75    1.53
  -1  -3  25    4.10    1.30
   1  -3 -25    5.01    1.55
   1   3 -25    3.52    1.16
   1   3 -24  302.19   11.00
  -1  -3  24  314.52   10.98
  -1   3  24  327.35   11.00
   1   3 -24  318.90   11.05
   1  -3 -24  315.49   10.82
   1   3 -23    2.45    1.16
   1   3 -23    2.83    0.81
   1  -3 -23    3.11    0.81
  -1  -3  23    2.09    1.00
  -1   3  23    2.45    1.14
   1   3 -23    2.08    1.13
   1  -3 -23    2.13    0.95
   1   3 -22  612.87   14.80
   1  -3 -22  621.25   10.87
   1   3 -22  612.29   10.84
  -1  -3  22  626.65   14.69
  -1   3  22  627.05   14.37
   1  -3 -22  601.84   12.24
   1  -3 -22  622.80   14.37
   1   3 -21   83.55    5.35
   1  -3 -21   86.75    3.98
   1   3 -21   90.88    4.17
  -1   3  21   92.55    5.33
  -1  -3  21   85.87    5.15
  -1  -3  21   92.91    5.56
   1  -3 -21   91.85    5.38
   1  -3 -21   87.00    4.56
   1   3 -20  139.95    6.69
   1   3 -20  145.86    5.15
   1  -3 -20  143.77    5.05
  -1   3  20  150.94    6.63
  -1  -3  20  151.98    6.81
  -1  -3  20  141.00    6.44
   1  -3 -20  141.59    5.72
   1  -3 -20  145.14    6.54
   1   3 -19   10.52    1.76
   1  -3 -19   12.07    1.43
  -1  -3  19   10.08    1.71
  -1   3  19    9.43    1.53
  -1  -3  19   10.24    1.69
   1  -3 -19   12.91    1.67
   1  -3 -19   13.28    1.83
   1   3 -18   39.02    3.38
  -1   3  18   45.69    3.34
   1  -3 -18   38.99    2.52
  -1   3  18   46.22    3.43
  -1  -3  18   44.12    3.38
  -1  -3  18   45.35    3.52
   1  -3 -18   43.79    3.34
   1  -3 -18   42.98    3.03
   1   3 -17   48.15    3.55
  -1   3  17   44.70    3.31
   1  -3 -17   48.40    2.73
  -1  -3  17   50.12    3.59
  -1  -3  17   44.42    3.33
  -1   3  17   51.21    3.50
   1  -3 -17   45.60    3.10
   1  -3 -17   47.76    3.40
   1   3 -16   42.56    3.29
  -1   3  16   44.05    3.04
  -1  -3  16   46.22    3.45
   1  -3 -16   44.19    2.55
  -1  -3  16   44.72    3.20
   1   3 -16   46.37    3.29
   1  -3 -16   45.05    3.25
  -1   3  16   46.59    3.22
  -1  -3  16   45.49    3.29
   1  -3 -16   45.30    3.20
  -1   3  15    1.34    0.49
  -1  -3  15    0.14    0.51
   1   3 -15    0.49    0.51
   1  -3 -15    0.25    0.25
  -1  -3  15    0.09    0.40
  -1  -3  15    0.74    0.51
   1   3 -15    0.14    0.49
   1  -3 -15    0.40    0.35
  -1   3  15   -0.05    0.35
   1  -3 -15   -0.21    0.56
  -1  -3  14  251.06    7.48
   1   3 -14  238.61    7.23
  -1   3  14  238.93    6.51
   1  -3 -14  235.93    5.63
   1  -3 -14  237.27    6.97
  -1   3  14  235.74    6.77
   1   3 -14  232.33    6.93
  -1  -3  14  229.36    6.79
  -1   3  14  242.92    6.93
   1  -3 -14  236.88    6.81
  -1   3  13    0.12    0.32
  -1  -3  13    0.00    0.46
   1   3 -13    0.77    0.40
   1  -3 -13    0.83    0.37
  -1   3  13   -0.16    0.44
   1   3 -13    0.14    0.25
  -1  -3  13    0.07    0.33
   1  -3 -13    0.14    0.32
   1  -3 -13    1.04    0.53
  -1   3  13    0.72    0.53
  -1  -3  12  867.04   13.00
  -1   3  12  821.21   11.08
   1   3 -12  818.23   12.53
   1  -3 -12  809.00    9.90
  -1  -3  12  823.81   12.00
   1   3 -12  851.20   12.37
   1  -3 -12  820.98   11.95
  -1   3  12  823.42   11.79
   1  -3 -12  826.41   11.91
  -1   3  12  837.22   11.98
  -1   3  11  425.57    7.55
  -1  -3  11  453.38    9.01
   1   3 -11  429.88    8.69
   1  -3 -11  426.15    7.00
   1  -3 -11  435.14    8.34
  -1  -3  11  437.11    8.46
   1   3 -11  442.54    8.64
  -1   3  11  445.34    8.30
   1  -3 -11  451.97    8.43
  -1  -3  11  427.73    3.55
  -1   3  11  428.87    8.27
  -1   3  10 2677.25   17.91
   1   3 -10 2729.37   20.99
  -1  -3  10 2801.08   21.50
  -1  -3  10 2654.83    9.20
   1  -3 -10 2662.57   17.17
  -1   3  10 2681.40   17.01
  -1  -3  10 2684.93   20.27
  -1   3  10 2666.08   19.58
   1  -3 -10 2674.29   19.74
   1   3 -10 2761.15   20.71
  -1   3  10 2657.12   19.69
   1  -3 -10 2700.17   19.77
   1   3  -9  253.70    6.18
  -1  -3   9  260.56    6.28
  -1   3   9  252.67    5.17
  -1  -3   9  248.51    2.96
  -1   3   9  254.11    5.19
   1  -3  -9  254.13    5.21
  -1   3   9  243.96    5.68
   1  -3  -9  250.57    5.75
  -1  -3   9  254.06    6.00
   1   3  -9  254.49    6.09
  -1   3   9  252.84    5.81
   1  -3  -9  257.64    5.84
  -1  -3   8 1549.98   14.60
   1   3  -8 1476.34   14.25
  -1   3   8 1483.80   11.65
   1  -3  -8 1558.23    9.08
   1  -3  -8 1484.43   12.24
  -1   3   8 1546.90   12.40
   1  -3  -8 1492.73   13.44
   1   3  -8 1553.46   14.39
  -1   3   8 1498.03   13.28
  -1  -3   8 1531.37   14.20
   1  -3  -8 1499.28   13.41
  -1   3   8 1513.12   13.49
  -1  -3   7  107.70    3.68
   1   3  -7  100.65    3.57
   1  -3  -7  108.37    2.48
  -1   3   7  100.59    3.15
  -1   3   7   95.93    2.34
   1  -3  -7  100.54    3.15
  -1  -3   7  101.93    3.55
  -1   3   7   98.66    3.24
   1  -3  -7  102.78    3.31
   1   3  -7   99.72    3.57
  -1   3   7   99.13    3.27
   1  -3  -7  104.52    3.38
   1   3  -6 1133.65   11.33
  -1  -3   6 1171.51   11.54
   1  -3  -6 1142.57   10.38
  -1   3   6 1157.56   10.38
  -1   3   6 1111.71    8.25
   1   3  -6 1157.35   11.61
  -1   3   6 1153.62   10.57
   1  -3  -6 1134.97   10.47
  -1  -3   6 1142.98   11.44
   1  -3  -6 1135.16   10.61
  -1   3   6 1150.75   10.59
  -1  -3   5  165.16    4.12
   1   3  -5  157.59    4.01
   1  -3  -5  164.00    3.87
  -1   3   5  161.57    3.82
  -1   3   5  157.67    3.22
  -1  -3   5  165.30    4.19
   1  -3  -5  163.40    3.76
   1   3  -5  157.65    4.17
  -1   3   5  163.35    3.80
   1  -3  -5  161.43    3.80
  -1   3   5  157.96    3.75
   1   3  -4  300.39    5.28
  -1  -3   4  304.58    5.30
  -1   3   4  297.95    4.50
  -1   3   4  307.48    5.19
  -1   3   4  289.12    4.93
   1  -3  -4  302.24    5.21
  -1   3   4  295.36    4.87
  -1  -3   4  296.65    5.47
   1  -3  -4  274.76    4.63
   1   3  -4  301.92    5.56
  -1   3   4  302.61    4.93
   1  -3  -4  302.26    4.94
  -1  -3   3  951.23    8.90
   1   3  -3  923.03    8.76
  -1   3   3  916.93    6.28
  -1   3   3  908.38    8.15
   1  -3  -3  887.13    8.99
  -1   3   3  942.68    8.50
  -1   3   3  971.76    9.22
  -1   3   3  942.51    8.22
   1  -3  -3  924.05    8.15
   1  -3  -3  933.46    8.36
   1   3  -3  938.25    9.57
  -1   3   3  915.13    8.23
   1   3  -3  913.20    9.17
  -1  -3   3  924.77    9.55
  -1   3   2 3754.28   12.40
   1   3  -2 3800.52   16.91
  -1  -3   2 3788.10   16.84
  -1   3   2 3945.85   18.45
   1  -3  -2 3745.45   16.64
  -1   3   2 3838.98   17.10
  -1   3   2 3835.62   16.77
   1  -3  -2 3740.60   12.19
   1  -3  -2 3851.20   15.99
   1   3  -2 3784.83   18.12
  -1  -3   2 3841.02   18.31
  -1   3   2 3768.75   16.19
  -1  -3   2 3907.41   19.07
   1  -3  -2 3822.58   16.38
   1  -3  -1  596.30    5.03
   1  -3  -1  607.47    6.70
  -1   3   1  610.08    7.04
  -1   3   1  635.34    7.41
   1   3  -1  598.77    6.47
  -1   3   1  597.23    5.10
  -1  -3   1  608.21    6.44
  -1   3   1  597.52    6.39
  -1  -3   1  602.44    7.14
  -1  -3   1  592.29    7.41
   1   3  -1  611.59    7.16
   1  -3  -1  614.18    6.49
  -1   3   0 2757.05   15.46
  -1  -3   0 2792.53   13.37
  -1  -3   0 2773.32   12.26
   1   3   0 2808.47   13.58
  -1   3   0 2772.63   11.66
   1  -3   0 2771.09   11.66
   1  -3   0 2785.05   15.66
  -1   3   0 2759.56   13.86
   1  -3   0 2805.00   13.97
   1   3   0 2800.18   15.16
  -1  -3   0 2854.72   15.41
  -1   3  -1  832.50    6.90
   1  -3   1  846.79    7.00
   1   3   1  861.67    7.42
  -1  -3  -1  847.63    7.30
  -1   3  -1  825.76    8.59
  -1  -3  -1  830.71    6.72
  -1  -3  -1  853.44    8.36
  -1  -3  -1  856.02    8.50
  -1   3  -1  832.20    7.79
   1  -3   1  856.67    8.81
  -1   3  -1  830.35    8.71
   1   3   1  843.14    8.41
   1  -3   2  878.65    7.71
  -1   3  -2  864.70    7.65
   1   3   2  888.66    7.67
   1   3   2  873.76    7.07
  -1   3  -2  893.65    9.08
   1   3   2  918.99    8.50
   1  -3   2  878.86    9.20
  -1  -3  -2  863.29    8.62
  -1   3  -2  848.62    8.22
  -1   3  -2  869.69    9.15
  -1  -3  -2  880.25    8.87
   1   3   2  851.27    8.64
  -1   3  -3  284.09    4.75
   1  -3   3  283.65    4.77
   1   3   3  299.50    4.84
   1   3   3  291.44    4.31
   1   3   3  337.04    5.58
   1  -3   3  295.29    5.47
  -1  -3  -3  290.01    5.15
  -1  -3  -3  295.27    5.28
  -1   3  -3  289.70    5.42
   1   3   3  295.75    5.24
   1  -3   4   57.83    2.30
  -1   3  -4   58.50    2.30
   1   3   4   57.32    2.15
  -1  -3  -4   56.84    2.36
  -1   3  -4   56.12    2.50
   1   3   4   56.19    2.39
   1  -3   4   61.42    2.60
   1   3   4   56.75    2.38
  -1  -3  -4   52.73    2.34
   1  -3   5    0.49    0.21
  -1   3  -5    0.18    0.28
   1   3   5    0.79    0.35
   1   3   5    2.39    0.39
  -1  -3  -5    0.95    0.35
  -1  -3  -5    0.18    0.26
   1   3   5    1.06    0.44
  -1   3  -5    1.00    0.40
   1  -3   5    0.00    0.32
  -1  -3  -5    0.44    0.35
   1   3   5    0.04    0.26
   1  -3   6  607.44    8.41
  -1   3  -6  600.86    8.36
   1   3   6  590.22    5.40
  -1  -3  -6  582.02    7.02
   1   3   6  624.70    7.09
   1  -3   6  614.35    8.80
  -1  -3  -6  614.76    8.46
   1   3   6  613.10    8.48
  -1   3  -6  607.03    8.80
   1   3   6  610.45    8.50
  -1  -3  -6  606.10    8.53
   1  -3   7   53.25    2.64
  -1   3  -7   53.43    2.62
   1   3   7   55.87    2.16
  -1  -3  -7   56.60    2.20
   1   3   7   55.05    1.55
   1  -3   7   55.38    2.78
  -1   3  -7   57.46    2.81
  -1  -3  -7   57.14    2.71
   1   3   7   58.28    2.74
  -1  -3  -7   53.99    2.64
   1   3   7   55.75    2.69
   1  -3   8   88.90    3.55
  -1   3  -8   83.04    3.41
   1   3   8   77.43    2.60
  -1  -3  -8   79.22    2.64
   1   3   8   72.04    1.64
   1   3   8   76.42    3.24
   1  -3   8   78.92    3.40
  -1   3  -8   78.92    3.45
  -1  -3  -8   80.59    3.33
  -1  -3  -8   77.14    3.34
   1   3   8   77.07    3.29
   1   3   9   22.50    1.72
   1  -3   9   24.51    1.97
  -1   3  -9   23.29    1.92
   1   3   9   23.43    1.46
  -1  -3  -9   22.68    1.46
   1   3   9   23.13    1.92
  -1  -3  -9   23.13    1.90
  -1   3  -9   24.28    1.99
   1  -3   9   24.23    1.95
  -1  -3  -9   24.91    1.99
   1   3   9   23.20    1.90
  -1   3 -10 2156.35   19.18
   1   3  10 2128.23   17.49
   1  -3  10 2238.94   19.77
   1  -3  10 2123.24   18.96
  -1  -3 -10 2222.88   19.07
  -1   3 -10 2225.43   19.51
   1   3  10 2172.50   18.84
  -1  -3 -10 2185.78   18.95
   1   3  10 2194.01   19.05
  -1   3 -11   39.72    2.74
   1   3  11   39.65    2.50
   1  -3  11   43.30    2.89
  -1  -3 -11   37.47    1.94
   1   3  11   37.88    2.62
  -1   3 -11   38.70    2.67
  -1  -3 -11   37.54    2.60
   1  -3  11   37.68    2.60
  -1  -3 -11   42.38    2.73
   1   3  11   39.81    2.64
   1   3  12 1102.65   13.86
   1  -3  12 1160.34   15.41
  -1   3 -12 1062.30   14.64
  -1  -3 -12 1073.91   10.71
  -1   3 -12 1068.72   12.28
   1  -3  12 1070.85   14.41
   1   3  12 1095.05   14.41
  -1  -3 -12 1136.31   14.81
   1  -3  12 1093.24   14.34
  -1   3 -12 1161.89   15.20
  -1  -3 -12 1085.82   14.48
   1   3  12 1115.57   14.64
   1  -3  13  408.06    9.48
   1   3  13  389.96    8.57
  -1   3 -13  371.50    8.99
  -1   3 -13  381.97    7.49
  -1  -3 -13  378.17    6.51
  -1   3 -13  410.35    9.34
   1   3  13  384.84    8.87
   1  -3  13  374.81    8.78
  -1  -3 -13  397.73    9.04
   1  -3  13  382.46    8.90
   1   3  13  388.55    8.95
  -1  -3 -13  390.87    8.95
  -1   3 -14 1877.15   20.83
   1   3  14 1947.13   19.91
   1  -3  14 2020.99   21.85
  -1   3 -14 1850.45   16.84
  -1  -3 -14 1825.90   14.67
   1   3  14 1926.71   20.37
  -1  -3 -14 2002.67   21.06
   1  -3  14 1879.12   20.32
  -1   3 -14 2017.56   21.41
   1  -3  14 1892.60   20.48
  -1  -3 -14 1930.21   20.57
   1   3  14 1940.36   20.74
  -1   3 -15   11.31    1.69
   1   3  15   13.83    1.74
   1  -3  15   14.58    1.94
  -1   3 -15   12.33    1.43
  -1  -3 -15   13.07    1.28
  -1  -3 -15   13.92    1.90
   1  -3  15   11.33    1.69
   1  -3  15   12.40    1.72
   1   3  15   13.74    1.76
  -1   3 -15   13.69    1.81
  -1  -3 -15   15.80    1.92
   1   3  15   12.21    1.72
  -1   3 -16   46.29    3.52
   1   3  16   45.42    3.27
  -1   3 -16   43.52    2.66
  -1  -3 -16   48.57    2.52
   1  -3  16   45.21    3.36
   1  -3  16   46.15    3.47
   1   3  16   47.85    3.43
  -1  -3 -16   47.08    3.43
  -1   3 -17   85.99    4.94
   1   3  17   93.38    4.89
  -1  -3 -17   82.18    3.36
  -1   3 -17   87.26    3.84
   1   3  17   93.80    4.96
   1  -3  17   84.51    4.77
   1  -3  17   91.01    4.96
  -1  -3 -17   86.84    4.82
  -1   3 -18  207.87    7.86
  -1  -3 -18  200.82    5.37
  -1   3 -18  198.97    5.86
   1   3  18  202.49    7.55
   1  -3  18  202.49    7.60
   1  -3  18  200.22    7.62
  -1  -3 -18  207.91    7.67
  -1   3 -19  177.42    7.49
  -1  -3 -19  178.62    5.14
  -1   3 -19  172.04    5.49
   1  -3  19  172.44    7.25
   1  -3  19  176.19    7.28
   1   3  19  175.84    7.21
  -1  -3 -19  181.56    7.35
  -1   3 -20  271.23    9.54
  -1   3 -20  257.26    6.77
  -1  -3 -20  274.04    6.49
   1   3  20  275.20    9.31
   1  -3  20  251.91    8.97
   1  -3  20  260.27    9.08
  -1   3 -20  270.31    9.24
  -1  -3 -20  264.22    7.88
  -1  -3 -20  266.99    9.25
  -1   3 -21    5.03    1.34
  -1  -3 -21    5.35    0.93
  -1   3 -21    3.92    0.76
   1  -3  21    5.23    1.43
   1   3  21    4.26    1.13
  -1   3 -21    5.40    1.48
  -1  -3 -21    5.31    1.13
  -1  -3 -21    4.89    1.25
  -1   3 -22   91.97    5.86
  -1  -3 -22   90.94    3.89
  -1   3 -22   89.09    4.03
   1   3  22  101.21    5.98
   1  -3  22   93.10    5.77
  -1   3 -22   92.01    5.75
  -1  -3 -22   95.69    5.86
  -1  -3 -22   84.30    4.59
  -1   3 -23   25.09    3.11
   1  -3  23   21.16    2.81
   1   3  23   23.75    3.03
  -1  -3 -23   22.36    2.87
  -1   3 -23   22.33    2.90
  -1   3 -24   14.16    2.48
   1   3  24   11.96    2.22
   1  -3  24   12.30    2.27
  -1   3 -24   15.48    2.55
  -1  -3 -24   14.20    2.45
  -1   3 -25   19.55    2.99
   1   3  25   18.37    2.87
   1  -3  25   16.31    2.62
  -1   3 -25   17.87    2.71
  -1  -3 -25   16.54    2.59
   1   3  26   12.28    2.25
   1  -3  26   12.05    2.30
  -1   3 -26   13.30    2.48
  -1  -3 -26   12.97    2.41
   1  -3  27    6.70    1.88
   1   3  27    4.77    1.60
  -1   3 -27    5.23    1.50
  -1  -3 -27    4.35    1.51
  -1   5  28  154.04    8.64
   1  -5 -28  161.47    8.88
   1   5 -27   -0.18    0.63
  -1   5  27    1.06    1.14
  -1  -5  27    0.33    0.55
   1  -5 -27    2.04    0.93
   1   5 -27    0.91    0.83
   1   5 -26  164.07    8.83
  -1  -5  26  164.26    8.57
  -1  -5  26  163.40    8.66
  -1   5  26  172.20    8.67
   1  -5 -26  174.99    8.74
   1   5 -25    8.94    1.92
  -1  -5  25    7.44    1.83
  -1   5  25    8.62    2.02
  -1  -5  25   10.68    2.22
   1  -5 -25    8.08    1.79
   1   5 -24  197.34    9.20
  -1  -5  24  193.69    8.97
  -1   5  24  210.02    9.10
  -1  -5  24  205.41    9.10
   1  -5 -24  199.20    8.87
   1   5 -23   55.72    4.84
  -1   5  23   58.25    4.71
  -1  -5  23   56.09    4.73
  -1  -5  23   58.94    4.77
   1  -5 -23   59.32    4.70
   1   5 -22  399.41   12.37
   1  -5 -22  379.17    9.15
  -1  -5  22  382.69   11.84
  -1  -5  22  380.21   12.00
  -1   5  22  393.92   11.80
   1  -5 -22  387.09   11.73
   1   5 -21    1.09    0.79
   1  -5 -21    1.04    0.44
  -1  -5  21    1.00    0.69
  -1  -5  21    2.69    0.86
  -1   5  21    0.04    0.67
   1  -5 -21    1.37    0.90
   1   5 -20  210.20    8.59
   1  -5 -20  204.95    6.51
  -1  -5  20  214.35    8.43
  -1  -5  20  211.96    8.39
  -1   5  20  218.57    8.27
   1  -5 -20  214.24    8.23
   1   5 -19   13.11    2.02
   1   5 -19   10.91    1.69
   1  -5 -19   12.19    1.57
  -1   5  19   12.17    1.95
  -1  -5  19   12.88    2.04
  -1  -5  19   10.70    1.85
   1  -5 -19   10.24    1.81
  -1   5  18  318.00    8.83
   1   5 -18  317.65    9.98
   1  -5 -18  311.50    7.81
  -1   5  18  315.75    9.43
  -1  -5  18  309.45    9.61
  -1  -5  18  313.82    9.68
   1  -5 -18  321.49    9.57
  -1   5  17    2.16    0.67
   1   5 -17    2.15    0.74
   1  -5 -17    2.99    0.86
  -1   5  17    2.20    0.83
  -1  -5  17    1.00    0.58
   1  -5 -17    1.69    0.77
   1   5 -16  135.64    6.18
  -1   5  16  142.59    5.49
   1  -5 -16  139.37    5.10
  -1   5  16  137.94    5.89
  -1  -5  16  130.52    5.95
   1  -5 -16  141.36    6.03
  -1   5  15  111.66    4.66
   1   5 -15  104.59    5.24
   1  -5 -15  103.94    4.35
  -1  -5  15  107.19    5.24
  -1   5  15  109.34    5.12
   1  -5 -15  112.61    5.21
   1  -5 -15  106.88    5.08
  -1   5  15  109.07    5.14
  -1   5  14  144.68    5.10
  -1  -5  14  145.51    6.12
   1   5 -14  138.00    5.84
  -1   5  14  133.39    4.73
   1  -5 -14  145.09    5.03
  -1   5  14  133.04    5.47
   1  -5 -14  144.44    5.70
   1   5 -14  145.60    6.09
  -1  -5  14  134.72    5.74
   1  -5 -14  143.45    5.72
  -1   5  14  144.19    5.75
   1   5 -13  450.09   10.31
  -1  -5  13  462.70    4.17
  -1   5  13  455.68    8.71
  -1  -5  13  497.10   10.93
   1  -5 -13  464.43    8.85
  -1   5  13  469.04    8.87
   1  -5 -13  476.34   10.06
  -1   5  13  465.01    9.90
  -1  -5  13  470.67   10.43
   1   5 -13  503.04   10.96
  -1   5  13  465.61   10.03
   1  -5 -13  465.29    9.96
   1   5 -12   90.57    4.49
  -1  -5  12   96.23    4.63
  -1   5  12   91.32    3.73
  -1  -5  12   90.02    2.11
  -1   5  12   89.30    3.82
   1  -5 -12   95.44    3.98
   1  -5 -12   93.26    4.31
   1   5 -12   97.60    4.71
  -1   5  12   91.22    4.26
  -1  -5  12   89.21    4.47
   1  -5 -12   94.45    4.33
  -1   5  12   94.14    4.36
  -1   5  11   23.73    1.81
   1   5 -11   24.84    2.27
  -1  -5  11   27.50    2.43
  -1   5  11   25.40    2.01
   1  -5 -11   22.92    1.94
   1   5 -11   24.51    2.30
  -1  -5  11   22.84    2.18
  -1   5  11   24.77    2.18
   1  -5 -11   25.42    2.18
  -1   5  11   26.11    2.22
   1  -5 -11   26.93    2.22
  -1  -5  10  833.05   12.83
   1   5 -10  803.88   12.40
  -1   5  10  791.09    9.92
  -1   5  10  769.20    8.53
  -1   5  10  802.56   11.14
   1  -5 -10  804.81   11.28
  -1   5  10  788.85   11.77
   1   5 -10  826.91   13.12
  -1  -5  10  809.38   12.72
   1  -5 -10  802.15   11.82
   1  -5 -10  777.81   11.73
  -1   5  10  807.62   12.00
  -1  -5   9   60.38    3.36
   1   5  -9   57.14    3.24
  -1   5   9   54.78    2.36
  -1   5   9   57.90    2.99
   1  -5  -9   60.41    3.06
   1  -5  -9   50.74    2.90
  -1  -5   9   52.41    3.15
  -1   5   9   52.21    2.92
  -1   5   9   59.55    3.17
   1   5  -9   56.26    3.34
   1  -5  -9   54.48    3.01
  -1  -5   8 2063.23   19.11
   1   5  -8 2037.17   18.58
  -1   5   8 2000.30   17.15
  -1   5   8 1994.18   14.55
  -1   5   8 2064.72   17.52
   1  -5  -8 2071.22   17.82
  -1  -5   8 2021.64   19.21
   1  -5  -8 2047.22   17.77
  -1   5   8 2059.48   17.80
   1   5  -8 2097.90   20.06
   1  -5  -8 2050.58   17.86
  -1   5   8 2070.39   18.01
   1   5  -7  332.45    7.28
  -1  -5   7  353.95    7.53
  -1   5   7  346.19    7.16
  -1   5   7  347.38    6.91
   1  -5  -7  344.92    7.20
  -1   5   7  334.05    6.05
  -1  -5   7  348.37    7.78
  -1   5   7  341.95    7.04
   1  -5  -7  349.46    7.09
  -1   5   7  340.73    7.11
   1   5  -7  359.73    7.81
   1  -5  -7  347.93    7.14
   1   5  -7  355.74    8.04
  -1  -5   6 5303.35   28.17
   1   5  -6 5218.19   27.76
  -1   5   6 5298.72   26.34
  -1   5   6 5279.94   21.32
   1  -5  -6 5288.75   27.78
  -1   5   6 5319.06   27.83
  -1   5   6 5201.07   24.30
  -1   5   6 5281.54   26.88
   1  -5  -6 5315.65   26.67
  -1  -5   6 5193.54   29.89
   1  -5  -6 5227.16   27.09
   1   5  -6 5362.13   29.49
  -1   5   6 5266.07   27.02
   1   5  -6 5399.58   30.82
   1   5  -5   91.17    3.54
  -1  -5   5   94.77    3.66
  -1   5   5   94.60    3.45
  -1   5   5   95.18    2.78
  -1   5   5  100.56    3.87
  -1   5   5   96.81    3.38
   1  -5  -5   90.22    3.40
  -1  -5   5   93.84    3.92
  -1   5   5   91.87    3.50
   1   5  -5   92.87    3.96
   1  -5  -5   94.00    3.55
   1   5  -5   92.48    3.80
  -1   5   4 3222.90   15.82
   1   5  -4 3163.79   20.18
  -1   5   4 3173.43   19.79
  -1   5   4 3215.07   19.60
  -1   5   4 3281.73   21.78
  -1  -5   4 3201.08   22.78
   1  -5  -4 3190.42   19.90
  -1   5   4 3165.81   20.07
   1  -5  -4 3242.25   20.37
   1   5  -4 3236.01   21.81
   1   5  -4 3272.99   23.06
   1   5  -3  604.36    8.51
  -1   5   3  613.67    6.86
  -1  -5   3  605.98    8.55
   1  -5  -3  609.85    8.51
  -1   5   3  612.54    8.87
  -1   5   3  617.57    9.52
   1  -5  -3  621.85    8.57
  -1   5   3  614.35    8.71
   1   5  -3  619.81    9.43
   1  -5  -3  611.73    8.73
  -1  -5   3  616.22    9.85
  -1   5   2  534.69    6.46
   1   5  -2  536.94    7.88
  -1  -5   2  537.67    7.78
   1  -5  -2  521.25    7.83
   1  -5  -2  523.68    6.21
  -1   5   2  532.25    8.90
  -1   5   2  537.70    8.44
   1  -5  -2  529.36    7.85
   1  -5  -2  552.51    8.22
  -1   5   2  532.63    7.97
  -1  -5   2  536.65    8.64
  -1  -5   2  538.55    9.18
   1   5  -2  532.86    8.67
   1  -5  -1   40.90    1.78
  -1   5   1   42.86    2.53
  -1   5   1   36.24    2.25
   1  -5  -1   38.37    2.16
   1   5  -1   41.69    2.15
  -1  -5   1   41.94    2.11
  -1   5   1   42.24    1.85
   1  -5  -1   38.09    2.16
   1   5  -1   36.06    2.23
  -1   5   1   37.31    2.11
   1  -5  -1   37.38    2.41
  -1  -5   1   35.85    2.38
  -1  -5   1   36.84    2.27
  -1   5   0   39.13    2.38
  -1   5   0   37.88    2.36
   1  -5   0   37.63    2.15
  -1  -5   0   39.90    1.99
  -1  -5   0   39.04    1.97
   1   5   0   39.67    2.08
   1  -5   0   38.90    1.81
  -1   5   0   38.65    1.83
  -1   5   0   37.35    2.16
   1  -5   0   37.51    2.39
   1   5   0   38.35    2.30
   1  -5   0   38.48    2.18
  -1  -5   0   40.38    2.38
   1   5   1   57.16    2.43
   1  -5   1   56.81    2.30
  -1   5  -1   55.58    2.29
  -1   5  -1   59.32    2.97
  -1  -5  -1   56.79    2.34
  -1  -5  -1   57.83    2.38
  -1  -5  -1   60.52    2.83
   1   5   1   58.72    2.81
   1  -5   1   59.22    2.99
   1  -5   1   57.88    2.69
  -1  -5  -1   61.64    2.90
  -1   5  -1   58.51    2.71
  -1   5  -2  246.03    5.00
   1   5   2  271.68    5.26
   1  -5   2  265.05    5.19
  -1  -5  -2  251.98    4.96
   1   5   2  270.38    6.10
  -1   5  -2  243.80    6.12
  -1  -5  -2  253.02    5.82
   1   5   2  258.14    5.95
  -1  -5  -2  250.57    5.91
   1  -5   2  250.82    6.23
  -1   5  -2  257.94    5.75
   1  -5   3    3.99    0.67
  -1   5  -3    4.01    0.69
   1   5   3    3.59    0.65
   1   5   3    4.56    0.70
   1   5   3    4.28    0.90
  -1   5  -3    4.63    0.88
  -1  -5  -3    4.79    0.83
   1   5   3    4.01    0.76
  -1   5  -3    4.13    0.83
  -1  -5  -3    4.06    0.74
   1  -5   3    3.40    0.76
  -1   5  -3    4.40    0.76
  -1   5  -4  160.27    4.42
   1  -5   4  163.17    4.49
   1   5   4  152.67    4.24
   1   5   4  153.41    3.99
   1   5   4  158.18    4.08
   1   5   4  149.70    4.54
  -1   5  -4  163.12    5.12
  -1  -5  -4  158.47    4.80
   1  -5   4  160.15    5.12
   1   5   4  154.59    4.77
  -1   5  -4  160.92    4.79
  -1  -5  -4  151.21    4.75
  -1   5  -4  162.03    5.24
  -1   5  -5   97.99    3.61
   1  -5   5   98.54    3.66
   1   5   5   99.87    3.33
   1   5   5   98.29    3.69
   1   5   5   98.91    3.31
  -1   5  -5   97.83    4.03
   1   5   5   95.12    3.29
  -1  -5  -5  100.42    3.87
   1   5   5   95.35    3.89
   1  -5   5  101.53    4.15
   1   5   5   98.22    3.89
  -1   5  -5  105.08    4.35
  -1   5  -5   99.49    3.84
  -1  -5  -5  100.47    3.96
   1  -5   6  337.00    7.05
  -1   5  -6  338.96    7.02
   1   5   6  327.21    5.91
  -1   5  -6  343.36    7.65
   1   5   6  347.28    6.39
   1   5   6  333.64    6.72
   1   5   6  333.47    6.23
   1  -5   6  331.60    7.67
  -1  -5  -6  349.90    7.39
   1   5   6  336.46    7.34
  -1   5  -6  363.99    8.11
  -1  -5  -6  341.79    7.39
   1   5   6  337.09    7.35
  -1   5  -7   39.78    2.48
   1  -5   7   41.99    2.59
   1   5   7   41.04    2.02
  -1   5  -7   43.17    2.76
   1   5   7   39.44    2.34
   1   5   7   40.06    2.59
   1  -5   7   42.84    2.80
  -1  -5  -7   45.56    2.74
  -1  -5  -7   43.70    2.73
   1   5   7   43.54    2.71
  -1   5  -7   45.88    2.97
  -1   5  -8  771.14   11.47
   1  -5   8  838.71   12.09
  -1   5  -8  796.49   12.02
   1   5   8  774.57    8.53
   1   5   8  786.44   10.43
  -1   5  -8  822.81   12.86
   1   5   8  790.17   11.79
  -1  -5  -8  808.05   11.91
   1  -5   8  800.94   12.39
   1   5   8  785.42   11.88
  -1  -5  -8  779.41   11.77
   1  -5   9    1.35    0.62
  -1   5  -9    0.56    0.44
   1   5   9    0.40    0.18
   1   5   9   -0.21    0.42
  -1   5  -9    0.88    0.46
  -1  -5  -9    0.99    0.49
  -1  -5  -9    0.53    0.28
   1   5   9    0.60    0.48
   1  -5   9    0.21    0.33
  -1  -5  -9    0.37    0.35
  -1   5  -9    0.02    0.48
   1   5   9    0.14    0.32
   1  -5  10 1755.22   18.82
  -1   5 -10 1627.07   17.87
   1   5  10 1691.21   15.46
  -1  -5 -10 1635.92   15.39
   1   5  10 1592.52   11.33
  -1   5 -10 1667.17   17.84
  -1   5 -10 1766.11   19.62
   1   5  10 1644.42   18.05
   1  -5  10 1655.24   18.74
  -1  -5 -10 1689.72   18.24
   1  -5  10 1607.03    7.97
  -1  -5 -10 1653.46   18.16
   1   5  10 1701.65   18.49
   1  -5  11  505.42   10.47
  -1   5 -11  475.14   10.01
  -1  -5 -11  467.08    8.34
   1   5  11  467.98    5.82
  -1   5 -11  489.08    9.82
   1   5  11  478.89    8.34
  -1   5 -11  517.45   10.96
   1   5  11  489.59   10.17
   1  -5  11  485.15   10.43
  -1  -5 -11  509.32   10.33
  -1  -5 -11  495.00   10.17
   1   5  11  495.78   10.27
   1  -5  12  757.61   13.26
   1   5  12  727.46   11.47
  -1   5 -12  688.80   12.47
  -1   5 -12  713.82   12.05
  -1  -5 -12  705.87   10.34
   1   5  12  697.20   10.20
   1  -5  12  698.37   12.88
  -1   5 -12  765.54   13.67
  -1  -5 -12  753.81   12.95
   1   5  12  702.98   12.49
  -1  -5 -12  723.23   12.68
   1   5  12  737.99   12.88
   1  -5  13   11.36    1.69
   1   5  13   12.61    1.55
  -1   5 -13    9.85    1.57
  -1  -5 -13   12.16    1.39
   1   5  13   10.03    1.25
  -1   5 -13   11.84    1.62
   1   5  13   10.27    1.58
  -1  -5 -13    9.78    1.57
   1  -5  13   10.64    1.65
  -1  -5 -13   10.59    1.62
   1   5  13   11.42    1.64
   1   5  14  930.72   14.02
  -1   5 -14  927.76   15.45
  -1   5 -14  934.47   14.25
  -1  -5 -14  915.77   12.09
   1  -5  14  924.77   15.55
   1   5  14  934.49   15.16
  -1  -5 -14  944.21   15.32
  -1   5 -15   19.79    2.38
   1   5  15   19.79    2.13
  -1  -5 -15   18.05    1.76
  -1   5 -15   20.97    2.16
   1   5  15   19.67    2.20
   1  -5  15   20.65    2.38
  -1  -5 -15   19.37    2.27
  -1   5 -16  172.20    7.04
   1   5  16  170.81    6.42
  -1   5 -16  173.29    6.32
  -1  -5 -16  174.33    5.42
   1  -5  16  180.36    7.05
   1  -5  16  175.22    7.13
   1   5  16  183.61    7.13
  -1  -5 -16  180.13    7.07
  -1   5 -17   54.59    4.08
  -1   5 -17   51.37    3.48
  -1  -5 -17   54.85    3.08
   1   5  17   55.22    3.99
   1  -5  17   49.80    3.85
   1  -5  17   50.10    3.94
  -1  -5 -17   50.49    3.85
  -1   5 -18  337.94   10.47
  -1  -5 -18  339.31    7.74
  -1   5 -18  329.46    8.92
   1  -5  18  333.40   10.31
   1   5  18  310.23    9.78
   1  -5  18  348.37   10.36
  -1  -5 -18  347.47   10.38
  -1   5 -19    6.03    1.48
  -1   5 -19    4.01    0.79
  -1  -5 -19    5.96    1.04
   1   5  19    7.23    1.60
   1  -5  19    6.51    1.51
   1  -5  19    5.56    1.37
  -1  -5 -19    7.32    1.65
  -1   5 -20   95.92    5.88
  -1  -5 -20   98.80    4.29
   1  -5  20   91.17    5.65
   1  -5  20   97.90    5.93
   1   5  20   98.10    5.82
  -1  -5 -20   98.03    5.86
  -1   5 -21    6.25    1.58
   1  -5  21    4.79    1.30
   1  -5  21    6.26    1.57
   1   5  21    4.61    1.37
  -1  -5 -21    5.31    1.51
  -1   5 -22   10.34    2.11
   1  -5  22   10.34    1.95
   1  -5  22   10.26    2.04
   1   5  22   11.51    2.06
  -1  -5 -22   11.40    2.04
  -1   5 -23    0.62    0.84
   1  -5  23    1.48    1.00
   1   5  23    1.28    1.00
   1  -5  23    1.46    0.91
  -1  -5 -23    1.78    0.91
  -1   5 -24    3.40    1.07
   1  -5  24    5.35    1.46
   1   5  24    4.24    1.34
   1  -5  24    4.29    1.25
  -1  -5 -24    4.29    1.39
  -1   5 -25    3.59    1.37
   1  -5  25    2.04    0.88
   1   5  25    4.73    1.41
   1  -5  25    2.04    0.79
  -1  -5 -25    3.69    1.37
  -1   5 -25    3.96    1.41
  -1   5 -26   62.66    5.59
   1   5  26   58.88    5.30
   1  -5  26   52.73    4.98
  -1  -5 -26   57.74    5.19
  -1   5 -26   56.07    5.12
  -1  -7  26  101.49    7.07
  -1   7  26   96.67    6.81
  -1  -7  26   99.64    7.05
   1  -7 -26   97.67    6.81
   1   7 -25   13.42    2.53
  -1  -7  25   17.22    2.90
  -1  -7  25   15.08    2.66
  -1   7  25   17.91    2.89
   1  -7 -25   14.71    2.60
   1   7 -24  401.60   13.65
  -1  -7  24  399.56   13.46
  -1  -7  24  391.05   13.30
  -1   7  24  395.73   13.11
   1  -7 -24  401.24   13.19
   1   7 -23   57.46    5.07
  -1  -7  23   61.87    5.17
  -1   7  23   62.26    5.07
  -1  -7  23   62.31    5.23
   1  -7 -23   61.33    5.05
   1   7 -22   19.81    2.96
  -1   7  22   18.86    2.71
  -1  -7  22   22.47    3.06
  -1  -7  22   18.51    2.76
   1  -7 -22   18.35    2.80
   1   7 -21   38.33    3.96
  -1  -7  21   35.75    3.85
  -1   7  21   34.52    3.62
  -1  -7  21   33.51    3.59
   1  -7 -21   33.69    3.61
   1   7 -20   67.68    5.15
  -1   7  20   66.73    4.87
  -1  -7  20   68.59    5.10
   1  -7 -20   64.04    4.79
   1   7 -19   -0.18    0.55
  -1   7  19    0.79    0.69
  -1  -7  19   -0.93    0.86
   1  -7 -19    0.40    0.77
  -1   7  18    6.35    1.30
   1   7 -18    5.31    1.41
   1  -7 -18    4.19    0.99
  -1   7  18    3.50    1.07
  -1  -7  18    4.59    1.30
   1  -7 -18    4.29    1.09
   1   7 -17   -0.04    0.77
  -1   7  17   -0.18    0.44
   1  -7 -17    0.74    0.63
  -1   7  17    0.44    0.56
  -1  -7  17    1.16    0.63
   1  -7 -17   -0.26    0.60
  -1   7  16   39.94    2.96
   1   7 -16   37.28    3.45
   1  -7 -16   35.43    2.90
  -1   7  16   37.60    3.01
  -1   7  16   38.02    3.34
  -1  -7  16   35.24    3.41
   1  -7 -16   39.04    3.40
  -1   7  15    1.16    0.58
   1   7 -15    0.07    0.39
  -1  -7  15    0.83    0.21
  -1   7  15    1.53    0.74
   1  -7 -15    0.69    0.49
  -1   7  15    0.69    0.63
  -1  -7  15    0.04    0.46
   1  -7 -15    0.53    0.37
   1   7 -14    7.99    1.48
  -1   7  14   10.06    1.41
   1  -7 -14   11.72    1.65
  -1   7  14   11.19    1.60
  -1   7  14    9.83    1.67
  -1  -7  14    8.55    1.67
   1  -7 -14    9.80    1.58
   1   7 -13    0.16    0.53
  -1   7  13    2.13    0.70
  -1   7  13    1.64    0.53
   1  -7 -13    2.78    0.88
  -1   7  13    2.16    0.79
  -1  -7  13    2.62    0.86
  -1   7  13    1.67    0.63
   1  -7 -13    1.57    0.70
  -1  -7  12  657.45   13.14
   1   7 -12  607.84   12.49
  -1   7  12  603.94    9.90
  -1   7  12  618.89   11.54
  -1   7  12  617.17   11.58
  -1   7  12  580.31    9.01
   1  -7 -12  627.83   12.21
  -1  -7  12  594.82   12.93
  -1   7  12  607.39   12.05
   1  -7 -12  622.78   12.28
  -1   7  12  629.82   12.37
   1   7 -11    3.06    0.95
  -1  -7  11    3.48    0.97
  -1   7  11    2.30    0.56
  -1   7  11    2.06    0.65
  -1   7  11    2.53    0.67
  -1   7  11    2.06    0.65
  -1  -7  11    3.89    1.07
   1  -7 -11    2.22    0.81
  -1   7  11    1.81    0.72
  -1   7  11    2.69    0.90
   1  -7 -11    2.59    0.83
  -1  -7  10  345.59    9.15
   1   7 -10  342.35    8.88
  -1   7  10  330.60    7.09
  -1   7  10  338.82    8.23
  -1   7  10  347.14    8.53
  -1   7  10  345.61    7.02
  -1   7  10  341.86    8.64
   1  -7 -10  353.91    8.71
  -1  -7  10  333.80    9.25
   1   7 -10  345.62    9.32
   1  -7 -10  339.08    8.69
  -1   7  10  358.03    8.92
   1   7  -9  204.29    6.69
  -1  -7   9  215.40    6.98
  -1   7   9  201.52    6.19
  -1   7   9  196.23    5.58
  -1   7   9  208.81    5.31
  -1   7   9  203.11    6.51
   1  -7  -9  204.67    6.53
  -1  -7   9  197.62    7.11
   1   7  -9  213.73    7.18
   1   7  -9  210.60    7.41
   1  -7  -9  194.73    6.47
  -1   7   9  214.63    6.74
  -1  -7   8 1251.42   16.29
   1   7  -8 1188.68   15.60
  -1   7   8 1225.43   12.40
  -1   7   8 1154.13   13.65
  -1   7   8 1190.21   14.78
  -1   7   8 1180.50   15.76
   1  -7  -8 1201.72   15.38
  -1  -7   8 1158.16   16.84
   1   7  -8 1212.47   16.77
   1   7  -8 1249.04   17.89
   1  -7  -8 1190.46   15.57
  -1   7   8 1220.47   15.76
  -1  -7   7  429.44    9.27
   1   7  -7  385.19    8.69
  -1   7   7  413.00    7.05
  -1   7   7  414.68    9.24
  -1   7   7  393.58    8.13
  -1   7   7  406.62    8.48
   1  -7  -7  417.19    8.88
  -1  -7   7  392.51    9.80
   1   7  -7  407.90    9.55
   1   7  -7  430.14   10.29
  -1   7   7  408.57    8.97
   1  -7  -7  405.95    8.95
   1   7  -6  378.42    8.34
  -1   7   6  394.27    6.77
  -1  -7   6  386.81    8.57
  -1   7   6  384.56    8.08
  -1   7   6  388.64    8.97
  -1   7   6  377.10    8.08
  -1  -7   6  373.16    9.38
   1  -7  -6  391.52    8.46
  -1   7   6  372.00    8.43
   1   7  -6  390.03    9.17
   1  -7  -6  379.61    8.57
   1   7  -5   41.64    2.71
  -1  -7   5   46.02    2.87
  -1   7   5   46.04    2.30
  -1   7   5   43.93    2.81
  -1   7   5   48.68    3.18
   1  -7  -5   46.59    2.89
  -1  -7   5   42.87    3.11
  -1   7   5   43.00    2.80
   1   7  -5   41.57    2.94
   1  -7  -5   44.81    2.89
   1   7  -4  737.89   11.12
  -1  -7   4  748.21   11.14
  -1   7   4  752.60    9.20
  -1   7   4  744.48   11.72
  -1   7   4  750.01   12.44
  -1  -7   4  747.11   12.98
   1  -7  -4  730.82   11.29
   1   7  -4  752.61   12.40
   1  -7  -4  743.04   11.66
  -1   7   4  718.59   11.44
  -1  -7   3  813.55   11.36
  -1   7   3  807.38    9.61
   1   7  -3  789.40   11.22
  -1   7   3  812.64   12.98
   1  -7  -3  784.81   11.36
  -1   7   3  824.48   12.44
   1  -7  -3  796.70   11.70
  -1  -7   3  809.42   13.44
   1  -7  -3  813.01   12.05
   1   7  -3  798.30   12.65
  -1   7   3  791.44   11.88
  -1   7   2  289.49    5.77
   1   7  -2  288.31    6.69
  -1  -7   2  297.26    6.67
   1  -7  -2  275.29    5.49
  -1   7   2  285.88    7.42
   1  -7  -2  275.32    6.74
  -1   7   2  291.18    7.83
   1  -7  -2  272.70    6.83
   1  -7  -2  284.68    7.90
   1  -7  -2  278.90    7.05
  -1   7   2  279.02    6.98
  -1  -7   2  286.53    7.49
  -1  -7   2  275.61    7.86
   1   7  -2  277.59    7.37
   1  -7  -1  183.33    5.51
  -1   7   1  197.09    6.42
   1  -7  -1  185.99    4.59
  -1  -7   1  186.17    5.24
  -1  -7   1  183.54    5.12
  -1   7   1  187.94    6.10
  -1   7   1  189.72    4.75
   1   7  -1  189.56    5.31
  -1   7   1  186.06    5.75
   1  -7  -1  187.66    5.75
  -1  -7   1  183.35    5.98
   1   7  -1  190.58    6.09
  -1  -7   1  193.64    6.54
   1  -7  -1  190.02    6.40
   1   7   0  198.62    6.35
  -1   7   0  195.35    6.44
  -1  -7   0  191.81    5.17
   1  -7   0  179.16    5.51
  -1  -7   0  187.68    5.23
  -1   7   0  200.15    6.37
   1  -7   0  191.58    4.82
  -1   7   0  186.69    4.80
   1   7   0  192.87    5.31
  -1  -7   0  196.28    6.14
  -1   7   0  189.89    5.79
   1   7   0  198.06    6.19
   1  -7   0  188.05    5.79
  -1  -7   0  185.92    6.44
   1  -7   0  193.78    6.49
  -1   7  -1    0.60    0.30
   1   7   1    0.63    0.35
  -1   7  -1    0.25    0.35
   1   7   1    0.26    0.42
  -1  -7  -1    1.14    0.42
  -1  -7  -1    0.11    0.21
  -1   7  -1    0.91    0.60
   1   7   1    0.33    0.39
   1  -7   1    1.04    0.40
   1  -7   1    0.56    0.28
  -1  -7  -1    0.86    0.44
   1   7   1    0.44    0.26
  -1   7  -1    0.67    0.35
   1  -7   1   -0.05    0.49
  -1  -7  -1    0.48    0.37
  -1  -7  -1    0.58    0.46
   1  -7   1    0.79    0.46
   1   7   2    0.44    0.32
   1  -7   2    0.63    0.44
  -1   7  -2    1.28    0.44
   1   7   2    0.04    0.40
   1   7   2    1.79    0.63
  -1  -7  -2    1.23    0.40
  -1   7  -2    0.62    0.56
  -1  -7  -2    1.16    0.49
  -1   7  -2    1.43    0.58
  -1  -7  -2    1.06    0.55
   1  -7   2    2.13    0.79
   1   7   2    1.06    0.51
   1   7   3   36.06    2.25
   1  -7   3   34.55    2.27
  -1   7  -3   34.31    2.23
  -1   7  -3   36.72    2.81
   1   7   3   34.71    2.52
   1   7   3   33.62    2.64
  -1  -7  -3   36.79    2.66
   1  -7   3   34.68    2.80
   1   7   3   41.08    2.85
  -1   7  -3   37.14    2.66
  -1  -7  -3   36.06    2.71
  -1   7  -4  152.19    4.89
   1   7   4  150.93    4.61
   1  -7   4  150.87    4.91
   1   7   4  144.52    5.37
  -1   7  -4  155.47    5.89
   1   7   4  148.18    5.10
   1  -7   4  149.82    5.88
  -1  -7  -4  144.35    5.33
  -1   7  -4  153.83    5.47
   1   7   4  148.82    5.49
  -1  -7  -4  147.83    5.45
  -1   7  -5   10.66    1.35
   1  -7   5   10.68    1.35
   1   7   5    9.76    1.16
  -1   7  -5   11.28    1.64
   1   7   5   10.77    1.34
   1   7   5   10.49    1.44
  -1  -7  -5   10.41    1.44
   1  -7   5   10.17    1.53
  -1  -7  -5   10.19    1.46
  -1   7  -5   10.06    1.57
   1   7   5   10.15    1.48
  -1   7  -5   10.33    1.46
   1  -7   6  184.19    5.86
  -1   7  -6  175.38    5.61
   1   7   6  168.89    5.28
   1   7   6  175.06    5.17
  -1   7  -6  188.26    6.61
   1   7   6  175.52    5.86
   1   7   6  179.97    5.14
  -1  -7  -6  178.67    6.05
   1  -7   6  178.53    6.51
  -1  -7  -6  178.86    6.16
   1   7   6  175.91    6.12
  -1   7  -6  188.96    6.83
  -1   7  -6  178.67    6.14
   1  -7   7   11.98    1.55
  -1   7  -7   11.45    1.48
   1   7   7    9.46    1.25
   1   7   7   12.90    1.64
  -1   7  -7   13.49    1.83
   1   7   7   11.58    1.37
   1   7   7   12.60    1.37
  -1  -7  -7   11.73    1.62
   1  -7   7    9.82    1.55
  -1   7  -7   13.78    1.92
   1   7   7    9.68    1.50
  -1   7  -7   11.28    1.58
  -1  -7  -7   10.06    1.50
  -1   7  -8  125.40    5.05
   1  -7   8  129.96    5.21
   1   7   8  130.59    5.12
  -1   7  -8  127.39    5.61
   1   7   8  125.66    4.47
   1   7   8  130.84    4.68
   1   7   8  122.64    4.35
   1  -7   8  122.43    5.56
  -1  -7  -8  133.72    5.44
   1   7   8  132.21    5.47
  -1   7  -8  136.77    6.00
  -1  -7  -8  126.12    5.35
  -1   7  -8  136.06    5.56
  -1   7  -9   19.76    2.04
   1  -7   9   23.33    2.29
   1   7   9   21.52    1.88
   1   7   9   22.66    2.01
  -1   7  -9   24.89    2.52
   1   7   9   24.51    1.90
   1   7   9   20.65    2.02
  -1  -7  -9   22.40    2.27
   1  -7   9   22.69    2.45
   1   7   9   20.50    2.18
   1   7   9   23.98    2.39
  -1   7  -9   23.12    2.34
  -1  -7  -9   21.62    2.27
  -1   7 -10  109.65    5.01
   1  -7  10  120.70    5.37
   1   7  10  110.73    3.94
   1   7  10  112.65    4.45
   1   7  10  116.69    4.70
   1   7  10  111.70    4.73
   1   7  10  111.68    5.19
   1  -7  10  110.71    5.45
  -1  -7 -10  114.53    5.23
   1   7  10  117.98    5.38
  -1  -7 -10  109.23    5.15
  -1   7 -10  120.77    5.49
   1  -7  11    3.40    0.99
  -1   7 -11    1.94    0.81
   1   7  11    1.79    0.63
   1   7  11    1.78    0.51
   1   7  11    2.20    0.76
   1   7  11    1.76    0.42
   1  -7  11    2.66    0.91
   1   7  11    2.29    0.83
  -1  -7 -11    2.11    0.95
  -1   7 -12  674.17   13.19
   1   7  12  674.82    9.13
   1   7  12  697.30   11.89
   1   7  12  700.01   12.10
   1   7  12  690.88   13.55
   1  -7  12  680.34   14.02
   1  -7  12  691.25    6.83
  -1  -7 -12  695.89   13.60
  -1   7 -13    5.23    1.23
   1  -7  13    3.99    0.44
   1   7  13    4.13    0.97
   1   7  13    2.62    0.49
   1   7  13    4.12    0.97
   1  -7  13    2.81    0.99
   1   7  13    1.86    0.84
  -1  -7 -13    2.39    0.84
  -1   7 -14  155.31    6.70
   1   7  14  157.59    5.93
   1   7  14  156.77    5.75
   1   7  14  159.57    6.81
   1  -7  14  153.58    6.95
  -1  -7 -14  157.42    6.79
  -1   7 -15  185.32    7.55
   1   7  15  190.35    6.74
   1   7  15  199.31    6.51
   1  -7  15  187.63    7.85
   1   7  15  197.28    7.74
  -1  -7 -15  191.65    7.67
   1   7  16  470.50   10.87
  -1   7 -16  454.70   12.16
   1   7  16  478.45   10.10
   1  -7  16  468.76   12.61
   1   7  16  475.90   12.30
  -1  -7 -16  459.50   12.10
  -1   7 -17    6.19    1.57
   1   7  17    5.07    1.32
   1  -7  17    5.65    1.50
  -1  -7 -17    5.14    1.30
  -1   7 -18  106.98    6.19
   1  -7  18  104.73    6.02
   1   7  18  107.32    6.14
   1  -7  18  110.96    6.40
  -1  -7 -18  107.30    6.14
  -1   7 -19    4.82    1.53
   1   7  19    3.08    1.21
   1  -7  19    3.34    1.16
   1  -7  19    2.18    0.79
  -1  -7 -19    4.31    1.43
  -1   7 -20  116.87    6.83
   1  -7  20  118.28    6.74
   1   7  20  119.77    6.84
   1  -7  20  115.87    6.86
  -1  -7 -20  120.62    6.84
  -1   7 -21    2.41    0.91
   1  -7  21    2.29    0.91
   1   7  21    4.50    1.43
   1  -7  21    1.85    0.90
  -1  -7 -21    3.78    1.34
  -1   7 -22   49.65    4.70
   1  -7  22   51.60    4.80
   1   7  22   54.82    4.86
   1  -7  22   50.37    4.66
  -1  -7 -22   51.41    4.70
  -1   7 -23    7.92    1.90
   1  -7  23    9.39    2.11
   1   7  23    7.71    1.99
   1  -7  23    8.51    2.08
  -1  -7 -23    8.46    1.95
  -1   7 -24   13.21    2.57
   1  -7  24   12.79    2.46
   1   7  24   15.22    2.78
   1  -7  24   15.89    2.80
  -1  -7 -24   11.22    2.27
  -1   7 -25    1.71    0.88
   1   7  25    3.04    0.97
   1  -7  25    2.97    1.21
  -1  -7 -25    3.24    1.27
  -1   9  25   15.08    2.62
  -1   9  24  270.79   10.80
  -1   9  24  281.24   11.56
   1  -9 -24  283.28   11.65
   1   9 -23   24.14    3.54
  -1   9  23   21.60    3.01
  -1  -9  23   23.87    3.31
  -1   9  23   24.96    3.38
   1  -9 -23   22.27    3.33
   1   9 -22   91.57    6.61
  -1   9  22   92.12    6.00
  -1   9  22   91.89    6.39
  -1  -9  22   97.16    6.81
   1  -9 -22   93.35    6.44
   1   9 -21   81.47    6.10
  -1   9  21   87.40    5.77
  -1  -9  21   88.51    6.49
  -1   9  21   89.34    6.18
   1  -9 -21   86.33    6.07
   1   9 -20   16.55    2.69
  -1   9  20   15.08    2.29
  -1   9  20   13.32    2.32
  -1  -9  20   16.70    2.74
   1  -9 -20   10.98    2.15
   1   9 -19   10.89    2.13
  -1   9  19   10.87    2.01
  -1   9  19   10.24    1.79
  -1   9  19    8.94    1.88
  -1  -9  19   10.63    2.15
   1  -9 -19   10.87    2.08
   1   9 -18   10.38    2.11
  -1   9  18   11.52    1.92
  -1   9  18   10.24    1.64
  -1   9  18   10.45    1.95
  -1   9  18   10.78    2.13
  -1  -9  18   12.24    2.36
   1  -9 -18    8.46    1.78
   1   9 -17    3.54    1.16
  -1   9  17    4.31    1.02
  -1   9  17    5.26    1.35
  -1   9  17    3.55    1.20
  -1   9  17    4.82    1.30
  -1  -9  17    3.64    1.20
   1  -9 -17    3.33    1.11
   1   9 -16    0.51    0.49
  -1   9  16    0.30    0.55
  -1   9  16    0.93    0.74
  -1   9  16    0.84    0.60
  -1  -9  16    1.13    0.74
  -1   9  16    0.60    0.67
   1  -9 -16    0.83    0.55
  -1   9  15   49.89    3.29
   1   9 -15   48.38    4.05
  -1   9  15   53.27    3.92
  -1   9  15   50.63    3.29
  -1   9  15   45.46    3.68
  -1   9  15   44.83    3.87
  -1  -9  15   49.96    4.40
   1  -9 -15   44.44    3.85
   1   9 -14   56.96    4.35
  -1   9  14   58.35    3.43
  -1   9  14   64.07    4.35
  -1   9  14   57.30    4.03
  -1   9  14   58.32    3.27
  -1   9  14   58.58    3.47
  -1  -9  14   53.38    4.43
   1  -9 -14   59.46    4.40
   1   9 -13    7.18    1.53
  -1   9  13    6.98    1.14
  -1   9  13    6.19    1.37
  -1   9  13    6.72    1.13
  -1   9  13    6.53    1.16
  -1   9  13    7.76    1.50
  -1  -9  13    5.98    1.44
   1  -9 -13    7.60    1.58
   1   9 -12  316.68    9.71
  -1   9  12  331.34    7.79
  -1   9  12  297.98    7.74
  -1   9  12  309.96    9.36
  -1   9  12  317.63    9.08
  -1  -9  12  306.36   10.31
   1  -9 -12  312.30    9.68
   1   9 -11   36.84    3.25
  -1   9  11   34.53    3.01
  -1   9  11   39.58    2.66
  -1   9  11   39.32    3.33
  -1   9  11   35.17    2.73
  -1  -9  11   44.61    3.89
   1  -9 -11   36.89    3.27
   1   9 -10  776.29   14.53
  -1   9  10  820.73   11.73
  -1   9  10  783.95   14.67
  -1   9  10  749.90   12.72
  -1   9  10  764.15   13.53
  -1  -9  10  754.25   15.78
   1  -9 -10  762.62   14.51
  -1   9   9   37.49    2.48
   1   9  -9   38.93    3.20
  -1   9   9   33.55    2.74
  -1   9   9   34.90    3.17
  -1  -9   9   36.61    3.47
   1  -9  -9   34.68    3.06
  -1  -9   8  392.26    9.96
   1   9  -8  364.80    9.52
  -1   9   8  385.81    7.76
  -1   9   8  381.41   10.29
  -1   9   8  363.73    9.04
  -1  -9   8  357.68   10.64
   1  -9  -8  363.85    9.80
   1   9  -7   81.23    4.38
  -1   9   7   88.21    3.66
  -1  -9   7   84.37    4.50
  -1   9   7   85.96    4.84
  -1   9   7   73.85    4.12
   1  -9  -7   77.62    4.35
  -1  -9   7   77.07    4.93
   1  -9  -7   76.35    4.42
  -1  -9   6   60.94    3.73
   1   9  -6   62.44    3.76
  -1   9   6   65.04    3.11
  -1   9   6   60.38    4.08
  -1   9   6   60.06    3.76
   1  -9  -6   62.19    3.84
  -1  -9   6   58.76    4.28
  -1   9   6   62.77    3.96
   1  -9  -6   60.55    3.92
  -1   9   5    5.28    0.90
   1   9  -5    3.41    0.84
  -1  -9   5    5.91    1.13
  -1   9   5    4.70    1.09
  -1   9   5    4.79    1.11
   1  -9  -5    3.94    0.99
  -1  -9   5    6.33    1.48
   1  -9  -5    3.20    0.81
  -1   9   5    4.15    0.88
  -1  -9   4  260.93    7.37
  -1   9   4  262.87    6.23
   1   9  -4  254.06    7.30
  -1   9   4  248.36    7.81
  -1   9   4  243.46    8.16
  -1  -9   4  233.37    8.37
   1  -9  -4  238.06    7.42
  -1   9   4  247.32    7.69
   1  -9  -4  235.90    8.37
   1  -9  -4  237.68    7.62
   1   9  -3   -0.33    0.49
  -1   9   3   -0.14    0.35
  -1  -9   3   -0.63    0.51
  -1  -9   3    0.40    0.33
   1  -9  -3   -1.23    0.81
  -1   9   3   -0.74    0.83
   1  -9  -3   -0.74    0.69
  -1   9   3   -0.26    0.62
  -1  -9   3   -0.32    0.49
   1  -9  -3   -0.04    0.53
   1  -9  -3   -0.33    0.76
   1   9  -2  308.03    7.76
  -1   9   2  309.51    6.93
  -1  -9   2  298.88    7.55
   1   9  -2  320.10    9.45
   1  -9  -2  289.98    7.92
  -1   9   2  330.90    9.61
  -1  -9   2  305.02    7.83
   1  -9  -2  303.47    8.32
  -1   9   2  304.00    8.44
   1  -9  -2  301.15    8.50
   1   9  -2  305.67    8.85
  -1  -9   2  305.88    9.54
   1  -9  -2  290.88    9.24
   1   9  -1   74.33    3.76
  -1   9   1   74.58    3.43
   1  -9  -1   74.17    4.01
  -1  -9   1   70.51    3.59
   1  -9  -1   71.11    3.27
  -1  -9   1   74.86    3.84
  -1   9   1   75.82    4.63
   1   9  -1   78.02    4.68
   1  -9  -1   75.24    4.10
   1  -9  -1   72.27    4.57
  -1  -9   1   72.75    4.29
  -1  -9   1   73.13    4.66
   1  -9  -1   73.94    4.20
  -1   9   1   73.64    4.15
   1   9  -1   73.55    4.33
   1   9   0  564.11   10.26
  -1   9   0  545.83    9.43
   1  -9   0  524.01   10.77
  -1  -9   0  517.43   10.03
   1   9   0  558.18   12.44
  -1  -9   0  537.81    9.80
   1  -9   0  535.12    9.15
  -1   9   0  552.71   12.47
  -1  -9   0  539.69   11.49
   1   9   0  539.85   11.68
   1  -9   0  512.77   11.10
  -1   9   0  534.94   11.28
   1  -9   0  530.31   12.44
  -1  -9   0  525.39   12.49
  -1  -9   0  524.70   11.61
  -1   9  -1   52.21    2.97
   1   9   1   54.59    3.18
   1   9   1   57.05    3.96
   1  -9   1   51.63    3.38
  -1  -9  -1   50.23    2.97
  -1  -9  -1   51.37    3.15
   1  -9   1   52.81    2.96
  -1   9  -1   53.15    3.92
  -1  -9  -1   47.55    3.43
   1  -9   1   52.92    3.91
  -1  -9  -1   53.62    3.99
   1   9   1   52.50    3.64
  -1  -9  -1   51.30    3.64
  -1   9  -1   51.26    3.47
  -1   9  -2   32.85    2.39
   1   9   2   33.95    2.48
   1   9   2   35.43    3.08
  -1   9  -2   28.15    2.83
   1  -9   2   30.93    2.34
   1  -9   2   30.49    2.62
  -1  -9  -2   37.24    3.06
   1  -9   2   29.75    2.96
  -1   9  -2   33.41    2.85
  -1  -9  -2   34.92    3.01
  -1  -9  -2   34.52    3.22
  -1   9  -3   24.01    2.09
   1  -9   3   24.59    2.13
   1   9   3   26.74    2.18
  -1   9  -3   26.64    2.76
   1   9   3   24.33    2.46
   1   9   3   27.37    2.76
  -1  -9  -3   25.74    2.57
   1  -9   3   26.13    2.78
  -1  -9  -3   23.57    2.62
  -1   9  -3   24.58    2.46
  -1  -9  -3   25.97    2.59
  -1   9  -4  113.35    4.70
   1  -9   4  113.42    4.73
   1   9   4  115.13    4.56
   1   9   4  113.12    5.49
   1   9   4  114.32    5.23
  -1   9  -4  117.98    5.88
   1  -9   4  113.07    5.79
  -1   9  -4  112.63    5.31
  -1  -9  -4  110.94    5.40
   1  -9   5   22.98    2.20
  -1   9  -5   22.33    2.18
   1   9   5   26.27    2.20
   1   9   5   19.76    2.11
   1   9   5   20.65    2.32
   1  -9   5   19.00    2.39
  -1  -9  -5   24.65    2.57
   1   9   6   70.76    3.61
  -1   9  -6   74.73    4.03
   1  -9   6   75.19    4.12
   1   9   6   70.92    4.01
   1   9   6   73.34    4.45
   1  -9   6   71.69    4.73
  -1  -9  -6   67.93    4.31
   1  -9   7    8.87    1.43
  -1   9  -7    9.89    1.50
   1   9   7    8.27    1.27
   1   9   7    7.69    1.34
   1   9   7   10.29    1.67
   1  -9   7    6.61    1.50
  -1  -9  -7    8.50    1.62
  -1   9  -8  137.36    5.75
   1   9   8  138.44    5.19
   1  -9   8  141.22    5.88
   1   9   8  133.21    5.38
   1   9   8  136.99    6.05
   1  -9   8  131.59    6.51
  -1  -9  -8  130.84    6.14
  -1   9  -9   36.29    3.03
   1  -9   9   39.94    3.24
   1   9   9   36.28    3.15
   1   9   9   40.64    2.83
   1   9   9   37.53    2.80
   1   9   9   36.49    2.80
   1  -9   9   33.65    3.36
  -1  -9  -9   36.73    3.34
  -1   9 -10  265.07    8.39
   1   9  10  271.95    8.50
   1   9  10  270.15    7.72
   1   9  10  270.08    7.39
   1   9  10  256.34    7.21
   1  -9  10  271.07    9.54
  -1  -9 -10  258.14    8.85
  -1   9 -11   39.86    3.38
   1   9  11   37.26    2.73
   1   9  11   40.32    3.06
   1   9  11   37.19    2.81
   1   9  11   38.79    3.24
   1  -9  11   40.90    3.80
  -1  -9 -11   42.24    3.66
  -1   9 -12  691.25   14.25
   1   9  12  695.93   13.69
   1   9  12  708.12   13.12
   1   9  12  721.07   12.58
   1   9  12  682.29   11.31
   1  -9  12  692.11   15.78
   1  -9  12  690.04    9.32
  -1  -9 -12  702.93   15.04
  -1   9 -13  151.37    6.88
   1   9  13  153.21    5.21
   1   9  13  162.34    6.44
   1   9  13  153.90    6.51
   1   9  13  161.04    6.10
   1  -9  13  156.82    7.62
  -1  -9 -13  158.91    7.30
   1   9  14  557.95   11.56
  -1   9 -14  543.19   13.41
   1   9  14  568.10   11.70
   1   9  14  558.58   12.23
   1   9  14  569.49   12.54
   1  -9  14  537.56   14.34
   1   9  14  541.31   13.62
  -1  -9 -14  560.99   13.95
  -1   9 -15    2.34    0.95
   1   9  15    1.88    0.81
   1   9  15    4.61    1.23
   1   9  15    3.96    1.07
   1   9  15    2.27    0.90
   1  -9  15    2.30    0.91
  -1  -9 -15    2.36    1.04
  -1   9 -16  218.96    8.94
   1   9  16  222.90    7.95
   1   9  16  234.76    7.88
   1   9  16  230.96    8.22
   1  -9  16  228.58    9.59
   1   9  16  231.08    9.20
  -1  -9 -16  220.56    9.08
  -1   9 -17    0.26    0.65
   1   9  17    1.46    0.90
   1   9  17    0.91    0.83
   1   9  17    1.14    0.70
   1   9  17    1.48    0.81
   1  -9  17    0.26    0.51
  -1  -9 -17    2.09    1.11
  -1   9 -18   15.11    2.52
   1   9  18   12.44    1.90
   1   9  18   13.44    2.01
   1   9  18   13.88    2.11
   1  -9  18   13.92    2.50
   1   9  18   12.88    2.36
  -1  -9 -18   13.58    2.46
  -1   9 -19   14.11    2.48
   1   9  19   12.54    2.09
   1  -9  19    9.80    2.16
   1   9  19   14.27    2.45
  -1  -9 -19   11.98    2.25
  -1   9 -20   37.60    4.05
   1   9  20   36.38    3.68
   1  -9  20   42.57    4.50
   1   9  20   39.35    4.15
   1  -9  20   39.14    4.13
  -1  -9 -20   37.42    4.10
  -1   9 -21    8.57    1.90
   1   9  21    9.15    1.83
   1  -9  21    8.88    2.09
   1   9  21    9.10    2.01
   1  -9  21   10.75    2.29
  -1  -9 -21   11.36    2.52
  -1   9 -22   -0.30    0.51
   1   9  22    0.09    0.49
   1   9  22   -0.07    0.60
   1  -9  22    0.62    0.74
  -1  -9 -22   -1.21    1.09
  -1   9 -23   -1.53    1.20
   1  -9  23   -1.23    1.13
  -1  11  21    3.68    1.44
   1  11 -21    0.95    0.81
   1 -11 -21    3.64    1.53
  -1  11  20   28.25    3.34
  -1  11  20   26.83    3.25
   1  11 -20   24.14    3.34
   1 -11 -20   24.45    3.40
  -1  11  19    3.45    1.34
  -1  11  19    2.57    1.06
   1  11 -19    3.69    1.41
   1 -11 -19    4.66    1.51
   1  11 -18   26.92    3.48
  -1  11  18   23.93    2.97
  -1  11  18   25.77    3.15
  -1 -11  18   25.46    3.61
   1 -11 -18   29.15    3.59
   1  11 -17    2.09    1.07
  -1  11  17    0.79    0.76
  -1  11  17    1.79    0.84
  -1 -11  17    0.97    0.58
   1 -11 -17    0.39    0.60
   1  11 -16   53.97    4.73
  -1  11  16   54.84    4.50
  -1  11  16   57.21    4.47
  -1 -11  16   58.95    5.26
   1 -11 -16   58.57    4.98
   1  11 -15    0.21    0.77
  -1  11  15    0.67    0.60
  -1  11  15    2.36    1.23
  -1 -11  15    1.13    0.70
   1 -11 -15   -0.63    1.16
   1  11 -14  134.88    7.14
  -1  11  14  142.25    7.23
  -1 -11  14  137.64    7.86
   1 -11 -14  131.70    7.16
   1  11 -13    4.94    1.37
  -1  11  13    6.10    1.64
  -1 -11  13    8.55    1.99
   1 -11 -13    6.98    1.53
  -1  11  12   46.43    3.06
   1  11 -12   46.41    4.03
  -1  11  12   45.46    4.06
  -1 -11  12   44.23    4.35
   1 -11 -12   44.97    4.05
   1  11 -11    3.43    1.16
  -1  11  11    6.58    1.11
  -1  11  11    5.89    1.55
  -1 -11  11    7.44    1.83
   1 -11 -11    3.59    1.25
  -1  11  10  172.62    5.74
   1  11 -10  157.54    7.11
  -1  11  10  162.45    7.62
  -1 -11  10  153.97    7.93
   1 -11 -10  151.47    7.27
   1  11  -9   -0.97    0.84
  -1  11   9    0.04    0.42
  -1  11   9    0.81    0.51
  -1 -11   9    0.07    0.69
   1 -11  -9   -0.46    0.83
   1  11  -8   83.44    4.98
  -1  11   8   87.42    4.01
  -1  11   8   89.19    5.61
  -1 -11   8   82.09    5.75
   1 -11  -8   83.39    5.24
  -1  11   7    0.60    0.40
   1  11  -7    2.29    0.77
  -1  11   7    1.85    0.93
  -1 -11   7    1.67    0.97
   1 -11  -7    2.30    1.02
   1 -11  -7    1.32    0.72
  -1  11   6  599.64   10.43
   1  11  -6  557.04   12.33
  -1  11   6  553.96   13.92
   1  11  -6  592.15   14.95
  -1 -11   6  548.87   14.65
   1 -11  -6  549.72   14.57
   1 -11  -6  543.26   13.16
   1  11  -5    0.37    0.56
  -1  11   5   -0.74    0.67
  -1  11   5    1.90    1.11
   1  11  -5    2.43    1.35
  -1 -11   5    0.97    0.76
   1 -11  -5    0.74    0.74
   1 -11  -5   -0.40    0.63
  -1  11   4  289.80    7.30
   1  11  -4  270.93    8.29
   1  11  -4  284.38   10.29
  -1  11   4  273.58    9.90
  -1 -11   4  271.58    8.20
  -1 -11   4  264.47   10.15
   1 -11  -4  258.79    8.99
   1 -11  -4  269.43   10.08
   1  11  -3   55.75    3.68
  -1  11   3   58.04    3.27
  -1 -11   3   56.12    3.66
   1  11  -3   57.04    4.61
  -1  11   3   58.20    4.59
  -1 -11   3   48.82    4.31
   1 -11  -3   55.49    4.52
   1 -11  -3   50.23    3.94
   1  11  -2   94.98    5.84
  -1  11   2   91.76    5.72
  -1 -11   2   86.42    4.71
  -1 -11   2   87.01    4.49
   1  11  -2   92.20    4.70
  -1  11   2   96.11    4.26
   1 -11  -2   90.39    5.81
   1 -11  -2   87.07    5.17
  -1 -11   2   91.71    5.86
   1  11  -1   35.24    3.59
  -1  11   1   34.46    3.50
  -1 -11   1   33.57    2.74
  -1 -11   1   32.02    2.80
  -1  11   1   37.01    2.69
   1  11  -1   36.15    2.89
  -1 -11   1   36.05    3.68
   1 -11  -1   37.68    3.36
   1 -11  -1   37.54    3.76
   1 -11   0   -0.28    0.44
  -1 -11   0    1.25    0.67
   1  11   0   -0.40    1.06
  -1  11   0   -0.81    1.14
  -1 -11   0    0.84    0.37
   1  11   0    0.48    0.30
  -1  11   0    0.74    0.35
   1 -11   0   -0.53    0.60
  -1 -11   0   -0.88    1.00
  -1 -11   0    0.18    0.67
   1  11   1   23.28    2.83
   1 -11   1   20.79    2.06
  -1  11  -1   20.72    2.71
  -1  11  -1   21.01    2.09
   1  11   1   21.80    2.18
  -1 -11  -1   17.84    2.41
   1 -11   1   20.00    2.73
  -1 -11  -1   20.21    2.73
  -1  11  -2   59.20    3.59
   1  11   2   67.66    3.89
  -1  11  -2   64.99    4.89
   1  11   2   58.94    4.54
   1 -11   2   61.38    3.59
   1 -11   2   63.77    4.86
  -1 -11  -2   58.57    4.42
  -1 -11  -2   68.01    5.08
   1  11   3   20.21    2.11
  -1  11  -3   21.11    2.20
  -1  11  -3   25.51    3.17
   1 -11   3   16.89    1.92
   1  11   3   19.14    2.60
   1 -11   3   20.67    2.89
  -1 -11  -3   20.69    2.85
  -1 -11  -3   18.86    2.53
  -1  11  -4    2.16    0.70
   1  11   4    2.89    0.95
   1  11   4    1.53    0.69
   1 -11   4    3.59    0.90
  -1  11  -4    1.30    0.67
   1 -11   4    4.52    1.60
  -1 -11  -4    4.20    1.58
  -1 -11  -4    3.91    1.21
   1 -11   5  193.57    6.91
  -1  11  -5  190.12    6.88
   1  11   5  199.99    6.70
  -1  11  -5  192.96    8.59
   1  11   5  195.28    8.20
   1 -11   5  186.11    8.55
  -1 -11  -5  194.64    8.73
  -1 -11  -5  184.07    7.88
   1  11   6  110.57    4.94
  -1  11  -6  102.62    5.17
   1  11   6  107.32    6.10
  -1  11  -6  113.19    6.65
   1 -11   6   99.80    6.28
  -1 -11  -6  101.21    5.89
   1  11   7   57.39    3.57
  -1  11  -7   48.82    3.64
  -1  11  -7   50.61    4.45
   1  11   7   57.39    4.43
   1 -11   7   52.71    4.56
  -1 -11  -7   56.37    4.43
  -1  11  -8  170.51    6.93
   1  11   8  179.92    6.37
   1  11   8  172.46    7.74
  -1  11  -8  176.47    8.43
   1 -11   8  166.48    8.23
  -1 -11  -8  166.32    7.78
  -1  11  -9   43.05    3.55
   1  11   9   45.02    3.22
  -1  11  -9   47.92    4.40
   1  11   9   40.66    3.76
   1 -11   9   43.52    4.19
  -1 -11  -9   41.68    3.91
   1  11  10  378.91    9.41
  -1  11 -10  359.07   10.54
   1  11  10  351.61   11.03
   1 -11  10  352.01   12.07
  -1 -11 -10  344.38   11.31
   1  11  11    8.02    1.41
  -1  11 -11    9.43    1.74
   1  11  11    7.16    1.58
   1 -11  11    8.59    1.88
  -1 -11 -11   10.75    2.08
   1  11  12   74.87    4.31
  -1  11 -12   71.37    4.94
   1  11  12   68.24    4.84
   1 -11  12   75.51    5.75
  -1 -11 -12   76.67    5.47
  -1  11 -13   12.37    2.09
   1  11  13   11.63    1.76
   1  11  13   10.89    1.99
   1 -11  13   11.38    2.27
  -1 -11 -13   11.47    2.18
  -1  11 -14  130.87    6.98
   1  11  14  134.53    6.33
   1  11  14  142.06    6.16
   1  11  14  136.59    6.93
   1 -11  14  133.97    7.86
  -1 -11 -14  131.15    7.39
  -1  11 -15   14.29    2.34
   1  11  15   16.63    2.36
   1  11  15   15.08    2.34
   1 -11  15   16.59    2.89
  -1 -11 -15   17.84    2.73
  -1  11 -16  121.48    7.05
   1  11  16  128.04    6.46
   1  11  16  119.26    6.49
   1 -11  16  122.78    7.78
  -1 -11 -16  116.76    7.20
  -1  11 -17    3.17    1.35
   1  11  17    2.06    1.13
   1  11  17    2.73    0.83
   1 -11  17    1.74    1.11
  -1 -11 -17    2.32    1.06
   1  11  18  100.49    6.00
   1  11  18   96.06    5.79
  -1  11 -18   98.27    6.58
  -1 -11 -18   92.33    6.60
  -1  11 -19   19.44    3.06
  -1 -11 -19   15.90    2.76
  -1  11 -20   16.78    2.90
  -1  13  17    6.30    1.85
   1  13 -17    9.32    2.13
  -1  13  16   -0.93    1.14
   1  13 -16    0.19    0.49
   1 -13 -16    1.00    0.90
  -1  13  15   13.00    2.48
   1  13 -15   11.52    2.29
   1 -13 -15   11.51    2.38
  -1  13  14    8.00    1.90
   1  13 -14    7.42    1.92
   1 -13 -14    9.80    2.15
  -1  13  13    1.23    0.76
   1  13 -13    1.74    0.93
   1 -13 -13    2.50    1.27
  -1  13  12   19.12    2.97
   1  13 -12   22.66    2.96
   1 -13 -12   18.53    2.85
  -1  13  11   13.18    2.48
   1  13 -11   12.02    2.15
   1 -13 -11   12.35    2.52
   1 -13 -11   10.78    2.13
   1  13 -10  146.86    7.35
   1  13 -10  144.49    8.48
  -1  13  10  164.98    8.55
  -1 -13  10  138.95    8.41
   1 -13 -10  142.38    8.50
   1 -13 -10  133.51    7.56
   1  13  -9    1.32    0.46
   1  13  -9    2.90    1.41
  -1  13   9    1.13    1.23
  -1 -13   9    1.50    1.06
   1 -13  -9    0.79    0.90
   1 -13  -9   -0.44    1.02
   1  13  -8   68.36    4.82
   1  13  -8   68.96    5.82
  -1  13   8   72.66    5.68
  -1 -13   8   72.97    6.05
   1 -13  -8   72.97    5.95
   1 -13  -8   64.86    5.17
   1  13  -7    3.17    1.09
   1  13  -7    2.13    1.07
  -1  13   7    1.74    0.83
  -1 -13   7    2.74    1.37
   1 -13  -7    5.21    1.71
   1 -13  -7    2.04    1.02
   1  13  -6   63.42    4.47
   1  13  -6   65.59    5.59
  -1  13   6   64.27    5.30
  -1 -13   6   67.75    5.75
   1 -13  -6   53.83    4.64
   1 -13  -6   63.74    5.52
   1  13  -5    3.71    1.14
  -1  13   5    2.01    0.91
   1  13  -5    4.84    1.55
  -1 -13   5    5.44    1.79
   1 -13  -5   -0.46    0.91
   1 -13  -5    2.41    1.48
   1  13  -4  140.69    6.53
  -1  13   4  135.64    7.76
   1  13  -4  154.94    8.46
  -1 -13   4  136.33    8.13
   1 -13  -4  132.84    7.95
   1 -13  -4  127.30    7.07
   1  13  -3   66.39    4.38
  -1  13   3   67.61    5.52
   1  13  -3   66.39    5.54
  -1 -13   3   62.77    5.45
   1 -13  -3   56.74    5.15
   1 -13  -3   59.76    4.91
   1  13  -2  131.68    6.05
  -1  13   2  128.88    7.62
   1  13  -2  137.98    7.97
  -1 -13   2  128.81    7.86
   1 -13  -2  124.33    7.71
   1  13  -1    1.28    1.02
  -1  13   1    0.53    0.84
   1  13  -1    0.67    0.33
   1 -13  -1    0.39    0.67
  -1 -13   1   -0.23    0.63
   1  13   0   48.87    3.59
   1  13   0   51.79    4.82
  -1  13   0   45.16    4.47
   1 -13   0   43.63    4.54
  -1 -13   0   46.22    4.70
  -1  13  -1    0.33    0.76
   1  13   1   -0.74    0.99
  -1 -13  -1   -0.91    1.32
   1 -13   1   -0.63    0.88
   1  13   2    1.57    0.81
  -1  13  -2   -0.39    0.62
   1 -13   2    1.41    0.53
  -1 -13  -2    0.97    0.72
  -1 -13  -2    0.69    0.90
  -1  13  -3    5.74    1.67
   1  13   3    3.87    1.44
   1 -13   3    4.77    1.58
  -1 -13  -3    3.80    1.41
  -1 -13  -3    5.89    1.79
   1  13   4   38.05    4.13
  -1  13  -4   36.59    4.10
   1 -13   4   32.51    4.01
  -1 -13  -4   32.56    3.71
  -1 -13  -4   37.77    4.33
  -1  13  -5    6.53    1.37
  -1  13  -5    7.79    2.13
   1  13   5    7.42    1.88
   1 -13   5    5.86    1.69
  -1 -13  -5    5.14    1.43
  -1 -13  -5    8.50    2.09
  -1  13  -6   35.13    3.24
  -1  13  -6   37.47    4.15
   1  13   6   32.39    3.71
   1 -13   6   29.85    3.75
  -1 -13  -6   30.65    3.89
  -1 -13  -6   28.92    3.52
  -1  13  -7   30.47    3.06
  -1  13  -7   33.97    4.03
   1  13   7   31.10    3.71
   1 -13   7   26.56    3.57
  -1 -13  -7   26.83    3.59
  -1 -13  -7   27.08    3.43
  -1  13  -8   37.82    3.50
   1  13   8   30.80    3.66
  -1  13  -8   37.09    4.24
   1 -13   8   36.14    4.29
  -1 -13  -8   36.36    4.26
  -1 -13  -8   32.39    3.76
  -1  13  -9    1.35    0.84
  -1  13  -9    1.62    1.13
   1  13   9   -1.58    1.11
   1 -13   9    1.41    1.14
  -1 -13  -9   -0.72    0.99
  -1 -13  -9    0.76    0.63
   1  13  10  100.61    6.60
  -1  13 -10   98.27    5.89
  -1 -13 -10   93.17    6.51
   1  13  11   16.26    2.67
  -1  13 -11   15.92    2.52
  -1 -13 -11   13.35    2.43
   1  13  12   95.88    6.42
  -1  13 -12  105.96    6.35
  -1 -13 -12  103.16    6.98
   1  13  13    8.44    2.04
  -1  13 -13    6.05    1.64
  -1 -13 -13   10.34    2.30
   1  13  14  115.46    7.05
  -1  13 -14  115.13    6.93
  -1 -13 -14  117.98    7.62
   1  13  15   23.13    3.15
  -1  13 -15   23.03    3.13
   1  13  16   32.63    3.75
  -1  13 -16   34.41    3.98
   1 -15  -8  121.25    7.97
   1 -15  -7    2.90    0.67
   1 -15  -6   42.38    4.56
  -2   0  29    1.04    0.84
   2   0 -29    1.14    1.00
  -2   0  28  168.94    8.67
   2   0 -28  158.18    8.36
  -2   0  27    1.72    1.09
   2   0 -27   -0.21    0.69
  -2   0  26   24.72    3.11
   2   0 -26   27.81    3.34
  -2   0  25   -0.28    0.88
   2   0 -25    0.33    0.77
   2   0 -24    0.56    0.30
   2   0 -24    2.04    0.77
  -2   0  24   -0.14    0.55
   2   0 -24    1.02    0.84
   2   0 -23   -0.25    0.67
   2   0 -23    0.00    0.33
   2   0 -23   -0.16    0.28
  -2   0  23    0.32    0.72
   2   0 -23    1.02    0.69
   2   0 -22    4.42    0.86
   2   0 -22    4.98    1.34
   2   0 -22    5.15    0.67
  -2   0  22    5.56    1.32
   2   0 -22    5.00    1.18
   2   0 -21    0.65    0.42
   2   0 -21    0.09    0.55
  -2   0  21    0.99    0.76
   2   0 -21    0.05    0.40
   2   0 -20  371.33    7.23
   2   0 -20  374.93   10.15
  -2   0  20  370.11   10.17
   2   0 -20  378.26   10.13
   2   0 -19    1.35    0.60
   2   0 -19    0.21    0.76
  -2   0  19    1.51    0.76
   2   0 -19    2.02    0.84
   2   0 -19    0.77    0.65
  -2   0  18  302.66    8.71
   2   0 -18  281.04    6.00
   2   0 -18  287.29    8.32
   2   0 -18  313.40    8.34
  -2   0  18  289.63    8.36
   2   0 -18  286.27    8.30
  -2   0  17    4.06    1.13
   2   0 -17    0.97    0.62
   2   0 -17   -0.07    0.39
   2   0 -17    1.60    0.79
  -2   0  17    0.21    0.44
   2   0 -17    0.79    0.70
   2   0 -16 1230.85   11.84
   2   0 -16 1227.03   16.11
  -2   0  16 1320.49   16.85
  -2   0  16 1247.23   16.04
   2   0 -16 1290.74   15.69
   2   0 -16 1212.19   15.94
   2   0 -15    0.18    0.39
  -2   0  15    0.37    0.76
   2   0 -15    0.83    0.60
  -2   0  15    3.68    1.02
   2   0 -15    2.16    0.91
   2   0 -15    0.62    0.58
   2   0 -14 3460.49   18.74
  -2   0  14 3633.09   25.90
   2   0 -14 3591.75   25.30
   2   0 -14 3589.53   24.15
  -2   0  14 3501.36   25.12
   2   0 -14 3616.27   25.09
  -2   0  13    3.27    1.07
   2   0 -13    0.49    0.48
   2   0 -13    0.04    0.37
   2   0 -13    1.85    0.77
  -2   0  13    1.37    0.67
   2   0 -13    0.07    0.42
   2   0 -12 5669.70   22.36
   2   0 -12 5737.24   29.50
  -2   0  12 5835.97   29.71
  -2   0  12 5844.87   29.49
   2   0 -12 5747.11   27.74
   2   0 -11    5.14    0.88
   2   0 -11    0.32    0.39
  -2   0  11    3.41    1.00
  -2   0  11    0.33    0.32
   2   0 -11    0.05    0.30
   2   0 -10 1296.89   12.56
  -2   0  10 1303.17   12.67
   2   0 -10 1276.38    9.80
  -2   0  10 1292.37   12.63
   2   0 -10 1250.24   11.72
  -2   0   9    0.39    0.32
   2   0  -9   -0.26    0.37
   2   0  -9    0.93    0.39
   2   0  -9    0.11    0.32
  -2   0   9    0.49    0.35
  -2   0   8  457.06    6.63
   2   0  -8  465.34    6.61
   2   0  -8  446.91    5.28
   2   0  -8  440.89    5.95
  -2   0   8  453.49    6.54
   2   0  -7    1.55    0.51
   2   0  -7    0.46    0.23
  -2   0   7    0.91    0.39
  -2   0   7    1.21    0.35
  -2   0   7    0.86    0.32
  -2   0   6 4552.92   17.93
   2   0  -6 4615.62   17.82
   2   0  -6 4419.46   14.87
   2   0  -6 4686.96   15.92
  -2   0   6 4662.68   17.84
  -2   0   6 4502.76   15.76
  -2   0   6 4554.98   15.11
  -2   0   5    0.56    0.16
  -2   0   5    0.93    0.30
   2   0  -5    0.35    0.28
   2   0  -5    0.21    0.14
  -2   0   5    0.32    0.18
   2   0  -5    0.40    0.18
   2   0  -4   19.55    0.93
   2   0  -4   18.75    0.86
  -2   0   4   20.07    0.95
  -2   0   4   18.00    0.88
  -2   0   4   16.75    0.76
   2   0  -4   18.88    0.76
  -2   0   3    0.60    0.18
  -2   0   3    0.53    0.16
   2   0  -3    0.88    0.21
   2   0  -3    0.67    0.16
   2   0   1    0.63    0.16
  -2   0  -1    0.53    0.14
  -2   0  -1    0.72    0.21
   2   0   1    0.81    0.18
   2   0   2 1657.31    6.32
  -2   0  -2 1630.29    8.34
  -2   0  -2 1664.35    8.74
   2   0   2 1684.34    8.43
   2   0   2 1707.95    8.43
  -2   0  -2 1699.27    8.46
   2   0   3    1.00    0.28
   2   0   3    0.40    0.16
  -2   0  -3    1.04    0.28
   2   0   3    2.73    0.40
  -2   0  -3    0.18    0.19
  -2   0  -3    0.46    0.26
   2   0   3    2.13    0.35
   2   0   4 3783.72   16.52
  -2   0  -4 3731.54   10.03
  -2   0  -4 3696.14   15.82
  -2   0  -4 3834.51   16.47
   2   0   4 3873.97   16.03
  -2   0  -4 3938.87   16.27
   2   0   4 3737.87   15.80
   2   0   5    0.69    0.32
   2   0   5    1.20    0.26
  -2   0  -5    1.20    0.23
  -2   0  -5    1.00    0.35
  -2   0  -5    1.20    0.40
   2   0   5    0.84    0.39
  -2   0  -5    0.25    0.28
   2   0   6  138.95    3.75
  -2   0  -6  132.93    2.08
  -2   0  -6  134.81    3.61
   2   0   6  139.26    3.62
  -2   0  -6  143.06    3.71
  -2   0  -6  138.95    3.66
   2   0   7    0.18    0.37
  -2   0  -7    0.58    0.21
   2   0   7    2.15    0.67
  -2   0  -7    0.58    0.40
  -2   0  -7    0.60    0.39
  -2   0  -7    1.62    0.63
   2   0   8 1055.22   11.65
  -2   0  -8 1077.71    6.40
  -2   0  -8 1078.67   11.52
  -2   0  -8 1063.10   11.42
   2   0   8 1105.33   11.44
  -2   0  -8 1087.56   11.40
   2   0   9    0.07    0.35
  -2   0  -9    1.57    0.39
  -2   0  -9   -0.14    0.35
  -2   0  -9    0.51    0.37
   2   0   9    3.47    0.93
  -2   0  -9    1.97    0.74
   2   0  10 1044.28   12.79
  -2   0 -10  979.38    6.56
  -2   0 -10 1013.25   12.39
   2   0  10  987.25   12.10
  -2   0 -10  998.86   12.40
  -2   0 -10 1015.13   12.23
   2   0  11    0.19    0.30
  -2   0 -11    2.08    0.39
   2   0  11    2.81    0.99
  -2   0 -11    0.12    0.35
  -2   0 -11    0.37    0.39
  -2   0 -11    0.07    0.44
   2   0  12  978.63   13.65
  -2   0 -12  949.70    6.79
  -2   0 -12  998.65   13.42
  -2   0 -12  996.01   13.41
   2   0  12  976.16   13.14
  -2   0 -12  918.44   12.84
   2   0  13   -0.21    0.33
  -2   0 -13    0.00    0.18
  -2   0 -13    0.33    0.37
   2   0  13    1.50    0.74
  -2   0 -13    0.05    0.40
  -2   0 -13    0.76    0.49
   2   0  14   50.72    3.34
  -2   0 -14   49.45    1.60
  -2   0 -14   51.74    3.31
  -2   0 -14   51.51    3.34
   2   0  14   52.27    3.31
  -2   0 -14   48.68    3.18
   2   0  15   -0.72    0.48
  -2   0 -15    0.14    0.19
  -2   0 -15    0.44    0.42
   2   0  15    0.28    0.35
  -2   0 -15   -0.07    0.25
  -2   0 -15   -0.32    0.62
   2   0  16   27.11    2.62
  -2   0 -16   24.44    1.14
  -2   0 -16   26.62    2.52
   2   0  16   23.03    2.41
  -2   0 -16   22.78    2.32
  -2   0 -16   22.10    1.57
  -2   0 -17    0.77    0.28
   2   0  17    0.32    0.60
  -2   0 -17    0.53    0.39
  -2   0 -17    0.09    0.42
   2   0  18  266.37    8.60
  -2   0 -18  265.82    8.64
  -2   0 -18  258.40    5.58
   2   0  19   -0.23    0.55
  -2   0 -19    0.07    0.30
  -2   0 -19    0.12    0.42
  -2   0 -20    6.74    0.97
   2   0  20    5.81    1.41
  -2   0 -20    4.87    1.32
  -2   0 -21    0.67    0.46
   2   0  21    1.14    0.76
  -2   0 -21    1.20    0.74
  -2   0 -22  206.31    5.66
   2   0  22  216.21    8.73
  -2   0 -22  208.54    8.59
   2   0  23    6.97    1.78
  -2   0 -23    3.85    1.74
   2   0  24  633.30   15.87
  -2   0 -24  632.60   15.94
   2   0  25    5.00    1.72
  -2   0 -25    4.20    1.55
   2   0  26  134.00    7.67
  -2   0 -26  137.29    7.79
   2   0  27    5.00    1.55
  -2   0 -27    3.34    1.41
   2   2 -29   24.07    3.50
  -2  -2  29   20.81    3.11
  -2   2  29   27.64    3.64
   2   2 -29   23.01    3.27
   2  -2 -29   25.79    3.52
   2   2 -28  112.84    7.21
  -2  -2  28  116.48    7.23
  -2   2  28  119.68    7.32
   2   2 -28  121.48    7.34
   2  -2 -28  121.85    7.41
   2   2 -27   14.43    2.59
  -2  -2  27   17.21    2.74
  -2   2  27   12.33    2.39
   2   2 -27   13.46    2.43
   2  -2 -27   14.11    2.50
   2   2 -26    0.86    0.49
  -2   2  26    0.28    0.79
  -2  -2  26   -0.58    0.84
   2   2 -26    1.20    0.70
   2  -2 -26   -0.35    0.53
   2   2 -25    4.22    1.25
  -2   2  25    2.71    1.11
  -2  -2  25    3.98    1.35
   2   2 -25    4.31    1.53
   2  -2 -25    3.18    1.04
   2   2 -24   19.86    2.80
   2  -2 -24   17.10    1.99
   2  -2 -24   17.70    1.95
   2   2 -24   15.25    1.64
  -2  -2  24   14.73    2.48
  -2   2  24   17.08    2.48
   2  -2 -24   17.93    2.57
   2   2 -24   16.84    2.48
   2   2 -23   40.52    3.80
   2  -2 -23   34.64    2.66
   2   2 -23   37.40    2.46
  -2  -2  23   41.18    3.80
  -2   2  23   36.10    3.41
   2  -2 -23   35.27    3.43
   2   2 -23   35.82    3.50
   2  -2 -23   32.74    2.94
   2   2 -22   20.69    2.66
   2  -2 -22   17.73    1.92
  -2   2  22   23.73    2.78
  -2  -2  22   20.09    2.57
   2  -2 -22   21.23    2.64
   2   2 -22   21.85    2.62
   2  -2 -22   19.18    2.09
   2   2 -21   51.83    4.06
   2  -2 -21   48.77    3.03
  -2  -2  21   51.30    3.96
  -2   2  21   46.37    3.71
   2  -2 -21   49.63    3.84
   2  -2 -21   50.68    3.25
   2   2 -20    2.43    0.74
   2  -2 -20    3.04    0.70
  -2  -2  20    3.80    0.97
  -2   2  20    2.11    0.77
   2  -2 -20    2.89    0.79
   2  -2 -20    2.50    0.88
   2   2 -19   11.79    1.79
   2   2 -19    9.24    0.90
  -2   2  19   11.35    1.71
   2  -2 -19   10.05    1.28
  -2   2  19   10.13    1.58
  -2  -2  19   11.24    1.72
  -2  -2  19   11.07    1.74
   2  -2 -19   10.91    1.44
   2  -2 -19   10.06    1.58
  -2   2  18  575.81   11.61
   2   2 -18  539.28   11.93
   2   2 -18  523.50    6.25
   2  -2 -18  530.44    9.27
  -2   2  18  570.27   11.70
  -2  -2  18  553.11   11.91
  -2  -2  18  523.79   11.15
   2   2 -18  577.87   11.75
   2  -2 -18  570.07   11.44
   2  -2 -18  552.02   11.56
   2  -2 -18  537.54    9.92
  -2  -2  17   37.60    3.08
   2   2 -17   34.97    2.94
  -2   2  17   32.60    2.71
   2   2 -17   33.21    1.53
   2  -2 -17   38.11    2.45
   2  -2 -17   35.31    1.02
  -2  -2  17   35.75    2.81
   2   2 -17   36.77    2.89
   2  -2 -17   36.50    2.94
  -2   2  17   40.11    3.04
   2  -2 -17   36.05    2.78
  -2  -2  17   38.14    3.03
   2  -2 -17   38.77    3.01
   2  -2 -17   35.15    2.52
   2   2 -16 1654.62   19.53
  -2  -2  16 1725.56   20.23
  -2   2  16 1679.18   18.45
   2  -2 -16 1696.28    7.65
   2  -2 -16 1641.55   15.52
   2  -2 -16 1724.59   18.60
   2  -2 -16 1717.22   19.39
  -2  -2  16 1630.78   19.18
  -2   2  16 1667.45   18.63
   2   2 -16 1722.55   19.04
  -2  -2  16 1632.28   18.38
   2  -2 -16 1586.06   16.52
   2  -2 -16 1677.95   18.74
  -2  -2  15  404.05    9.45
  -2   2  15  389.13    8.50
   2   2 -15  382.76    9.10
   2  -2 -15  378.91    7.25
   2  -2 -15  388.45    3.84
   2  -2 -15  394.59    8.55
  -2  -2  15  375.73    8.88
   2   2 -15  405.32    8.88
  -2  -2  15  378.75    8.51
  -2   2  15  404.03    8.81
   2  -2 -15  400.46    8.95
   2  -2 -15  380.55    7.79
   2  -2 -15  400.04    8.81
   2   2 -14 1967.07   19.93
  -2  -2  14 2039.64   20.53
  -2   2  14 1939.18   18.21
   2  -2 -14 1939.27   15.90
   2  -2 -14 1997.57    8.88
   2  -2 -14 2041.85   19.48
   2   2 -14 2036.49   19.18
  -2  -2  14 1988.79   19.56
  -2  -2  14 1945.55   18.65
  -2   2  14 2014.23   18.91
   2  -2 -14 2010.91   18.93
   2  -2 -14 1928.80   17.14
  -2  -2  13  144.75    5.24
   2   2 -13  135.85    5.03
  -2   2  13  138.75    4.64
   2  -2 -13  132.86    4.06
   2  -2 -13  145.44    2.45
   2  -2 -13  136.54    4.86
  -2  -2  13  135.41    4.70
   2   2 -13  143.17    4.89
  -2   2  13  155.06    5.05
  -2  -2  13  141.04    5.05
   2  -2 -13  145.84    4.91
   2  -2 -13  134.78    4.42
  -2   2  12 2358.15   18.26
   2   2 -12 2398.26   20.30
  -2  -2  12 2480.37   20.92
   2  -2 -12 2433.68   10.08
   2  -2 -12 2339.54   16.50
   2  -2 -12 2437.92   19.49
  -2   2  12 2471.59   19.21
  -2  -2  12 2397.66   18.98
   2   2 -12 2410.74   19.37
   2  -2 -12 2371.24   18.01
  -2  -2  12 2383.56   11.26
   2  -2 -12 2438.92   19.16
  -2   2  11   98.52    3.48
   2   2 -11  104.80    4.08
  -2  -2  11  110.25    4.24
   2  -2 -11   95.35    3.24
   2  -2 -11  104.94    2.11
  -2   2  11  102.11    3.71
  -2  -2  11  100.81    3.73
   2  -2 -11   96.27    3.71
   2   2 -11  102.44    3.78
  -2  -2  11   97.90    2.23
   2  -2 -11  105.29    3.76
   2  -2 -11   96.85    3.57
  -2  -2  10  681.94    5.70
  -2  -2  10  684.30   10.12
   2   2 -10  672.18    9.98
  -2   2  10  695.91    8.73
   2  -2 -10  695.14    5.47
   2  -2 -10  671.26    8.34
   2  -2 -10  690.30    9.32
  -2  -2  10  692.11    9.38
   2   2 -10  699.29    9.46
  -2   2  10  701.77    9.27
  -2   2  10  683.16    9.15
   2  -2 -10  693.41    9.25
  -2   2   9   83.44    2.83
  -2  -2   9   79.20    1.90
  -2  -2   9   82.02    3.33
   2   2  -9   78.34    3.27
   2  -2  -9   80.64    1.90
   2  -2  -9   82.33    2.81
  -2   2   9   86.47    3.06
   2   2  -9   85.17    3.15
  -2  -2   9   81.98    3.08
   2  -2  -9   83.74    3.04
  -2   2   9   82.74    2.99
   2  -2  -9   81.56    3.01
   2   2  -8  294.87    5.98
  -2  -2   8  285.16    3.54
  -2   2   8  284.09    4.82
  -2  -2   8  295.20    5.98
   2  -2  -8  274.32    4.96
   2  -2  -8  293.16    3.64
   2   2  -8  285.69    5.54
  -2   2   8  289.13    5.31
   2  -2  -8  285.37    5.30
  -2  -2   8  289.05    5.49
   2  -2  -8  292.58    5.38
  -2   2   8  284.17    5.23
  -2  -2   7 1161.78   11.24
  -2  -2   7 1120.56    6.95
   2   2  -7 1151.00   11.26
  -2   2   7 1127.37    8.76
   2  -2  -7 1154.71    7.30
  -2   2   7 1164.07    9.83
   2  -2  -7 1114.26    9.59
  -2   2   7 1166.30    9.94
   2  -2  -7 1147.23    9.83
  -2  -2   7 1144.31   10.40
   2   2  -7 1153.39   10.47
  -2   2   7 1130.89    9.76
   2  -2  -7 1159.20    9.96
  -2   2   6   83.21    2.15
   2   2  -6   87.15    2.96
  -2  -2   6   90.58    2.97
   2  -2  -6   86.31    2.02
   2  -2  -6   84.29    2.57
  -2   2   6   90.39    2.67
   2  -2  -6   79.64    2.43
  -2   2   6   85.92    2.50
   2   2  -6   86.05    2.76
  -2  -2   6   86.26    2.71
  -2   2   6   82.53    2.48
   2  -2  -6   90.51    2.59
  -2  -2   5   17.21    1.27
   2   2  -5   17.75    1.27
  -2   2   5   15.68    0.83
   2  -2  -5   17.03    1.13
   2  -2  -5   15.02    0.88
  -2   2   5   16.10    1.11
  -2   2   5   15.18    0.99
   2  -2  -5   16.31    1.00
  -2  -2   5   16.03    1.13
   2   2  -5   16.08    1.16
   2  -2  -5   16.08    1.02
  -2   2   5   16.34    1.04
  -2  -2   4 3216.18   15.87
  -2   2   4 3156.33    9.46
   2   2  -4 3235.79   15.83
   2  -2  -4 3262.48   13.02
  -2   2   4 3332.40   15.16
   2  -2  -4 3222.60   15.01
   2  -2  -4 3241.88   12.79
  -2   2   4 3162.47   12.54
  -2  -2   4 3277.31   15.16
  -2   2   4 3225.12   12.90
   2   2  -4 3216.13   15.25
   2  -2  -4 3290.61   12.97
   2   2  -3   61.12    2.08
  -2  -2   3   56.58    1.99
  -2   2   3   57.26    1.95
   2  -2  -3   56.81    1.78
  -2   2   3   54.36    1.92
  -2   2   3   56.53    1.76
   2  -2  -3   50.56    1.95
  -2   2   3   55.68    1.53
   2  -2  -3   54.82    1.50
  -2   2   3   55.50    1.55
   2  -2  -3   56.81    1.57
   2   2  -3   57.23    1.97
  -2  -2   3   55.42    1.97
   2   2  -3   54.91    1.99
  -2  -2   2 1840.96   10.70
   2   2  -2 1809.19   10.71
  -2   2   2 1913.43   11.29
  -2   2   2 1854.23   10.33
  -2   2   2 1848.86   10.68
   2  -2  -2 1868.44   10.29
   2  -2  -2 1843.78   10.94
   2  -2  -2 1774.94   10.56
   2  -2  -2 1825.32    7.97
  -2   2   2 1807.08    8.20
  -2  -2   2 1805.81   11.05
   2  -2  -2 1836.34    8.29
  -2  -2   2 1826.99   10.87
   2   2  -2 1802.68   11.01
  -2   2   1   44.39    1.65
   2  -2  -1   43.74    1.62
   2  -2  -1   45.28    1.67
  -2  -2   1   40.64    1.57
   2  -2  -1   42.01    1.64
  -2   2   1   40.83    1.60
   2   2  -1   41.48    1.60
   2  -2  -1   43.72    1.27
  -2  -2   1   41.13    1.65
   2   2  -1   39.79    1.65
   2  -2  -1   43.66    1.57
  -2   2   1   41.85    1.25
  -2   2   0   25.35    0.88
   2  -2   0   25.35    1.28
   2   2   0   27.76    1.27
  -2  -2   0   25.10    1.23
  -2   2   0   23.52    1.25
  -2   2   0   25.93    1.28
   2  -2   0   37.54    1.51
  -2   2   0   24.77    1.25
  -2  -2   0   25.49    1.30
   2   2   0   26.37    1.32
  -2   2   0   22.69    0.99
   2  -2   1   31.47    1.18
  -2   2  -1   30.72    1.14
   2  -2   1   33.71    1.51
  -2   2  -1   30.51    1.44
   2   2   1   31.42    1.39
  -2  -2  -1   31.49    1.48
   2   2   1   32.65    1.48
   2  -2   1   30.86    1.46
  -2   2  -1   31.23    1.44
  -2  -2  -1   31.12    1.48
   2   2   1   32.14    1.50
   2  -2   1   29.96    1.13
   2  -2   2   70.58    2.02
  -2   2  -2   73.04    2.01
  -2   2  -2   72.64    2.27
   2  -2   2   74.05    2.32
   2  -2   2   73.55    2.30
  -2  -2  -2   72.29    2.34
   2   2   2   71.27    2.32
  -2   2  -2   74.61    2.34
   2  -2   2   68.82    1.55
  -2  -2  -2   74.54    2.38
   2   2   2   73.94    2.36
   2  -2   3  157.79    3.31
  -2   2  -3  160.73    3.34
   2   2   3  158.42    2.73
  -2   2  -3  150.28    3.40
   2  -2   3  157.42    3.61
  -2  -2  -3  153.87    3.54
   2   2   3  160.48    3.66
  -2   2  -3  153.53    3.57
   2  -2   3  149.77    2.01
   2   2   3  159.37    3.62
  -2  -2  -3  158.28    3.64
   2  -2   4  164.14    3.68
  -2   2  -4  174.73    3.78
   2   2   4  163.35    2.76
  -2   2  -4  161.83    3.61
   2   2   4  159.02    3.84
  -2   2  -4  168.43    3.91
   2  -2   4  166.97    3.92
  -2  -2  -4  164.24    3.85
  -2  -2  -4  165.46    3.91
   2   2   4  164.24    3.87
   2  -2   5  248.18    4.89
  -2   2  -5  236.88    4.80
  -2  -2  -5  229.25    3.38
  -2   2  -5  237.57    4.42
   2   2   5  234.40    3.36
   2   2   5  240.21    4.93
  -2   2  -5  237.76    4.93
   2  -2   5  245.05    5.01
  -2  -2  -5  240.44    4.94
  -2  -2  -5  243.94    5.00
   2   2   5  235.90    4.93
   2  -2   6 2101.58   15.16
  -2   2  -6 2079.66   15.13
  -2  -2  -6 2007.37   10.15
  -2   2  -6 2028.64   13.32
   2   2   6 2088.32   10.27
   2  -2   6 2081.79   15.36
  -2  -2  -6 2085.38   15.22
  -2   2  -6 2098.52   15.45
   2   2   6 2038.12   15.18
  -2  -2  -6 2098.38   15.43
   2   2   6 2077.06   15.24
  -2   2  -7 1103.57   11.77
   2  -2   7 1150.86   11.91
  -2   2  -7 1085.04   10.08
   2   2   7 1122.60    7.79
  -2  -2  -7 1061.22    7.72
  -2   2  -7 1124.34   11.88
   2   2   7 1095.58   11.75
  -2  -2  -7 1089.67   11.73
   2  -2   7 1107.51   11.22
   2  -2   7 1105.89   11.73
   2   2   7 1080.36   11.68
  -2  -2  -7 1108.67   11.89
   2   2   8  771.61    9.96
   2  -2   8  779.83   10.41
  -2   2  -8  760.16   10.29
  -2  -2  -8  749.23    6.74
  -2   2  -8  756.96    8.57
   2  -2   8  765.95    9.92
   2   2   8  755.97   10.15
  -2   2  -8  775.71   10.41
  -2  -2  -8  763.64   10.27
   2  -2   8  762.66   10.26
   2   2   8  782.64   10.36
  -2  -2  -8  775.99   10.34
  -2   2  -9   60.96    3.04
   2  -2   9   56.77    2.96
   2   2   9   59.32    2.89
  -2   2  -9   62.17    2.50
  -2  -2  -9   58.34    1.95
  -2   2  -9   70.85    3.25
   2  -2   9   60.82    3.03
  -2  -2  -9   62.82    3.11
   2  -2   9   64.60    3.03
   2   2   9   61.63    3.04
   2   2   9   61.79    3.06
  -2  -2  -9   59.94    3.01
  -2   2 -10  841.60   11.88
   2  -2  10  882.83   12.16
   2   2  10  853.93   11.52
  -2  -2 -10  811.50    7.58
  -2   2 -10  828.60    9.32
  -2  -2 -10  834.44   11.77
   2  -2  10  831.59   11.44
  -2   2 -10  859.15   11.91
   2  -2  10  855.78   11.82
   2   2  10  861.23   11.73
   2   2  10  866.51   11.84
  -2  -2 -10  842.42   11.75
  -2   2 -11    3.82    0.86
   2  -2  11    5.30    1.00
   2   2  11    5.70    0.97
  -2   2 -11    5.01    0.74
  -2  -2 -11    5.23    0.69
   2  -2  11    4.71    0.91
  -2   2 -11    5.68    1.02
  -2  -2 -11    5.70    0.99
   2  -2  11    4.75    0.84
   2   2  11    5.33    1.00
   2   2  11    5.79    1.06
  -2  -2 -11    5.72    1.04
   2   2  12  391.86    8.48
  -2   2 -12  379.35    8.62
   2  -2  12  394.71    8.88
  -2  -2 -12  376.82    5.52
  -2   2 -12  375.50    6.49
  -2   2 -12  385.67    8.67
   2  -2  12  367.19    8.43
   2  -2  12  381.80    8.37
  -2  -2 -12  398.97    8.73
   2   2  12  372.35    8.37
  -2  -2 -12  377.89    8.46
   2   2  12  394.39    8.69
  -2   2 -13  243.24    7.21
   2   2  13  254.27    7.16
   2  -2  13  268.04    7.60
  -2  -2 -13  237.29    4.56
  -2   2 -13  239.33    5.30
  -2  -2 -13  248.55    7.25
   2   2  13  254.93    7.20
   2  -2  13  248.18    7.07
  -2   2 -13  248.87    7.25
   2  -2  13  243.85    7.09
  -2  -2 -13  249.80    7.14
   2   2  13  245.26    7.04
   2   2  14  162.33    5.96
   2  -2  14  165.23    6.21
  -2   2 -14  149.99    5.86
  -2  -2 -14  146.09    3.73
  -2   2 -14  147.80    4.24
  -2   2 -14  163.19    6.07
  -2  -2 -14  159.88    5.91
   2  -2  14  151.30    5.79
   2  -2  14  154.04    5.77
  -2  -2 -14  155.48    5.95
   2   2  14  148.83    5.70
  -2  -2 -14  155.11    5.84
  -2   2 -15    4.43    1.00
   2   2  15    4.08    1.04
   2  -2  15    5.03    1.18
  -2  -2 -15    4.01    0.65
  -2   2 -15    4.66    0.81
  -2  -2 -15    3.08    0.84
  -2  -2 -15    4.20    1.00
   2  -2  15    3.17    0.83
  -2   2 -15    5.21    1.13
   2   2  15    4.86    1.13
   2  -2  15    4.57    1.02
  -2   2 -15    3.55    0.93
  -2  -2 -15    4.29    1.04
  -2   2 -16   12.00    1.83
   2   2  16   13.12    1.79
  -2  -2 -16   12.21    1.14
  -2   2 -16   12.72    1.27
   2  -2  16   14.62    1.95
   2  -2  16   14.07    1.88
   2   2  16   14.53    1.88
  -2   2 -16   17.01    2.08
  -2  -2 -16   13.93    1.86
  -2   2 -17   11.31    1.86
  -2   2 -17    8.74    1.07
  -2  -2 -17    8.13    0.93
   2   2  17    8.76    1.53
   2  -2  17    8.78    1.51
  -2  -2 -17    8.71    1.53
  -2   2 -17    9.01    1.53
  -2   2 -18  166.09    7.02
  -2   2 -18  164.28    4.68
  -2  -2 -18  160.22    4.40
   2  -2  18  168.64    6.90
   2   2  18  169.49    6.93
  -2  -2 -18  174.73    7.05
  -2   2 -18  160.15    6.76
  -2   2 -19   19.26    2.45
  -2   2 -19   22.64    1.76
  -2  -2 -19   25.23    1.78
   2  -2  19   23.73    2.66
   2   2  19   23.52    2.62
  -2  -2 -19   19.49    2.45
  -2   2 -19   23.79    2.67
  -2   2 -20    8.22    1.62
  -2   2 -20    8.67    1.11
  -2  -2 -20    9.99    1.16
   2  -2  20    7.99    1.48
   2   2  20    8.67    1.60
  -2  -2 -20    9.57    1.76
  -2   2 -20    8.50    1.58
  -2  -2 -20    9.18    1.34
  -2   2 -21    7.41    1.00
  -2  -2 -21    8.53    1.11
   2  -2  21    9.69    1.81
   2   2  21    9.48    1.83
  -2  -2 -21    9.66    1.81
  -2  -2 -21    8.04    1.37
  -2   2 -21    6.86    1.64
   2  -2  22   35.43    3.59
   2   2  22   34.57    3.57
  -2  -2 -22   32.05    3.43
  -2   2 -22   32.42    3.36
  -2  -2 -22   33.21    2.71
   2   2  23   16.22    2.57
   2  -2  23   16.33    2.57
  -2   2 -23   18.12    2.74
  -2  -2 -23   17.17    2.64
   2  -2  24  236.46    9.75
   2   2  24  239.81    9.83
  -2   2 -24  241.93    9.89
  -2  -2 -24  245.26    9.96
   2  -2  25   44.97    4.38
   2   2  25   46.13    4.45
  -2  -2 -25   47.98    4.56
  -2   2 -25   46.69    4.56
   2   2  26  202.83    9.55
   2  -2  26  195.61    9.41
  -2  -2 -26  206.08    9.66
  -2   2 -26  202.72    9.57
   2   2  27   12.03    2.59
   2  -2  27   13.16    2.71
  -2   2 -27   12.07    2.52
  -2  -2 -27   11.68    2.46
  -2   4  29    2.15    1.37
   2  -4 -29    2.15    1.25
   2   4 -28   36.06    4.26
  -2  -4  28   37.81    4.26
  -2   4  28   38.97    4.20
   2   4 -28   40.27    4.38
   2  -4 -28   37.91    4.15
   2   4 -27    1.04    0.95
  -2  -4  27    1.39    0.97
  -2   4  27    3.08    0.88
   2  -4 -27    2.13    1.00
   2   4 -27    2.38    1.06
   2   4 -26   12.00    2.38
  -2   4  26   11.45    2.16
  -2  -4  26    9.94    2.08
   2  -4 -26   10.01    2.02
   2   4 -26    8.69    1.86
   2   4 -25    0.18    0.79
  -2  -4  25   -0.44    0.53
  -2   4  25   -1.43    1.25
   2  -4 -25   -0.05    0.76
   2   4 -24   13.99    2.38
  -2  -4  24   16.20    2.59
  -2   4  24   17.21    2.55
  -2  -4  24   14.73    2.32
   2  -4 -24   16.54    2.50
   2   4 -23   26.16    3.17
   2  -4 -23   26.76    2.50
   2   4 -23   25.14    2.46
  -2  -4  23   26.69    3.08
  -2  -4  23   32.83    3.45
  -2   4  23   26.44    3.01
   2  -4 -23   29.41    3.20
   2   4 -22    9.27    1.88
   2  -4 -22    6.90    1.18
  -2   4  22    8.51    1.67
  -2  -4  22   10.05    1.90
  -2  -4  22    8.71    1.65
   2  -4 -22    7.41    1.58
   2   4 -21   82.77    5.38
   2  -4 -21   78.57    4.03
  -2  -4  21   76.33    5.00
  -2  -4  21   79.92    5.05
  -2   4  21   77.44    4.89
   2  -4 -21   79.55    4.98
   2   4 -20  108.78    6.02
   2  -4 -20  105.29    4.59
  -2  -4  20  106.37    5.81
  -2  -4  20  102.97    5.54
  -2   4  20  114.48    5.77
   2  -4 -20  114.00    5.79
  -2   4  19  249.06    7.85
   2   4 -19  239.75    8.64
   2  -4 -19  245.38    6.90
  -2  -4  19  239.17    8.22
  -2  -4  19  241.81    8.48
  -2   4  19  253.47    8.34
   2  -4 -19  256.45    8.39
   2  -4 -19  239.12    7.83
  -2   4  18  661.66   12.39
   2   4 -18  649.24   13.79
   2  -4 -18  642.08   10.94
  -2  -4  18  651.51   13.18
  -2  -4  18  642.98   13.44
  -2   4  18  649.36   12.91
   2  -4 -18  663.14   12.68
   2  -4 -18  662.80   13.07
   2   4 -17   -0.05    0.44
  -2   4  17    0.11    0.32
   2  -4 -17    0.05    0.42
  -2   4  17    0.42    0.56
  -2  -4  17    0.32    0.67
   2  -4 -17    0.42    0.53
   2  -4 -17    0.02    0.42
  -2   4  16  435.70    9.25
   2   4 -16  418.11   10.41
   2  -4 -16  417.82    8.51
   2   4 -16  448.79   10.47
  -2   4  16  421.11    9.75
   2  -4 -16  439.01   10.10
  -2  -4  16  408.57    9.89
  -2   4  16  420.96    9.80
   2  -4 -16  425.00    9.83
  -2  -4  15  135.71    5.84
   2   4 -15  124.22    5.52
  -2   4  15  124.12    4.75
   2  -4 -15  120.46    4.47
  -2   4  15  127.65    5.19
   2   4 -15  132.05    5.54
  -2  -4  15  122.13    5.23
   2  -4 -15  127.76    5.24
  -2  -4  15  123.43    2.11
   2  -4 -15  125.40    5.15
  -2   4  15  126.10    5.21
  -2   4  14 2054.64   18.49
  -2  -4  14 2204.80   22.75
   2   4 -14 2017.95   21.57
   2  -4 -14 2082.51   18.31
  -2   4  14 2083.72   20.30
   2  -4 -14 2135.01   20.69
   2   4 -14 2199.10   21.94
  -2  -4  14 2048.57   20.88
  -2  -4  14 2053.69    9.39
  -2   4  14 2077.92   20.46
   2  -4 -14 2089.30   20.46
   2   4 -13  543.67   10.85
  -2  -4  13  549.84    5.12
  -2  -4  13  588.93   11.38
  -2   4  13  556.02    9.17
   2  -4 -13  550.17    9.22
  -2   4  13  562.70   10.19
  -2  -4  13  560.57   10.61
   2  -4 -13  568.75   10.33
   2   4 -13  598.06   11.19
  -2   4  13  556.05   10.15
   2  -4 -13  560.50   10.22
  -2  -4  12 1014.73   14.50
  -2   4  12  953.33   11.40
  -2  -4  12  960.77    7.09
   2   4 -12  961.56   13.99
  -2   4  12  974.81   11.91
   2  -4 -12  947.61   11.86
   2   4 -12 1008.57   14.11
  -2  -4  12  962.81   13.48
  -2   4  12  972.73   12.86
   2  -4 -12  964.15   12.95
  -2   4  12  971.39   13.00
   2  -4 -12  971.43   12.95
  -2  -4  11  310.95    4.22
  -2  -4  11  326.13    7.95
   2   4 -11  302.35    7.53
  -2   4  11  307.50    6.12
   2  -4 -11  347.30    7.05
  -2   4  11  312.20    6.67
  -2   4  11  327.98    7.16
  -2  -4  11  328.26    7.64
   2  -4 -11  325.53    7.20
   2   4 -11  324.81    7.85
   2  -4 -11  308.91    7.07
  -2   4  11  313.03    7.11
  -2  -4  10 2022.54   19.09
  -2   4  10 1938.25   14.37
   2   4 -10 1895.18   18.37
  -2   4  10 1963.55   16.38
   2  -4 -10 1917.53   16.26
   2  -4 -10 1983.87   12.53
  -2  -4  10 1933.52   18.09
   2   4 -10 2040.39   18.70
  -2   4  10 1811.85   16.20
   2  -4 -10 1958.61   17.01
   2  -4 -10 1968.53   17.01
  -2   4  10 1923.26   16.94
   2   4  -9   51.35    2.92
  -2   4   9   52.88    2.23
  -2  -4   9   54.33    3.01
   2  -4  -9   53.32    2.69
  -2   4   9   53.78    2.67
   2  -4  -9   60.87    2.25
   2  -4  -9   51.35    2.62
   2   4  -9   55.72    3.01
  -2  -4   9   51.00    2.87
  -2   4   9   52.51    2.67
  -2   4   9   54.22    2.73
   2  -4  -9   51.48    2.66
  -2  -4   8  490.18    8.74
   2   4  -8  457.36    8.37
  -2   4   8  448.40    6.03
  -2   4   8  439.15    6.19
  -2   4   8  454.00    7.65
   2  -4  -8  452.62    7.76
   2  -4  -8  466.35    6.35
   2  -4  -8  456.60    7.46
  -2  -4   8  460.22    8.34
   2   4  -8  477.06    8.64
  -2   4   8  457.74    7.53
  -2   4   8  450.71    7.51
   2  -4  -8  460.65    7.58
  -2  -4   7   52.99    2.76
   2   4  -7   46.00    2.57
  -2   4   7   46.71    2.46
   2  -4  -7   50.05    2.15
  -2   4   7   47.41    2.08
   2  -4  -7   47.01    2.45
  -2  -4   7   48.38    2.62
   2  -4  -7   47.61    2.30
  -2   4   7   48.96    2.38
  -2   4   7   50.12    2.41
   2  -4  -7   48.49    2.38
   2   4  -7   47.92    2.67
   2   4  -6  167.85    4.73
  -2  -4   6  158.09    4.63
  -2   4   6  160.50    4.40
  -2   4   6  165.49    4.52
   2  -4  -6  160.50    3.85
  -2   4   6  151.24    3.78
   2  -4  -6  157.19    4.47
  -2  -4   6  158.91    4.68
  -2   4   6  154.15    4.05
   2  -4  -6  155.71    4.01
   2  -4  -6  156.84    4.10
   2   4  -6  156.01    4.64
  -2   4   6  159.76    4.13
   2   4  -6  151.93    4.70
   2   4  -5  113.63    3.75
  -2  -4   5  122.15    3.91
  -2   4   5  119.24    3.84
  -2   4   5  117.87    3.69
  -2   4   5  116.96    3.40
   2  -4  -5  118.54    3.84
  -2   4   5  118.73    2.50
  -2   4   5  117.92    3.38
  -2  -4   5  118.50    3.99
   2  -4  -5  116.71    3.34
   2   4  -5  111.84    3.99
  -2   4   5  115.02    3.38
   2   4  -5  116.18    3.96
   2  -4  -5  115.23    3.41
  -2  -4   4   12.10    1.21
   2   4  -4   11.28    1.16
  -2   4   4   11.59    1.16
  -2   4   4   11.61    1.11
   2  -4  -4   11.49    1.20
  -2   4   4   11.31    0.74
  -2   4   4   12.79    1.28
   2  -4  -4   11.72    1.06
   2   4  -4   10.45    1.25
   2  -4  -4   12.49    1.11
  -2  -4   4   10.94    1.23
  -2   4   4   11.82    1.07
   2   4  -4   10.94    1.20
  -2  -4   3  180.96    4.47
   2   4  -3  187.12    4.49
  -2   4   3  179.01    2.90
  -2   4   3  181.68    4.38
   2  -4  -3  190.07    4.75
  -2   4   3  177.32    4.33
  -2   4   3  195.86    4.84
   2  -4  -3  184.49    4.43
   2  -4  -3  184.90    3.96
  -2  -4   3  184.34    4.91
  -2  -4   3  184.86    4.75
   2   4  -3  189.72    4.79
   2  -4  -3  186.46    4.10
  -2   4   3  182.35    4.03
  -2  -4   2  338.59    5.81
  -2   4   2  344.41    4.10
   2   4  -2  341.37    5.91
   2  -4  -2  347.05    6.03
   2  -4  -2  345.71    3.99
  -2   4   2  351.96    6.18
  -2   4   2  368.92    6.60
   2  -4  -2  349.23    5.35
  -2  -4   2  348.76    6.63
   2   4  -2  344.94    6.40
  -2  -4   2  350.83    6.46
  -2   4   2  343.88    5.45
   2  -4  -2  350.34    6.42
   2  -4  -2  352.10    5.58
  -2   4   1  267.07    5.47
   2  -4  -1  254.46    5.15
  -2   4   1  256.61    5.72
  -2  -4   1  264.17    5.00
  -2   4   1  257.86    3.71
   2   4  -1  263.73    5.08
   2  -4  -1  260.88    3.71
  -2   4   1  261.41    4.77
  -2  -4   1  266.37    5.59
   2  -4  -1  266.33    4.84
   2   4  -1  263.29    5.52
   2  -4  -1  259.72    5.52
  -2  -4   0   49.28    1.81
  -2  -4   0   52.18    2.22
  -2   4   0   54.33    2.53
  -2   4   0   52.65    2.53
  -2   4   0   52.16    1.79
   2  -4   0   55.49    1.86
   2   4   0   52.51    2.25
   2  -4   0   49.54    2.53
  -2   4   0   52.46    2.16
   2  -4   0   53.45    2.20
  -2  -4   0   55.03    2.53
   2   4   0   51.83    2.46
   2  -4   1  588.77    6.51
  -2   4  -1  567.47    6.35
   2   4   1  580.89    7.42
  -2  -4  -1  569.75    6.12
  -2  -4  -1  582.25    7.32
  -2   4  -1  589.83    8.50
  -2   4  -1  591.11    8.44
  -2  -4  -1  572.64    8.15
   2  -4   1  589.76    8.48
  -2   4  -1  571.94    8.50
  -2  -4  -1  596.64    8.41
  -2   4  -1  583.07    7.37
   2   4   1  589.51    8.32
  -2   4  -2  795.82    8.09
   2  -4   2  812.27    8.23
   2   4   2  786.99    7.27
  -2   4  -2  804.05   10.06
   2   4   2  807.15    8.76
   2  -4   2  784.49    9.92
  -2  -4  -2  789.79    9.75
   2   4   2  797.19    9.82
  -2   4  -2  792.88    8.87
  -2  -4  -2  780.43    9.78
  -2   4  -2  792.28   10.08
  -2   4  -3  304.25    5.33
   2  -4   3  318.07    5.49
   2   4   3  320.59    5.77
   2   4   3  315.56    5.59
   2   4   3  311.74    4.77
  -2   4  -3  313.94    6.42
   2  -4   3  309.26    6.40
  -2  -4  -3  317.23    6.28
  -2   4  -3  311.39    5.75
   2   4   3  314.94    6.30
  -2   4  -3  312.69    6.46
  -2  -4  -3  323.41    6.42
  -2   4  -4 1244.92   11.49
   2  -4   4 1285.88   11.70
  -2   4  -4 1241.99   12.93
   2   4   4 1262.20   11.49
   2   4   4 1248.00   11.40
   2   4   4 1267.81   10.12
  -2  -4  -4 1254.23   12.83
  -2   4  -4 1266.53   13.44
   2   4   4 1265.21   12.88
   2  -4   4 1280.78   13.25
  -2  -4  -4 1275.99   13.02
   2   4   4 1229.88   12.86
  -2   4  -5  341.77    6.35
   2  -4   5  351.87    6.49
  -2   4  -5  330.35    6.81
   2   4   5  349.72    6.00
   2   4   5  339.80    6.88
  -2  -4  -5  339.85    6.84
  -2   4  -5  350.73    7.21
   2  -4   5  352.84    7.16
   2   4   5  340.68    6.93
  -2  -4  -5  346.42    6.97
   2  -4   6 2823.55   19.33
  -2   4  -6 2699.69   18.86
  -2   4  -6 2760.74   19.95
   2   4   6 2722.48   16.75
   2   4   6 2780.30   20.23
   2  -4   6 2730.60   20.55
  -2   4  -6 2803.61   20.99
  -2  -4  -6 2731.77   20.23
   2  -4   6 2638.75   11.45
  -2  -4  -6 2751.94   20.30
   2   4   6 2726.21   20.28
   2  -4   7    6.09    1.00
  -2   4  -7    5.15    0.90
  -2   4  -7    9.39    1.32
   2   4   7    4.70    0.62
   2   4   7    5.54    0.76
  -2   4  -7    5.26    0.93
   2   4   7    5.35    0.95
  -2  -4  -7    5.91    0.99
   2  -4   7    6.39    1.07
   2  -4   7    5.79    0.49
   2   4   7    5.68    0.97
  -2  -4  -7   16.29    1.64
   2  -4   8  615.44    3.94
  -2   4  -8  613.03    9.89
   2  -4   8  635.99   10.17
  -2   4  -8  652.58   10.05
   2   4   8  617.41    6.19
  -2  -4  -8  606.08    8.06
   2   4   8  632.21    8.09
  -2  -4  -8  655.62   10.50
   2  -4   8  617.80   10.43
   2   4   8  641.78   10.36
  -2   4  -8  635.62   10.68
  -2  -4  -8  645.02   10.40
   2   4   8  641.59   10.47
   2  -4   9   30.33    2.32
  -2   4  -9   29.91    2.25
   2   4   9   25.58    1.18
  -2   4  -9   28.17    2.11
  -2  -4  -9   27.11    1.76
   2   4   9   28.96    1.76
   2  -4   9   26.21    2.22
   2   4   9   26.60    2.18
  -2   4  -9   27.71    2.29
  -2  -4  -9   26.14    2.20
   2   4   9   30.36    2.34
  -2  -4  -9   26.65    2.20
   2  -4  10 1276.12   15.66
  -2   4 -10 1236.16   15.24
  -2  -4 -10 1212.62   11.73
   2   4  10 1184.14    7.23
  -2   4 -10 1188.21   14.11
   2   4  10 1242.13   11.72
   2  -4  10 1243.02   15.66
  -2   4 -10 1274.53   16.13
   2   4  10 1228.48   15.25
  -2  -4 -10 1283.84   15.62
  -2  -4 -10 1245.75   15.48
   2   4  10 1286.41   15.76
  -2   4 -11   58.16    3.47
   2  -4  11   62.88    3.61
   2   4  11   59.25    3.24
   2   4  11   62.05    2.62
  -2  -4 -11   59.50    2.64
  -2   4 -11   62.42    3.25
  -2   4 -11   64.46    3.69
  -2  -4 -11   65.00    3.64
   2   4  11   61.94    3.55
   2  -4  11   59.76    3.54
  -2  -4 -11   61.19    3.52
   2   4  11   64.23    3.66
   2   4  12  186.62    5.93
   2  -4  12  194.56    6.58
  -2   4 -12  181.75    6.32
  -2   4 -12  180.57    5.65
  -2  -4 -12  181.64    4.64
  -2   4 -12  193.99    6.63
   2  -4  12  180.61    6.33
  -2  -4 -12  196.84    6.53
   2   4  12  184.53    6.28
   2  -4  12  180.89    6.09
   2   4  12  197.14    6.58
  -2  -4 -12  186.27    6.37
   2   4  13   22.17    2.15
  -2   4 -13   22.29    2.27
   2  -4  13   25.56    2.48
  -2   4 -13   22.80    2.02
  -2  -4 -13   20.23    1.60
   2  -4  13   22.80    2.29
   2   4  13   22.82    2.30
  -2  -4 -13   24.98    2.41
   2  -4  13   22.98    2.36
  -2   4 -13   23.89    2.38
   2   4  13   22.17    2.22
  -2  -4 -13   22.76    2.30
   2   4  14  313.32    8.36
  -2   4 -14  304.97    8.73
   2  -4  14  323.55    9.11
  -2  -4 -14  299.64    6.18
  -2   4 -14  298.90    7.48
   2   4  14  306.82    8.62
   2  -4  14  302.51    8.41
   2  -4  14  300.29    8.67
  -2  -4 -14  300.53    8.60
   2   4  15   23.38    2.34
  -2   4 -15   22.71    2.43
  -2   4 -15   22.36    2.09
  -2  -4 -15   20.83    1.69
   2  -4  15   21.97    2.38
   2  -4  15   20.86    2.36
   2   4  15   21.66    2.38
  -2  -4 -15   21.02    2.34
  -2   4 -16   15.18    2.11
   2   4  16   15.04    1.97
  -2   4 -16   14.53    1.72
  -2  -4 -16   11.54    1.23
   2  -4  16   15.59    2.11
   2   4  16   13.62    1.90
   2  -4  16   13.62    2.01
  -2  -4 -16   14.85    1.99
  -2   4 -17    5.35    1.39
  -2   4 -17    1.28    0.55
  -2  -4 -17    5.10    0.88
   2  -4  17    3.27    1.04
   2  -4  17    2.90    0.91
   2   4  17    6.49    1.39
  -2  -4 -17    2.94    0.97
  -2   4 -18  190.99    7.86
  -2   4 -18  201.07    6.46
  -2  -4 -18  200.01    5.38
   2  -4  18  202.26    7.95
   2  -4  18  206.13    7.86
   2   4  18  210.36    7.97
  -2  -4 -18  205.69    7.90
  -2   4 -19    9.24    1.74
  -2  -4 -19    9.39    1.20
  -2   4 -19    9.48    1.37
   2   4  19   10.94    1.83
   2  -4  19    8.78    1.67
   2  -4  19    9.94    1.88
  -2  -4 -19   10.26    1.83
  -2   4 -20  158.83    7.51
  -2  -4 -20  150.86    4.80
  -2   4 -20  148.66    5.65
   2   4  20  156.72    7.30
   2  -4  20  154.09    7.21
   2  -4  20  160.00    7.46
  -2  -4 -20  155.25    7.28
  -2   4 -21    1.94    0.83
  -2   4 -21    1.69    0.67
   2  -4  21    2.48    1.02
   2   4  21    1.39    0.86
   2  -4  21    1.09    0.90
  -2   4 -21    2.59    1.09
  -2  -4 -21    1.13    0.90
  -2   4 -22  358.85   11.93
   2  -4  22  365.98   11.84
   2   4  22  366.56   11.79
   2  -4  22  364.84   11.70
  -2  -4 -22  367.88   11.86
  -2   4 -22  347.89   11.44
  -2   4 -23    6.44    1.71
   2  -4  23    5.40    1.64
   2   4  23    7.11    1.71
  -2   4 -23    5.42    1.43
  -2  -4 -23    7.53    1.74
  -2   4 -24  129.92    7.56
   2  -4  24  125.26    7.30
   2   4  24  131.65    7.41
  -2   4 -24  132.49    7.48
  -2  -4 -24  125.95    7.30
  -2   4 -25   -0.19    0.56
   2   4  25    2.36    1.21
   2  -4  25    0.05    0.86
  -2   4 -25    0.07    0.84
  -2  -4 -25   -0.56    0.90
   2  -4  26  213.87   10.03
   2   4  26  224.68   10.20
  -2  -4 -26  217.87   10.12
  -2   4 -26  212.82    9.94
   2  -4  27    4.10    1.51
  -2   6  28   70.25    5.82
   2  -6 -28   71.87    5.93
   2   6 -27    2.09    0.83
  -2   6  27    3.08    1.20
  -2  -6  27    2.94    1.34
  -2  -6  27    2.36    0.99
   2  -6 -27    3.18    1.32
   2   6 -26    0.95    0.48
  -2  -6  26    1.13    0.74
  -2   6  26    1.97    0.79
  -2  -6  26    0.84    0.90
   2  -6 -26    1.21    1.09
   2   6 -25    1.43    0.74
  -2  -6  25    1.57    1.04
  -2   6  25    1.79    0.90
  -2  -6  25    1.58    0.56
   2  -6 -25    0.02    0.84
   2   6 -24   73.87    5.74
  -2  -6  24   74.33    5.59
  -2  -6  24   77.44    5.77
  -2   6  24   78.64    5.58
   2  -6 -24   69.39    5.23
   2   6 -23   64.34    5.21
  -2   6  23   63.05    4.89
  -2  -6  23   60.68    5.05
  -2  -6  23   58.67    4.86
   2  -6 -23   67.33    5.05
   2   6 -22   25.74    3.29
  -2  -6  22   26.18    3.22
  -2  -6  22   26.32    3.15
  -2   6  22   28.13    3.20
   2  -6 -22   24.33    2.99
   2   6 -21   13.86    2.32
   2  -6 -21   10.61    1.69
  -2   6  21   11.44    1.95
  -2  -6  21   11.19    1.97
  -2  -6  21   12.28    2.09
   2  -6 -21   13.42    2.18
   2   6 -20  293.62   10.33
   2  -6 -20  278.35    8.22
  -2   6  20  294.75    9.68
  -2  -6  20  288.84    9.96
   2  -6 -20  286.27    9.62
  -2   6  19  177.67    6.61
   2   6 -19  171.09    7.71
   2  -6 -19  174.13    6.39
  -2   6  19  190.84    7.56
  -2  -6  19  172.88    7.51
   2  -6 -19  178.20    7.35
  -2   6  18  371.06    9.22
   2   6 -18  364.26   10.91
   2  -6 -18  363.75    9.13
  -2   6  18  372.15   10.33
  -2  -6  18  364.06   10.66
   2  -6 -18  361.12   10.24
  -2   6  17    3.15    0.91
   2   6 -17    4.10    1.21
   2  -6 -17    3.69    0.95
  -2   6  17    1.92    0.74
  -2  -6  17    3.17    0.91
   2  -6 -17    1.51    0.65
  -2  -6  16  383.15    3.85
   2   6 -16  367.77   10.36
  -2   6  16  372.51    8.60
   2  -6 -16  388.08    9.18
  -2  -6  16  368.72   10.27
  -2   6  16  364.73    9.75
   2  -6 -16  370.10    9.83
  -2   6  15    1.04    0.56
  -2  -6  15    1.09    0.30
   2   6 -15    0.93    0.70
  -2   6  15    1.13    0.65
   2  -6 -15    1.97    0.84
  -2   6  15    0.95    0.63
  -2  -6  15    0.65    0.48
   2  -6 -15    0.46    0.39
  -2   6  15    1.18    0.72
  -2   6  14  650.51   10.45
  -2  -6  14  670.42    6.79
   2   6 -14  660.30   13.21
   2  -6 -14  672.30   11.80
  -2   6  14  658.39   11.52
  -2  -6  14  644.15   13.04
  -2   6  14  666.51   12.46
   2  -6 -14  683.47   12.54
   2  -6 -14  659.51   12.39
  -2   6  14  675.66   12.60
  -2  -6  13  164.60    6.53
   2   6 -13  149.29    6.16
  -2   6  13  152.76    4.86
   2  -6 -13  157.28    5.66
  -2   6  13  149.38    5.51
  -2  -6  13  139.35    5.95
   2  -6 -13  151.51    5.75
  -2   6  13  145.47    5.63
   2  -6 -13  148.64    5.74
  -2   6  13  154.74    5.88
   2   6 -12  912.18   14.67
  -2   6  12  922.42   11.42
  -2  -6  12 1020.20   15.80
   2  -6 -12  916.95   13.60
  -2   6  12  948.15   13.62
  -2   6  12  928.98   13.78
  -2  -6  12  913.80   14.90
   2  -6 -12  956.60   14.04
   2   6 -12  992.61   15.82
  -2   6  12  955.86   14.16
   2  -6 -12  925.99   13.86
   2   6 -11  263.64    7.71
  -2   6  11  259.46    5.77
  -2  -6  11  282.19    8.08
  -2   6  11  265.82    7.13
  -2   6  11  263.06    5.75
  -2   6  11  270.24    7.28
   2  -6 -11  268.66    7.28
  -2  -6  11  253.76    7.67
   2  -6 -11  269.11    7.23
  -2   6  11  269.10    7.23
  -2   6  11  269.03    7.30
   2  -6 -11  267.27    7.28
   2   6 -11  278.02    8.20
   2   6 -10 1141.13   15.68
  -2  -6  10 1227.81   16.34
   2  -6 -10 1166.67   15.06
  -2   6  10 1188.03   14.87
  -2   6  10 1122.20   12.10
  -2   6  10 1175.89   14.81
   2  -6 -10 1180.15   14.67
  -2   6  10 1164.49   14.57
  -2  -6  10 1154.62   16.06
   2   6 -10 1220.75   16.63
   2   6 -10 1251.24   17.14
  -2   6  10 1184.99   14.87
   2  -6 -10 1188.84   14.85
   2   6  -9  116.64    4.86
  -2  -6   9  119.82    4.96
  -2   6   9  117.41    4.56
  -2   6   9  120.30    4.71
  -2   6   9  117.66    3.98
  -2   6   9  119.23    3.55
   2  -6  -9  116.60    4.73
  -2   6   9  137.64    4.89
  -2  -6   9  119.01    5.10
   2  -6  -9  116.99    4.47
   2  -6  -9  118.42    4.57
   2   6  -9  123.99    5.19
   2   6  -9  128.73    5.38
  -2   6   9  116.69    4.56
   2   6  -8  237.66    6.76
  -2  -6   8  244.71    6.93
   2  -6  -8  198.66    6.09
  -2   6   8  239.37    6.40
  -2   6   8  231.50    5.70
  -2   6   8  231.13    6.54
  -2   6   8  238.77    4.82
  -2   6   8  232.61    6.16
  -2  -6   8  242.18    7.11
   2  -6  -8  236.80    6.23
  -2   6   8  234.81    6.28
   2   6  -8  244.70    7.14
   2   6  -8  248.50    7.39
   2  -6  -8  231.48    6.26
   2   6  -7   84.09    3.89
  -2  -6   7   89.83    4.06
  -2   6   7   84.80    3.75
  -2   6   7   88.63    2.81
  -2   6   7   81.42    3.45
  -2   6   7   90.80    4.06
  -2  -6   7   79.10    4.05
   2  -6  -7   83.93    3.59
   2   6  -7   87.52    4.19
  -2   6   7   87.52    3.75
   2   6  -7   85.68    4.33
   2  -6  -7   86.59    3.75
  -2   6   6  220.81    4.35
   2   6  -6  205.82    5.93
  -2  -6   6  223.30    6.23
  -2   6   6  221.79    5.93
  -2   6   6  218.83    5.68
  -2   6   6  217.73    6.28
   2  -6  -6  221.98    5.72
  -2  -6   6  216.07    6.54
  -2   6   6  216.69    5.75
   2   6  -6  235.95    6.70
   2   6  -6  214.21    6.67
   2  -6  -6  217.88    5.82
  -2  -6   5  308.40    7.09
  -2   6   5  313.04    5.07
   2   6  -5  297.81    6.93
  -2   6   5  305.71    7.42
  -2   6   5  305.71    6.84
  -2   6   5  303.68    6.77
  -2  -6   5  300.68    7.69
   2  -6  -5  299.81    6.53
   2   6  -5  308.56    7.56
  -2   6   5  301.26    6.65
   2  -6  -5  302.96    6.77
   2   6  -4   40.04    2.50
  -2  -6   4   40.64    2.50
  -2   6   4   41.04    1.83
  -2   6   4   39.02    2.69
   2  -6  -4   43.15    2.59
  -2   6   4   42.94    2.59
   2  -6  -4   44.21    2.48
  -2   6   4   42.01    2.45
  -2  -6   4   38.81    2.76
   2  -6  -4   44.09    2.55
   2   6  -4   40.36    2.73
   2   6  -3   68.98    3.22
  -2   6   3   70.42    2.41
  -2  -6   3   67.77    3.15
   2  -6  -3   72.71    3.36
  -2   6   3   69.12    3.50
  -2   6   3   72.85    3.41
   2  -6  -3   71.62    3.10
  -2  -6   3   73.45    3.59
  -2  -6   3   69.56    3.64
   2  -6  -3   72.15    3.64
  -2   6   3   70.56    3.13
   2   6  -3   72.25    3.59
   2  -6  -3   72.36    3.20
  -2   6   2   49.59    2.06
   2   6  -2   51.26    2.71
   2  -6  -2   49.40    2.73
   2  -6  -2   50.84    2.02
  -2   6   2   49.38    2.83
  -2   6   2   50.10    2.97
  -2  -6   2   51.26    2.67
   2  -6  -2   48.12    2.55
   2  -6  -2   48.94    2.99
   2  -6  -2   47.99    2.62
  -2   6   2   46.29    2.53
  -2  -6   2   47.39    3.01
  -2  -6   2   48.10    2.90
   2   6  -2   54.50    3.10
  -2  -6   1  127.90    4.12
   2  -6  -1  123.55    4.35
  -2  -6   1  118.45    3.66
  -2   6   1  136.57    4.94
   2  -6  -1  123.50    3.29
  -2   6   1  126.60    4.61
   2   6  -1  123.38    4.13
  -2   6   1  124.93    3.34
  -2  -6   1  130.03    4.75
   2  -6  -1  121.07    4.68
   2  -6  -1  123.04    4.17
   2   6  -1  125.54    4.68
  -2   6   1  129.22    4.26
  -2  -6   1  123.75    4.86
  -2  -6   0  254.69    5.26
  -2  -6   0  258.51    5.81
  -2   6   0  273.76    6.93
  -2   6   0  274.36    7.07
   2  -6   0  266.60    6.39
   2  -6   0  266.19    5.05
  -2   6   0  262.43    5.05
   2   6   0  262.71    5.98
   2  -6   0  264.58    6.18
  -2  -6   0  267.37    6.77
   2  -6   0  265.09    6.97
   2   6   0  265.77    6.77
  -2   6   0  262.71    6.14
   2  -6   1    6.72    0.86
   2   6   1    6.61    0.95
  -2   6  -1    6.95    0.86
  -2   6  -1    6.72    1.14
  -2  -6  -1    5.91    0.83
  -2  -6  -1    5.93    0.86
  -2   6  -1    5.79    0.97
  -2  -6  -1    7.93    1.23
  -2  -6  -1    6.35    1.07
   2   6   1    6.33    1.06
   2  -6   1    7.49    1.21
  -2   6  -1    6.47    1.02
  -2   6  -2  179.04    4.52
   2  -6   2  180.03    4.57
   2   6   2  185.60    4.96
  -2   6  -2  178.90    5.75
  -2   6  -2  188.17    5.91
   2   6   2  184.78    5.51
   2  -6   2  184.27    5.86
  -2  -6  -2  192.32    5.72
  -2  -6  -2  182.52    5.66
  -2   6  -2  180.75    5.21
   2   6   2  184.95    5.68
   2  -6   3    9.98    1.18
  -2   6  -3    9.54    1.14
   2   6   3   11.45    1.39
  -2   6  -3   12.12    1.57
   2   6   3    9.18    1.09
  -2  -6  -3   11.77    1.44
   2  -6   3   10.08    1.39
   2   6   3    9.08    1.28
  -2   6  -3    9.75    1.21
  -2   6  -3   12.93    1.62
  -2  -6  -3   10.15    1.35
   2  -6   4 2059.18   16.98
  -2   6  -4 2043.24   16.63
   2   6   4 2047.40   15.24
  -2   6  -4 2079.71   20.13
   2   6   4 2094.26   18.53
   2   6   4 2091.55   16.85
  -2  -6  -4 2114.85   19.56
   2  -6   4 2040.08   20.11
  -2   6  -4 2047.80   18.35
   2   6   4 2085.47   19.56
  -2   6  -4 2154.87   20.86
  -2  -6  -4 2053.92   19.39
   2  -6   5    6.26    0.99
  -2   6  -5    5.70    0.95
   2   6   5    5.65    0.90
   2   6   5    6.65    0.97
   2   6   5    5.45    0.84
  -2   6  -5    8.64    1.43
   2   6   5    5.24    0.93
  -2  -6  -5    6.18    1.13
   2  -6   5    4.08    0.93
  -2   6  -5    5.01    0.93
  -2  -6  -5    6.07    1.13
  -2   6  -5    4.84    1.00
   2   6   5    6.23    1.11
   2  -6   6  987.54   12.75
  -2   6  -6  923.89   12.16
  -2   6  -6  967.15   14.09
   2   6   6  904.26   11.00
   2   6   6  934.82   11.00
   2   6   6  967.61   12.54
   2   6   6  965.69   11.86
   2  -6   6  929.61   13.99
  -2  -6  -6  969.02   13.65
   2   6   6  962.97   13.74
  -2   6  -6  955.03   13.09
  -2   6  -6  975.95   14.65
  -2  -6  -6  942.12   13.58
  -2   6  -7   26.79    2.15
   2  -6   7   28.85    2.27
   2   6   7   27.37    1.86
   2   6   7   29.36    2.01
  -2   6  -7   31.19    2.60
   2   6   7   30.21    2.16
   2   6   7   27.88    2.15
  -2  -6  -7   28.69    2.39
   2  -6   7   29.64    2.53
   2   6   7   29.08    2.41
  -2   6  -7   30.29    2.57
  -2  -6  -7   31.70    2.57
   2   6   7   28.34    2.43
   2  -6   8  762.13   12.07
  -2   6  -8  719.66   11.61
   2   6   8  736.09   10.38
   2   6   8  750.75   11.05
   2   6   8  744.61   10.98
  -2   6  -8  739.21   12.61
   2   6   8  718.13    9.34
   2  -6   8  713.79   12.75
   2   6   8  735.71   12.42
  -2  -6  -8  769.85   12.65
  -2  -6  -8  735.34   12.46
   2   6   8  761.58   12.75
  -2   6  -8  786.32   13.63
   2  -6   9   10.43    1.51
  -2   6  -9    8.55    1.32
  -2   6  -9    8.94    1.46
   2   6   9    7.95    0.95
   2   6   9   10.24    1.27
  -2  -6  -9    9.68    1.46
   2   6   9    9.22    1.39
   2  -6   9    8.97    1.44
  -2   6  -9    9.25    1.57
   2   6   9    9.50    1.50
   2  -6   9    9.39    0.84
  -2  -6  -9    8.95    1.43
   2  -6  10  119.88    5.15
  -2   6 -10  114.56    4.94
  -2   6 -10  121.21    5.26
   2   6  10  118.05    4.40
   2   6  10  115.43    3.47
   2  -6  10  120.79    5.45
   2   6  10  120.63    5.26
  -2   6 -10  122.90    5.63
  -2  -6 -10  128.87    5.44
   2   6  10  124.91    5.38
  -2  -6 -10  117.87    5.28
   2  -6  10  113.40    2.53
   2  -6  11  156.72    6.10
   2  -6  11  145.68    2.32
  -2   6 -11  143.89    5.74
   2   6  11  143.08    3.73
   2   6  11  151.54    5.01
  -2   6 -11  146.39    5.88
  -2  -6 -11  154.25    6.10
   2   6  11  147.41    6.00
   2  -6  11  140.21    6.03
   2   6  11  151.37    6.10
  -2  -6 -11  146.90    6.00
  -2   6 -12  540.16   11.49
   2  -6  12  579.55   12.09
   2   6  12  550.46    9.61
  -2   6 -12  540.38   11.42
   2   6  12  532.49    6.76
   2   6  12  538.51   11.73
   2  -6  12  531.49   11.95
  -2  -6 -12  539.34   11.73
   2   6  13    1.79    0.70
  -2   6 -13    2.55    0.83
   2   6  13    1.58    0.42
  -2   6 -13    0.53    0.35
   2  -6  13    2.30    0.83
   2   6  13    1.25    0.60
  -2  -6 -13    1.43    0.63
   2   6  14  101.56    4.86
  -2   6 -14   99.96    5.28
   2   6  14  105.59    4.29
   2   6  14   97.39    5.24
   2  -6  14  109.53    5.74
  -2  -6 -14  103.69    5.40
   2   6  15   18.33    2.13
  -2   6 -15   19.33    2.34
   2  -6  15   16.15    2.25
   2   6  15   20.86    2.53
  -2  -6 -15   22.17    2.62
  -2   6 -16   -0.30    0.60
   2   6  16   -0.32    0.62
   2  -6  16    0.14    0.42
   2  -6  16   -0.51    0.62
  -2  -6 -16    0.04    0.65
  -2   6 -17    2.57    0.77
   2  -6  17    2.52    1.00
   2  -6  17    2.85    0.91
   2   6  17    1.43    0.74
  -2  -6 -17    2.67    1.02
  -2   6 -18    4.94    1.35
   2  -6  18    4.59    1.09
   2   6  18    4.50    1.30
   2  -6  18    4.12    1.16
  -2  -6 -18    5.14    1.44
  -2   6 -19    6.81    1.51
   2  -6  19   11.51    2.02
   2  -6  19    8.81    1.85
   2   6  19   12.40    2.09
  -2  -6 -19   10.13    1.94
  -2   6 -20  145.65    7.53
   2  -6  20  150.54    7.71
   2   6  20  148.55    7.49
   2  -6  20  146.90    7.37
  -2  -6 -20  151.47    7.56
  -2   6 -21   46.22    4.42
   2   6  21   45.56    4.29
   2  -6  21   45.11    4.24
   2  -6  21   41.48    4.15
  -2  -6 -21   43.59    4.22
  -2   6 -22  102.83    6.67
   2   6  22  105.03    6.58
   2  -6  22  105.70    6.74
   2  -6  22   98.06    6.40
  -2  -6 -22   99.15    6.49
  -2   6 -23   86.43    6.23
   2  -6  23   88.70    6.18
   2  -6  23   88.39    6.33
   2   6  23   95.55    6.49
  -2  -6 -23   86.78    6.18
  -2   6 -24  303.90   11.96
   2  -6  24  299.92   11.75
   2  -6  24  328.17   12.39
   2   6  24  315.68   12.03
  -2  -6 -24  316.21   12.12
  -2   6 -25   27.04    3.71
   2  -6  25   25.02    3.55
   2  -6  25   24.01    3.41
   2   6  25   28.15    3.64
  -2   6 -25   25.90    3.57
  -2  -6 -25   29.03    3.87
  -2   8  26    4.70    1.65
   2  -8 -26    3.82    1.06
   2   8 -25   15.50    2.81
  -2   8  25   14.02    2.57
  -2  -8  25   18.16    2.85
  -2  -8  25   18.16    3.03
   2  -8 -25   16.66    2.80
   2   8 -24    7.09    2.01
  -2  -8  24    4.24    1.43
  -2   8  24    5.42    1.41
  -2  -8  24    3.45    1.20
   2  -8 -24    4.63    1.48
   2   8 -23    1.55    1.18
  -2   8  23    1.11    0.83
  -2  -8  23   -1.71    1.30
  -2  -8  23    1.23    0.56
   2  -8 -23    0.37    0.84
   2   8 -22    0.76    0.95
  -2  -8  22   -1.58    1.23
  -2   8  22   -0.28    0.58
   2  -8 -22    0.09    0.77
   2   8 -21   42.70    4.29
  -2   8  21   37.67    3.80
  -2  -8  21   41.31    4.15
   2  -8 -21   42.08    4.05
   2   8 -20   45.07    4.26
  -2  -8  20   41.80    4.12
  -2   8  20   41.98    3.94
   2  -8 -20   38.74    3.76
   2   8 -19    5.37    1.41
  -2   8  19    5.65    1.23
  -2   8  19    5.24    1.43
  -2  -8  19    6.10    1.50
   2  -8 -19    6.49    1.55
   2   8 -18  136.98    7.09
  -2   8  18  136.50    5.68
  -2   8  18  129.38    5.96
  -2   8  18  133.19    6.51
  -2   8  18  134.39    6.70
  -2  -8  18  136.75    7.14
   2  -8 -18  132.38    6.67
   2   8 -17    0.74    0.53
  -2  -8  17    1.09    0.32
  -2   8  17    1.30    0.65
  -2   8  17    1.07    0.53
  -2   8  17    0.00    0.79
  -2   8  17   -0.07    0.58
  -2  -8  17    0.84    0.84
   2  -8 -17    2.99    1.18
   2   8 -16  757.91   15.92
  -2   8  16  755.64   12.40
  -2  -8  16  779.53    8.02
  -2   8  16  753.74   14.27
  -2   8  16  763.27   14.92
  -2  -8  16  741.37   16.08
  -2   8  16  741.41   14.97
   2  -8 -16  737.91   14.99
  -2   8  15    1.28    0.53
   2   8 -15    0.35    0.46
  -2   8  15    0.18    0.48
  -2   8  15    0.39    0.56
  -2   8  15    0.79    0.53
  -2   8  15    0.33    0.72
  -2  -8  15    0.86    0.72
   2  -8 -15    2.87    1.25
   2   8 -14  308.73    9.69
  -2   8  14  327.38    7.60
  -2   8  14  327.49    9.32
  -2   8  14  319.96    9.11
  -2   8  14  331.18    7.64
  -2   8  14  320.87    9.38
  -2  -8  14  320.91   10.22
   2  -8 -14  329.83    9.55
  -2   8  13    2.94    0.65
   2   8 -13    4.40    1.20
  -2   8  13    3.76    0.88
  -2   8  13    2.71    0.84
  -2   8  13    3.04    0.74
  -2   8  13    3.89    1.00
  -2   8  13    2.55    0.81
  -2  -8  13    2.73    1.00
   2  -8 -13    2.80    1.00
  -2   8  12  253.91    6.25
   2   8 -12  248.44    8.32
  -2   8  12  252.84    8.02
  -2   8  12  247.44    7.76
  -2   8  12  247.55    6.65
  -2   8  12  258.59    6.28
  -2  -8  12  239.63    8.55
  -2   8  12  251.03    7.95
   2  -8 -12  246.02    7.95
   2   8 -11    0.14    0.42
  -2   8  11    0.42    0.48
  -2   8  11   -0.14    0.56
  -2   8  11    0.72    0.39
  -2   8  11    0.60    0.35
   2  -8 -11   -0.02    0.40
  -2  -8  11   -0.86    0.72
  -2   8  11    0.51    0.33
   2  -8 -11    0.79    0.56
   2   8 -10   26.20    2.59
  -2  -8  10   26.48    2.62
  -2   8  10   27.76    1.94
  -2   8  10   23.40    2.09
  -2   8  10   26.28    2.57
  -2   8  10   24.45    2.36
   2  -8 -10   24.63    2.38
  -2  -8  10   22.69    2.60
  -2   8  10   25.76    2.48
   2  -8 -10   24.35    2.41
  -2  -8   9  154.46    6.18
   2   8  -9  138.61    5.75
  -2   8   9  152.81    4.43
  -2   8   9  146.67    5.66
  -2   8   9  147.50    5.37
  -2   8   9  145.58    5.98
  -2  -8   9  141.11    6.33
   2  -8  -9  155.45    5.82
  -2   8   9  150.45    5.86
   2  -8  -9  151.09    5.86
   2   8  -8  248.06    7.55
  -2  -8   8  264.29    7.86
  -2   8   8  262.11    5.72
  -2   8   8  242.83    7.18
  -2   8   8  241.09    6.95
  -2   8   8  248.04    7.81
  -2  -8   8  247.35    8.30
   2  -8  -8  243.36    7.20
   2  -8  -8  235.67    7.27
  -2   8   8  252.77    7.44
  -2  -8   7   13.35    1.74
  -2   8   7   10.40    1.11
   2   8  -7   10.13    1.50
  -2   8   7   10.15    1.44
  -2   8   7   10.68    1.65
  -2  -8   7   10.15    1.71
   2  -8  -7   10.84    1.48
   2   8  -7   12.33    1.76
   2  -8  -7   11.77    1.60
  -2   8   7   10.94    1.51
  -2  -8   6  179.09    6.16
   2   8  -6  169.38    5.98
  -2   8   6  175.47    4.52
  -2   8   6  169.31    5.95
  -2   8   6  192.60    6.81
   2  -8  -6  174.64    5.88
  -2  -8   6  167.17    6.76
   2  -8  -6  170.42    6.00
  -2   8   6  174.33    6.02
   2   8  -6  184.30    6.76
   2   8  -5    1.48    0.51
  -2   8   5    0.65    0.21
  -2  -8   5    0.63    0.30
  -2   8   5    0.70    0.48
  -2   8   5    2.16    0.74
   2  -8  -5    1.60    0.62
  -2   8   5    1.67    0.58
  -2  -8   5    1.23    0.67
   2   8  -5    1.55    0.56
   2  -8  -5    1.83    0.65
   2   8  -4   23.47    2.18
  -2  -8   4   23.70    2.13
  -2   8   4   22.03    1.58
  -2   8   4   22.47    2.20
   2  -8  -4   23.20    2.15
  -2   8   4   19.76    2.20
   2  -8  -4   22.01    2.04
   2  -8  -4   22.80    2.15
  -2  -8   4   24.47    2.50
  -2   8   4   22.94    2.15
   2  -8  -4   24.30    2.46
   2   8  -4   24.10    2.39
  -2   8   3   82.95    3.15
   2   8  -3   84.39    4.01
   2  -8  -3   81.88    4.06
  -2  -8   3   84.37    3.96
  -2   8   3   89.67    4.66
  -2   8   3   81.77    4.29
   2  -8  -3   83.93    4.01
   2  -8  -3   84.11    4.13
   2   8  -3   83.88    4.49
  -2   8   3   84.97    4.10
  -2  -8   3   81.52    4.59
  -2  -8   3   80.20    4.36
   2  -8  -3   81.61    4.54
   2   8  -2  240.37    6.67
  -2   8   2  236.62    5.38
  -2  -8   2  216.57    5.93
  -2   8   2  237.45    7.39
  -2   8   2  242.88    7.72
  -2  -8   2  230.23    6.42
   2  -8  -2  227.74    5.12
   2  -8  -2  237.47    6.93
   2  -8  -2  227.84    6.54
   2   8  -2  239.31    7.46
  -2  -8   2  223.94    7.27
  -2  -8   2  224.29    7.64
   2  -8  -2  233.51    7.65
   2  -8  -2  225.70    6.74
  -2   8   2  229.36    6.72
   2   8  -1    2.01    0.63
  -2   8   1    2.32    0.53
  -2   8   1    1.94    0.62
   2  -8  -1    1.78    0.72
  -2  -8   1    1.81    0.48
  -2   8   1    2.27    0.67
  -2  -8   1    2.25    0.62
   2  -8  -1    1.90    0.49
   2  -8  -1    1.48    0.51
  -2  -8   1    1.58    0.62
  -2  -8   1    1.74    0.56
   2   8  -1    1.48    0.56
   2  -8  -1    2.08    0.77
  -2   8   1    2.20    0.62
   2  -8  -1    1.43    0.37
  -2   8   0  297.40    6.33
   2   8   0  320.56    7.58
   2   8   0  310.69    8.60
  -2   8   0  307.11    8.60
   2  -8   0  300.11    7.83
  -2   8   0  325.50    8.97
   2  -8   0  307.73    6.33
  -2  -8   0  291.86    6.76
  -2  -8   0  297.05    7.09
  -2  -8   0  305.90    8.27
  -2   8   0  295.66    7.71
  -2  -8   0  302.95    8.41
   2  -8   0  301.71    7.79
  -2  -8   0  308.24    9.01
   2   8   0  298.97    8.34
   2  -8   0  307.98    8.80
  -2   8  -1    8.16    1.11
   2   8   1    9.85    1.35
  -2  -8  -1    7.28    1.14
  -2  -8  -1    6.93    1.00
   2  -8   1    6.70    1.14
   2  -8   1    7.37    1.06
   2   8   1    9.18    1.46
  -2   8  -1    8.73    1.48
  -2   8  -1    6.54    1.25
  -2  -8  -1    6.97    1.25
   2  -8   1    7.72    1.41
  -2  -8  -1    5.63    1.28
  -2  -8  -1    8.15    1.39
   2   8   1    7.34    1.34
  -2   8  -1    6.72    1.14
   2  -8   2   42.57    2.53
   2   8   2   42.35    2.74
  -2   8  -2   41.15    2.50
   2   8   2   43.45    3.17
  -2   8  -2   44.63    3.36
  -2   8  -2   45.16    3.34
   2   8   2   42.49    3.03
  -2  -8  -2   43.91    3.17
   2  -8   2   45.27    3.41
  -2   8  -2   45.28    3.04
  -2  -8  -2   40.45    3.08
   2   8   2   45.48    3.25
  -2   8  -3   18.61    1.76
   2   8   3   20.27    1.86
   2  -8   3   19.42    1.76
   2   8   3   16.47    1.81
  -2   8  -3   18.17    2.11
   2   8   3   20.57    2.18
  -2  -8  -3   19.33    2.11
   2  -8   3   18.53    2.23
   2   8   3   22.06    2.29
  -2   8  -3   16.04    1.90
  -2  -8  -3   18.49    2.11
   2  -8   4  294.31    7.18
  -2   8  -4  285.69    7.04
   2   8   4  299.62    7.25
   2   8   4  284.30    7.65
   2   8   4  293.62    8.23
  -2   8  -4  294.15    8.71
  -2  -8  -4  297.65    8.41
   2  -8   4  280.57    8.62
  -2  -8  -4  290.65    8.41
   2   8   4  296.19    8.44
  -2   8  -4  289.65    7.99
   2  -8   5    6.70    1.14
  -2   8  -5    6.53    1.09
   2   8   5    6.56    1.25
   2   8   5    7.41    1.25
   2   8   5    5.82    1.00
   2  -8   5    5.00    1.20
  -2  -8  -5    5.42    1.09
   2   8   5    6.14    1.25
  -2  -8  -5    6.18    1.16
  -2   8  -5    6.16    1.16
  -2   8  -6  314.45    7.81
   2  -8   6  316.81    7.97
   2   8   6  328.79    7.67
   2   8   6  319.38    8.48
   2   8   6  304.07    7.71
  -2  -8  -6  328.91    8.94
   2  -8   6  302.31    9.17
  -2   8  -6  325.23    8.71
   2   8   6  323.48    8.99
  -2  -8  -6  317.21    8.95
  -2   8  -7   95.49    4.43
   2  -8   7   94.26    4.52
   2   8   7   95.04    4.19
   2   8   7   94.33    4.63
   2   8   7   89.42    4.12
   2   8   7   89.56    3.91
   2  -8   7   89.79    5.05
  -2  -8  -7   92.01    4.89
  -2   8  -7   90.27    4.68
  -2   8  -8 1031.28   15.06
   2  -8   8 1035.91   15.27
   2   8   8 1008.66   13.51
   2   8   8 1051.39   13.70
   2   8   8 1048.82   15.45
   2   8   8 1075.74   14.29
   2  -8   8  977.92   16.82
  -2   8  -8 1056.84   16.29
  -2  -8  -8 1022.03   16.48
  -2   8  -9   23.73    2.36
   2  -8   9   24.91    2.52
   2   8   9   26.25    2.30
   2   8   9   25.49    2.22
   2   8   9   26.99    2.48
   2   8   9   25.58    2.13
   2  -8   9   27.97    2.89
  -2  -8  -9   28.29    2.80
  -2   8 -10  431.71   10.34
   2  -8  10  466.06   10.91
   2   8  10  439.22    9.39
   2   8  10  449.07    9.62
   2   8  10  454.70   10.15
   2   8  10  428.47    8.39
   2  -8  10  426.06   11.45
  -2  -8 -10  451.64   11.33
   2  -8  10  432.59    7.11
  -2   8 -11    2.83    0.93
   2   8  11    4.03    1.00
   2   8  11    4.40    0.86
   2   8  11    3.62    0.97
   2   8  11    4.43    1.02
   2   8  11    3.91    1.20
   2  -8  11    5.15    1.32
  -2  -8 -11    6.25    1.35
   2  -8  11    3.68    0.62
  -2   8 -12  187.89    7.21
   2   8  12  181.47    6.33
   2   8  12  188.87    6.63
   2   8  12  183.93    6.44
   2   8  12  184.28    5.26
   2  -8  12  182.73    7.76
   2   8  12  181.13    7.41
  -2  -8 -12  184.46    7.51
   2  -8  12  188.19    3.92
  -2   8 -13   54.20    3.98
   2  -8  13   56.16    1.74
   2   8  13   53.87    3.57
   2   8  13   54.50    2.74
   2   8  13   59.02    3.75
   2   8  13   54.08    3.55
   2  -8  13   55.31    4.36
   2   8  13   50.14    3.98
  -2  -8 -13   61.49    4.43
   2   8  14   -0.05    0.51
  -2   8 -14   -0.02    0.55
   2   8  14    0.35    0.49
   2   8  14   -0.25    0.44
   2   8  14    0.11    0.32
   2   8  14    0.28    0.46
   2   8  14   -0.28    0.60
   2  -8  14    0.46    0.58
  -2  -8 -14   -0.12    0.46
  -2   8 -15    0.16    0.48
   2   8  15    1.00    0.37
   2   8  15    1.34    0.60
   2   8  15    0.77    0.46
   2  -8  15    0.49    0.49
  -2  -8 -15    1.67    0.84
  -2   8 -16    0.49    0.56
   2   8  16   -0.16    0.55
   2   8  16    0.84    0.46
   2  -8  16   -0.40    0.77
  -2  -8 -16    0.05    0.72
  -2   8 -17   28.24    3.24
   2   8  17   29.56    2.60
   2   8  17   30.42    3.34
   2  -8  17   33.34    3.62
  -2  -8 -17   29.71    3.34
  -2   8 -18   -0.09    0.58
   2   8  18    0.09    0.55
   2  -8  18   -0.42    0.93
   2  -8  18    0.88    0.81
  -2  -8 -18   -1.02    1.07
  -2   8 -19    7.48    1.81
   2   8  19   12.00    2.22
   2  -8  19   10.38    2.08
   2  -8  19    8.67    1.81
  -2  -8 -19   10.22    2.08
  -2   8 -20   52.71    4.77
   2  -8  20   48.36    4.50
   2   8  20   51.99    4.70
   2  -8  20   51.32    4.82
  -2  -8 -20   51.60    4.75
  -2   8 -21   19.28    2.96
   2  -8  21   22.50    3.17
   2  -8  21   21.85    3.22
   2   8  21   23.45    3.24
  -2  -8 -21   27.11    3.48
  -2   8 -22    7.55    1.90
   2   8  22    7.27    1.86
   2  -8  22    9.43    2.08
   2  -8  22    7.42    1.95
  -2  -8 -22    6.67    1.83
  -2   8 -23   14.37    2.57
   2   8  23   18.40    3.03
   2  -8  23   15.43    2.73
  -2  -8 -23   17.72    3.03
   2  -8  24  366.72   13.42
  -2  10  25    6.09    1.92
  -2  10  24    1.07    0.90
  -2  10  23    0.55    0.69
  -2  10  23   -1.34    0.99
   2 -10 -23    0.83    0.97
   2  10 -22    2.01    1.09
  -2  10  22    2.57    1.14
  -2  10  22    0.58    0.90
   2 -10 -22    2.60    1.20
   2  10 -21    0.37    0.55
  -2  10  21    1.25    0.63
  -2  10  21    2.08    1.48
  -2 -10  21    0.07    0.81
   2 -10 -21    0.86    0.77
   2  10 -20  131.52    7.76
  -2  10  20  139.16    7.30
  -2  10  20  133.58    7.48
  -2 -10  20  138.56    8.13
   2 -10 -20  134.94    7.60
   2  10 -19    0.18    0.67
  -2  10  19    1.20    1.02
  -2  10  19   -0.04    0.53
  -2  10  19    2.16    1.14
  -2 -10  19   -0.07    0.76
   2 -10 -19    0.69    0.99
   2  10 -18  201.00    9.15
  -2  10  18  194.10    8.32
  -2  10  18  194.94    8.22
  -2 -10  18  196.84    9.43
   2 -10 -18  201.40    8.88
   2  10 -17   17.05    2.71
  -2  10  17   17.72    2.48
  -2  10  17   21.53    2.18
  -2  10  17   16.36    2.41
  -2 -10  17   20.83    3.06
   2 -10 -17   17.45    2.53
   2  10 -16  168.34    8.02
  -2  10  16  180.17    6.16
  -2  10  16  161.36    7.30
  -2  10  16  174.87    7.74
  -2 -10  16  178.71    8.69
   2 -10 -16  174.08    7.93
   2  10 -15    1.04    0.81
  -2  10  15    1.34    0.99
  -2  10  15    0.37    0.37
  -2  10  15    0.46    0.55
  -2 -10  15    0.05    0.55
   2 -10 -15    0.28    0.53
   2  10 -14  270.15    9.75
  -2  10  14  308.42    7.62
  -2  10  14  291.65    9.43
  -2  10  14  284.19    9.73
  -2 -10  14  276.40   10.57
   2 -10 -14  270.66    9.57
   2  10 -13   22.62    2.71
  -2  10  13   27.55    2.25
  -2  10  13   27.16    2.87
  -2  10  13   26.46    3.01
  -2 -10  13   26.04    3.22
   2 -10 -13   23.20    2.78
  -2  10  12  176.24    5.51
   2  10 -12  163.84    7.27
  -2  10  12  158.54    6.74
  -2  10  12  159.51    7.20
  -2  10  12  157.07    6.19
  -2 -10  12  164.51    7.90
   2 -10 -12  162.59    7.14
  -2  10  11   14.71    1.57
   2  10 -11   15.69    2.25
  -2  10  11   15.53    2.30
  -2 -10  11   11.40    2.08
   2 -10 -11   13.12    2.02
   2  10 -10  184.53    7.49
  -2  10  10  199.43    5.61
  -2  10  10  186.94    7.72
  -2 -10  10  183.17    8.23
   2 -10 -10  183.77    7.39
  -2  10   9    3.13    0.70
   2  10  -9    1.67    0.74
  -2  10   9    2.18    1.02
  -2 -10   9    2.36    0.76
   2 -10  -9    5.03    1.28
  -2  10   8   66.39    3.18
   2  10  -8   60.41    4.08
  -2  10   8   58.74    4.36
  -2 -10   8   59.66    4.63
   2 -10  -8   58.55    4.06
  -2  10   7  139.49    4.57
   2  10  -7  133.93    6.02
  -2  10   7  133.48    6.53
  -2 -10   7  129.82    6.76
   2 -10  -7  126.10    6.53
   2 -10  -7  123.71    5.88
  -2 -10   6   54.64    3.75
   2  10  -6   54.22    3.73
  -2  10   6   56.51    2.89
  -2  10   6   55.63    4.17
  -2 -10   6   51.51    4.24
   2 -10  -6   48.59    3.64
   2 -10  -6   53.01    4.19
   2  10  -5  103.32    5.07
  -2  10   5  106.93    3.99
  -2  10   5  105.71    5.84
  -2 -10   5  106.79    5.14
  -2 -10   5  101.91    4.84
  -2 -10   5  101.30    5.89
   2 -10  -5  101.03    5.81
   2 -10  -5   99.47    5.17
   2  10  -4  188.28    6.74
  -2  10   4  190.46    5.33
  -2 -10   4  191.51    6.70
  -2 -10   4  177.28    6.33
  -2  10   4  188.03    7.72
  -2 -10   4  189.33    8.02
   2 -10  -4  175.45    6.84
   2 -10  -4  182.42    7.74
   2  10  -3  179.76    6.49
  -2  10   3  186.76    5.35
  -2 -10   3  172.90    6.18
   2  10  -3  182.26    7.62
  -2  10   3  182.93    7.65
   2 -10  -3  181.29    6.77
  -2 -10   3  174.01    6.28
   2 -10  -3  184.51    6.77
  -2 -10   3  176.88    7.76
   2 -10  -3  178.86    6.90
   2 -10  -3  180.01    7.69
   2  10  -2    3.25    0.65
  -2  10   2    7.28    1.06
   2  10  -2    3.68    0.91
  -2 -10   2    4.86    1.02
  -2 -10   2    5.49    1.16
   2 -10  -2    5.01    1.13
  -2  10   2    4.26    0.86
   2 -10  -2    4.45    1.00
  -2 -10   2    3.04    0.93
   2 -10  -2    6.86    1.35
   2 -10  -2    4.89    1.25
  -2 -10   2    4.31    1.21
  -2  10   1    7.21    1.07
   2  10  -1    8.32    1.37
  -2  10   1    9.76    1.86
   2 -10  -1    5.75    1.18
   2  10  -1    5.65    1.37
  -2 -10   1    6.12    1.06
  -2 -10   1    6.95    1.23
   2 -10  -1    7.67    1.07
   2 -10  -1    6.14    1.16
  -2 -10   1    7.16    1.44
   2 -10  -1    7.95    1.58
  -2 -10   1    7.00    1.50
   2  10   0  208.07    6.81
  -2  10   0  212.24    6.00
  -2 -10   0  203.69    6.54
  -2  10   0  217.53    8.36
   2 -10   0  203.09    5.79
   2  10   0  209.55    8.13
  -2 -10   0  189.38    6.28
   2 -10   0  208.33    7.18
   2 -10   0  200.98    8.16
  -2 -10   0  198.99    7.72
  -2 -10   0  199.27    8.23
   2 -10   1   -0.76    0.65
  -2  10  -1   -0.35    0.88
   2  10   1    1.34    0.79
   2  10   1    2.18    0.77
  -2  10  -1    0.00    0.51
  -2 -10  -1   -0.25    0.49
  -2 -10  -1   -0.33    0.84
   2 -10   1    1.46    0.49
   2  10   2  501.85   10.41
  -2  10  -2  488.46    9.62
  -2  10  -2  508.34   12.88
   2  10   2  494.60   12.35
   2 -10   2  477.16    9.38
   2 -10   2  469.85   12.54
  -2 -10  -2  472.12   11.98
  -2 -10  -2  473.03   12.77
   2 -10   3   14.97    1.76
  -2  10  -3   14.95    1.76
   2  10   3   15.66    1.85
   2  10   3   15.41    2.20
  -2  10  -3   13.93    2.20
   2 -10   3   11.21    2.02
  -2 -10  -3   11.56    1.79
  -2 -10  -3   13.04    2.15
   2 -10   4  467.74    9.87
  -2  10  -4  460.58    9.82
   2  10   4  482.02   10.19
  -2  10  -4  490.64   12.83
   2  10   4  475.32   12.03
   2 -10   4  451.44   12.47
  -2 -10  -4  460.08   11.93
   2  10   5  162.70    5.95
  -2  10  -5  156.03    5.88
   2 -10   5  162.34    6.03
   2  10   5  158.97    6.95
  -2  10  -5  158.39    7.37
   2 -10   5  160.44    7.42
  -2 -10  -5  152.77    6.93
  -2  10  -6  574.14   11.59
   2  10   6  604.62   11.51
   2 -10   6  590.06   11.77
   2  10   6  593.26   13.39
  -2  10  -6  572.15   14.13
   2 -10   6  566.47   14.11
  -2 -10  -6  575.47   13.55
  -2  10  -7   14.44    1.88
   2 -10   7   15.13    2.01
   2  10   7   18.24    1.99
   2  10   7   14.53    2.11
  -2  10  -7   13.55    2.27
   2 -10   7   14.48    2.34
  -2 -10  -7   15.94    2.27
  -2  10  -8  239.96    7.90
   2  10   8  251.91    7.55
  -2  10  -8  237.76    9.20
   2  10   8  244.34    8.53
   2 -10   8  234.28    9.29
  -2 -10  -8  235.69    8.85
  -2  10  -9    0.12    0.65
   2  10   9    1.06    0.69
   2  10   9    1.23    0.72
   2  10   9   -0.48    0.63
   2 -10   9   -0.60    0.63
  -2 -10  -9   -1.04    1.04
   2 -10   9   -0.39    0.44
  -2  10 -10  476.25   11.70
   2  10  10  504.79   11.00
   2  10  10  490.48   12.10
   2  10  10  462.48   10.36
   2 -10  10  461.67   13.34
  -2 -10 -10  474.63   12.86
  -2  10 -11   48.59    3.84
   2  10  11   43.91    3.25
   2  10  11   41.54    3.06
   2  10  11   48.61    3.87
   2  10  11   48.20    3.48
   2 -10  11   45.07    4.28
  -2 -10 -11   46.25    4.06
  -2  10 -12   53.75    4.13
   2  10  12   58.79    3.82
   2  10  12   60.22    4.29
   2  10  12   60.22    3.91
   2 -10  12   55.28    4.71
  -2 -10 -12   58.09    4.66
  -2  10 -13    4.86    1.28
   2  10  13    4.24    1.14
   2  10  13    5.08    1.34
   2  10  13    3.62    0.99
   2 -10  13    4.79    1.28
  -2 -10 -13    4.57    1.28
  -2  10 -14   15.69    2.41
   2  10  14   14.13    2.16
   2  10  14   16.68    2.11
   2  10  14   16.66    2.18
   2 -10  14   17.72    2.76
  -2 -10 -14   17.01    2.60
  -2  10 -15   -0.37    0.58
   2  10  15   -0.49    0.51
   2  10  15   -0.58    0.76
   2  10  15    0.65    0.65
   2 -10  15    0.05    0.69
  -2 -10 -15    0.26    0.67
  -2  10 -16    0.42    0.53
   2  10  16    0.97    0.77
   2  10  16    0.48    0.42
   2  10  16    0.76    0.48
   2 -10  16    2.89    1.32
  -2 -10 -16    1.50    1.13
  -2  10 -17   28.11    3.43
   2  10  17   29.45    3.13
   2  10  17   32.69    3.20
   2  10  17   32.72    3.25
   2 -10  17   31.60    3.84
  -2 -10 -17   30.12    3.62
  -2  10 -18   81.51    5.93
   2  10  18   85.98    5.33
   2  10  18   87.49    5.30
   2  10  18   81.89    5.01
   2 -10  18   93.70    6.77
  -2 -10 -18   86.50    6.30
  -2  10 -19   20.90    3.13
   2  10  19   25.37    2.90
   2  10  19   24.08    2.89
   2  10  19   24.66    3.40
   2 -10  19   28.68    3.78
  -2 -10 -19   22.96    3.31
  -2  10 -20  100.79    6.84
   2  10  20  107.54    6.21
   2  10  20  105.75    7.13
   2 -10  20  102.51    6.86
  -2 -10 -20  112.86    7.37
  -2  10 -21   29.22    3.78
   2 -10  21   29.59    3.84
  -2  12  20   29.33    3.61
   2 -12 -20   29.06    3.80
  -2  12  19   25.53    3.24
  -2  12  19   24.31    3.22
   2  12 -19   24.47    3.52
   2 -12 -19   22.66    3.22
  -2  12  18   88.46    6.18
  -2  12  18   85.96    5.82
   2  12 -18   84.97    6.30
   2 -12 -18   88.51    6.37
  -2  12  17    7.56    1.86
   2  12 -17    6.91    1.78
   2 -12 -17    9.36    2.02
  -2  12  16   39.32    4.12
   2  12 -16   41.57    4.28
   2 -12 -16   40.92    4.19
   2  12 -15   -0.26    0.90
  -2  12  15    0.53    0.77
  -2 -12  15   -0.12    0.99
   2 -12 -15    0.74    0.88
   2  12 -14  139.33    7.53
  -2  12  14  145.33    7.72
  -2 -12  14  147.41    8.53
   2 -12 -14  138.59    7.55
   2  12 -13    8.83    1.94
  -2  12  13    9.08    1.92
  -2 -12  13    7.23    1.83
   2 -12 -13    8.34    1.88
   2  12 -12  117.24    6.67
  -2  12  12  119.30    6.98
  -2 -12  12  127.16    7.69
   2 -12 -12  118.43    6.81
   2  12 -11    0.60    0.72
  -2  12  11    1.39    1.02
  -2 -12  11    2.23    1.30
   2 -12 -11    0.69    1.06
   2  12 -10  358.06   11.17
  -2  12  10  388.52   12.58
  -2 -12  10  353.30   12.70
   2 -12 -10  343.34   12.35
   2 -12 -10  333.68   11.17
   2  12  -9   -0.40    0.51
  -2  12   9    1.28    1.21
  -2 -12   9    1.32    0.62
   2 -12  -9    1.02    0.55
   2 -12  -9    0.44    0.83
   2  12  -8   95.67    5.59
  -2  12   8   90.88    6.09
  -2 -12   8   96.99    6.56
   2 -12  -8   92.77    6.30
   2 -12  -8   93.28    5.79
   2  12  -7    2.50    0.99
  -2  12   7    4.40    1.37
   2  12  -7    5.42    1.50
  -2 -12   7    3.68    1.20
   2 -12  -7    4.13    1.13
   2 -12  -7    4.79    1.44
   2  12  -6   10.33    1.79
   2  12  -6   13.97    2.48
  -2  12   6   12.81    2.29
  -2 -12   6   12.98    2.36
   2 -12  -6   10.85    2.18
   2 -12  -6    9.08    1.85
   2  12  -5    0.32    0.49
  -2  12   5    0.95    0.95
   2  12  -5    0.25    0.65
  -2 -12   5   -0.18    0.69
   2 -12  -5   -0.07    0.62
   2 -12  -5    0.28    0.58
  -2  12   4   15.55    2.55
   2  12  -4   13.28    2.34
   2  12  -4   13.85    2.01
   2 -12  -4   12.21    2.06
   2 -12  -4   11.35    2.16
  -2 -12   4   12.56    2.36
  -2  12   3   10.71    2.08
   2  12  -3   13.76    2.45
   2  12  -3   13.09    1.90
  -2  12   3   11.66    1.43
  -2 -12   3   12.58    2.32
   2 -12  -3   12.65    2.25
   2 -12  -3   14.46    2.23
   2  12  -2   41.03    4.12
  -2  12   2   35.61    3.80
  -2  12   2   37.91    2.67
   2  12  -2   36.50    3.15
   2 -12  -2   32.42    3.66
  -2 -12   2   34.27    3.85
  -2  12   1   27.92    3.40
   2  12  -1   25.47    3.24
   2  12  -1   25.32    2.60
  -2  12   1   28.80    2.36
   2 -12  -1   26.51    3.34
  -2 -12   1   29.45    3.59
  -2  12   0   74.10    3.89
   2  12   0   69.88    4.29
   2  12   0   72.82    5.35
  -2  12   0   75.91    5.61
   2 -12   0   74.50    5.54
  -2 -12   0   63.37    4.91
  -2 -12   0   70.44    5.56
  -2  12  -1    3.03    1.41
   2  12   1    2.69    1.13
   2  12   1    2.36    0.58
  -2  12  -1    3.40    0.99
  -2 -12  -1    2.74    1.16
  -2 -12  -1    1.37    0.79
   2 -12   1    3.24    1.35
   2  12   2  156.68    6.40
  -2  12  -2  152.63    5.86
  -2  12  -2  168.33    8.37
   2  12   2  147.27    7.60
   2 -12   2  144.44    7.86
  -2 -12  -2  150.93    8.09
  -2 -12  -2  141.43    7.37
   2  12   3   20.02    2.27
  -2  12  -3   19.25    2.11
   2  12   3   17.89    2.73
  -2  12  -3   17.59    2.74
   2 -12   3   18.03    2.69
  -2 -12  -3   16.36    2.48
  -2 -12  -3   17.22    2.73
  -2  12  -4  179.01    6.60
   2  12   4  183.39    6.88
  -2  12  -4  190.19    9.03
   2  12   4  176.47    8.29
   2 -12   4  169.61    8.59
  -2 -12  -4  178.64    8.29
  -2 -12  -4  173.71    8.71
  -2  12  -5    3.78    0.86
   2  12   5    3.64    0.97
   2  12   5    3.54    1.23
  -2  12  -5    4.03    1.34
   2 -12   5    4.52    1.53
  -2 -12  -5    5.26    1.58
  -2 -12  -5    4.10    1.25
   2  12   6  371.12    9.80
  -2  12  -6  346.14    9.73
  -2  12  -6  359.45   12.51
   2  12   6  343.44   11.56
   2 -12   6  331.45   12.07
  -2 -12  -6  307.34   11.07
  -2 -12  -6  345.54   12.46
   2  12   7   -1.11    0.65
  -2  12  -7    0.51    0.44
   2  12   7    1.53    0.99
  -2  12  -7    0.65    0.60
   2 -12   7    0.60    0.49
  -2 -12  -7    0.48    0.56
  -2  12  -8   40.69    3.47
   2  12   8   38.09    3.13
  -2  12  -8   38.88    4.15
   2  12   8   37.07    3.80
   2 -12   8   36.36    4.03
  -2 -12  -8   34.34    3.75
  -2  12  -9    2.90    1.06
   2  12   9    3.17    0.97
   2  12   9    4.31    1.37
  -2  12  -9    1.74    0.93
   2 -12   9    2.73    1.27
  -2 -12  -9    1.81    1.02
  -2  12 -10   98.17    5.68
  -2  12 -10  113.24    7.27
   2  12  10   97.89    6.21
   2 -12  10   96.50    6.76
  -2 -12 -10   93.08    6.32
  -2  12 -11    8.88    1.79
  -2  12 -11    4.28    1.50
   2  12  11    8.41    1.85
   2 -12  11    6.05    1.74
  -2 -12 -11    6.07    1.64
  -2  12 -12   35.77    3.68
   2  12  12   31.56    3.47
  -2  12 -12   31.61    3.82
   2 -12  12   30.17    3.87
  -2 -12 -12   34.41    3.92
  -2  12 -13   -0.63    1.00
  -2  12 -13    0.16    0.72
   2  12  13    0.25    0.74
   2 -12  13   -1.07    1.04
  -2 -12 -13    1.50    0.72
  -2  12 -14   11.40    2.34
   2  12  14    9.61    1.99
  -2  12 -14    9.10    1.94
  -2 -12 -14   10.06    2.23
   2  12  15   11.01    2.02
  -2  12 -15   13.28    2.69
  -2  12 -15   14.80    2.46
  -2 -12 -15   15.06    2.78
   2  12  16    3.22    1.18
  -2  12 -16    3.29    1.37
  -2 -12 -16    2.23    1.27
  -2  12 -17    6.67    1.76
  -2  12 -18   16.50    2.89
   2 -14 -14   80.01    6.37
   2 -14 -13   -0.67    0.65
   2 -14 -12   50.17    4.86
   2 -14 -11    2.02    0.70
   2 -14 -10   23.19    3.18
   2 -14  -9    9.04    2.08
   2 -14  -8   44.86    4.50
   2 -14  -7    4.50    1.46
   2 -14  -6   15.62    2.59
   2 -14  -4    8.80    2.01
   2 -14  -3   32.21    4.08
   2 -14  -2   19.12    3.10
   2 -14  -1   16.31    2.90
   2  14   0   71.62    5.91
   2 -14   0   70.26    6.03
   2  14   1   -0.23    0.60
   2  14   2   30.84    3.78
  -2 -14  -2   27.90    3.59
   2  14   3    4.06    1.35
  -2 -14  -3   -1.50    1.23
   2  14   4  136.82    8.16
  -2 -14  -4  124.57    7.67
   2  14   5    0.46    0.62
  -2 -14  -5    1.74    0.83
   2  14   6  146.35    8.37
  -2 -14  -6  140.58    8.25
   2  14   7   11.47    2.45
  -2 -14  -7    6.74    1.86
   2  14   8  159.00    8.67
  -2 -14  -8  143.19    8.43
   2  14   9    3.40    1.55
  -2 -14  -9   -0.19    0.95
   2  14  10   91.04    6.61
  -3   1  30   -0.32    0.95
  -3  -1  30    0.83    0.81
   3   1 -30    1.09    0.70
   3  -1 -30    0.60    0.56
  -3  -1  29    0.58    0.62
  -3   1  29   -1.13    1.02
   3   1 -29   -0.86    1.00
   3  -1 -29   -0.72    1.00
   3   1 -28   26.42    3.43
  -3   1  28   25.58    3.33
  -3  -1  28   25.98    3.38
   3   1 -28   29.13    3.54
   3  -1 -28   28.89    3.48
   3   1 -27    0.28    0.65
  -3  -1  27    0.49    0.76
  -3   1  27    0.77    0.69
   3   1 -27   -0.35    0.67
   3  -1 -27   -0.49    0.58
   3   1 -26  352.45   11.79
  -3  -1  26  356.78   11.79
  -3   1  26  360.86   11.77
   3   1 -26  350.67   11.63
   3  -1 -26  362.04   11.79
   3   1 -25   87.88    5.79
   3  -1 -25   91.89    4.36
   3  -1 -25   90.80    4.64
  -3   1  25   97.53    6.00
  -3  -1  25   95.53    5.96
   3   1 -25   89.46    5.74
   3  -1 -25   92.61    5.82
   3   1 -24 1294.27   13.28
   3   1 -24 1289.75   21.38
   3  -1 -24 1269.47   15.94
   3  -1 -24 1259.72   16.75
  -3   1  24 1319.62   21.15
  -3  -1  24 1280.76   21.15
   3  -1 -24 1293.11   21.06
   3   1 -24 1299.60   21.16
   3  -1 -23   59.23    3.47
   3   1 -23   55.22    2.74
   3  -1 -23   63.69    4.50
   3   1 -23   53.83    4.26
   3  -1 -23   59.66    3.64
  -3  -1  23   54.13    4.28
  -3   1  23   59.81    4.42
   3  -1 -23   63.44    4.57
   3   1 -23   54.41    4.29
   3   1 -22  239.15    8.66
   3  -1 -22  233.30    8.30
   3  -1 -22  234.53    6.67
   3   1 -22  238.31    5.54
   3  -1 -22  236.69    6.95
  -3  -1  22  239.47    8.59
  -3   1  22  242.27    8.53
   3  -1 -22  236.46    8.50
   3   1 -22  235.62    8.51
   3   1 -21   -0.25    0.62
   3   1 -21   -0.09    0.32
   3  -1 -21    2.53    0.93
   3  -1 -21    1.07    0.97
  -3  -1  21   -0.26    0.72
  -3   1  21    2.41    1.07
   3   1 -21    0.02    0.44
   3  -1 -21    2.55    1.20
   3  -1 -20  983.82   13.14
   3   1 -20  997.85   10.89
   3   1 -20 1015.73   16.85
   3  -1 -20 1009.39   16.08
  -3  -1  20 1022.98   16.75
   3  -1 -20 1055.43   16.13
  -3   1  20 1021.39   16.47
   3   1 -20 1017.05   16.54
   3  -1 -20 1029.61   16.52
   3   1 -19   21.74    2.43
   3  -1 -19   24.38    2.06
   3  -1 -19   25.00    2.53
  -3   1  19   26.93    2.62
   3   1 -19   22.45    1.60
  -3   1  19   24.33    2.52
   3   1 -19   25.65    2.46
   3  -1 -19   24.86    2.43
  -3  -1  19   23.84    2.52
   3  -1 -19   27.50    2.73
   3  -1 -18  712.68   12.61
  -3  -1  18  745.82   13.74
   3   1 -18  721.19   13.28
   3   1 -18  683.53    8.59
   3  -1 -18  730.57   10.75
  -3   1  18  730.60   13.12
  -3   1  18  704.88   12.79
  -3  -1  18  711.85   13.18
   3  -1 -18  754.42   12.63
   3   1 -18  740.54   12.74
   3  -1 -18  727.58   12.97
  -3  -1  17   18.67    2.11
   3  -1 -17   16.29    1.88
   3   1 -17   17.86    2.06
  -3   1  17   20.32    2.13
   3   1 -17   16.29    1.34
  -3   1  17   18.91    2.04
   3   1 -17   17.75    1.88
  -3  -1  17   16.48    1.86
   3  -1 -17   17.12    1.86
   3  -1 -17   18.68    1.99
   3  -1 -17   17.86    1.69
  -3  -1  16  155.68    5.86
   3  -1 -16  151.49    5.42
   3   1 -16  143.82    3.73
  -3   1  16  150.65    5.49
   3   1 -16  147.97    5.63
   3  -1 -16  154.59    5.31
  -3   1  16  150.70    5.47
  -3  -1  16  149.98    5.63
   3   1 -16  157.15    5.45
   3  -1 -16  147.30    5.38
   3  -1 -16  144.21    4.56
   3   1 -15  181.05    6.02
   3  -1 -15  185.37    5.75
  -3  -1  15  189.86    6.25
   3   1 -15  179.08    4.03
  -3   1  15  183.39    5.82
  -3  -1  15  179.96    5.93
  -3   1  15  180.50    5.79
  -3  -1  15  180.98    5.54
   3  -1 -15  187.78    5.56
   3   1 -15  187.52    5.72
   3  -1 -15  180.69    4.93
   3  -1 -15  176.58    5.66
  -3   1  14   26.21    2.11
  -3  -1  14   25.60    2.22
   3  -1 -14   27.48    2.13
   3   1 -14   24.56    1.50
   3   1 -14   24.10    2.09
   3   1 -14   25.70    2.01
  -3  -1  14   23.66    1.94
  -3   1  14   22.75    2.01
  -3  -1  14   23.79    2.11
   3  -1 -14   24.75    1.94
   3  -1 -14   25.25    2.08
   3  -1 -14   25.88    1.81
  -3   1  13  104.06    3.98
   3   1 -13   93.31    4.01
   3   1 -13   98.84    2.83
  -3  -1  13  100.01    4.19
   3  -1 -13  100.47    3.87
   3   1 -13  103.78    3.87
  -3   1  13   99.70    3.92
  -3  -1  13  100.89    3.82
  -3  -1  13  104.13    4.13
   3  -1 -13  104.36    3.82
   3  -1 -13  102.55    3.50
   3  -1 -13  101.74    3.92
  -3  -1  12  333.33    7.27
   3  -1 -12  324.23    6.61
   3   1 -12  316.16    4.84
   3   1 -12  324.74    7.14
  -3   1  12  324.92    6.76
   3   1 -12  328.38    6.56
  -3  -1  12  325.18    6.49
   3  -1 -12  319.61    6.35
  -3  -1  12  325.67    7.00
  -3   1  12  324.25    6.74
  -3  -1  12  324.72    5.03
   3  -1 -12  333.47    6.83
   3  -1 -12  327.42    6.09
  -3  -1  11   95.93    3.73
   3   1 -11   88.00    2.53
   3  -1 -11   97.30    3.41
   3   1 -11   93.38    3.66
  -3   1  11   93.93    3.43
  -3   1  11   93.12    3.40
  -3  -1  11   94.02    3.31
   3  -1 -11   89.21    3.20
   3  -1 -11   97.57    3.52
   3   1 -11   96.85    3.38
   3  -1 -11  100.86    3.52
  -3  -1  11   91.82    2.59
   3  -1 -11   96.92    3.20
   3  -1 -10   63.33    2.60
   3   1 -10   58.69    2.76
  -3  -1  10   61.22    2.87
  -3   1  10   59.85    2.55
   3   1 -10   57.28    1.97
   3  -1 -10   63.46    2.66
  -3   1  10   65.13    2.73
   3   1 -10   62.88    2.57
  -3  -1  10   58.39    2.46
   3  -1 -10   58.64    2.43
   3  -1 -10   63.16    2.62
   3  -1 -10   63.91    2.52
  -3  -1  10   61.77    2.04
   3   1  -9  464.29    5.42
  -3  -1   9  487.05    5.52
  -3   1   9  496.90    6.83
  -3  -1   9  496.87    7.62
   3   1  -9  501.28    7.64
   3  -1  -9  489.85    6.76
   3  -1  -9  489.37    6.93
   3   1  -9  488.90    6.76
  -3   1   9  478.22    6.83
  -3  -1   9  486.37    6.65
   3  -1  -9  498.10    6.91
   3  -1  -9  486.30    6.70
  -3  -1   8   17.28    1.02
   3  -1  -8   19.07    1.25
  -3   1   8   20.30    1.28
   3   1  -8   16.06    0.99
  -3  -1   8   16.10    1.32
   3   1  -8   17.54    1.41
  -3   1   8   17.52    1.23
   3   1  -8   16.24    1.16
  -3  -1   8   16.17    1.14
   3  -1  -8   18.28    1.23
   3  -1  -8   20.58    1.37
   3  -1  -8   20.81    1.35
   3  -1  -7 1384.12    9.50
  -3  -1   7 1358.27    8.60
   3   1  -7 1375.06   11.31
  -3   1   7 1358.10    9.57
  -3  -1   7 1354.65   11.29
  -3   1   7 1378.42    9.89
  -3  -1   7 1362.32    9.64
   3  -1  -7 1342.28    9.96
   3   1  -7 1379.12    9.75
   3  -1  -7 1323.11   10.38
  -3   1   7 1349.16   10.40
   3  -1  -7 1376.75    9.82
  -3  -1   6    1.25    0.39
   3  -1  -6    1.65    0.40
   3   1  -6    1.50    0.42
   3  -1  -6    2.08    0.35
  -3   1   6    3.47    0.48
  -3  -1   6    1.76    0.35
   3  -1  -6    2.09    0.44
   3   1  -6    1.74    0.35
  -3  -1   6    1.62    0.37
   3  -1  -6    2.80    0.51
  -3   1   6    6.49    0.84
   3  -1  -6    3.06    0.53
  -3   1   6    1.37    0.44
   3  -1  -5 1682.91    8.27
   3   1  -5 1652.90   10.98
  -3   1   5 1658.69    8.29
  -3  -1   5 1667.52   11.03
  -3  -1   5 1679.06    9.06
   3  -1  -5 1700.01   10.52
  -3  -1   5 1676.93    8.95
  -3   1   5 1684.09    8.69
   3  -1  -5 1701.14    8.80
   3   1  -5 1660.83    9.11
   3  -1  -5 1691.72   10.61
  -3   1   5 1664.91   10.54
   3  -1  -5 1720.63    8.62
   3  -1  -4 8039.90   22.34
   3   1  -4 8145.58   22.73
  -3  -1   4 8116.82   22.84
   3  -1  -4 8216.20   16.17
  -3  -1   4 8128.27   18.44
   3   1  -4 8166.92   18.53
  -3   1   4 8326.79   22.22
  -3   1   3  458.94    4.94
   3  -1  -3  438.69    4.89
  -3   1   3  467.42    5.07
   3   1  -3  458.90    5.14
   3  -1  -3  458.76    5.01
  -3  -1   3  446.62    5.07
  -3  -1   3  457.83    4.12
   3   1  -3  444.58    4.08
   3   1  -3  449.21    4.84
  -3   1   3  469.62    5.05
  -3   1   2 1243.76    7.65
   3  -1  -2 1194.82    7.79
  -3   1   2 1237.01    7.88
   3  -1  -2 1275.32    7.69
   3   1  -2 1257.47    8.13
  -3   1   2 1237.31    7.71
  -3  -1   2 1206.06    7.95
   3  -1  -2 1225.89    7.67
  -3  -1   2 1238.29    7.60
   3   1  -2 1204.90    7.56
   3  -1  -2 1207.66    5.35
  -3   1   1    4.45    0.46
   3  -1  -1    4.35    0.44
  -3   1   1    4.35    0.44
  -3  -1   1    4.22    0.48
   3  -1  -1    3.78    0.44
   3  -1  -1    4.31    0.46
   3   1  -1    3.85    0.48
  -3   1   1    4.70    0.42
   3  -1  -1    3.64    0.33
   3   1  -1    4.42    0.46
  -3  -1   1    3.61    0.44
  -3   1   0 7159.30   16.31
   3  -1   0 6954.81   16.33
  -3   1   0 7152.07   16.92
   3   1   0 6969.27   19.58
  -3   1   0 6991.84   18.68
   3   1   0 7020.34   18.70
  -3   1   0 6946.38   16.50
   3   1   0 6860.03   18.54
  -3  -1   0 7017.19   18.65
  -3   1  -1 1161.87    6.19
   3  -1   1 1130.75    6.16
   3  -1   1 1137.70    7.21
  -3   1  -1 1149.29    7.64
   3  -1   1 1158.05    7.72
  -3   1  -1 1113.40    6.67
   3  -1   1 1140.21    6.67
  -3   1  -1 1127.48    6.14
  -3   1  -1 1123.94    7.53
  -3  -1  -1 1137.98    8.00
   3  -1   1 1156.33    6.16
   3  -1   1 1176.89    7.65
   3   1   1 1156.24    8.11
  -3  -1  -1 1135.23    8.02
   3   1   1 1122.59    7.99
   3  -1   2 1147.55    8.20
  -3   1  -2 1094.79    5.82
   3  -1   2 1135.64    7.85
  -3   1  -2 1145.65    6.67
  -3   1  -2 1124.43    7.78
   3  -1   2 1166.25    7.32
  -3   1  -2 1130.87    7.21
   3  -1   2 1140.20    8.37
  -3  -1  -2 1151.38    8.64
   3   1   2 1154.09    8.66
  -3   1  -2 1114.55    8.30
  -3  -1  -2 1157.79    8.69
   3   1   2 1154.99    8.64
   3  -1   3  197.04    3.75
  -3   1  -3  190.95    2.34
  -3   1  -3  188.63    3.27
   3  -1   3  182.33    3.24
  -3  -1  -3  192.09    3.80
  -3   1  -3  192.64    3.76
   3  -1   3  196.23    3.41
   3   1   3  192.87    3.82
  -3   1  -3  189.67    3.38
   3  -1   3  190.55    3.73
   3   1   3  188.94    3.80
  -3  -1  -3  194.64    3.84
   3  -1   4   83.72    2.67
  -3   1  -4   83.90    2.71
  -3   1  -4   82.65    2.25
   3  -1   4   82.42    2.22
   3  -1   4   86.19    2.50
   3  -1   4   84.36    2.69
  -3   1  -4   87.26    2.53
  -3   1  -4   84.32    2.69
   3   1   4   85.73    2.74
  -3  -1  -4   81.08    2.62
   3   1   4   86.19    2.71
  -3  -1  -4   85.78    2.73
   3  -1   5  440.31    6.54
  -3   1  -5  435.56    6.51
   3  -1   5  421.48    5.15
  -3   1  -5  410.42    5.10
  -3   1  -5  416.77    6.40
   3  -1   5  425.65    6.05
   3   1   5  418.05    6.44
  -3  -1  -5  428.54    6.46
   3  -1   5  431.71    6.53
  -3   1  -5  417.61    6.03
   3   1   5  435.21    6.53
  -3  -1  -5  427.08    6.51
   3  -1   6   15.94    1.34
  -3   1  -6   16.19    1.35
  -3   1  -6   15.31    1.02
  -3  -1  -6   14.39    0.60
  -3   1  -6   15.31    1.25
   3   1   6   15.02    1.34
   3  -1   6   15.11    1.23
   3  -1   6   16.29    1.39
  -3   1  -6   16.17    1.34
  -3  -1  -6   12.02    1.28
  -3  -1  -6   16.45    1.37
   3   1   6   16.03    1.35
  -3   1  -6   16.75    1.30
   3   1   7  241.09    5.49
   3  -1   7  245.21    5.59
  -3   1  -7  253.79    5.59
  -3  -1  -7  234.07    2.71
  -3   1  -7  239.73    4.06
   3   1   7  246.68    5.52
  -3  -1  -7  247.81    5.54
   3  -1   7  246.58    5.28
   3  -1   7  244.20    5.56
  -3   1  -7  244.82    5.54
  -3   1  -7  238.22    5.24
  -3   1  -7  251.21    5.33
   3   1   7  241.05    5.45
  -3  -1  -7  249.99    5.58
   3  -1   8    0.74    0.48
   3   1   8    0.70    0.39
  -3   1  -8    1.94    0.65
  -3  -1  -8    0.30    0.14
  -3   1  -8    0.93    0.33
  -3  -1  -8    0.91    0.53
   3   1   8    0.48    0.37
   3  -1   8    1.62    0.51
  -3   1  -8    0.81    0.37
   3  -1   8    0.67    0.33
  -3  -1  -8    1.79    0.63
  -3   1  -8    1.16    0.40
   3   1   8    1.34    0.51
   3  -1   9  275.38    6.54
  -3   1  -9  266.65    6.37
   3   1   9  254.51    6.33
  -3   1  -9  260.16    4.42
  -3  -1  -9  253.25    3.40
  -3  -1  -9  270.01    6.37
   3  -1   9  255.23    6.25
   3  -1   9  260.76    6.10
   3   1   9  265.28    6.28
  -3   1  -9  270.22    6.37
  -3  -1  -9  261.60    6.32
  -3   1  -9  262.36    6.12
   3   1   9  264.42    6.28
  -3   1 -10  146.74    4.94
   3   1  10  145.91    4.94
   3  -1  10  150.07    5.10
  -3  -1 -10  144.68    2.76
  -3   1 -10  139.46    3.29
   3   1  10  147.90    4.87
  -3  -1 -10  147.83    4.96
   3  -1  10  141.20    4.86
  -3  -1 -10  147.34    4.94
  -3   1 -10  152.00    5.01
   3  -1  10  145.14    4.79
  -3  -1 -10  149.99    4.91
  -3   1 -10  144.10    4.77
   3   1  10  148.66    4.89
   3   1  11   50.47    3.03
   3  -1  11   45.04    2.89
  -3   1 -11   46.23    2.90
  -3  -1 -11   45.28    1.65
  -3   1 -11   46.23    1.94
  -3   1 -11   49.65    2.96
  -3  -1 -11   49.63    2.99
   3   1  11   46.76    2.81
  -3  -1 -11   48.82    2.97
   3  -1  11   46.37    2.81
  -3   1 -11   44.54    2.78
  -3  -1 -11   49.88    2.97
  -3   1 -12  187.84    6.10
   3  -1  12  198.64    6.35
   3   1  12  199.89    6.30
  -3   1 -12  186.71    3.96
  -3  -1 -12  176.54    3.41
  -3  -1 -12  190.58    6.12
  -3  -1 -12  200.06    6.28
   3  -1  12  186.52    5.91
   3   1  12  189.82    5.95
  -3   1 -12  192.57    6.14
  -3  -1 -12  186.36    6.00
  -3   1 -12  188.47    5.95
   3  -1  13    5.40    1.09
   3   1  13    5.63    1.09
  -3   1 -13    5.38    0.69
  -3  -1 -13    5.37    0.65
   3  -1  13    5.74    1.16
  -3   1 -13    4.43    0.91
  -3  -1 -13    5.33    1.09
   3   1  13    7.49    1.30
  -3  -1 -13    5.86    1.16
  -3  -1 -13    6.46    1.25
  -3   1 -13    4.87    1.04
   3  -1  14  391.45    9.62
   3   1  14  392.28    9.48
  -3   1 -14  370.36    5.75
  -3  -1 -14  364.75    5.42
  -3   1 -14  394.18    9.43
  -3  -1 -14  384.79    9.38
   3   1  14  380.90    9.15
  -3  -1 -14  382.53    9.39
   3  -1  14  366.60    8.92
  -3   1 -14  371.79    9.01
  -3   1 -14  357.15    4.87
  -3  -1 -14  367.09    9.06
   3  -1  15  162.42    6.42
   3   1  15  161.03    6.30
  -3  -1 -15  149.87    3.64
  -3   1 -15  155.94    3.78
  -3  -1 -15  158.95    6.26
  -3   1 -15  164.26    6.32
  -3  -1 -15  167.18    6.37
   3  -1  15  155.59    6.07
   3   1  15  160.22    6.16
  -3   1 -15  151.40    3.27
  -3  -1 -15  161.85    6.19
  -3   1 -15  155.98    6.07
  -3   1 -16 1125.79   10.26
  -3  -1 -16 1096.74   10.20
   3  -1  16 1126.40   16.80
   3   1  16 1159.97   17.06
  -3  -1 -16 1149.85   17.08
  -3   1 -16 1107.00    8.99
  -3   1 -16 1110.96   16.77
  -3   1 -17   24.44    1.57
  -3  -1 -17   19.91    1.43
   3  -1  17   27.11    2.80
   3   1  17   23.56    2.67
  -3   1 -17   21.08    1.32
  -3   1 -17   25.28    2.67
  -3  -1 -17   23.40    2.60
  -3   1 -18  719.50    8.27
  -3  -1 -18  712.47    8.78
   3  -1  18  737.96   14.55
   3   1  18  724.29   14.46
  -3   1 -18  731.10    7.67
  -3   1 -18  722.92   14.43
  -3  -1 -18  724.76   14.57
  -3   1 -19   35.04    1.71
  -3   1 -19   33.23    1.83
  -3  -1 -19   31.28    1.90
   3  -1  19   36.19    3.40
   3   1  19   34.50    3.31
  -3  -1 -19   33.85    3.38
  -3   1 -19   33.14    3.24
  -3  -1 -19   26.53    2.18
  -3   1 -20  662.49    7.41
  -3   1 -20  675.26    7.85
  -3  -1 -20  688.72    9.08
   3  -1  20  656.77   14.60
   3   1  20  667.29   14.73
  -3  -1 -20  667.08   14.81
  -3  -1 -20  641.59   10.40
  -3   1 -20  661.99   14.71
  -3  -1 -21  113.74    3.76
   3   1  21  124.12    6.56
   3  -1  21  113.45    6.25
  -3  -1 -21  111.34    4.40
  -3  -1 -21  117.17    6.40
  -3   1 -21  111.17    6.26
   3   1  22  195.23    8.50
   3  -1  22  196.23    8.50
  -3  -1 -22  205.29    8.69
  -3   1 -22  206.84    8.74
   3   1  23   12.93    2.39
   3  -1  23   11.40    2.20
  -3   1 -23   11.93    2.29
  -3  -1 -23   12.46    2.27
   3   1  24  198.16    8.99
   3  -1  24  201.98    9.17
  -3   1 -24  203.00    9.20
  -3  -1 -24  203.71    9.15
   3  -1  25    1.85    1.13
   3   1  25    1.72    1.02
  -3  -1 -25    4.12    1.46
  -3   1 -25    2.01    1.18
   3   1  26    1.25    1.06
   3  -1  26   -0.55    1.02
  -3   1 -26   -0.14    0.79
  -3  -1 -26    0.09    1.00
   3  -1  27    3.91    1.69
   3   1  27    4.22    1.35
  -3  -1 -27    2.62    1.44
  -3   1 -27    3.96    1.37
  -3   3  30    0.55    0.67
   3  -3 -30    0.56    0.65
   3   3 -29    1.39    0.84
  -3  -3  29   -0.91    1.13
  -3   3  29    0.97    0.77
   3   3 -29    0.23    0.55
   3  -3 -29    0.19    0.51
   3   3 -28   42.29    4.42
  -3  -3  28   40.41    4.28
  -3   3  28   47.01    4.59
   3   3 -28   46.66    4.59
   3  -3 -28   46.76    4.54
   3   3 -27    4.28    1.57
  -3  -3  27    4.28    1.43
  -3   3  27    5.05    1.32
   3  -3 -27    6.84    1.88
   3   3 -27    7.39    1.78
   3   3 -26  244.64   10.15
  -3   3  26  248.81    9.83
  -3  -3  26  236.92    9.85
   3  -3 -26  239.89    9.69
   3   3 -26  244.48    9.96
   3   3 -25    0.49    0.49
  -3  -3  25    1.00    0.79
  -3   3  25    0.81    0.93
   3  -3 -25    0.19    0.84
   3   3 -24  342.60   11.42
   3  -3 -24  331.08    8.71
  -3  -3  24  343.34   11.26
  -3   3  24  338.13   10.87
   3  -3 -24  342.41   10.93
   3   3 -23  210.27    8.69
   3  -3 -23  204.66    6.72
  -3  -3  23  210.53    8.57
  -3   3  23  207.91    8.29
   3  -3 -23  213.36    8.37
   3   3 -22  760.41   16.10
   3  -3 -22  755.76   12.65
  -3  -3  22  755.43   15.15
  -3  -3  22  766.11   15.90
  -3   3  22  789.96   15.53
   3  -3 -22  746.46   13.65
   3  -3 -22  776.26   15.45
   3   3 -21   93.50    5.51
   3  -3 -21   89.02    4.28
  -3  -3  21   90.44    5.33
  -3   3  21   94.40    5.24
  -3  -3  21   89.85    5.12
   3  -3 -21   91.45    5.14
   3  -3 -21   89.49    4.64
   3   3 -20  573.98   13.23
  -3   3  20  603.11   12.37
   3  -3 -20  568.51   10.54
  -3  -3  20  580.61   12.51
  -3  -3  20  587.98   13.16
  -3   3  20  577.00   12.51
   3  -3 -20  573.36   11.49
   3  -3 -20  598.13   12.72
   3   3 -19    0.72    0.63
  -3   3  19    1.00    0.72
   3  -3 -19    1.43    0.67
   3  -3 -19    1.07    0.23
   3  -3 -19    1.39    0.63
  -3  -3  19    1.51    0.60
  -3  -3  19    0.14    0.35
  -3   3  19    2.08    0.83
   3  -3 -19    0.93    0.70
   3  -3 -19    1.90    0.72
   3   3 -18  709.79   13.86
  -3   3  18  720.00   12.67
   3  -3 -18  700.03   11.21
   3  -3 -18  734.79    5.66
   3   3 -18  753.69   13.55
   3  -3 -18  741.97   13.46
  -3   3  18  714.74   13.00
  -3  -3  18  706.70   13.02
  -3  -3  18  716.99   13.69
   3  -3 -18  712.43   12.37
   3  -3 -18  716.02   13.05
  -3   3  17  357.43    8.57
   3   3 -17  345.84    9.46
   3  -3 -17  362.65    4.29
   3  -3 -17  344.32    7.69
  -3  -3  17  351.55    9.32
   3   3 -17  380.07    9.34
  -3  -3  17  351.55    8.88
   3  -3 -17  374.05    9.25
  -3   3  17  364.50    8.97
   3  -3 -17  355.16    8.88
   3  -3 -17  360.88    8.57
  -3   3  16   59.66    3.36
   3   3 -16   61.66    3.87
  -3  -3  16   63.26    3.98
   3  -3 -16   57.93    3.10
   3  -3 -16   60.43    1.81
  -3  -3  16   56.84    3.43
   3   3 -16   62.75    3.66
  -3   3  16   61.45    3.54
   3  -3 -16   59.67    3.59
   3  -3 -16   62.14    3.59
   3  -3 -16   56.33    3.38
  -3   3  15  136.62    4.86
   3   3 -15  133.63    5.51
  -3  -3  15  146.83    5.81
   3  -3 -15  145.90    2.96
   3  -3 -15  140.00    4.70
   3  -3 -15  144.73    5.40
   3   3 -15  146.05    5.44
  -3  -3  15  141.13    5.24
  -3   3  15  140.69    5.19
   3  -3 -15  144.70    5.24
  -3  -3  15  139.07    3.01
   3  -3 -15  143.36    5.19
  -3   3  14    6.72    1.04
   3   3 -14    7.32    1.23
  -3  -3  14    5.96    1.20
   3  -3 -14    6.97    1.07
   3  -3 -14    5.89    0.62
  -3   3  14    6.09    1.04
  -3  -3  14    5.07    0.95
   3   3 -14    5.31    1.00
   3  -3 -14    7.16    1.20
  -3  -3  14    5.54    0.63
   3  -3 -14    5.52    1.06
   3  -3 -14    6.70    1.14
  -3  -3  13   41.06    1.62
  -3   3  13   41.17    2.43
  -3  -3  13   44.28    3.03
   3   3 -13   42.38    2.94
   3  -3 -13   45.35    2.55
   3  -3 -13   45.20    1.69
   3  -3 -13   46.23    2.81
   3   3 -13   45.65    2.85
  -3  -3  13   40.45    2.64
  -3   3  13   43.66    2.67
   3  -3 -13   41.55    2.69
  -3   3  13   43.79    2.64
   3  -3 -13   44.14    2.69
  -3   3  12   18.17    1.51
   3   3 -12   19.84    1.92
  -3  -3  12   21.16    2.01
  -3  -3  12   18.40    1.11
   3  -3 -12   19.91    1.14
   3  -3 -12   17.21    1.55
   3   3 -12   21.25    1.92
  -3  -3  12   18.95    1.78
   3  -3 -12   17.84    1.67
  -3   3  12   19.72    1.74
  -3   3  12   18.23    1.65
   3  -3 -12   18.21    1.74
   3  -3 -12   17.77    1.65
  -3   3  11  153.11    4.12
   3   3 -11  153.81    5.15
  -3  -3  11  152.05    3.11
  -3  -3  11  155.99    5.26
   3  -3 -11  157.72    3.27
   3  -3 -11  151.77    4.45
  -3  -3  11  154.38    4.79
  -3   3  11  148.80    4.52
   3  -3 -11  153.71    4.59
   3   3 -11  155.69    4.89
  -3   3  11  151.40    4.54
   3  -3 -11  152.28    4.57
   3  -3 -11  153.14    4.86
  -3  -3  10    8.04    1.16
  -3  -3  10    8.06    0.74
   3   3 -10    8.67    1.20
  -3   3  10    7.34    0.86
   3  -3 -10    7.79    1.04
  -3   3  10    8.64    1.09
   3  -3 -10    6.69    0.70
  -3  -3  10    6.53    1.06
   3  -3 -10    8.20    1.04
   3   3 -10    6.65    0.99
  -3   3  10    6.91    1.00
  -3   3  10    9.85    1.13
   3  -3 -10    8.34    1.00
  -3   3   9    2.02    0.44
  -3  -3   9    1.67    0.55
   3   3  -9    1.74    0.49
   3  -3  -9    1.92    0.56
   3  -3  -9    1.46    0.39
  -3   3   9    2.22    0.55
   3   3  -9    1.04    0.44
  -3  -3   9    1.64    0.48
  -3   3   9    1.69    0.55
   3  -3  -9    1.48    0.42
   3  -3  -9    1.60    0.51
  -3   3   9    1.11    0.37
  -3  -3   8  502.18    8.41
  -3   3   8  498.80    5.89
   3   3  -8  492.68    8.23
  -3   3   8  495.62    7.58
   3  -3  -8  483.48    7.51
   3  -3  -8  501.90    6.10
  -3   3   8  497.31    6.98
   3  -3  -8  489.11    6.95
   3   3  -8  486.70    7.83
  -3  -3   8  485.26    7.64
  -3   3   8  490.59    7.00
   3  -3  -8  506.26    7.09
  -3  -3   7   77.30    3.15
   3   3  -7   71.25    3.03
  -3   3   7   72.62    2.02
   3  -3  -7   77.53    2.89
  -3   3   7   72.69    2.85
   3  -3  -7   72.46    2.36
  -3  -3   7   66.78    2.81
  -3   3   7   71.60    2.50
   3  -3  -7   71.06    2.48
  -3   3   7   72.92    2.55
   3   3  -7   70.53    2.90
   3  -3  -7   74.43    2.57
   3   3  -6 5387.16   25.12
  -3  -3   6 5507.99   25.56
  -3   3   6 5367.18   15.01
  -3   3   6 5552.08   24.12
   3  -3  -6 5550.76   24.10
   3  -3  -6 5496.61   20.79
  -3   3   6 5400.83   20.51
  -3   3   6 5455.62   20.34
   3  -3  -6 5353.33   20.20
  -3  -3   6 5338.66   24.07
  -3   3   6 5447.65   20.48
   3   3  -6 5402.57   24.40
   3  -3  -6 5451.96   20.67
   3   3  -5  566.90    8.00
  -3  -3   5  594.54    8.06
  -3   3   5  565.62    4.10
   3  -3  -5  590.43    6.90
  -3   3   5  571.04    6.79
   3  -3  -5  577.64    7.65
  -3   3   5  605.59    7.88
  -3   3   5  597.83    7.78
  -3   3   5  572.31    6.18
   3  -3  -5  582.58    6.16
  -3  -3   5  583.74    7.71
   3   3  -5  579.33    7.76
   3   3  -5  569.10    8.00
   3  -3  -5  589.60    6.37
  -3   3   5  572.04    6.26
   3   3  -4 1045.97   10.34
  -3  -3   4 1072.68   10.40
   3  -3  -4 1026.30   10.19
  -3   3   4 1048.89    9.38
  -3   3   4 1056.61   10.26
  -3   3   4 1074.49   10.24
   3  -3  -4 1088.65    9.52
  -3   3   4 1042.01    7.78
   3  -3  -4 1056.56    7.79
  -3   3   4 1042.13    7.93
   3  -3  -4 1066.47    8.06
  -3  -3   4 1046.95   10.17
   3   3  -4 1067.70   10.61
  -3  -3   3  317.41    5.49
   3   3  -3  314.33    5.52
   3  -3  -3  330.88    5.35
  -3   3   3  316.98    5.61
   3  -3  -3  326.03    5.52
   3  -3  -3  313.55    5.58
  -3   3   3  314.54    5.23
  -3   3   3  318.62    5.45
   3  -3  -3  310.58    4.03
   3  -3  -3  316.63    4.20
  -3   3   3  306.90    4.13
   3   3  -3  301.19    5.58
  -3  -3   3  322.70    5.74
  -3  -3   3  318.97    5.56
   3   3  -2  863.57    8.88
  -3  -3   2  831.20    8.64
  -3   3   2  821.61    8.67
  -3   3   2  869.22    9.11
   3  -3  -2  871.49    9.10
   3  -3  -2  842.42    8.85
   3  -3  -2  853.54    8.80
   3  -3  -2  827.24    6.39
   3  -3  -2  830.02    6.70
   3   3  -2  825.29    8.99
  -3  -3   2  838.50    9.13
  -3   3   2  813.80    6.60
   3  -3  -2  816.14    8.27
   3  -3  -1   33.44    1.78
  -3  -3   1   32.79    1.67
  -3   3   1   32.53    1.79
   3  -3  -1   34.89    1.83
  -3   3   1   35.48    1.86
   3   3  -1   31.86    1.74
   3  -3  -1   33.23    1.06
  -3   3   1   32.76    1.02
  -3   3   1   33.21    1.37
   3  -3  -1   32.62    1.64
  -3  -3   1   34.82    1.88
   3  -3  -1   33.99    1.39
   3   3  -1   34.34    1.83
  -3   3   1   35.77    1.74
   3  -3  -1   32.93    1.72
   3  -3   0   50.72    1.53
  -3   3   0   47.24    1.44
   3  -3   0   48.96    2.22
  -3   3   0   45.46    2.16
   3   3   0   49.36    2.09
  -3  -3   0   45.35    1.23
  -3   3   0   47.11    2.13
  -3  -3   0   49.12    2.04
   3  -3   0   49.15    2.11
  -3  -3   0   51.28    2.27
   3  -3   0   45.92    1.86
  -3   3   0   48.41    2.11
   3   3   0   50.40    2.23
  -3   3   0   51.23    1.76
   3  -3   1  202.79    3.43
  -3   3  -1  196.51    3.38
  -3   3  -1  196.62    4.43
  -3   3  -1  212.31    4.50
   3   3   1  202.28    4.29
   3   3   1  198.78    2.71
   3  -3   1  208.14    4.56
  -3  -3  -1  199.61    4.47
   3  -3   1  199.36    4.38
   3  -3   1  204.02    3.66
   3   3   1  198.32    4.49
  -3   3  -1  200.42    4.42
  -3  -3  -1  201.08    4.57
   3  -3   2 1990.24   12.00
  -3   3  -2 1996.09   11.84
   3  -3   2 1975.42   14.36
  -3   3  -2 1999.12   13.86
   3   3   2 1985.31   13.70
  -3   3  -2 1914.13   14.13
   3   3   2 2013.49   14.64
  -3  -3  -2 1973.95   14.41
  -3   3  -2 1921.08   14.23
   3  -3   2 1968.98   14.14
   3  -3   2 1964.46   10.78
  -3  -3  -2 1976.43   14.65
   3   3   2 2012.68   14.64
  -3   3  -3    7.41    0.81
   3  -3   3    6.95    0.79
   3   3   3    6.70    0.72
  -3   3  -3    6.76    0.86
  -3   3  -3    7.14    0.93
   3   3   3    7.58    0.93
  -3  -3  -3    7.04    0.91
   3  -3   3    7.34    0.95
   3  -3   3    5.84    0.55
   3   3   3    7.11    0.93
  -3  -3  -3    5.72    0.83
  -3   3  -4  307.68    5.49
   3  -3   4  308.36    3.62
   3  -3   4  319.73    5.58
   3   3   4  323.41    4.79
  -3   3  -4  307.85    5.88
  -3   3  -4  313.32    6.16
  -3  -3  -4  313.59    6.12
   3   3   4  313.83    6.18
   3  -3   4  311.13    6.10
   3   3   4  310.40    6.14
  -3  -3  -4  313.03    6.19
   3  -3   5   72.69    1.57
   3  -3   5   75.23    2.94
  -3   3  -5   72.78    2.87
  -3   3  -5   76.77    2.94
   3   3   5   75.16    2.27
   3   3   5   76.49    3.17
  -3  -3  -5   70.62    3.08
  -3   3  -5   80.31    3.25
   3  -3   5   72.29    3.06
   3   3   5   72.09    3.08
  -3  -3  -5   73.33    3.10
  -3   3  -6  404.51    7.14
   3  -3   6  411.79    7.21
  -3   3  -6  396.85    6.90
   3   3   6  406.11    5.35
  -3   3  -6  402.50    7.60
   3   3   6  411.61    7.56
  -3  -3  -6  400.99    7.55
   3  -3   6  403.01    7.48
   3   3   6  404.65    7.56
  -3  -3  -6  412.21    7.60
   3  -3   7  294.15    6.42
  -3   3  -7  281.78    6.28
   3   3   7  287.57    4.50
  -3   3  -7  283.17    5.91
  -3  -3  -7  285.14    6.60
  -3   3  -7  293.66    6.65
   3   3   7  289.91    6.56
   3  -3   7  285.12    6.56
   3   3   7  287.53    6.60
  -3  -3  -7  290.82    6.61
   3  -3   8   18.53    1.69
  -3   3  -8   15.75    1.53
  -3   3  -8   18.77    1.51
   3   3   8   16.75    0.76
   3   3   8   17.19    1.13
  -3  -3  -8   17.01    1.14
   3  -3   8   19.40    1.83
   3  -3   8   16.41    1.57
  -3   3  -8   18.81    1.76
   3   3   8   18.07    1.76
  -3  -3  -8   18.65    1.74
  -3  -3  -8   14.57    1.57
   3   3   8   16.82    1.65
   3  -3   9    0.97    0.51
  -3   3  -9    0.39    0.35
  -3  -3  -9    0.76    0.26
  -3   3  -9    0.63    0.40
   3   3   9    1.20    0.40
   3  -3   9    2.02    0.67
  -3   3  -9    0.53    0.37
  -3  -3  -9    0.72    0.39
   3  -3   9    0.91    0.30
   3   3   9    1.07    0.67
   3   3   9    1.51    0.65
  -3  -3  -9    0.97    0.42
  -3   3 -10  201.17    6.09
   3  -3  10  209.28    6.26
  -3  -3 -10  197.72    3.99
  -3   3 -10  204.88    5.30
  -3  -3 -10  214.52    6.33
   3  -3  10  211.41    6.28
   3   3  10  203.63    6.14
  -3   3 -10  221.00    6.47
   3  -3  10  208.42    5.95
   3   3  10  212.87    6.33
  -3  -3 -10  201.88    6.16
   3  -3  11  108.30    4.77
   3   3  11  107.09    4.49
  -3   3 -11  105.64    4.59
  -3  -3 -11  103.67    2.96
  -3   3 -11  103.64    3.84
   3  -3  11  104.59    4.40
   3   3  11  112.07    4.73
  -3   3 -11  108.39    4.70
   3  -3  11  102.44    4.52
  -3  -3 -11  112.31    4.73
   3   3  11  111.94    4.71
  -3  -3 -11  108.09    4.64
   3  -3  12   19.28    2.06
   3   3  12   19.58    1.99
  -3   3 -12   17.94    1.97
  -3   3 -12   18.05    1.62
  -3  -3 -12   16.96    1.21
  -3  -3 -12   18.37    2.01
  -3   3 -12   18.47    2.01
   3   3  12   16.96    1.85
   3  -3  12   16.41    1.90
   3  -3  12   15.11    1.72
  -3  -3 -12   16.78    1.90
   3   3  12   18.51    2.02
  -3   3 -13   11.95    1.65
   3   3  13   13.83    1.78
   3  -3  13   13.12    1.76
  -3  -3 -13   12.60    1.09
  -3   3 -13   14.21    1.48
  -3  -3 -13   12.88    1.71
   3  -3  13   13.30    1.72
   3   3  13   12.09    1.69
  -3   3 -13   13.65    1.79
   3  -3  13   12.16    1.72
   3   3  13   13.41    1.79
  -3  -3 -13   13.23    1.78
   3   3  14  451.44   10.26
   3  -3  14  465.78   10.78
  -3   3 -14  438.32   10.34
  -3   3 -14  422.72    8.08
  -3  -3 -14  425.16    6.42
  -3  -3 -14  457.99   10.54
   3   3  14  453.73   10.43
   3  -3  14  418.74   10.22
  -3   3 -14  471.66   10.80
   3  -3  14  436.93   10.06
  -3  -3 -14  432.80   10.26
   3   3  14  450.41   10.47
   3   3  15   95.14    4.84
  -3   3 -15   89.42    4.82
  -3   3 -15   82.70    3.64
  -3  -3 -15   85.52    2.94
   3  -3  15   85.68    4.63
   3  -3  15   87.05    4.77
   3   3  15   89.14    4.77
  -3  -3 -15   88.51    4.79
  -3   3 -16  180.64    7.07
  -3   3 -16  175.80    5.35
  -3  -3 -16  181.64    4.38
   3   3  16  178.07    6.95
   3  -3  16  174.11    6.79
   3  -3  16  184.76    7.14
  -3  -3 -16  177.49    6.95
  -3   3 -17   29.70    2.96
  -3   3 -17   30.86    2.29
  -3  -3 -17   32.93    1.92
   3  -3  17   31.97    3.03
   3   3  17   36.47    3.27
   3  -3  17   30.54    2.99
  -3   3 -17   34.99    3.15
  -3  -3 -17   32.90    3.08
  -3   3 -18  735.13   15.20
  -3  -3 -18  739.01    9.22
  -3   3 -18  716.18   11.08
   3   3  18  742.41   15.04
   3  -3  18  725.94   14.73
   3  -3  18  728.04   14.99
  -3   3 -18  729.72   14.73
  -3  -3 -18  746.19   15.15
  -3   3 -19   64.05    4.64
  -3  -3 -19   65.15    2.80
  -3   3 -19   60.50    3.25
   3  -3  19   64.90    4.52
   3   3  19   67.61    4.64
  -3   3 -19   64.93    4.59
  -3  -3 -19   66.87    4.66
  -3   3 -20  354.79   11.22
  -3   3 -20  343.04    7.78
  -3  -3 -20  352.24    6.63
   3  -3  20  346.59   10.75
   3   3  20  350.60   10.91
  -3  -3 -20  363.60   11.17
  -3   3 -20  343.07   10.82
  -3   3 -21   10.50    1.35
   3  -3  21   10.59    2.02
   3   3  21   12.24    2.16
  -3  -3 -21   10.05    1.95
  -3   3 -21    9.25    1.88
   3  -3  22  221.07    9.15
   3   3  22  232.28    9.43
  -3   3 -22  224.04    9.17
  -3  -3 -22  239.40    9.55
   3  -3  23    6.28    1.51
   3   3  23    7.25    1.74
  -3   3 -23    8.09    1.85
  -3  -3 -23    7.18    1.76
   3   3  24   49.14    4.59
   3  -3  24   38.53    4.08
  -3   3 -24   41.78    4.17
  -3  -3 -24   44.83    4.42
   3   3  25   14.57    2.55
   3  -3  25   10.85    2.09
  -3   3 -25   12.65    2.41
  -3  -3 -25    9.82    2.13
   3  -3  26  108.34    7.11
   3   3  26  112.75    7.32
  -3   3 -26  109.23    7.18
  -3  -3 -26  113.24    7.30
  -3   5  29    0.46    0.74
   3  -5 -29   -0.07    0.93
   3   5 -28   40.67    4.52
  -3  -5  28   40.89    4.45
  -3   5  28   43.70    4.47
   3  -5 -28   38.91    4.22
   3   5 -27   10.93    2.38
  -3   5  27   10.59    2.16
  -3  -5  27    9.66    2.30
  -3  -5  27    8.48    2.01
   3  -5 -27    9.92    2.01
   3   5 -26  338.31   12.46
  -3  -5  26  328.42   12.17
  -3  -5  26  322.75   11.61
  -3   5  26  336.60   11.72
   3  -5 -26  335.42   11.72
   3   5 -25   -0.40    0.58
  -3  -5  25    0.49    0.49
  -3   5  25    2.08    1.13
  -3  -5  25    0.46    0.65
   3  -5 -25   -1.09    1.11
   3   5 -24  252.42   10.24
  -3   5  24  257.57    9.69
  -3  -5  24  244.43    9.94
  -3  -5  24  255.99    9.85
   3  -5 -24  259.02    9.73
   3   5 -23    0.19    0.65
  -3  -5  23   -0.21    0.81
  -3  -5  23    0.88    0.86
  -3   5  23    1.44    0.76
   3  -5 -23    1.50    0.86
   3   5 -22  396.31   12.23
   3  -5 -22  405.55    9.85
  -3   5  22  381.46   11.15
  -3  -5  22  391.98   11.89
  -3  -5  22  379.51   11.38
   3  -5 -22  387.06   11.26
   3   5 -21    9.43    1.90
   3  -5 -21    7.78    1.34
  -3  -5  21    8.15    1.69
  -3  -5  21   10.75    2.02
  -3   5  21    9.96    1.74
   3  -5 -21    8.27    1.60
  -3   5  20  321.84    8.97
   3   5 -20  322.93   10.50
   3  -5 -20  320.82    8.50
  -3  -5  20  324.18    9.98
  -3   5  20  332.91    9.83
   3  -5 -20  331.22    9.87
  -3   5  19   99.26    4.79
   3   5 -19   99.17    5.66
   3  -5 -19  102.48    4.75
  -3  -5  19  100.23    5.42
  -3   5  19  105.12    5.35
   3  -5 -19  100.28    5.28
   3   5 -18 1239.26   19.40
  -3   5  18 1248.27   16.41
   3  -5 -18 1403.63   17.29
  -3  -5  18 1248.25   18.56
  -3   5  18 1253.81   17.96
   3  -5 -18 1288.08   18.30
  -3   5  17    2.66    0.65
   3   5 -17    4.57    1.23
   3  -5 -17    4.33    1.04
  -3   5  17    3.55    1.02
  -3  -5  17    2.06    0.72
  -3  -5  17    3.22    0.42
   3  -5 -17    4.71    1.09
  -3  -5  16   27.62    1.30
  -3   5  16   27.66    2.27
   3   5 -16   27.73    2.74
   3  -5 -16   27.71    2.34
  -3  -5  16   29.33    2.71
  -3   5  16   27.94    2.52
   3  -5 -16   30.77    2.71
   3  -5 -16   28.04    2.57
   3  -5 -16   29.70    2.81
  -3   5  16   28.43    2.59
  -3   5  15  112.28    4.33
  -3  -5  15  112.38    2.76
   3   5 -15  109.51    5.33
   3  -5 -15  113.49    4.70
  -3  -5  15  111.01    5.17
  -3   5  15  114.86    4.96
   3   5 -15  121.90    5.51
   3  -5 -15  123.06    5.19
   3  -5 -15  115.83    5.01
  -3   5  15  114.37    4.98
  -3  -5  14   92.26    4.82
  -3   5  14   84.00    3.59
   3   5 -14   86.31    4.57
  -3  -5  14   86.80    2.52
  -3   5  14   83.88    3.94
   3  -5 -14   86.24    4.01
   3   5 -14   91.90    4.66
   3  -5 -14   88.21    4.24
  -3   5  14   86.27    4.17
  -3  -5  14   83.46    4.36
   3  -5 -14   84.80    4.15
  -3   5  14   83.67    4.13
   3   5 -13   12.93    1.78
  -3  -5  13   12.98    1.81
  -3  -5  13   12.60    1.00
  -3   5  13   12.53    1.32
   3  -5 -13   12.95    1.50
  -3   5  13   12.65    1.53
   3  -5 -13   12.84    1.55
   3   5 -13   16.41    1.92
  -3   5  13   14.46    1.65
  -3  -5  13   12.42    1.64
   3  -5 -13   14.29    1.69
  -3   5  13   11.89    1.51
  -3   5  12   21.92    1.65
  -3  -5  12   24.05    2.34
   3   5 -12   21.38    2.16
   3  -5 -12   23.70    2.06
  -3   5  12   22.10    2.01
   3   5 -12   24.88    2.32
   3  -5 -12   21.64    2.01
  -3   5  12   22.66    2.04
  -3  -5  12   20.83    2.13
  -3   5  12   24.89    2.13
   3  -5 -12   21.18    1.95
   3   5 -11    1.58    0.58
  -3   5  11    1.62    0.46
  -3  -5  11    1.30    0.58
   3  -5 -11    0.67    0.35
  -3   5  11    0.97    0.40
  -3  -5  11    1.27    0.48
  -3   5  11    0.70    0.33
   3  -5 -11    1.30    0.53
   3  -5 -11    1.71    0.56
  -3   5  11    0.88    0.46
   3   5 -11    0.81    0.32
  -3  -5  10   15.22    1.76
   3   5 -10   13.07    1.62
  -3   5  10   14.90    1.20
  -3   5  10   14.97    1.64
   3  -5 -10   17.70    1.41
   3  -5 -10   15.24    1.64
   3  -5 -10   14.64    1.51
  -3  -5  10   14.11    1.69
  -3   5  10   14.20    1.50
   3  -5 -10   14.23    1.51
   3   5 -10   14.21    1.69
  -3   5  10   14.32    1.48
  -3   5   9  129.01    3.27
   3   5  -9  124.42    4.84
  -3  -5   9  134.94    5.01
  -3   5   9  133.35    4.73
  -3   5   9  126.81    4.59
   3  -5  -9  129.59    4.66
  -3   5   9  126.33    3.85
   3  -5  -9  134.71    3.98
  -3  -5   9  127.60    4.84
  -3   5   9  130.45    4.31
   3  -5  -9  132.03    4.31
  -3   5   9  128.04    4.29
   3   5  -9  142.06    5.19
   3   5  -9  139.26    5.14
   3  -5  -9  131.43    4.35
  -3  -5   8  245.61    6.63
  -3   5   8  223.58    4.03
   3   5  -8  225.92    6.30
  -3   5   8  226.65    5.19
  -3   5   8  232.36    6.12
  -3   5   8  227.12    6.03
   3  -5  -8  236.43    6.18
   3  -5  -8  237.91    5.33
   3  -5  -8  230.31    5.47
  -3   5   8  225.43    5.47
  -3  -5   8  233.21    6.40
  -3   5   8  228.65    5.56
   3  -5  -8  233.05    5.65
   3   5  -8  238.31    6.60
   3   5  -8  237.20    6.54
   3   5  -7  266.97    6.65
  -3  -5   7  281.50    6.84
  -3   5   7  264.14    5.75
  -3   5   7  270.73    4.13
  -3   5   7  277.47    6.49
   3  -5  -7  280.60    5.88
   3  -5  -7  271.93    6.60
  -3   5   7  269.27    6.53
   3  -5  -7  267.51    5.68
  -3   5   7  268.85    5.75
  -3  -5   7  267.43    6.77
   3  -5  -7  270.86    5.89
  -3   5   7  265.82    5.77
   3   5  -7  277.51    7.02
   3   5  -7  279.88    7.05
   3   5  -6 1820.89   16.87
  -3  -5   6 1887.06   17.19
  -3   5   6 1815.33   16.34
   3  -5  -6 1862.90   17.33
  -3   5   6 1866.60   10.19
  -3   5   6 1814.26   15.24
  -3   5   6 1926.92   17.36
   3  -5  -6 1795.98   14.25
  -3  -5   6 1805.25   17.40
   3  -5  -6 1862.25   14.94
   3   5  -6 1898.26   17.96
  -3   5   6 1786.20   14.58
   3   5  -6 1876.64   17.80
   3   5  -5   21.32    1.78
  -3  -5   5   15.16    1.50
  -3   5   5   15.80    0.91
  -3   5   5   16.75    1.64
  -3   5   5   14.14    1.41
   3  -5  -5   16.26    1.64
  -3   5   5   14.88    1.48
   3  -5  -5   15.38    1.32
   3  -5  -5   15.06    1.34
   3   5  -5   13.76    1.50
  -3  -5   5   15.59    1.58
  -3   5   5   15.71    1.34
   3   5  -4 1849.81   16.15
  -3  -5   4 1852.70   16.06
  -3   5   4 1816.91    9.55
   3  -5  -4 1864.89   16.98
  -3   5   4 1908.68   17.08
  -3   5   4 1832.08   15.75
   3  -5  -4 1780.69   15.83
   3  -5  -4 1816.42   13.58
   3  -5  -4 1831.83   14.21
  -3   5   4 1822.42   14.02
  -3  -5   4 1812.22   17.10
   3   5  -4 1842.30   17.08
  -3  -5   4 1835.95   16.94
  -3   5   3   56.51    1.71
   3   5  -3   61.91    2.90
  -3  -5   3   56.79    2.76
   3  -5  -3   56.30    2.81
   3  -5  -3   58.18    1.69
  -3   5   3   54.38    2.81
  -3   5   3   57.91    3.06
   3  -5  -3   57.79    2.41
   3  -5  -3   56.12    2.87
   3   5  -3   53.87    2.87
  -3  -5   3   53.76    2.87
  -3   5   3   56.26    2.43
  -3  -5   3   53.31    2.92
   3  -5  -3   56.33    2.46
  -3   5   2 2666.16   20.11
   3  -5  -2 2498.29   18.72
  -3  -5   2 2547.03   18.00
  -3   5   2 2504.87   18.89
   3  -5  -2 2452.34   11.70
  -3   5   2 2493.07   11.86
   3   5  -2 2568.15   18.33
   3  -5  -2 2489.74   19.04
   3   5  -2 2539.81   19.60
  -3  -5   2 2515.36   20.13
  -3  -5   2 2497.66   19.53
   3  -5  -2 2513.41   16.36
  -3   5   2 2496.46   16.17
  -3   5   1   22.01    1.88
  -3  -5   1   20.50    1.28
   3  -5  -1   19.37    1.64
  -3  -5   1   18.88    1.55
  -3   5   1   19.91    1.76
   3  -5  -1   20.71    1.18
  -3   5   1   19.60    1.14
   3   5  -1   21.46    1.65
   3   5  -1   20.34    1.74
   3  -5  -1   18.72    1.65
   3  -5  -1   19.12    1.46
  -3  -5   1   19.02    1.69
  -3   5   1   18.38    1.43
  -3  -5   0 1955.84   12.16
  -3   5   0 2066.99   17.79
  -3   5   0 2002.32   17.40
  -3  -5   0 2013.65   15.60
   3   5   0 2030.91   16.04
  -3   5   0 2003.57   12.17
   3  -5   0 2022.26   12.28
  -3  -5   0 1989.60   17.42
  -3   5   0 1965.43   14.69
   3   5   0 2008.30   17.38
   3  -5   0 2000.14   17.33
   3   5   1  231.66    5.38
  -3   5  -1  219.01    4.31
   3  -5   1  221.30    4.42
  -3   5  -1  211.32    5.77
  -3  -5  -1  226.65    5.24
  -3   5  -1  221.86    5.95
  -3  -5  -1  214.89    5.68
   3  -5   1  215.40    5.75
  -3  -5  -1  216.39    5.77
  -3   5  -1  220.24    5.86
  -3   5  -1  212.38    4.93
   3   5   1  223.57    5.82
   3  -5   2  894.37    9.38
  -3   5  -2  873.72    9.17
  -3   5  -2  972.64   12.35
  -3   5  -2  878.73   11.84
   3   5   2  892.39   10.63
  -3  -5  -2  878.17   11.73
   3  -5   2  877.63   11.80
   3   5   2  891.45   11.77
  -3   5  -2  866.16   10.24
  -3   5  -2  894.08   11.98
  -3  -5  -2  891.05   11.84
   3  -5   3   57.48    2.52
  -3   5  -3   53.52    2.41
  -3   5  -3   54.77    3.01
   3   5   3   53.99    2.64
   3   5   3   59.02    2.80
   3   5   3   53.25    2.11
  -3  -5  -3   54.45    2.94
   3  -5   3   54.10    2.99
   3   5   3   52.99    2.92
  -3   5  -3   55.29    2.66
  -3  -5  -3   53.31    2.97
  -3   5  -3   51.05    2.94
   3  -5   4  179.37    4.71
  -3   5  -4  175.01    4.59
   3   5   4  180.54    4.03
   3   5   4  183.09    4.94
   3   5   4  175.36    4.80
  -3   5  -4  179.41    5.52
   3  -5   4  169.73    5.38
  -3  -5  -4  183.24    5.56
  -3   5  -4  183.24    5.68
   3   5   4  174.38    5.42
  -3  -5  -4  177.42    5.49
  -3   5  -4  174.75    4.89
  -3   5  -5   31.77    2.06
   3  -5   5   35.03    2.20
  -3   5  -5   34.76    2.45
   3   5   5   34.97    2.13
   3   5   5   34.46    2.20
   3   5   5   34.15    1.85
  -3  -5  -5   34.71    2.43
   3   5   5   32.83    2.36
   3  -5   5   34.39    2.50
  -3  -5  -5   35.10    2.48
   3   5   5   34.38    2.43
   3  -5   5   34.76    1.71
  -3   5  -5   34.39    2.53
  -3   5  -6  330.69    6.97
   3  -5   6  333.03    7.11
   3   5   6  336.25    6.54
  -3   5  -6  334.45    7.69
  -3  -5  -6  328.35    7.69
  -3   5  -6  345.47    8.13
   3   5   6  292.97    7.30
   3  -5   6  323.55    7.78
   3  -5   6  322.09    4.86
  -3  -5  -6  337.39    7.81
   3   5   6  345.22    7.95
   3  -5   7    4.79    0.95
  -3   5  -7    5.40    0.99
   3   5   7    3.31    0.63
  -3   5  -7    3.76    0.86
   3  -5   7    4.13    0.95
   3   5   7    5.86    1.09
  -3  -5  -7    4.84    1.02
   3  -5   7    4.70    0.56
  -3   5  -7    5.00    0.99
   3   5   7    4.45    0.88
  -3  -5  -7    4.64    1.00
   3  -5   8  137.28    4.98
  -3   5  -8  137.54    4.94
   3  -5   8  132.10    2.55
  -3   5  -8  136.48    5.07
   3   5   8  135.06    3.50
   3   5   8  143.63    4.26
   3  -5   8  131.80    5.24
   3   5   8  139.98    5.30
  -3   5  -8  139.26    5.45
  -3  -5  -8  148.36    5.42
  -3  -5  -8  135.46    5.23
   3   5   8  149.08    5.49
  -3   5  -9   60.96    3.41
   3  -5   9   59.80    1.37
   3  -5   9   62.82    3.52
  -3   5  -9   59.06    3.38
   3   5   9   63.95    2.85
   3   5   9   57.97    2.16
   3  -5   9   59.02    3.59
   3   5   9   59.20    3.52
  -3  -5  -9   57.25    3.47
  -3   5  -9   63.47    3.76
  -3  -5  -9   63.81    3.69
   3   5   9   60.41    3.61
  -3   5 -10   36.22    2.74
   3  -5  10   37.95    2.81
  -3   5 -10   35.96    2.67
   3   5  10   35.78    2.16
   3   5  10   36.36    1.62
   3  -5  10   37.10    2.94
   3   5  10   38.95    2.96
  -3  -5 -10   35.87    2.83
  -3   5 -10   41.11    3.17
   3   5  10   34.96    2.81
  -3  -5 -10   35.47    2.80
   3  -5  11   83.85    4.35
  -3   5 -11   78.89    4.17
  -3   5 -11   79.61    4.05
   3   5  11   80.93    2.22
   3   5  11   85.10    3.34
  -3  -5 -11   86.27    4.49
   3  -5  11   81.68    4.43
   3   5  11   82.54    4.40
  -3   5 -11   90.65    4.73
   3   5  11   87.79    4.56
  -3  -5 -11   83.55    4.42
   3  -5  12  123.29    5.47
  -3   5 -12  110.22    5.12
   3   5  12  113.12    2.25
   3   5  12  115.39    3.91
  -3   5 -12  116.08    4.96
   3   5  12  112.72    5.31
   3  -5  12  119.56    5.47
  -3  -5 -12  114.19    5.30
   3  -5  13   26.78    2.64
   3   5  13   27.30    2.48
  -3   5 -13   26.07    2.57
   3   5  13   25.97    1.88
  -3   5 -13   24.49    2.27
   3   5  13   26.48    2.60
   3  -5  13   26.99    2.52
   3  -5  13   23.50    2.48
  -3  -5 -13   28.78    2.71
   3   5  14  840.95   14.25
  -3   5 -14  831.60   14.92
  -3   5 -14  811.37   13.42
   3  -5  14  809.28   14.29
   3  -5  14  815.72   15.09
   3   5  14  815.14   14.95
  -3  -5 -14  812.29   14.97
  -3   5 -15    1.62    0.88
  -3   5 -15    1.78    0.65
   3  -5  15    1.76    0.81
   3   5  15    2.08    0.72
   3  -5  15    4.22    1.32
  -3  -5 -15    2.67    0.93
  -3   5 -16  630.92   13.86
  -3   5 -16  601.63   11.84
   3   5  16  641.66   13.92
   3  -5  16  616.36   13.25
   3  -5  16  658.93   14.29
  -3  -5 -16  630.52   13.85
  -3   5 -17    5.81    1.69
  -3   5 -17    4.28    1.11
  -3  -5 -17    4.77    0.86
   3   5  17    3.94    1.23
   3  -5  17    4.70    1.37
   3  -5  17    5.93    1.46
  -3  -5 -17    4.87    1.27
  -3   5 -18  748.07   16.04
  -3  -5 -18  745.73   10.61
  -3   5 -18  742.43   13.41
   3   5  18  767.90   16.04
   3  -5  18  791.63   16.57
   3  -5  18  770.84   15.71
  -3  -5 -18  793.43   16.31
  -3   5 -19   81.68    5.44
  -3  -5 -19   81.05    3.54
   3  -5  19   85.64    5.38
   3  -5  19   87.77    5.65
   3   5  19   89.90    5.65
  -3  -5 -19   86.42    5.54
  -3   5 -20  331.96   11.24
   3  -5  20  339.10   11.01
   3  -5  20  348.12   11.51
   3   5  20  347.24   11.33
  -3  -5 -20  344.53   11.35
  -3   5 -21   20.90    2.83
   3  -5  21   18.56    2.74
   3   5  21   16.98    2.66
   3  -5  21   20.00    2.81
  -3  -5 -21   19.14    2.78
  -3   5 -22  164.07    8.32
   3  -5  22  179.36    8.67
   3   5  22  177.88    8.57
   3  -5  22  164.42    8.13
  -3  -5 -22  177.35    8.53
  -3   5 -22  170.79    8.22
  -3   5 -23    4.75    1.53
   3  -5  23    2.90    1.23
   3  -5  23    3.78    1.39
   3   5  23    2.57    1.02
  -3   5 -23    3.10    0.99
  -3  -5 -23    2.92    0.95
  -3   5 -24   19.84    3.10
   3  -5  24   14.46    2.45
   3   5  24   21.27    3.24
  -3   5 -24   21.94    3.13
  -3  -5 -24   21.11    3.13
   3  -5  25   19.88    3.03
   3   5  25   22.08    3.29
  -3  -5 -25   22.64    3.29
  -3   5 -25   22.96    3.40
   3  -5  26    1.50    1.18
  -3  -7  27   20.02    3.08
  -3   7  27   21.25    3.27
   3  -7 -27   21.30    3.11
   3   7 -26  106.33    7.27
  -3  -7  26  104.50    7.11
  -3   7  26   98.55    6.65
  -3  -7  26   98.03    6.81
   3  -7 -26   97.16    6.65
   3   7 -25   -0.74    0.83
  -3  -7  25    0.44    0.63
  -3  -7  25    1.95    1.16
  -3   7  25    0.16    0.63
   3  -7 -25    1.14    0.88
   3   7 -24  254.78   10.85
  -3  -7  24  267.67   10.93
  -3   7  24  257.43   10.27
  -3  -7  24  267.20   10.68
   3  -7 -24  254.06   10.19
   3   7 -23   43.37    4.40
  -3   7  23   46.11    4.20
  -3  -7  23   45.64    4.40
  -3  -7  23   43.49    4.20
   3  -7 -23   49.72    4.35
   3   7 -22   70.53    5.42
  -3   7  22   72.04    5.12
  -3  -7  22   69.97    5.23
   3  -7 -22   72.62    5.12
   3   7 -21   52.16    4.56
  -3  -7  21   53.18    4.47
  -3   7  21   56.65    4.47
   3  -7 -21   54.22    4.35
   3   7 -20  303.51   10.73
  -3   7  20  304.44    8.73
  -3  -7  20  301.38   10.43
  -3   7  20  304.48   10.01
   3  -7 -20  313.64   10.15
   3   7 -19    7.02    1.65
  -3   7  19    5.14    1.11
  -3  -7  19    5.44    1.34
  -3   7  19    5.26    1.28
   3  -7 -19    7.04    1.51
  -3  -7  18  153.27    2.80
  -3   7  18  148.59    5.66
   3   7 -18  145.05    7.07
  -3   7  18  152.76    6.72
  -3  -7  18  149.26    7.07
   3  -7 -18  148.17    6.61
  -3  -7  17   18.31    1.14
   3   7 -17   15.76    2.29
  -3   7  17   17.14    1.85
  -3   7  17   17.54    2.11
  -3  -7  17   17.08    2.36
  -3   7  17   18.56    2.30
   3  -7 -17   17.50    2.20
  -3   7  16  386.11    8.44
  -3  -7  16  389.17    5.84
   3   7 -16  391.26   11.03
  -3   7  16  394.43    9.85
  -3   7  16  392.79   10.17
  -3  -7  16  390.12   11.00
   3  -7 -16  402.96   10.40
   3   7 -15  383.43   10.68
  -3  -7  15  387.99    6.16
  -3   7  15  371.36    7.95
  -3   7  15  382.24    9.62
  -3   7  15  382.96   10.05
   3  -7 -15  386.02    9.75
  -3   7  15  381.21    9.82
  -3  -7  15  377.05   10.59
   3  -7 -15  377.63    9.80
   3   7 -14   72.76    4.57
  -3   7  14   75.44    3.43
   3  -7 -14   74.66    4.31
  -3   7  14   74.15    4.35
  -3   7  14   72.76    4.19
  -3   7  14   74.61    4.22
  -3  -7  14   81.54    4.84
   3  -7 -14   77.11    4.33
   3  -7 -14   71.55    4.19
  -3   7  14   79.75    4.42
   3   7 -13  128.27    5.91
  -3   7  13  128.07    4.26
  -3   7  13  127.35    5.47
   3  -7 -13  129.46    5.56
  -3   7  13  130.12    5.58
  -3   7  13  130.98    5.45
   3  -7 -13  140.85    5.63
  -3  -7  13  130.41    6.00
  -3   7  13  130.84    5.49
   3  -7 -13  128.94    5.45
  -3   7  12   30.40    1.99
  -3  -7  12   33.92    3.10
   3   7 -12   33.23    2.94
  -3   7  12   30.65    2.66
  -3   7  12   32.48    2.76
   3  -7 -12   30.00    2.64
  -3   7  12   31.81    2.23
  -3   7  12   32.21    2.04
   3  -7 -12   34.75    2.76
  -3  -7  12   33.58    2.97
  -3   7  12   33.99    2.69
  -3   7  12   31.03    2.59
   3  -7 -12   34.38    2.71
   3   7 -11    6.98    1.37
  -3   7  11    8.20    1.00
  -3  -7  11    8.11    1.46
  -3   7  11    7.56    0.97
  -3   7  11    6.77    1.02
  -3   7  11    8.29    1.30
   3  -7 -11    8.55    1.43
  -3   7  11    7.62    1.35
  -3   7  11    7.55    1.23
  -3  -7  11    7.97    1.41
   3  -7 -11    7.05    1.20
   3  -7 -11    9.78    1.48
  -3   7  11    7.97    1.30
   3   7 -10    2.30    0.77
  -3  -7  10    3.04    0.86
  -3   7  10    3.57    0.63
  -3   7  10    2.11    0.81
  -3   7  10    2.48    0.55
   3  -7 -10    2.76    0.77
  -3   7  10    3.43    0.76
  -3   7  10    4.79    1.04
  -3  -7  10    3.24    0.93
  -3   7  10    2.78    0.81
   3  -7 -10    2.81    0.81
   3   7 -10    3.82    1.13
  -3   7  10    3.29    0.83
   3  -7 -10    3.43    0.83
   3   7 -10    3.48    0.99
   3   7  -9  188.70    6.51
  -3  -7   9  203.37    6.81
  -3   7   9  198.66    4.43
  -3   7   9  189.97    5.70
  -3   7   9  193.36    6.32
   3  -7  -9  194.75    6.58
  -3   7   9  193.85    6.56
  -3  -7   9  188.42    6.81
   3  -7  -9  189.38    5.86
   3   7  -9  200.10    7.02
  -3   7   9  191.11    6.02
   3  -7  -9  189.28    6.02
   3   7  -9  212.73    7.39
  -3  -7   8  279.69    7.81
  -3   7   8  275.40    5.07
   3   7  -8  261.48    7.51
  -3   7   8  271.74    7.71
  -3   7   8  264.75    7.25
  -3   7   8  268.52    6.86
  -3  -7   8  264.68    8.02
   3  -7  -8  270.68    6.86
   3  -7  -8  264.98    6.97
   3   7  -8  277.42    8.15
  -3   7   8  276.82    7.09
   3   7  -7  393.27    9.01
  -3   7   7  408.57    6.00
  -3  -7   7  417.70    9.31
  -3   7   7  411.35    8.87
  -3   7   7  410.81    8.64
  -3   7   7  407.71    9.48
   3  -7  -7  396.94    8.18
  -3  -7   7  407.53    9.80
  -3   7   7  405.39    8.41
   3  -7  -7  405.18    8.46
   3   7  -7  424.12    9.92
  -3  -7   6  228.93    6.74
  -3   7   6  233.08    4.42
   3   7  -6  216.79    6.53
  -3   7   6  228.53    7.05
  -3   7   6  231.69    6.53
   3  -7  -6  227.91    6.03
  -3  -7   6  222.49    7.23
   3   7  -6  235.27    7.28
   3  -7  -6  222.99    6.21
  -3   7   6  218.91    6.07
  -3  -7   5    0.65    0.35
  -3   7   5    0.63    0.26
   3   7  -5    0.74    0.32
  -3   7   5    2.25    0.77
  -3   7   5    0.21    0.33
   3  -7  -5    1.09    0.40
   3  -7  -5    0.91    0.42
   3   7  -5    1.83    0.67
  -3  -7   5    0.74    0.46
  -3   7   5    1.23    0.56
  -3  -7   4  394.43    8.46
   3   7  -4  385.77    8.46
  -3   7   4  401.62    5.79
  -3   7   4  390.13    8.67
  -3   7   4  395.25    9.27
   3  -7  -4  375.32    8.39
   3  -7  -4  392.03    7.78
   3   7  -4  396.03    9.29
   3  -7  -4  386.90    7.97
  -3  -7   4  378.44    9.31
   3  -7  -4  390.49    9.17
  -3   7   4  391.56    7.93
  -3   7   3   33.29    1.71
   3   7  -3   32.99    2.41
   3  -7  -3   31.81    2.45
   3  -7  -3   31.74    1.62
  -3   7   3   33.37    2.57
  -3  -7   3   34.38    2.45
  -3   7   3   36.70    2.85
   3  -7  -3   33.09    2.23
  -3  -7   3   32.90    2.67
   3  -7  -3   30.75    2.25
  -3   7   3   33.09    2.29
   3  -7  -3   31.77    2.60
   3   7  -3   34.60    2.71
  -3  -7   3   32.55    2.73
  -3   7   2  221.51    4.50
   3   7  -2  222.12    6.25
  -3  -7   2  223.67    6.14
  -3   7   2  230.50    6.81
  -3   7   2  225.33    7.00
   3  -7  -2  225.66    6.47
  -3  -7   2  217.22    5.23
   3  -7  -2  224.43    4.43
   3  -7  -2  220.68    5.79
   3   7  -2  225.80    6.90
   3  -7  -2  221.07    6.00
  -3   7   2  222.51    5.96
  -3  -7   2  218.71    6.79
  -3  -7   2  218.22    7.05
   3  -7  -2  219.78    6.84
  -3   7   1    0.95    0.65
  -3  -7   1    0.81    0.30
  -3  -7   1    0.35    0.33
  -3   7   1    0.93    0.63
   3  -7  -1    1.28    0.39
   3  -7  -1    0.60    0.35
  -3   7   1   -0.04    0.46
   3   7  -1    1.35    0.40
  -3  -7   1    0.95    0.60
   3   7  -1    0.02    0.49
  -3   7   1    1.43    0.53
   3  -7  -1    1.13    0.48
   3  -7  -1    1.16    0.46
  -3  -7   1    1.92    0.58
   3  -7   0 1154.92   11.19
   3   7   0 1211.20   14.21
  -3   7   0 1170.51   11.19
  -3  -7   0 1140.39   11.72
  -3   7   0 1205.85   16.22
  -3  -7   0 1158.28   13.67
   3  -7   0 1171.41   14.97
  -3   7   0 1191.46   15.89
  -3  -7   0 1197.62   15.69
   3   7   0 1179.45   15.68
   3  -7   0 1142.59   15.68
  -3  -7   0 1141.29   15.48
  -3   7   0 1153.58   13.69
   3  -7   1   83.86    3.15
   3   7   1   88.24    3.84
  -3   7  -1   82.56    3.13
  -3   7  -1   86.38    4.42
  -3   7  -1   89.05    4.40
  -3  -7  -1   73.71    3.87
   3  -7   1   77.04    4.13
  -3  -7  -1   80.68    4.15
  -3   7  -1   80.91    3.66
   3   7   1   82.37    4.15
   3  -7   2  816.25   10.31
   3   7   2  819.11   11.65
  -3   7  -2  796.79   10.10
  -3   7  -2  804.86   13.49
  -3   7  -2  828.37   13.48
   3   7   2  810.67   12.67
   3  -7   2  764.98   13.09
  -3  -7  -2  824.69   13.14
   3   7   2  811.67   13.14
  -3  -7  -2  808.33   13.19
  -3   7  -2  788.15   11.72
  -3   7  -3    0.09    0.28
   3  -7   3    0.81    0.39
  -3   7  -3    0.02    0.42
   3   7   3   -0.07    0.60
   3   7   3    0.33    0.26
  -3   7  -3    2.09    0.77
   3  -7   3    2.46    0.81
  -3  -7  -3   -0.18    0.56
   3   7   3    0.81    0.48
  -3   7  -3    0.53    0.40
  -3   7  -3    0.97    0.37
  -3  -7  -3   -0.39    0.69
   3  -7   4  869.34   11.68
  -3   7  -4  844.71   11.28
  -3   7  -4  883.26   14.21
   3   7   4  864.71   12.97
   3   7   4  868.81   12.16
  -3   7  -4  847.16   13.86
  -3  -7  -4  883.66   13.93
   3  -7   4  846.24   13.99
   3   7   4  874.83   13.90
  -3   7  -4  830.37   12.47
  -3   7  -4  895.17   14.65
  -3  -7  -4  833.35   13.60
  -3   7  -5   65.87    3.29
   3  -7   5   63.42    3.25
  -3   7  -5   70.56    4.05
   3   7   5   64.48    3.34
   3   7   5   64.90    2.90
   3   7   5   62.05    3.45
   3  -7   5   63.07    3.89
  -3  -7  -5   72.13    3.99
  -3   7  -5   69.51    4.12
   3   7   5   66.46    3.91
  -3   7  -5   67.71    3.62
  -3  -7  -5   61.87    3.78
  -3   7  -6   51.07    3.01
   3  -7   6   56.96    3.20
  -3   7  -6   57.99    3.71
   3   7   6   52.92    2.92
   3   7   6   58.83    3.22
   3   7   6   55.08    2.74
   3   7   6   57.02    3.25
   3  -7   6   51.41    3.55
  -3  -7  -6   59.52    3.66
  -3   7  -6   55.89    3.76
  -3  -7  -6   57.16    3.66
   3   7   6   55.50    3.59
  -3   7  -6   57.14    3.43
  -3   7  -7   29.06    2.36
   3  -7   7   31.26    2.50
   3   7   7   30.05    2.38
   3   7   7   27.44    2.34
  -3   7  -7   32.63    2.87
   3   7   7   27.69    2.08
   3   7   7   29.31    2.09
  -3  -7  -7   30.96    2.69
   3  -7   7   29.57    2.74
   3  -7   7   28.89    1.85
  -3  -7  -7   28.13    2.60
   3   7   7   31.09    2.73
  -3   7  -7   28.06    2.48
   3  -7   8   74.68    3.98
  -3   7  -8   70.12    3.78
   3   7   8   71.00    3.69
   3   7   8   70.88    3.68
   3   7   8   68.45    3.18
   3   7   8   74.50    3.41
  -3  -7  -8   77.60    4.36
   3  -7   8   72.76    4.36
  -3  -7  -8   71.37    4.22
   3  -7   8   66.75    2.69
   3   7   8   71.74    4.26
  -3   7  -8   70.44    3.99
   3  -7   9  125.93    5.33
  -3   7  -9  116.23    5.03
   3   7   9  117.82    4.43
   3   7   9  119.84    4.89
   3   7   9  112.63    3.98
   3   7   9  119.61    4.75
   3   7   9  119.70    5.58
   3  -7   9  118.40    5.66
  -3  -7  -9  119.63    5.54
   3  -7   9  112.49    3.24
  -3   7 -10   18.23    2.06
   3  -7  10   17.08    2.01
   3   7  10   17.87    1.53
   3   7  10   19.21    2.02
   3   7  10   17.98    1.88
   3   7  10   16.89    1.81
   3  -7  10   18.72    2.32
   3   7  10   18.24    2.20
  -3  -7 -10   17.75    2.15
   3  -7  10   19.35    1.23
   3  -7  11  188.31    6.97
   3  -7  11  187.77    3.20
  -3   7 -11  177.76    6.65
   3   7  11  174.66    4.64
   3   7  11  183.40    5.91
   3   7  11  208.54    7.62
   3  -7  11  178.57    7.25
  -3  -7 -11  176.01    7.02
  -3   7 -12   17.66    2.20
   3   7  12   16.10    1.76
   3   7  12   15.48    1.30
   3   7  12   19.58    2.36
   3  -7  12   16.71    2.29
  -3  -7 -12   19.37    2.39
  -3   7 -13   62.30    4.20
   3   7  13   64.13    3.57
   3   7  13   60.33    2.43
   3  -7  13   55.70    4.24
   3   7  13   65.11    4.50
  -3  -7 -13   57.91    4.17
  -3   7 -14   37.44    3.34
   3   7  14   36.26    2.67
   3  -7  14   37.45    3.52
   3   7  14   36.42    3.41
  -3  -7 -14   36.36    3.41
  -3   7 -15   31.95    3.20
   3   7  15   30.08    2.45
   3  -7  15   28.69    3.20
   3   7  15   29.78    3.22
  -3  -7 -15   29.57    3.15
  -3   7 -16  421.40   11.86
   3   7  16  413.95   12.00
   3  -7  16  399.88   11.26
   3  -7  16  403.75   12.09
  -3  -7 -16  418.51   12.07
  -3   7 -17   15.59    2.36
   3  -7  17   16.41    2.57
   3   7  17   18.68    2.69
   3  -7  17   13.19    2.15
  -3  -7 -17   14.51    2.29
  -3   7 -18  189.03    8.37
   3  -7  18  193.92    8.74
   3   7  18  191.74    8.59
   3  -7  18  186.24    8.20
  -3  -7 -18  189.70    8.57
  -3   7 -19  131.19    7.20
   3  -7  19  131.68    7.04
   3   7  19  132.98    7.30
   3  -7  19  137.24    7.49
  -3  -7 -19  138.51    7.48
  -3   7 -20  590.34   15.71
   3   7  20  603.57   15.89
   3  -7  20  599.87   16.08
   3  -7  20  591.85   15.32
  -3  -7 -20  604.27   15.90
  -3   7 -21   26.16    3.41
   3  -7  21   31.65    3.84
   3   7  21   28.76    3.61
   3  -7  21   30.65    3.62
  -3  -7 -21   30.58    3.68
  -3   7 -22   73.59    5.77
   3   7  22   75.14    5.86
   3  -7  22   67.26    5.38
   3  -7  22   78.09    6.07
  -3  -7 -22   73.68    5.79
  -3   7 -23    3.36    1.39
   3  -7  23    2.83    1.18
   3   7  23    2.62    1.16
   3  -7  23    2.71    1.25
  -3  -7 -23    2.04    1.27
  -3   7 -24   67.78    5.79
   3  -7  24   67.80    5.66
  -3   9  26   11.22    2.36
  -3   9  25   15.90    2.81
  -3   9  25   18.77    3.01
   3  -9 -25   14.50    2.57
   3   9 -24  256.06   11.38
  -3   9  24  246.86   10.40
  -3   9  24  237.24   10.29
  -3  -9  24  253.32   11.17
   3  -9 -24  249.29   10.57
   3   9 -23    9.73    2.25
  -3   9  23    9.41    2.11
  -3  -9  23    8.02    1.97
  -3   9  23    9.50    2.18
   3  -9 -23    6.70    1.69
   3   9 -22   74.12    5.88
  -3   9  22   76.25    5.54
  -3  -9  22   77.04    5.98
  -3   9  22   76.88    5.63
   3  -9 -22   77.94    5.66
   3   9 -21   30.59    3.68
  -3   9  21   32.19    3.55
  -3  -9  21   33.88    3.89
  -3   9  21   31.67    3.61
   3  -9 -21   29.63    3.48
   3   9 -20  139.77    7.71
  -3   9  20  135.90    7.11
  -3   9  20  137.40    7.14
  -3  -9  20  146.39    7.95
   3  -9 -20  141.90    7.28
   3   9 -19   -1.23    1.16
  -3   9  19    0.69    0.39
  -3   9  19    0.14    0.40
  -3   9  19    0.32    0.46
  -3   9  19    1.76    0.84
  -3  -9  19    0.84    0.86
   3  -9 -19    0.09    0.65
   3   9 -18   40.46    3.98
  -3   9  18   41.13    3.61
  -3   9  18   42.06    2.99
  -3   9  18   40.08    3.73
  -3  -9  18   46.57    4.31
  -3   9  18   47.62    4.03
   3  -9 -18   41.85    3.78
   3   9 -17   92.63    5.86
  -3   9  17   93.40    5.54
  -3   9  17   93.96    4.29
  -3   9  17   93.86    5.44
  -3   9  17   90.13    5.42
  -3  -9  17   96.41    6.16
   3  -9 -17   93.42    5.54
   3   9 -16   80.08    5.37
  -3   9  16   77.69    5.00
  -3   9  16   79.61    5.00
  -3   9  16   79.61    3.82
  -3   9  16   79.75    5.01
  -3  -9  16   77.14    5.38
   3  -9 -16   74.50    4.89
  -3   9  15    5.52    0.99
   3   9 -15    6.32    1.50
  -3   9  15    6.16    1.39
  -3   9  15    6.26    1.02
  -3   9  15    6.51    1.48
  -3  -9  15    5.68    1.41
  -3   9  15    7.92    1.55
   3  -9 -15    6.88    1.51
   3   9 -14  106.29    5.93
  -3   9  14  102.18    4.05
  -3   9  14  107.21    5.63
  -3   9  14  107.02    4.15
  -3   9  14  109.50    5.74
  -3  -9  14  104.69    6.12
   3  -9 -14  103.09    5.56
   3   9 -13   89.81    5.33
  -3   9  13   98.47    3.84
  -3   9  13   93.35    4.45
  -3   9  13   98.31    5.44
  -3   9  13   97.16    5.24
  -3   9  13  100.17    3.89
  -3  -9  13   91.41    5.61
   3  -9 -13   95.97    5.21
  -3   9  12  231.94    5.65
   3   9 -12  228.26    8.34
  -3   9  12  237.68    8.32
  -3   9  12  219.70    6.90
  -3   9  12  241.95    5.91
  -3   9  12  226.98    7.88
  -3  -9  12  233.21    8.90
   3  -9 -12  226.54    7.85
   3   9 -11   81.61    4.86
  -3   9  11   88.16    3.47
  -3   9  11   84.97    3.29
  -3   9  11   82.18    4.66
  -3   9  11   83.28    4.31
  -3   9  11   80.06    4.82
  -3  -9  11   79.43    5.17
   3  -9 -11   79.71    4.61
  -3   9  10   17.31    1.48
   3   9 -10   15.80    2.11
  -3   9  10   17.58    2.01
  -3   9  10   18.91    2.39
  -3  -9  10   18.79    2.48
   3  -9 -10   18.24    2.15
   3  -9 -10   17.84    2.16
  -3   9   9   55.15    2.60
   3   9  -9   51.46    3.75
  -3   9   9   50.88    3.84
  -3   9   9   50.83    3.47
   3  -9  -9   49.08    3.41
  -3  -9   9   45.55    3.87
  -3   9   9   51.65    3.55
   3  -9  -9   48.75    3.47
  -3   9   8  119.61    3.75
   3   9  -8  109.39    5.33
  -3  -9   8  121.42    5.59
  -3   9   8  110.01    5.15
  -3   9   8  118.70    5.84
  -3  -9   8  107.74    5.88
   3  -9  -8  112.17    5.07
  -3   9   8  114.56    5.21
   3  -9  -8  109.11    5.14
  -3   9   7    4.56    0.69
   3   9  -7    4.13    0.99
  -3  -9   7    5.21    1.16
  -3   9   7    4.89    1.30
  -3   9   7    4.22    1.04
  -3  -9   7    3.54    1.06
   3  -9  -7    4.80    1.04
   3  -9  -7    4.13    0.99
  -3   9   7    4.59    0.99
  -3  -9   6  304.46    8.51
  -3   9   6  309.81    5.95
   3   9  -6  299.37    8.50
  -3   9   6  303.54    9.27
   3  -9  -6  297.91    8.00
  -3  -9   6  288.04    9.41
   3  -9  -6  292.14    8.22
  -3   9   6  294.04    8.15
   3  -9  -6  295.59    9.31
  -3   9   5   96.60    3.33
   3   9  -5   89.23    4.57
  -3   9   5   92.77    5.12
  -3  -9   5   91.36    4.66
   3  -9  -5   93.08    4.47
  -3   9   5   92.19    4.54
  -3  -9   5   89.14    5.17
   3  -9  -5   94.19    4.63
   3  -9  -5   88.75    5.08
  -3   9   4  277.35    5.66
   3   9  -4  270.47    7.88
  -3  -9   4  259.88    6.91
   3  -9  -4  265.07    7.93
  -3  -9   4  272.51    7.78
  -3   9   4  274.27    8.83
   3  -9  -4  260.46    7.44
  -3  -9   4  269.61    9.01
  -3   9   4  259.47    7.58
   3  -9  -4  267.99    7.76
   3  -9  -4  258.77    8.64
  -3   9   3    8.95    1.00
   3   9  -3    9.22    1.39
  -3   9   3    9.15    1.62
  -3  -9   3    8.11    1.20
   3  -9  -3    6.37    1.18
  -3  -9   3    9.39    1.44
   3  -9  -3    6.44    1.16
  -3  -9   3    8.39    1.62
  -3  -9   3    6.09    1.11
   3  -9  -3    8.29    1.51
   3  -9  -3    6.42    1.11
  -3   9   3    5.95    1.13
   3   9  -2  253.32    7.42
  -3   9   2  253.72    5.70
   3  -9  -2  248.85    7.74
  -3   9   2  269.15    8.73
   3  -9  -2  253.11    5.52
  -3  -9   2  253.00    7.28
  -3  -9   2  238.31    6.47
   3  -9  -2  301.57    7.88
   3  -9  -2  244.98    7.42
  -3   9   2  257.68    7.46
   3  -9  -2  253.67    8.50
  -3  -9   2  247.67    8.23
  -3  -9   2  250.06    8.67
   3   9  -1   58.35    3.55
  -3   9   1   59.32    2.80
  -3   9   1   57.58    4.03
  -3  -9   1   57.07    3.40
   3  -9  -1   54.89    3.64
  -3  -9   1   54.22    3.04
   3   9  -1   57.62    3.99
   3  -9  -1   53.36    2.66
   3  -9  -1   54.26    3.36
  -3   9   1   53.25    3.40
  -3  -9   1   56.47    4.15
   3  -9  -1   54.80    3.98
  -3  -9   1   58.25    3.98
  -3   9   0  862.02   11.08
   3   9   0  902.71   13.85
  -3  -9   0  823.37   11.72
   3  -9   0  830.79   14.25
   3  -9   0  846.57   10.87
   3   9   0  879.02   15.46
  -3  -9   0  843.69   13.04
  -3   9   0  866.95   15.80
   3  -9   0  825.09   15.41
  -3  -9   0  858.38   16.13
  -3  -9   0  826.62   15.13
  -3   9   0  830.07   13.56
   3  -9   1   -1.00    0.84
   3   9   1   -0.62    0.70
  -3   9  -1   -0.04    0.63
   3  -9   1   -0.09    0.46
  -3   9  -1   -0.14    0.46
   3   9   1   -0.74    0.63
   3  -9   1    0.72    0.49
  -3  -9  -1   -0.46    0.79
  -3   9  -1   -0.35    0.65
  -3  -9  -1    0.60    0.51
   3   9   2  547.94   10.70
  -3   9  -2  540.29    9.38
   3  -9   2  528.78    9.32
  -3   9  -2  545.09   12.67
   3  -9   2  517.75   11.44
   3   9   2  531.81   11.47
   3   9   2  551.55   12.10
   3  -9   2  516.66   12.31
  -3   9  -2  532.95   11.05
  -3  -9  -2  535.52   12.21
   3  -9   3   41.43    2.71
   3   9   3   43.95    3.03
  -3   9  -3   42.35    2.73
   3   9   3   39.27    3.10
   3   9   3   46.11    3.50
  -3   9  -3   45.41    3.64
   3  -9   3   39.74    3.45
  -3   9  -3   40.43    3.08
  -3  -9  -3   39.04    3.34
  -3   9  -4  449.35    9.13
   3  -9   4  441.63    9.18
   3   9   4  457.97    9.82
   3   9   4  456.78   10.43
  -3   9  -4  465.82   11.82
   3   9   4  502.29   11.49
   3  -9   4  440.26   11.54
  -3   9  -4  455.05   10.52
  -3  -9  -4  443.16   11.24
   3   9   5   60.41    3.59
   3  -9   5   55.63    3.40
  -3   9  -5   55.14    3.33
  -3   9  -5   57.39    4.19
   3   9   5   54.57    3.78
   3   9   5   56.82    3.66
   3  -9   5   56.81    4.19
  -3  -9  -5   55.89    4.05
  -3   9  -5   57.88    3.84
   3   9   6   85.96    4.33
  -3   9  -6   89.14    4.35
   3  -9   6   88.63    4.40
   3   9   6   86.87    4.77
   3   9   6   85.15    4.38
  -3   9  -6   89.62    5.21
   3  -9   6   80.01    5.05
  -3  -9  -6   86.12    5.08
   3  -9   7  109.74    5.05
  -3   9  -7  104.25    4.84
   3   9   7  103.15    4.79
   3   9   7  101.72    4.70
  -3   9  -7  102.88    5.70
   3   9   7  102.25    5.15
   3  -9   7  103.67    5.82
  -3  -9  -7  104.73    5.63
   3  -9   7   98.33    4.17
  -3   9  -8   17.38    2.09
   3  -9   8   15.32    1.97
   3   9   8   15.66    1.83
   3   9   8   16.31    1.95
  -3   9  -8   14.06    2.11
   3   9   8   16.03    1.97
   3  -9   8   14.39    2.16
   3  -9   8   14.51    1.57
  -3  -9  -8   16.03    2.20
   3  -9   9   12.05    1.83
  -3   9  -9   10.22    1.58
   3   9   9   11.38    1.64
   3   9   9   11.66    1.50
   3   9   9   12.07    1.79
   3   9   9    8.67    1.27
   3  -9   9   11.88    2.09
  -3  -9  -9   12.03    2.02
   3  -9   9   11.66    1.34
  -3   9 -10   23.70    2.53
   3   9  10   28.57    2.66
   3   9  10   22.84    2.11
   3   9  10   26.00    2.32
   3   9  10   28.85    2.76
   3  -9  10   21.92    2.80
  -3  -9 -10   24.01    2.81
   3  -9  10   25.03    1.83
  -3   9 -11    5.33    1.23
   3  -9  11    5.49    0.77
   3   9  11    4.82    1.13
   3   9  11    4.96    0.95
   3   9  11    4.77    1.04
   3   9  11    3.84    1.04
   3  -9  11    5.31    1.41
  -3  -9 -11    4.89    1.32
  -3   9 -12   45.46    3.71
   3   9  12   39.78    2.64
   3   9  12   44.81    3.41
   3   9  12   44.02    3.18
   3   9  12   41.06    3.24
   3  -9  12   44.32    4.06
  -3  -9 -12   42.68    3.87
  -3   9 -13    0.39    0.62
   3   9  13    1.48    0.56
   3   9  13    1.25    0.63
   3   9  13    2.43    0.84
   3  -9  13    1.28    0.70
  -3  -9 -13    0.63    0.55
  -3   9 -14  307.71   10.15
   3   9  14  316.79    9.39
   3   9  14  326.18    9.13
   3   9  14  320.47    9.13
   3   9  14  316.93   10.82
   3  -9  14  321.59   11.26
  -3  -9 -14  310.83   10.82
  -3   9 -15    0.90    0.70
   3   9  15    0.42    0.48
   3   9  15    0.44    0.72
   3   9  15    1.16    0.79
   3   9  15    1.51    0.99
   3  -9  15    1.76    1.20
  -3  -9 -15    1.27    0.81
  -3   9 -16  317.86   10.87
   3   9  16  329.12    9.68
   3   9  16  328.35    9.22
   3   9  16  331.02   10.01
   3   9  16  329.39   11.47
   3  -9  16  329.14   11.82
  -3  -9 -16  319.92   11.36
  -3   9 -17   35.17    3.69
   3   9  17   33.14    2.97
   3   9  17   33.07    3.29
   3   9  17   34.06    3.17
   3   9  17   32.56    3.68
   3  -9  17   41.10    4.28
  -3  -9 -17   35.31    3.84
  -3   9 -18  215.84    9.46
   3   9  18  211.92    8.43
   3   9  18  219.63    8.30
   3   9  18  217.37    9.69
   3  -9  18  210.06    9.18
   3  -9  18  226.26   10.15
  -3  -9 -18  231.03   10.08
  -3   9 -19   41.45    4.24
   3   9  19   42.45    3.84
   3   9  19   46.11    3.92
   3   9  19   43.84    4.49
   3  -9  19   45.00    4.61
   3  -9  19   44.40    4.36
  -3  -9 -19   44.33    4.50
  -3   9 -20  144.31    8.09
   3   9  20  144.56    7.04
   3   9  20  148.89    8.37
   3  -9  20  135.99    8.15
   3  -9  20  136.47    7.76
  -3  -9 -20  144.52    8.23
  -3   9 -21    4.47    1.39
   3   9  21    5.00    1.32
   3   9  21    4.71    1.46
   3  -9  21    4.01    1.23
  -3  -9 -21    7.20    1.88
  -3   9 -22   23.87    3.41
   3  -9  22   21.11    3.11
  -3  11  23    1.94    0.83
  -3  11  22   57.81    5.08
   3 -11 -22   61.84    5.38
  -3  11  21   12.17    2.30
   3  11 -21   13.18    2.46
   3 -11 -21   11.56    2.25
  -3  11  20   46.29    4.36
  -3  11  20   48.80    4.43
   3  11 -20   44.32    4.68
   3 -11 -20   44.16    4.35
   3  11 -19    2.96    1.20
  -3  11  19    3.94    1.53
  -3  11  19    3.43    1.34
  -3 -11  19    4.26    1.55
   3 -11 -19    4.49    1.30
   3  11 -18  273.55   11.05
  -3  11  18  273.32   10.26
  -3  11  18  275.11   10.41
  -3 -11  18  293.92   11.93
   3 -11 -18  276.57   10.59
   3  11 -17    8.67    2.06
  -3  11  17    7.28    1.67
  -3  11  17    7.27    1.78
  -3 -11  17    7.76    1.83
   3 -11 -17    8.97    1.99
   3  11 -16  129.78    7.27
  -3  11  16  134.60    7.21
  -3  11  16  121.02    6.58
  -3 -11  16  135.60    7.88
   3 -11 -16  124.15    6.90
   3  11 -15    0.05    0.65
  -3  11  15   -0.48    0.91
  -3  11  15    0.39    0.60
  -3 -11  15    1.39    1.20
   3 -11 -15    1.20    0.81
   3  11 -14   87.05    5.74
  -3  11  14   91.55    5.86
  -3 -11  14   89.46    6.28
   3 -11 -14   84.34    5.52
   3  11 -13   -0.32    0.93
  -3  11  13    0.86    0.65
  -3 -11  13   -1.69    1.20
   3 -11 -13   -0.30    0.60
   3  11 -12    9.41    1.86
  -3  11  12   10.03    1.88
  -3 -11  12    9.94    2.15
   3 -11 -12   12.07    2.06
   3  11 -11   17.98    2.48
  -3  11  11   20.11    2.78
  -3 -11  11   17.42    2.74
   3 -11 -11   16.71    2.30
   3  11 -10   -0.09    0.90
  -3  11  10    1.23    0.72
  -3 -11  10   -0.23    0.74
  -3  11   9   57.16    2.83
   3  11  -9   48.54    3.94
  -3  11   9   54.68    4.47
  -3 -11   9   47.46    4.42
   3 -11  -9   50.67    4.40
   3 -11  -9   49.86    3.94
  -3  11   8   35.26    2.22
   3  11  -8   27.90    2.94
  -3  11   8   26.97    3.10
  -3 -11   8   30.54    3.54
   3 -11  -8   29.15    2.99
   3 -11  -8   29.41    3.38
   3  11  -7    0.99    0.56
  -3  11   7   -0.37    0.37
  -3  11   7    1.18    0.88
  -3 -11   7    0.09    0.58
   3 -11  -7    0.02    0.63
   3 -11  -7    0.40    0.70
  -3  11   6  127.53    4.17
   3  11  -6  115.27    5.84
  -3 -11   6  112.93    5.37
  -3  11   6  128.20    6.79
  -3 -11   6  111.52    6.58
   3 -11  -6  119.21    6.63
   3 -11  -6  118.94    5.95
   3  11  -5   39.41    3.31
  -3  11   5   40.11    2.39
  -3  11   5   39.81    3.78
  -3 -11   5   33.85    2.89
  -3 -11   5   34.55    3.64
   3 -11  -5   33.81    3.11
   3 -11  -5   35.80    3.64
  -3  11   4  308.93   10.56
   3  11  -4  300.04   10.47
  -3 -11   4  275.25    8.06
   3  11  -4  296.58    9.01
  -3  11   4  310.51    6.69
   3 -11  -4  286.04   10.29
   3 -11  -4  286.13    9.18
  -3 -11   4  296.65   10.68
  -3  11   3    4.24    1.25
   3  11  -3    3.87    1.46
  -3 -11   3    2.57    0.76
   3  11  -3    3.43    1.09
  -3  11   3    2.83    0.60
  -3 -11   3    3.29    1.13
   3 -11  -3    2.85    1.06
   3 -11  -3    2.22    0.44
  -3 -11   2  432.59    9.83
  -3  11   2  474.21   13.21
   3  11  -2  502.53   13.46
  -3  11   2  485.79    8.74
   3  11  -2  479.08   11.26
  -3 -11   2  455.37   13.32
   3 -11  -2  465.73   13.11
   3  11  -1    8.23    1.85
  -3 -11   1    7.11    1.30
   3 -11  -1    9.11    1.23
  -3 -11   1    6.72    1.20
  -3  11   1   10.70    2.04
   3  11  -1    8.60    1.48
  -3  11   1    8.30    1.11
  -3 -11   1    8.16    1.78
   3 -11  -1    7.20    1.55
  -3 -11   1    6.72    1.43
  -3  11   0  236.90    6.49
   3  11   0  241.19    7.88
   3 -11   0  229.34    6.25
   3  11   0  245.24    9.29
  -3  11   0  232.68    9.31
   3 -11   0  237.94    9.38
  -3 -11   0  238.96    9.61
  -3 -11   0  231.99    8.95
   3  11   1   24.88    2.55
  -3  11  -1   24.95    2.15
   3  11   1   26.67    3.01
   3 -11   1   23.54    2.08
  -3  11  -1   23.01    2.96
   3 -11   1   24.14    3.01
  -3 -11  -1   22.48    2.74
  -3 -11  -1   21.81    2.90
  -3  11  -2  264.12    7.20
   3  11   2  259.49    8.15
  -3  11  -2  259.76    9.92
   3 -11   2  251.77    6.98
   3  11   2  253.28    9.36
   3 -11   2  239.05    9.45
  -3 -11  -2  249.67    9.89
  -3 -11  -2  240.77    9.18
  -3  11  -3    2.53    0.67
   3  11   3    2.48    0.81
   3  11   3    1.30    0.62
   3 -11   3    2.23    0.72
  -3  11  -3    1.20    0.63
   3 -11   3    3.03    1.27
  -3 -11  -3    3.17    1.23
  -3 -11  -3    1.28    0.67
   3 -11   4   52.97    3.43
   3  11   4   53.82    3.69
  -3  11  -4   51.95    3.41
   3  11   4   54.48    4.24
  -3  11  -4   47.82    4.26
   3 -11   4   53.64    4.56
  -3 -11  -4   52.48    4.33
  -3 -11  -4   57.05    4.80
   3 -11   5   11.89    1.72
  -3  11  -5   10.94    1.60
   3  11   5   10.66    1.65
   3  11   5    9.68    1.65
  -3  11  -5    9.76    1.92
   3 -11   5   10.36    2.08
  -3 -11  -5   11.49    2.02
  -3  11  -6   84.16    4.57
   3  11   6   96.32    5.00
   3  11   6   83.35    5.38
  -3  11  -6   91.09    6.03
   3 -11   6   75.79    5.51
  -3 -11  -6   80.94    5.51
  -3  11  -7   22.43    2.45
   3  11   7   21.81    2.41
  -3  11  -7   23.52    3.08
   3  11   7   23.24    2.80
   3 -11   7   21.99    2.96
  -3 -11  -7   20.90    2.81
   3  11   8   34.24    3.06
  -3  11  -8   33.37    3.03
  -3  11  -8   30.86    3.43
   3  11   8   32.34    3.29
   3 -11   8   34.32    3.82
  -3 -11  -8   35.31    3.76
   3  11   9   41.11    3.40
  -3  11  -9   39.48    3.40
   3  11   9   39.53    3.71
  -3  11  -9   40.06    4.03
   3 -11   9   37.84    4.01
  -3 -11  -9   33.71    3.64
   3  11  10    5.03    1.27
  -3  11 -10    3.87    1.11
  -3  11 -10    3.59    1.44
   3  11  10    5.08    1.37
   3 -11  10    4.79    1.39
  -3 -11 -10    4.59    1.44
  -3  11 -11   13.09    2.04
   3  11  11   16.80    2.18
   3  11  11   14.32    2.18
  -3  11 -11   15.11    2.53
   3 -11  11   14.60    2.53
  -3 -11 -11   13.21    2.36
   3  11  12   71.64    4.56
  -3  11 -12   68.14    4.82
   3  11  12   66.34    4.71
  -3  11 -12   68.89    5.44
   3 -11  12   68.14    5.56
  -3 -11 -12   70.90    5.51
  -3  11 -13    2.20    0.91
   3  11  13    1.69    0.70
  -3  11 -13    2.71    1.14
   3  11  13    1.86    0.95
   3 -11  13    0.35    0.49
  -3 -11 -13    2.64    1.25
  -3  11 -14  181.50    8.30
   3  11  14  176.91    7.72
  -3  11 -14  190.88    9.15
   3  11  14  189.60    7.62
   3 -11  14  190.77    9.48
  -3 -11 -14  173.62    8.87
  -3  11 -15    1.64    1.02
   3  11  15    1.86    0.91
  -3  11 -15    2.02    1.04
   3  11  15    1.58    0.74
   3 -11  15    3.66    1.44
  -3 -11 -15    1.23    0.93
  -3  11 -16   64.85    5.38
   3  11  16   65.15    4.71
  -3  11 -16   61.64    5.01
  -3 -11 -16   63.65    5.42
  -3  11 -17   17.50    2.99
  -3  11 -17   14.64    2.48
  -3 -11 -17   14.20    2.64
  -3  11 -18  153.88    8.37
  -3  11 -18  167.29    8.81
  -3  11 -19   11.70    2.34
  -3  11 -19   13.09    2.48
   3 -11  19   13.76    2.48
   3 -13 -18   69.19    5.77
  -3  13  17    1.69    1.23
   3  13 -17    2.52    0.97
   3 -13 -17    2.57    1.32
  -3  13  16   48.31    4.82
   3  13 -16   43.77    4.45
   3 -13 -16   45.83    4.56
  -3  13  15   11.17    2.43
   3  13 -15    9.68    2.23
   3 -13 -15    6.54    1.92
  -3  13  14   28.52    3.64
   3  13 -14   31.10    3.69
   3 -13 -14   23.86    3.50
   3 -13 -14   25.98    3.43
  -3  13  13   31.10    3.76
   3  13 -13   27.23    3.40
   3 -13 -13   31.91    3.76
   3 -13 -13   31.90    3.98
  -3  13  12   33.69    4.01
   3  13 -12   29.94    3.47
   3 -13 -12   31.00    3.99
   3 -13 -12   30.15    3.57
   3  13 -11   31.24    3.55
  -3  13  11   32.07    3.85
  -3 -13  11   36.49    4.33
   3 -13 -11   37.40    4.31
   3 -13 -11   26.46    3.22
   3  13 -10    4.26    1.35
  -3  13  10    3.69    1.20
  -3 -13  10    5.17    1.60
   3 -13 -10    5.66    1.67
   3 -13 -10    4.94    1.44
   3  13  -9    1.86    0.81
   3  13  -9    1.90    1.25
  -3  13   9    2.67    1.16
  -3 -13   9    0.16    0.86
   3 -13  -9    2.30    1.20
   3 -13  -9    0.60    0.48
   3  13  -8   68.45    4.98
   3  13  -8   74.77    6.00
  -3  13   8   74.86    5.88
  -3 -13   8   68.12    5.84
   3 -13  -8   74.91    6.05
   3 -13  -8   58.90    4.79
   3  13  -7    4.73    1.30
  -3  13   7    5.61    1.60
   3  13  -7    7.74    1.95
  -3 -13   7    5.28    1.71
   3 -13  -7    5.51    1.71
   3 -13  -7    5.17    1.35
   3  13  -6  101.02    5.89
  -3  13   6  105.82    6.95
   3  13  -6  102.81    6.97
  -3 -13   6   95.30    6.83
   3 -13  -6   98.68    6.09
   3 -13  -6   97.43    6.77
   3  13  -5   34.48    3.38
  -3  13   5   34.27    3.94
   3  13  -5   34.96    4.15
  -3 -13   5   33.90    4.06
   3 -13  -5   33.09    3.94
   3 -13  -5   28.73    3.33
   3  13  -4   55.29    4.24
  -3  13   4   59.80    5.19
   3  13  -4   60.11    5.24
  -3 -13   4   52.39    4.98
   3 -13  -4   53.38    5.00
   3  13  -3   -0.42    0.86
  -3  13   3   -0.46    0.77
   3  13  -3   -0.32    0.63
   3 -13  -3   -1.13    1.30
  -3 -13   3   -1.48    1.35
   3  13  -2   50.02    3.98
  -3  13   2   57.09    5.14
   3  13  -2   54.29    4.94
   3 -13  -2   48.43    4.77
  -3 -13   2   43.98    4.64
   3  13  -1    2.02    1.20
  -3  13   1   -0.05    0.99
   3  13  -1    1.64    0.72
   3 -13  -1    1.37    0.79
  -3 -13   1    0.83    0.83
   3  13   0   92.27    5.30
   3  13   0   91.64    6.40
  -3  13   0   92.40    6.53
   3 -13   0   88.02    6.53
  -3 -13   0   77.16    5.84
  -3 -13   0   87.01    6.46
   3  13   1   58.48    4.24
  -3  13  -1   58.95    5.23
   3  13   1   56.17    4.98
   3 -13   1   54.70    5.10
  -3 -13  -1   54.27    5.21
  -3 -13  -1   50.10    4.71
   3  13   2  140.49    6.51
   3  13   2  142.24    7.92
  -3  13  -2  143.03    8.13
   3 -13   2  135.25    8.00
  -3 -13  -2  136.69    8.20
  -3 -13  -2  127.95    7.48
   3  13   3    5.08    1.09
  -3  13  -3    5.38    1.76
   3  13   3    8.16    2.01
   3 -13   3    5.63    1.74
  -3 -13  -3    3.55    1.23
  -3 -13  -3    7.13    2.01
   3  13   4   82.39    6.00
  -3  13  -4   89.02    6.54
   3 -13   4   84.41    6.35
  -3 -13  -4   86.26    6.56
  -3 -13  -4   82.09    6.00
  -3  13  -5   -0.05    0.74
   3  13   5    3.80    1.46
   3 -13   5    1.20    0.79
  -3 -13  -5    1.25    0.95
  -3 -13  -5    3.29    1.48
  -3  13  -6   48.71    4.80
   3  13   6   51.63    4.66
   3 -13   6   45.72    4.75
  -3 -13  -6   47.82    4.89
  -3 -13  -6   48.61    4.71
  -3  13  -7    2.96    0.86
   3  13   7    3.27    1.09
   3 -13   7    4.19    1.46
  -3 -13  -7    4.77    1.58
  -3 -13  -7    3.52    1.18
   3  13   8   -0.19    1.25
  -3  13  -8   -1.55    1.69
   3 -13   8    2.73    1.53
  -3 -13  -8    1.27    0.90
   3  13   9   18.98    2.83
  -3 -13  -9   15.04    2.67
   3  13  10    0.93    0.62
  -3 -13 -10    2.39    1.00
   3  13  11   16.64    2.78
  -3 -13 -11   12.26    2.48
   3  13  12    3.15    1.20
  -3 -13 -12    3.78    1.53
   3  13  13    0.56    0.86
   3  13  14   23.22    3.18
  -4   0  30  171.77    8.99
   4   0 -30  173.11    8.97
  -4   0  29    2.13    1.25
   4   0 -29    3.17    1.50
   4   0 -28  489.74   14.27
  -4   0  28  525.09   14.87
   4   0 -28  518.60   14.81
   4   0 -27   -0.18    0.62
  -4   0  27    1.97    1.13
   4   0 -27    3.96    1.48
   4   0 -26  269.77    9.98
  -4   0  26  271.96   10.10
   4   0 -26  270.10   10.03
   4   0 -25    3.03    1.13
   4   0 -25    1.57    1.35
  -4   0  25    1.97    1.23
   4   0 -25    0.53    1.30
   4   0 -24 1206.85   14.53
   4   0 -24 1224.01   20.06
  -4   0  24 1223.66   20.27
   4   0 -24 1220.91   20.06
   4   0 -23    1.44    1.02
   4   0 -23   -0.09    0.49
  -4   0  23    2.29    1.28
   4   0 -23    2.13    1.07
   4   0 -22  166.83    5.23
   4   0 -22  174.03    7.14
  -4   0  22  173.60    7.18
   4   0 -22  167.69    7.02
   4   0 -21    0.16    0.28
   4   0 -21    0.26    0.49
  -4   0  21   -0.84    0.74
   4   0 -21   -0.48    0.53
   4   0 -20    9.20    1.60
   4   0 -20    9.15    1.16
  -4   0  20   11.38    1.79
   4   0 -20   10.57    1.58
   4   0 -20   12.30    1.76
   4   0 -19    0.32    0.33
  -4   0  19    0.30    0.62
   4   0 -19    0.44    0.37
  -4   0  19    0.58    0.76
   4   0 -19    0.14    0.33
   4   0 -19    0.14    0.33
   4   0 -18   81.65    3.36
   4   0 -18   87.21    4.43
  -4   0  18   92.45    4.68
  -4   0  18   83.28    4.38
   4   0 -18   87.68    4.20
   4   0 -18   87.65    4.40
  -4   0  17   -0.04    0.35
   4   0 -17    0.25    0.23
   4   0 -17    1.07    0.63
   4   0 -17    0.49    0.42
  -4   0  17    1.02    0.51
   4   0 -17   -0.53    0.44
  -4   0  16  334.24    8.25
   4   0 -16  327.91    8.04
   4   0 -16  326.18    6.37
   4   0 -16  334.17    7.55
  -4   0  16  342.76    8.18
   4   0 -15    0.56    0.42
  -4   0  15   -0.25    0.30
   4   0 -15   -0.11    0.25
   4   0 -14 1513.69   15.99
  -4   0  14 1568.98   16.41
   4   0 -14 1449.47   12.74
  -4   0  14 1532.23   16.08
   4   0 -14 1553.22   14.67
   4   0 -13    0.53    0.49
  -4   0  13    0.58    0.28
   4   0 -13    0.40    0.46
  -4   0  13   -0.30    0.42
  -4   0  12 1013.28   12.00
   4   0 -12 1024.63   11.89
   4   0 -12 1010.57    9.98
  -4   0  12  988.72   11.77
   4   0 -12  998.52   10.57
  -4   0  12  997.92   10.12
   4   0 -11    0.35    0.23
   4   0 -11    0.09    0.39
  -4   0  11    0.28    0.28
   4   0 -11    1.48    0.51
  -4   0  11   -0.21    0.49
  -4   0  11    0.04    0.28
   4   0 -10  469.07    7.30
   4   0 -10  464.46    6.40
  -4   0  10  472.19    7.35
  -4   0  10  465.22    7.23
   4   0 -10  461.65    6.28
  -4   0  10  461.70    6.40
  -4   0   9    0.67    0.37
  -4   0   9    0.84    0.39
   4   0  -9    0.51    0.32
   4   0  -9    0.88    0.37
   4   0  -9    0.72    0.26
  -4   0   8 6177.12   23.63
   4   0  -8 6345.80   21.94
  -4   0   8 6395.66   22.24
   4   0  -8 6292.78   23.77
   4   0  -8 6186.20   19.44
   4   0  -7    0.53    0.33
  -4   0   7    0.90    0.40
   4   0  -7    3.99    0.53
  -4   0   7    0.70    0.37
   4   0  -7    0.53    0.19
  -4   0   7    0.40    0.23
  -4   0   6  904.35    7.86
  -4   0   6  923.98    7.85
   4   0  -6  917.40    7.79
   4   0  -6  923.01    7.86
  -4   0   6  871.75    5.56
   4   0  -6  873.61    5.63
   4   0  -5    0.81    0.35
  -4   0   5    0.23    0.21
  -4   0   5   -0.40    0.33
   4   0  -5    0.05    0.19
   4   0  -5    0.70    0.16
  -4   0   5    0.11    0.11
   4   0  -4 9674.17   23.80
   4   0  -4 9454.05   22.13
  -4   0   3    0.70    0.23
   4   0  -3    0.69    0.30
  -4   0   3    0.26    0.25
   4   0  -3    1.50    0.37
   4   0  -3    0.72    0.21
   4   0  -2   17.54    0.90
  -4   0   2   17.22    0.84
  -4   0   2   15.90    0.88
   4   0  -2   17.52    0.84
  -4   0   2   16.91    0.99
   4   0  -2   16.89    0.69
  -4   0   2   16.41    0.69
   4   0  -1    1.02    0.21
  -4   0   1    1.81    0.30
  -4   0   1    1.62    0.26
   4   0  -1    4.06    0.37
   4   0   0   63.53    1.35
   4   0   0   64.83    1.64
  -4   0   0   61.28    1.57
   4   0   0   64.49    1.60
  -4   0   0   65.37    1.60
   4   0   1    1.34    0.33
  -4   0  -1    0.58    0.21
   4   0   1    1.09    0.26
  -4   0  -1    0.65    0.25
  -4   0  -2 1097.32    8.16
  -4   0  -2 1111.75    8.62
   4   0   2 1114.39    8.23
  -4   0  -2 1120.77    8.27
   4   0   2 1073.84    8.20
  -4   0  -3    0.14    0.26
  -4   0  -3    0.19    0.25
   4   0   3    0.07    0.26
   4   0   3   -0.18    0.23
  -4   0  -3    0.35    0.26
   4   0   4 1007.02    6.95
  -4   0  -4 1005.21    9.68
  -4   0  -4 1003.25    9.20
   4   0   4 1013.46    9.29
  -4   0  -4 1007.41    9.32
   4   0   4 1000.88    9.17
   4   0   5    0.14    0.21
   4   0   5    0.39    0.19
   4   0   5    0.49    0.44
  -4   0  -5    0.53    0.35
  -4   0  -5    0.81    0.39
   4   0   5   -0.05    0.25
  -4   0  -5    1.69    0.49
   4   0   6  312.52    6.18
   4   0   6  301.96    3.92
  -4   0  -6  317.30    6.16
  -4   0  -6  310.40    5.93
   4   0   6  328.61    6.03
  -4   0  -6  323.14    5.98
   4   0   7    0.88    0.42
   4   0   7    0.07    0.18
  -4   0  -7   -0.19    0.32
  -4   0  -7    0.32    0.25
   4   0   7   -0.18    0.28
   4   0   8 6828.26   32.07
  -4   0  -8 6962.04   31.16
  -4   0  -8 6890.01   32.26
   4   0   8 7039.94   31.03
  -4   0  -8 7165.48   31.37
   4   0   9   -0.51    0.40
  -4   0  -9    0.63    0.40
  -4   0  -9    0.42    0.46
   4   0  10 1097.34   14.09
  -4   0 -10 1120.98   13.79
  -4   0 -10 1120.05   14.09
   4   0  10 1096.97   13.56
  -4   0 -10 1140.69   13.78
   4   0  11    0.44    0.33
   4   0  11    6.18    1.46
  -4   0 -11    0.83    0.32
  -4   0 -11    0.04    0.39
  -4   0 -11    7.67    1.57
   4   0  12 2327.77   22.20
  -4   0 -12 2311.37   21.45
  -4   0 -12 2298.74   21.73
   4   0  12 2261.20   21.01
  -4   0 -12 2258.56   21.06
   4   0  13    0.23    0.40
  -4   0 -13   -0.62    0.49
  -4   0 -13    0.77    0.77
  -4   0 -13    1.48    1.11
   4   0  14  388.11    9.71
   4   0  14  372.56    9.22
  -4   0 -14  398.60    9.62
  -4   0 -14  393.05    9.61
  -4   0 -14  368.57    9.20
   4   0  15    1.43    0.88
  -4   0 -15    1.27    1.00
   4   0  16  740.98   13.88
  -4   0 -16  749.82   14.04
   4   0  17    0.19    0.62
  -4   0 -17    0.72    0.67
   4   0  18   62.89    4.28
  -4   0 -18   60.52    4.24
  -4   0 -18   56.07    2.71
  -4   0 -19    0.48    0.28
   4   0  19   -0.11    0.55
  -4   0 -19    1.30    1.02
  -4   0 -19    0.04    0.32
  -4   0 -20   74.05    2.90
   4   0  20   70.14    4.86
  -4   0 -20   72.18    4.94
  -4   0 -20   73.26    3.13
   4   0  21    0.11    0.60
  -4   0 -21   -0.69    0.99
   4   0  22   19.07    2.73
  -4   0 -22   16.54    2.55
   4   0  23    1.43    0.76
  -4   0 -23   -1.53    0.95
   4   0  24   58.39    5.00
  -4   0 -24   59.52    5.08
   4   0  25   -1.46    1.13
  -4   0 -25    0.44    0.70
   4   0  26    1.16    1.00
  -4   0 -26    5.21    1.72
   4   2 -30  200.03    9.82
  -4   2  30  189.72    9.45
  -4  -2  30  189.82    9.57
   4  -2 -30  198.53    9.66
   4   2 -30  199.61    9.73
   4   2 -29   66.31    5.59
  -4  -2  29   66.89    5.54
  -4   2  29   68.86    5.56
   4  -2 -29   67.38    5.54
   4   2 -29   66.75    5.49
   4   2 -28  374.64   12.90
  -4  -2  28  391.30   13.04
  -4   2  28  388.41   12.74
   4   2 -28  376.36   12.79
   4  -2 -28  378.21   12.56
   4   2 -27   23.66    3.17
  -4  -2  27   22.25    3.04
  -4   2  27   27.25    3.43
   4   2 -27   23.66    3.20
   4  -2 -27   29.20    3.52
   4   2 -26  604.61   15.52
  -4  -2  26  599.64   15.27
  -4   2  26  612.89   15.13
   4  -2 -26  594.47   14.92
   4   2 -26  593.15   15.13
   4   2 -25   58.04    4.66
   4  -2 -25   62.88    4.01
  -4  -2  25   57.62    4.63
  -4   2  25   59.60    4.64
   4  -2 -25   61.26    4.73
   4   2 -25   55.22    4.50
   4   2 -24  249.89    9.43
   4  -2 -24  220.96    7.39
   4  -2 -24  233.98    7.44
   4  -2 -24  243.55    2.83
  -4  -2  24  251.21    9.34
  -4   2  24  250.85    9.17
   4  -2 -24  244.06    9.03
   4   2 -24  236.34    8.95
   4   2 -23    0.46    0.56
   4  -2 -23    1.27    0.63
   4  -2 -23    1.35    0.60
   4  -2 -23    1.09    0.26
  -4  -2  23   -0.86    1.00
  -4   2  23    0.63    0.60
   4  -2 -23    0.91    0.91
   4   2 -22   14.09    2.15
   4  -2 -22   15.18    1.81
   4  -2 -22   15.13    0.93
   4  -2 -22   12.67    1.67
  -4   2  22   16.71    2.25
  -4  -2  22   13.11    2.04
   4  -2 -22   12.95    1.94
   4   2 -21  262.61    8.94
   4  -2 -21  262.46    7.46
   4  -2 -21  265.09    7.48
  -4  -2  21  262.48    8.81
  -4   2  21  261.81    8.53
   4  -2 -21  263.64    8.53
   4  -2 -20    2.22    0.83
   4   2 -20    1.51    0.79
  -4   2  20    2.22    0.90
   4  -2 -20    1.95    0.77
   4  -2 -20    2.04    0.67
   4  -2 -20    2.15    1.02
  -4   2  20    2.97    1.04
  -4  -2  20    1.30    0.63
  -4  -2  20    1.99    0.84
   4  -2 -20    3.04    1.02
   4   2 -19   69.79    4.36
  -4   2  19   74.93    4.19
   4  -2 -19   71.14    3.99
   4  -2 -19   69.84    3.66
  -4  -2  19   70.79    4.33
   4  -2 -19   80.36    4.20
   4   2 -19   80.71    4.35
  -4  -2  19   71.46    4.06
  -4   2  19   75.37    4.29
   4  -2 -19   74.89    4.22
   4  -2 -19   74.03    3.82
   4   2 -18   17.50    2.11
  -4  -2  18   19.63    2.30
  -4   2  18   20.00    2.09
   4  -2 -18   19.81    2.06
   4  -2 -18   18.31    1.81
   4  -2 -18   17.75    1.92
  -4  -2  18   17.28    1.95
   4   2 -18   19.19    2.08
  -4  -2  18   18.67    2.15
  -4   2  18   17.75    2.01
   4  -2 -18   19.83    1.94
   4  -2 -18   19.30    2.08
   4   2 -17   15.89    1.95
  -4  -2  17   18.51    2.18
  -4   2  17   15.16    1.74
   4  -2 -17   16.78    1.79
   4  -2 -17   15.68    1.71
   4  -2 -17   15.16    1.74
   4   2 -17   17.26    1.88
  -4  -2  17   16.01    1.85
  -4  -2  17   15.85    1.92
  -4   2  17   14.37    1.74
   4  -2 -17   17.52    1.79
   4  -2 -17   15.16    1.78
   4  -2 -16    4.33    0.84
   4   2 -16    1.25    0.53
  -4   2  16    1.53    0.55
  -4  -2  16    1.09    0.69
   4  -2 -16    1.51    0.63
   4  -2 -16    2.36    0.69
   4   2 -16    1.58    0.67
  -4  -2  16    1.51    0.72
  -4  -2  16    1.35    0.55
   4  -2 -16    1.50    0.62
   4  -2 -16    1.85    0.74
  -4   2  16    1.58    0.67
  -4  -2  16    1.72    0.42
   4  -2 -16    1.99    0.72
   4   2 -15  458.13    9.76
   4  -2 -15  461.95    8.59
  -4   2  15  452.50    8.69
  -4  -2  15  470.09   10.01
   4  -2 -15  453.47    8.41
  -4  -2  15  450.23    8.78
   4   2 -15  467.01    9.06
   4  -2 -15  467.47    8.64
  -4   2  15  459.06    9.01
   4  -2 -15  469.09    9.24
   4  -2 -15  463.48    9.04
   4  -2 -15  449.91    8.60
  -4  -2  15  449.09    6.35
  -4  -2  14  441.42    9.36
   4   2 -14  424.11    9.10
  -4   2  14  438.00    8.16
   4  -2 -14  438.67    8.00
   4  -2 -14  424.65    7.93
   4  -2 -14  430.03    8.51
   4   2 -14  425.32    8.30
  -4  -2  14  411.88    8.08
  -4   2  14  437.97    8.39
  -4  -2  14  419.87    6.07
   4  -2 -14  434.19    8.20
   4  -2 -14  447.03    8.48
   4   2 -13  639.44   10.75
  -4  -2  13  655.82   11.05
  -4  -2  13  636.22    7.25
  -4   2  13  640.72    9.36
   4  -2 -13  626.12    9.11
   4  -2 -13  629.20    9.39
  -4  -2  13  632.51    9.59
  -4   2  13  652.07    9.80
   4  -2 -13  643.77    9.92
   4   2 -13  648.24    9.82
   4  -2 -13  654.15    9.78
   4  -2 -13  633.79    9.64
  -4  -2  12  811.53   11.80
   4  -2 -12  801.49    9.75
   4   2 -12  791.72   11.51
  -4  -2  12  782.45    7.83
  -4   2  12  789.14    9.83
   4  -2 -12  714.96    9.75
  -4  -2  12  762.80   10.05
   4   2 -12  788.48   10.34
   4  -2 -12  787.59   10.40
  -4   2  12  786.72   10.22
   4  -2 -12  816.69   10.38
   4  -2 -12  808.42   10.56
   4  -2 -11   26.93    1.69
  -4   2  11   26.65    1.72
   4   2 -11   26.37    2.04
  -4  -2  11   28.03    2.15
  -4  -2  11   27.06    1.44
   4  -2 -11   28.43    1.88
   4   2 -11   26.76    1.85
  -4   2  11   28.39    1.85
   4  -2 -11   27.59    1.85
  -4  -2  11   24.14    1.72
   4  -2 -11   28.25    1.94
   4  -2 -11   28.82    1.85
   4  -2 -10  374.81    5.82
  -4   2  10  368.27    5.88
  -4  -2  10  368.16    5.21
  -4  -2  10  366.79    7.39
   4   2 -10  372.96    7.35
   4  -2 -10  355.60    6.51
   4  -2 -10  371.73    6.32
  -4  -2  10  361.90    6.35
   4   2 -10  368.85    6.47
  -4   2  10  374.37    6.26
   4  -2 -10  376.59    6.28
   4  -2 -10  362.53    6.70
  -4  -2   9    6.19    0.69
   4  -2  -9    7.00    0.76
  -4  -2   9    7.13    1.00
   4   2  -9    6.16    0.95
  -4   2   9    7.35    0.77
   4  -2  -9    7.97    0.97
   4  -2  -9    6.46    0.77
   4   2  -9    5.66    0.83
  -4  -2   9    6.12    0.84
  -4   2   9    6.46    0.81
   4  -2  -9    7.23    0.84
   4  -2  -9    8.37    1.09
   4  -2  -8 1671.74   10.27
  -4   2   8 1650.15   10.41
  -4  -2   8 1665.65   14.39
  -4  -2   8 1668.36   10.84
   4   2  -8 1651.75   14.21
   4  -2  -8 1567.77   13.00
   4  -2  -8 1625.73   11.54
   4   2  -8 1645.51   12.46
  -4  -2   8 1651.17   12.28
  -4   2   8 1613.44   11.54
   4  -2  -8 1649.29   11.54
   4  -2  -8 1684.37   13.49
   4   2  -7  502.85    7.51
  -4  -2   7  508.13    7.53
  -4   2   7  488.74    5.07
   4  -2  -7  503.38    5.03
   4  -2  -7  509.90    7.04
  -4   2   7  496.15    7.00
   4   2  -7  521.39    6.65
  -4  -2   7  497.22    6.44
  -4   2   7  498.77    5.79
   4  -2  -7  493.21    5.77
   4  -2  -7  504.57    5.82
  -4   2   7  485.26    5.66
   4  -2  -7  498.26    7.16
   4  -2  -6 3082.65   10.63
  -4   2   6 2965.27   10.73
   4   2  -6 2980.33   17.80
  -4  -2   6 2978.33   17.84
   4  -2  -6 3046.34   16.84
  -4   2   6 3154.55   17.08
  -4  -2   6 3093.28   15.39
   4  -2  -6 2981.21   12.75
  -4   2   6 3041.82   12.84
   4  -2  -6 3046.39   17.12
  -4   2   6 2983.20   12.63
   4   2  -6 3048.38   15.46
   4  -2  -6 3112.56   12.95
  -4  -2   5 1503.64   12.05
   4   2  -5 1514.37   12.14
   4  -2  -5 1513.62    5.98
   4  -2  -5 1510.50   10.43
  -4   2   5 1543.81   11.93
   4  -2  -5 1517.51   11.35
  -4   2   5 1485.52   11.40
   4  -2  -5 1445.29    7.88
  -4  -2   5 1505.14   10.40
  -4   2   5 1511.24    7.90
   4   2  -5 1533.16   11.79
   4  -2  -5 1482.64   11.61
  -4   2   5 1511.56   11.68
   4   2  -5 1509.55   10.54
   4  -2  -5 1514.90    8.00
  -4   2   5 1462.56    7.90
   4   2  -4 4625.07   20.53
  -4  -2   4 4667.96   20.20
  -4   2   4 4782.28   19.83
   4  -2  -4 4695.38   18.61
  -4   2   4 4700.63   20.28
  -4   2   4 4597.20   11.75
   4  -2  -4 4661.59   11.80
   4  -2  -4 4722.67   12.07
  -4   2   4 4672.73   12.00
  -4   2   4 4777.98   19.95
   4  -2  -4 4665.51   19.77
  -4  -2   4 4581.81   17.91
   4   2  -4 4701.70   19.93
   4  -2  -3  930.09    8.74
   4  -2  -3  938.06    8.30
  -4   2   3  916.01    8.74
   4  -2  -3  922.14    8.46
  -4   2   3  936.31    8.57
   4   2  -3  932.50    8.92
  -4  -2   3  937.23    8.81
  -4  -2   3  937.16    8.78
  -4   2   3  928.52    8.50
   4  -2  -3  954.84    8.53
   4  -2  -3  895.48    6.76
   4   2  -3  928.86    8.67
   4  -2  -2  312.02    4.70
   4   2  -2  322.14    5.12
   4  -2  -2  313.06    4.91
  -4   2   2  302.82    4.82
   4  -2  -2  314.98    4.84
  -4   2   2  298.99    4.79
   4  -2  -2  306.60    4.96
  -4  -2   2  307.29    5.00
   4  -2  -2  320.92    4.12
  -4   2   2  303.47    4.05
  -4  -2   2  318.37    5.05
  -4   2   2  318.09    4.75
   4   2  -2  308.75    4.96
   4  -2  -1    3.76    0.53
   4  -2  -1    3.31    0.35
   4  -2  -1    3.59    0.62
  -4   2   1    3.15    0.60
  -4  -2   1    3.38    0.60
   4   2  -1    3.89    0.63
  -4   2   1    3.20    0.58
   4  -2  -1    3.33    0.60
  -4  -2   1    3.98    0.65
   4   2  -1    3.55    0.60
  -4   2   1    3.45    0.51
  -4   2   1    3.24    0.33
  -4   2   1    4.66    0.62
   4  -2   0  434.15    4.40
   4  -2   0  422.26    5.01
   4  -2   0  424.02    5.52
  -4   2   0  430.33    5.82
   4   2   0  445.32    6.07
   4  -2   0  429.52    5.89
  -4   2   0  436.37    5.54
  -4   2   0  427.66    5.38
  -4  -2   0  432.08    5.96
   4  -2   0  437.58    5.33
  -4   2   0  438.74    5.05
  -4  -2   0  428.52    6.00
   4   2   0  434.19    5.95
   4  -2   1 2340.33   11.66
   4  -2   1 2295.10   10.96
   4  -2   1 2322.17   13.92
  -4   2  -1 2361.37   12.86
  -4   2  -1 2257.54   13.74
  -4  -2  -1 2321.89   14.27
   4   2   1 2364.85   14.37
   4  -2   1 2344.18   13.21
  -4   2  -1 2315.16   13.21
   4   2   1 2276.75   14.11
  -4  -2  -1 2300.82   14.29
  -4   2  -1 2349.83   11.07
   4  -2   2  447.57    4.57
   4  -2   2  455.65    5.72
  -4   2  -2  461.54    5.70
   4  -2   2  457.53    6.28
  -4   2  -2  457.53    6.26
  -4   2  -2  467.93    5.75
  -4   2  -2  460.17    6.28
  -4  -2  -2  460.45    6.54
   4   2   2  456.72    6.65
   4  -2   2  457.44    5.08
   4  -2   2  465.54    6.30
  -4   2  -2  428.54    4.56
  -4  -2  -2  467.81    6.67
   4   2   2  454.58    6.53
  -4   2  -3    3.69    0.39
   4  -2   3    7.46    0.83
  -4   2  -3    4.70    0.67
   4  -2   3    3.99    0.44
  -4   2  -3    4.26    0.60
  -4   2  -3    4.42    0.74
   4  -2   3    4.01    0.63
  -4  -2  -3    5.61    0.76
  -4   2  -3    4.50    0.67
   4   2   3    4.57    0.77
   4  -2   3    4.15    0.56
   4  -2   3    4.89    0.72
  -4  -2  -3    4.59    0.76
   4   2   3    5.08    0.77
   4  -2   4  457.69    6.76
  -4   2  -4  463.57    6.70
  -4   2  -4  451.90    4.06
   4  -2   4  463.43    6.58
  -4   2  -4  467.79    6.58
   4   2   4  450.95    4.15
  -4  -2  -4  454.98    7.13
   4  -2   4  454.45    6.16
   4  -2   4  456.04    7.02
  -4   2  -4  448.14    7.00
   4   2   4  453.96    7.16
  -4  -2  -4  456.49    7.21
   4   2   4  449.81    7.14
   4  -2   5 1815.72   14.25
  -4   2  -5 1815.52   14.18
  -4   2  -5 1766.09   12.97
   4  -2   5 1766.04   13.02
   4  -2   5 1773.13   13.11
  -4   2  -5 1794.61   14.62
   4   2   5 1779.23   14.76
  -4  -2  -5 1778.37   14.76
   4  -2   5 1764.03   14.51
   4   2   5 1756.99   14.71
  -4  -2  -5 1773.92   14.80
  -4   2  -6 1593.95   14.14
  -4   2  -6 1571.57    6.54
   4  -2   6 1626.86   14.36
   4   2   6 1574.52    7.62
  -4   2  -6 1595.28   12.47
   4  -2   6 1595.76   14.46
  -4   2  -6 1606.01   14.60
   4  -2   6 1606.65   13.35
  -4  -2  -6 1612.73   14.58
   4   2   6 1598.47   14.55
  -4  -2  -6 1588.88   14.69
   4   2   6 1620.03   14.69
  -4   2  -7  121.34    1.71
   4  -2   7  128.09    4.28
  -4   2  -7  134.58    4.35
  -4   2  -7  128.57    3.61
   4  -2   7  126.12    3.99
  -4   2  -7  128.41    4.33
   4   2   7  122.59    4.22
   4  -2   7  124.47    4.22
  -4  -2  -7  128.32    4.35
   4   2   7  125.65    4.26
  -4  -2  -7  125.61    4.28
   4  -2   8  756.52   10.85
  -4   2  -8  736.81   10.63
  -4   2  -8  727.70    8.71
  -4  -2  -8  717.50    5.47
   4  -2   8  753.07   10.20
  -4   2  -8  746.26   10.84
  -4  -2  -8  733.81   10.84
   4   2   8  721.90   10.68
   4  -2   8  745.72   10.82
  -4  -2  -8  731.17   10.77
   4   2   8  724.78   10.84
  -4   2  -9  192.55    5.72
   4  -2   9  202.30    5.88
   4   2   9  195.77    5.77
  -4  -2  -9  194.56    2.97
  -4   2  -9  194.12    4.57
  -4  -2  -9  195.96    5.81
   4  -2   9  195.26    5.47
  -4   2  -9  194.50    5.79
   4   2   9  193.31    5.74
   4  -2   9  192.97    5.81
   4   2   9  204.67    5.95
  -4  -2  -9  196.76    5.82
   4   2  10 1299.94   15.38
  -4   2 -10 1259.69   15.13
   4  -2  10 1317.28   15.66
  -4   2 -10 1253.16   11.84
  -4  -2 -10 1225.15    7.83
  -4   2 -10 1313.29   15.64
   4   2  10 1248.57   15.11
   4  -2  10 1258.47   14.46
  -4  -2 -10 1248.51   15.29
   4  -2  10 1261.04   15.27
  -4  -2 -10 1227.12   15.15
   4   2  10 1261.85   15.27
   4   2  11  402.10    8.88
   4  -2  11  410.56    9.06
  -4   2 -11  393.79    8.80
  -4   2 -11  366.79    6.51
  -4  -2 -11  383.68    4.57
   4  -2  11  378.10    8.69
  -4   2 -11  399.63    8.94
  -4  -2 -11  382.02    8.74
   4  -2  11  379.91    8.34
   4   2  11  382.22    8.64
  -4   2 -11  390.05    8.41
   4   2  11  388.20    8.81
  -4  -2 -11  385.52    8.78
   4  -2  12  542.98   10.87
  -4   2 -12  517.31   10.49
   4   2  12  526.09   10.57
  -4   2 -12  520.67    7.90
  -4  -2 -12  506.63    5.52
  -4   2 -12  547.98   10.91
   4  -2  12  520.04   10.12
   4  -2  12  512.17   10.43
   4   2  12  528.83   10.49
  -4  -2 -12  533.57   10.63
  -4   2 -12  506.03   10.01
   4   2  12  535.27   10.66
  -4  -2 -12  520.86   10.52
  -4   2 -13  433.59    9.94
   4  -2  13  463.51   10.49
   4   2  13  427.43    9.87
  -4  -2 -13  410.70    5.17
  -4   2 -13  427.62    7.25
   4  -2  13  414.32    9.38
   4   2  13  441.12    9.90
   4  -2  13  422.05    9.85
  -4   2 -13  449.70   10.19
  -4  -2 -13  444.65   10.10
   4   2  13  437.28    9.94
  -4  -2 -13  436.72    9.90
  -4   2 -13  420.78    9.46
  -4   2 -14  963.18   15.36
   4  -2  14 1014.97   16.04
   4   2  14 1002.34   15.62
  -4   2 -14  966.57   11.03
  -4  -2 -14  967.61    8.23
   4  -2  14  978.73   14.92
  -4  -2 -14 1017.89   15.76
  -4  -2 -14 1026.85   15.90
   4   2  14  964.06   15.24
   4  -2  14  945.87   15.24
  -4   2 -14 1028.80   15.85
  -4   2 -14  958.11   14.87
  -4  -2 -14  978.70   15.41
  -4   2 -15    4.26    0.76
  -4  -2 -15    3.89    0.55
   4  -2  15    4.96    1.14
   4   2  15    6.53    1.37
  -4   2 -15    4.31    1.13
  -4  -2 -15    4.87    1.25
  -4   2 -16  794.98   10.19
  -4  -2 -16  800.48    8.04
   4   2  16  816.69   14.83
   4  -2  16  785.12   14.37
  -4   2 -16  810.30   14.65
  -4  -2 -16  801.45   14.83
  -4   2 -17   31.91    2.08
  -4  -2 -17   32.04    1.67
   4  -2  17   30.95    2.97
   4   2  17   34.48    3.17
  -4   2 -17   31.77    3.04
  -4  -2 -17   36.72    3.27
  -4   2 -18  105.91    3.76
  -4  -2 -18  109.09    3.13
   4  -2  18  106.26    5.68
   4   2  18  107.72    5.79
  -4   2 -18  108.48    5.70
  -4  -2 -18  105.12    5.70
  -4   2 -19   73.75    3.17
  -4  -2 -19   78.01    2.71
   4   2  19   75.17    4.98
   4  -2  19   72.57    4.82
  -4   2 -19   78.67    5.03
  -4  -2 -19   84.74    5.26
  -4  -2 -20  115.04    3.36
  -4   2 -20  106.82    3.82
   4   2  20  107.81    6.14
   4  -2  20  108.83    6.03
  -4  -2 -20  117.91    6.39
  -4   2 -20  109.48    6.09
   4  -2  21   47.50    4.13
   4   2  21   54.77    4.49
  -4   2 -21   50.83    4.31
  -4  -2 -21   50.61    4.29
   4   2  22   82.56    5.66
   4  -2  22   76.58    5.44
  -4   2 -22   77.09    5.44
  -4  -2 -22   77.60    5.51
   4   2  23   18.10    2.71
   4  -2  23   19.90    2.90
  -4  -2 -23   18.89    2.89
  -4   2 -23   20.35    2.96
   4  -2  24   54.26    4.86
   4   2  24   50.70    4.71
  -4   2 -24   48.10    4.56
  -4  -2 -24   51.56    4.75
   4   2  25    3.75    1.53
   4  -2  25    2.48    0.90
  -4   2 -25    3.47    1.23
  -4  -2 -25    5.44    1.67
   4   2  26   52.60    5.05
   4  -2  26   50.61    4.93
  -4   2 -26   51.90    4.93
  -4  -2 -26   47.46    4.75
  -4   4  30  191.90    9.61
   4  -4 -30  187.45    9.50
   4   4 -29    1.69    0.79
  -4  -4  29    1.97    1.28
  -4   4  29    1.58    0.56
   4   4 -29    6.02    1.88
   4  -4 -29    2.90    1.41
   4   4 -28  216.95   10.19
  -4   4  28  216.72    9.64
  -4  -4  28  222.72   10.12
   4  -4 -28  206.89    9.38
   4   4 -27   33.16    3.91
  -4  -4  27   39.16    4.22
  -4   4  27   36.19    3.84
   4  -4 -27   36.52    3.92
   4   4 -26  643.42   16.64
  -4  -4  26  667.11   16.78
  -4   4  26  669.52   15.99
  -4  -4  26  645.58   15.73
   4  -4 -26  655.61   15.85
   4   4 -25   53.80    4.79
  -4  -4  25   53.09    4.64
  -4   4  25   56.96    4.52
  -4  -4  25   54.99    4.49
   4  -4 -25   52.81    4.36
   4   4 -24  129.92    7.18
  -4  -4  24  124.63    6.90
  -4  -4  24  120.56    6.47
  -4   4  24  130.38    6.65
   4  -4 -24  128.88    6.65
   4   4 -23    3.91    1.20
  -4  -4  23    7.32    1.71
  -4  -4  23    6.07    1.37
  -4   4  23    7.69    1.64
   4  -4 -23    6.79    1.51
   4   4 -22  198.80    8.36
   4  -4 -22  185.83    6.56
  -4   4  22  200.87    7.81
  -4  -4  22  184.92    7.95
  -4  -4  22  195.14    7.79
   4  -4 -22  192.76    7.67
   4   4 -21   12.19    2.06
   4  -4 -21   12.61    1.71
  -4   4  21   18.09    2.27
  -4  -4  21   12.84    1.95
  -4  -4  21   13.63    2.09
   4  -4 -21   14.25    2.06
  -4   4  20  129.11    5.58
   4   4 -20  127.35    6.37
   4  -4 -20  134.85    5.42
   4  -4 -20  136.89    2.81
  -4  -4  20  128.90    6.26
  -4   4  20  138.03    6.07
  -4  -4  20  123.48    5.84
   4  -4 -20  137.13    6.09
  -4   4  19   11.65    1.64
   4   4 -19   11.17    1.83
   4  -4 -19   12.95    0.95
   4  -4 -19    9.45    1.43
  -4   4  19   10.36    1.60
  -4  -4  19   10.78    1.74
   4  -4 -19    8.95    1.50
   4  -4 -19   13.28    1.85
   4   4 -18    0.49    0.51
  -4   4  18    0.23    0.46
   4  -4 -18   -0.11    0.33
   4  -4 -18    1.14    0.37
   4  -4 -18    0.63    0.67
  -4   4  18    0.77    0.42
  -4  -4  18    0.32    0.46
   4  -4 -18    1.04    0.70
  -4  -4  18    0.42    0.23
   4  -4 -18   -0.07    0.39
  -4   4  17   20.67    1.99
   4   4 -17   19.30    2.30
   4  -4 -17   18.56    1.95
   4  -4 -17   20.95    1.28
   4  -4 -17   19.79    2.13
   4   4 -17   19.42    2.18
  -4   4  17   18.40    2.02
  -4  -4  17   16.27    1.95
   4  -4 -17   20.18    2.13
  -4  -4  17   20.71    1.27
   4  -4 -17   21.15    2.22
  -4  -4  16   22.55    2.48
  -4   4  16   25.46    2.09
   4   4 -16   22.31    2.41
  -4  -4  16   22.34    1.35
   4  -4 -16   24.49    1.43
   4  -4 -16   20.21    1.97
   4   4 -16   24.24    2.36
  -4  -4  16   20.44    2.11
  -4   4  16   23.01    2.22
   4  -4 -16   22.52    2.23
   4  -4 -16   24.70    2.29
   4  -4 -16   22.75    2.27
  -4  -4  15  112.24    5.31
  -4   4  15  110.32    4.17
  -4  -4  15  108.58    2.96
   4   4 -15  108.72    5.10
   4  -4 -15  110.25    3.15
   4  -4 -15  105.66    4.36
   4   4 -15  114.60    5.01
  -4   4  15  108.07    4.54
   4  -4 -15  113.79    4.70
  -4  -4  15  107.86    4.75
  -4   4  15  103.64    4.45
   4  -4 -15  115.46    5.00
   4  -4 -15  116.09    4.71
   4   4 -14  249.45    7.53
  -4  -4  14  267.34    7.90
  -4   4  14  256.34    6.02
  -4  -4  14  262.39    4.64
   4  -4 -14  256.17    6.69
   4  -4 -14  260.44    4.87
  -4  -4  14  251.42    7.02
   4   4 -14  257.43    7.28
  -4   4  14  245.73    6.60
   4  -4 -14  256.32    6.79
  -4   4  14  259.37    6.81
   4  -4 -14  273.02    7.53
   4  -4 -14  261.73    6.83
   4   4 -13  413.36    9.46
  -4  -4  13  447.26    9.90
  -4   4  13  419.02    7.28
  -4  -4  13  423.82    5.95
   4  -4 -13  437.23    6.37
   4  -4 -13  434.85    8.55
   4   4 -13  435.22    9.22
   4  -4 -13  416.42    8.27
  -4  -4  13  422.38    8.83
  -4   4  13  419.78    8.29
   4  -4 -13  435.93    9.32
   4  -4 -13  422.08    8.41
  -4   4  13  414.39    8.25
  -4   4  12  254.72    5.40
  -4  -4  12  280.25    7.64
   4   4 -12  255.16    7.21
  -4  -4  12  264.98    4.75
   4  -4 -12  272.25    5.08
  -4   4  12  269.59    6.58
   4  -4 -12  271.31    6.69
   4   4 -12  264.22    6.95
  -4  -4  12  254.53    6.69
  -4   4  12  262.11    6.26
   4  -4 -12  260.72    6.30
   4  -4 -12  278.84    7.30
   4  -4 -12  273.32    6.44
  -4   4  12  261.90    6.26
   4   4 -11  127.49    4.93
  -4  -4  11  134.41    5.14
  -4   4  11  123.27    3.45
   4  -4 -11  129.89    3.57
   4  -4 -11  127.51    4.50
  -4   4  11  125.51    4.42
   4  -4 -11  125.19    4.19
  -4   4  11  125.63    4.13
  -4  -4  11  116.01    4.43
   4   4 -11  130.50    4.73
  -4   4  11  127.46    4.22
   4  -4 -11  129.17    4.24
   4  -4 -11  128.78    4.87
   4   4 -10 2003.89   18.91
  -4   4  10 2039.69   12.95
  -4  -4  10 2103.80   19.58
   4  -4 -10 2084.78   14.44
  -4   4  10 2143.86   18.12
   4  -4 -10 2048.43   17.72
  -4  -4  10 2034.24   17.84
  -4   4  10 2020.44   15.87
   4  -4 -10 1961.93   15.85
  -4   4  10 2005.70   15.96
   4  -4 -10 2027.88   16.04
   4  -4 -10 2070.34   18.98
   4   4 -10 2059.41   18.44
   4   4  -9  111.64    4.35
  -4   4   9  110.11    2.74
  -4  -4   9  118.40    4.47
   4  -4  -9  116.18    3.45
   4  -4  -9  111.52    4.03
  -4   4   9  114.95    4.08
  -4  -4   9  113.67    4.17
   4  -4  -9  111.50    3.55
  -4   4   9  114.46    3.61
  -4   4   9  110.99    3.57
   4  -4  -9  113.74    3.62
   4  -4  -9  111.20    4.35
   4   4  -9  116.96    4.26
   4   4  -8  460.28    8.53
  -4   4   8  448.15    5.00
  -4  -4   8  466.31    8.71
  -4   4   8  457.67    8.25
  -4   4   8  466.59    8.16
   4  -4  -8  480.67    7.09
   4  -4  -8  450.02    8.09
   4  -4  -8  456.02    6.83
  -4   4   8  465.08    6.91
  -4  -4   8  472.34    8.23
   4   4  -8  461.56    8.66
   4  -4  -8  472.12    7.02
   4   4  -8  465.43    8.32
  -4   4   8  458.43    6.91
   4  -4  -8  473.95    8.66
  -4   4   7  457.20    4.42
   4   4  -7  456.83    8.36
  -4  -4   7  471.39    8.44
  -4   4   7  475.86    8.16
   4  -4  -7  467.77    8.06
   4  -4  -7  478.87    7.20
  -4   4   7  457.76    7.02
  -4   4   7  451.76    7.93
  -4   4   7  465.01    6.56
  -4  -4   7  471.64    8.11
   4  -4  -7  465.06    6.51
   4  -4  -7  470.46    6.69
   4  -4  -7  481.77    8.48
   4   4  -7  475.25    8.53
   4   4  -7  468.37    8.27
  -4   4   7  456.81    6.54
   4   4  -6 3585.15   22.69
  -4  -4   6 3575.54   22.64
  -4   4   6 3539.57   10.20
   4  -4  -6 3635.29   22.24
   4  -4  -6 3646.14   20.14
  -4   4   6 3602.86   19.84
  -4   4   6 3530.23   21.97
  -4   4   6 3748.66   22.43
  -4   4   6 3562.35   17.26
  -4  -4   6 3658.42   22.22
   4  -4  -6 3665.23   17.26
   4   4  -6 3687.98   22.71
   4  -4  -6 3675.75   22.78
   4   4  -6 3676.46   23.29
  -4   4   6 3580.94   17.54
   4  -4  -6 3593.52   17.68
   4   4  -5 1415.78   13.86
  -4  -4   5 1412.58   13.74
  -4   4   5 1388.23   12.51
   4  -4  -5 1426.01   12.74
   4  -4  -5 1425.35   13.63
  -4   4   5 1437.53   13.74
  -4   4   5 1384.86   13.39
   4  -4  -5 1393.23   10.17
   4  -4  -5 1396.26   10.61
  -4   4   5 1380.12   10.41
  -4  -4   5 1398.79   13.58
   4  -4  -5 1428.17   13.83
   4   4  -5 1420.66   14.13
  -4  -4   4 1332.92   13.00
   4   4  -4 1307.57   13.05
   4  -4  -4 1258.82   12.67
   4  -4  -4 1277.95   12.23
  -4   4   4 1270.59   12.65
  -4   4   4 1241.56   12.09
  -4   4   4 1336.12   13.18
   4  -4  -4 1247.70   12.83
   4  -4  -4 1267.00    9.36
   4   4  -4 1250.84   13.07
   4  -4  -4 1274.64    9.80
  -4  -4   4 1253.84   12.79
   4  -4  -4 1278.70   12.74
  -4   4   4 1235.23    9.57
  -4  -4   4 1291.97   13.23
   4   4  -3  104.47    3.64
  -4  -4   3  102.49    3.54
  -4   4   3   99.22    3.52
   4  -4  -3  105.24    3.64
  -4   4   3  102.93    3.64
   4  -4  -3   99.84    3.66
   4  -4  -3  106.65    3.57
   4  -4  -3  101.16    2.57
   4   4  -3  103.71    3.73
   4  -4  -3  105.64    2.78
   4  -4  -3  101.62    3.41
  -4   4   3  101.00    2.69
   4  -4  -3  104.89    3.54
  -4  -4   3   96.69    3.55
  -4  -4   3  105.01    3.76
   4  -4  -2  650.42    9.03
  -4   4   2  668.50    9.20
   4  -4  -2  635.82    8.92
   4  -4  -2  648.06    8.94
  -4   4   2  641.37    8.92
  -4  -4   2  643.24    8.74
   4   4  -2  657.79    8.94
  -4   4   2  611.15    4.47
   4  -4  -2  629.53    4.63
   4  -4  -2  625.49    8.41
  -4  -4   2  639.76    9.24
  -4   4   2  621.71    6.67
   4  -4  -2  644.95    8.48
   4  -4  -2  629.55    6.76
   4   4  -2  651.49    9.24
  -4   4   1  547.98    5.00
   4  -4  -1  554.92    5.12
   4   4  -1  564.67    8.20
  -4   4   1  544.05    8.37
   4  -4  -1  567.77    8.53
  -4  -4   1  558.43    4.98
  -4   4   1  572.78    8.55
  -4  -4   1  561.72    8.11
   4  -4  -1  557.81    8.02
   4   4  -1  554.38    8.57
  -4   4   1  538.09    7.97
  -4   4   1  545.02    6.37
   4  -4  -1  566.34    7.69
  -4  -4   1  575.10    8.73
  -4   4   0  429.98    5.00
   4  -4   0  431.88    5.12
   4   4   0  446.64    7.28
   4  -4   0  445.29    7.65
  -4   4   0  451.57    7.55
  -4  -4   0  429.96    7.04
  -4   4   0  431.02    7.51
  -4  -4   0  448.01    7.62
   4  -4   0  439.82    7.23
  -4  -4   0  436.77    7.67
   4  -4   0  428.84    6.47
  -4   4   0  427.73    7.28
  -4   4   0  419.44    5.77
   4   4   0  442.33    7.64
  -4   4  -1  270.87    4.40
   4  -4   1  274.43    4.49
  -4   4  -1  266.12    6.00
  -4   4  -1  266.65    5.93
   4  -4   1  285.18    6.18
   4   4   1  272.23    5.70
  -4  -4  -1  281.96    6.19
   4  -4   1  274.76    5.91
   4   4   1  275.62    6.16
  -4   4  -1  278.05    5.98
   4  -4   1  263.68    4.91
  -4   4  -1  270.31    4.84
  -4  -4  -1  280.43    6.19
  -4   4  -2   50.26    2.08
   4  -4   2   51.76    2.13
   4   4   2   53.76    2.57
   4   4   2   49.89    1.62
   4  -4   2   55.31    2.78
  -4   4  -2   52.37    2.64
  -4   4  -2   48.59    2.57
   4  -4   2   51.78    2.64
  -4  -4  -2   50.12    2.67
  -4  -4  -2   50.49    2.69
  -4   4  -2   50.72    2.66
   4   4   2   51.25    2.71
   4  -4   2   50.28    2.06
  -4   4  -3  297.42    5.44
   4  -4   3  291.62    5.47
   4   4   3  306.43    5.49
  -4   4  -3  305.25    6.30
   4   4   3  304.25    6.25
  -4   4  -3  290.52    6.40
   4  -4   3  296.12    6.40
  -4  -4  -3  296.58    6.61
   4   4   3  303.72    6.63
  -4   4  -3  293.15    6.53
  -4  -4  -3  297.32    6.63
   4   4   3  300.31    6.69
   4  -4   3  293.13    4.70
  -4   4  -4  293.29    5.75
   4  -4   4  281.41    5.77
   4  -4   4  277.51    4.33
  -4   4  -4  283.08    6.44
   4   4   4  290.61    5.30
   4   4   4  288.98    6.65
  -4   4  -4  301.61    6.70
  -4  -4  -4  294.29    6.67
   4  -4   4  294.73    6.63
  -4  -4  -4  288.31    6.65
   4   4   4  287.52    6.67
   4  -4   5  593.98    8.83
  -4   4  -5  591.48    8.66
   4  -4   5  574.50    5.79
   4   4   5  591.71    7.51
  -4   4  -5  569.09    9.25
   4  -4   5  580.40    9.54
  -4  -4  -5  596.25    9.75
  -4   4  -5  589.00    9.83
   4   4   5  577.43    9.68
   4   4   5  596.18    9.82
  -4  -4  -5  586.77    9.76
  -4   4  -6 1379.75   13.95
   4  -4   6 1390.64   14.21
   4  -4   6 1319.04    7.99
  -4   4  -6 1375.36   14.46
   4   4   6 1387.28   11.33
   4  -4   6 1379.49   15.20
   4   4   6 1415.05   15.48
  -4  -4  -6 1395.03   15.36
  -4   4  -6 1396.43   15.55
  -4  -4  -6 1369.09   15.31
   4   4   6 1413.80   15.57
   4  -4   7   11.73    0.65
   4  -4   7   13.51    1.48
  -4   4  -7   12.03    1.39
  -4   4  -7   12.56    1.43
   4   4   7   12.30    1.07
   4   4   7    9.66    1.34
   4  -4   7   11.61    1.50
  -4   4  -7   11.47    1.48
  -4  -4  -7   11.28    1.43
  -4  -4  -7   11.82    1.48
   4   4   7   12.33    1.51
  -4   4  -8  474.49    8.99
   4  -4   8  500.63    9.32
   4   4   8  473.98    6.58
  -4   4  -8  467.01    8.74
  -4   4  -8  499.63    9.87
   4  -4   8  483.46    9.61
  -4  -4  -8  494.26    9.73
   4   4   8  478.96    9.57
   4   4   8  486.49    9.69
  -4  -4  -8  490.90    9.68
  -4   4  -9   13.76    1.65
   4  -4   9   16.08    1.78
  -4   4  -9   15.31    1.62
   4   4   9   14.16    1.14
   4   4   9   13.41    0.86
   4  -4   9   13.51    1.67
  -4  -4  -9   15.85    1.78
   4  -4   9   13.21    1.51
   4   4   9   15.71    1.79
  -4   4  -9   13.97    1.71
   4   4   9   15.39    1.79
  -4  -4  -9   14.94    1.79
   4  -4  10 1656.12   18.40
  -4   4 -10 1539.02   17.61
  -4   4 -10 1583.00   16.41
   4   4  10 1551.46    7.79
   4   4  10 1590.18   12.24
   4   4  10 1582.25   18.38
   4  -4  10 1595.42   17.17
  -4   4 -10 1672.99   19.14
  -4  -4 -10 1628.99   18.72
   4  -4  10 1538.33   18.16
  -4  -4 -10 1559.48   18.37
   4   4  10 1627.76   18.79
   4  -4  11   42.59    3.08
  -4   4 -11   37.12    2.85
  -4   4 -11   39.94    2.64
   4   4  11   37.31    1.86
  -4  -4 -11   39.92    3.03
   4  -4  11   39.76    2.83
  -4   4 -11   40.96    3.10
   4  -4  11   36.94    2.92
   4   4  11   37.60    2.85
  -4  -4 -11   38.74    3.01
   4   4  11   39.44    3.01
   4  -4  12  137.59    5.74
  -4   4 -12  126.58    5.42
   4   4  12  132.17    5.42
  -4   4 -12  123.83    4.73
   4   4  12  132.07    5.61
   4  -4  12  130.29    5.63
  -4   4 -12  140.20    5.88
   4  -4  12  130.84    5.30
  -4  -4 -12  131.38    5.65
  -4  -4 -12  128.13    5.59
   4   4  12  137.43    5.79
  -4   4 -13   17.58    2.13
   4  -4  13   19.02    2.23
   4   4  13   18.28    2.08
  -4   4 -13   16.75    1.79
   4   4  13   15.45    2.01
   4  -4  13   16.77    1.95
   4  -4  13   16.94    2.06
  -4  -4 -13   15.66    2.02
  -4   4 -14 1278.47   18.44
   4   4  14 1346.75   18.33
  -4   4 -14 1271.75   15.57
   4   4  14 1361.69   19.12
   4  -4  14 1297.49   17.84
   4  -4  14 1287.96   18.72
  -4  -4 -14 1294.94   18.72
  -4   4 -15   98.71    5.28
  -4   4 -15   95.30    4.33
   4  -4  15   97.73    5.05
   4  -4  15  100.07    5.38
   4   4  15   97.29    5.26
  -4  -4 -15  104.29    5.44
  -4   4 -16  304.65    9.54
  -4  -4 -16  297.60    5.74
  -4   4 -16  290.40    7.65
   4  -4  16  308.21    9.25
   4   4  16  307.59    9.57
   4  -4  16  306.73    9.68
  -4  -4 -16  304.86    9.59
  -4   4 -17   37.96    3.50
  -4  -4 -17   40.90    2.15
  -4   4 -17   34.83    2.69
   4  -4  17   37.79    3.38
   4  -4  17   38.14    3.50
   4   4  17   40.48    3.57
  -4  -4 -17   34.34    3.31
  -4   4 -18  260.58    9.36
  -4  -4 -18  267.55    5.52
  -4   4 -18  250.17    7.23
   4  -4  18  253.09    9.25
   4  -4  18  262.90    9.10
   4   4  18  265.24    9.39
  -4  -4 -18  254.00    9.24
  -4   4 -18  272.56    9.22
  -4   4 -19   12.47    2.11
  -4   4 -19   13.04    1.64
   4  -4  19   12.30    2.01
   4   4  19   14.18    2.25
   4  -4  19   13.28    2.15
  -4   4 -19   13.41    2.13
  -4  -4 -19   14.18    2.36
  -4   4 -20   86.70    5.72
  -4   4 -20   84.46    4.31
   4  -4  20   88.17    5.59
   4  -4  20   91.73    5.88
   4   4  20   91.60    5.82
  -4   4 -20   94.28    5.77
  -4  -4 -20   95.60    5.96
   4  -4  21   28.96    3.29
   4   4  21   31.40    3.55
  -4   4 -21   30.89    3.45
  -4  -4 -21   32.90    3.54
   4  -4  22    0.90    0.58
   4   4  22    2.06    1.04
  -4   4 -22    0.93    0.60
  -4  -4 -22    2.59    1.11
   4  -4  23    1.41    0.91
   4   4  23    0.19    0.74
  -4   4 -23   -0.40    0.51
  -4  -4 -23   -1.43    1.21
   4  -4  24    7.53    1.81
   4   4  24    9.99    2.09
  -4   4 -24    8.66    1.99
  -4  -4 -24    9.34    2.08
   4   4  25    1.23    0.86
   4  -4  25    1.25    1.09
  -4   4 -25    0.69    0.63
  -4  -4 -25   -0.42    0.88
   4  -4  26  101.02    7.05
  -4   6  29    1.57    0.97
  -4  -6  29    1.41    0.91
   4  -6 -29    1.62    1.09
  -4   6  28  176.24    8.92
  -4  -6  28  184.63    9.32
   4  -6 -28  182.07    9.10
   4   6 -27   60.73    5.54
  -4  -6  27   58.32    5.30
  -4  -6  27   63.63    5.33
  -4   6  27   59.16    5.05
   4  -6 -27   60.22    5.12
   4   6 -26  155.34    8.57
  -4  -6  26  150.65    8.02
  -4  -6  26  156.59    8.50
  -4   6  26  150.63    7.83
   4  -6 -26  148.32    7.85
   4   6 -25    1.28    1.32
  -4   6  25    1.48    0.99
  -4  -6  25    0.83    0.63
  -4  -6  25    1.23    0.86
   4  -6 -25    0.95    0.91
   4   6 -24  353.44   12.35
  -4  -6  24  336.90   11.91
  -4   6  24  348.93   11.40
  -4  -6  24  349.74   11.70
   4  -6 -24  347.47   11.31
   4   6 -23  221.07    9.59
  -4  -6  23  229.62    9.55
  -4   6  23  221.58    8.76
  -4  -6  23  222.97    9.04
   4  -6 -23  220.75    8.80
   4   6 -22  285.32   10.57
  -4   6  22  294.41    9.85
  -4  -6  22  281.15    9.96
   4  -6 -22  277.89    9.59
   4   6 -21    0.21    0.79
  -4   6  21    0.18    0.48
  -4  -6  21   -1.69    1.14
  -4   6  21    0.00    0.70
   4  -6 -21   -0.53    0.62
  -4   6  20   12.58    1.72
   4   6 -20   12.61    2.13
  -4  -6  20   14.16    2.09
  -4   6  20   13.14    2.01
  -4  -6  20   12.93    0.76
   4  -6 -20   12.68    1.92
  -4   6  19   -0.33    0.46
   4   6 -19    0.33    0.76
  -4  -6  19   -0.11    0.21
  -4   6  19    0.26    0.55
  -4  -6  19    0.16    0.46
   4  -6 -19   -0.12    0.62
  -4  -6  18    1.09    0.37
   4   6 -18    0.25    0.48
  -4   6  18    0.88    0.49
   4  -6 -18    0.69    0.46
  -4   6  18    0.90    0.46
  -4  -6  18    2.09    0.88
   4  -6 -18    1.30    0.65
  -4   6  17   50.67    3.06
  -4  -6  17   52.94    2.15
   4   6 -17   46.16    3.78
   4  -6 -17   53.04    3.55
  -4  -6  17   50.26    3.80
  -4   6  17   48.63    3.47
   4  -6 -17   54.87    3.71
  -4   6  16  183.76    5.58
  -4  -6  16  185.32    4.17
   4   6 -16  177.14    7.23
   4  -6 -16  187.40    6.58
   4  -6 -16  179.55    6.53
  -4  -6  16  185.18    7.07
  -4   6  16  180.57    6.51
   4  -6 -16  181.68    6.54
  -4   6  16  181.43    6.53
   4   6 -15    2.85    1.00
  -4   6  15    2.67    0.70
  -4  -6  15    2.11    0.48
   4  -6 -15    1.86    0.83
  -4   6  15    2.18    0.70
  -4  -6  15    2.34    0.72
  -4   6  15    2.27    0.72
   4  -6 -15    2.43    0.79
   4  -6 -15    2.67    0.81
  -4   6  15    1.85    0.58
   4   6 -14  226.01    7.79
  -4   6  14  241.72    5.75
  -4   6  14  245.59    7.32
   4  -6 -14  244.59    7.37
  -4  -6  14  232.79    7.64
  -4   6  14  238.54    7.04
   4  -6 -14  246.93    7.16
   4  -6 -14  239.91    7.09
  -4   6  14  247.72    7.23
  -4  -6  13  158.62    6.40
   4   6 -13  147.13    6.12
  -4   6  13  142.78    4.22
   4  -6 -13  150.43    5.72
  -4   6  13  144.63    5.56
  -4   6  13  141.52    5.68
  -4   6  13  142.17    5.26
  -4  -6  13  139.35    5.79
   4  -6 -13  140.81    5.24
   4  -6 -13  139.10    5.24
  -4   6  13  143.64    5.33
   4   6 -13  151.97    6.23
  -4  -6  12  162.52    6.37
   4   6 -12  157.14    6.14
  -4   6  12  144.77    4.01
  -4   6  12  154.43    5.65
  -4   6  12  150.31    5.72
   4  -6 -12  156.75    5.75
  -4  -6  12  146.00    5.81
   4  -6 -12  150.15    5.24
  -4   6  12  144.47    5.14
  -4   6  12  150.89    5.31
   4  -6 -12  152.00    5.31
   4   6 -12  164.40    6.39
   4   6 -12  159.86    6.23
  -4  -6  11   20.72    2.15
  -4   6  11   14.92    1.21
   4   6 -11   16.70    1.95
  -4   6  11   15.94    1.81
  -4   6  11   15.69    1.81
   4  -6 -11   16.71    1.85
  -4  -6  11   18.03    2.04
  -4   6  11   16.61    1.69
   4  -6 -11   15.76    1.64
   4   6 -11   15.94    1.95
  -4   6  11   17.42    1.76
   4   6 -11   18.91    2.13
   4  -6 -11   17.35    1.78
  -4  -6  10  614.77   11.70
  -4   6  10  590.13    7.02
   4   6 -10  564.53   11.10
  -4   6  10  582.70   10.82
  -4   6  10  576.92    9.24
   4  -6 -10  605.84   11.07
  -4   6  10  593.89    7.00
  -4   6  10  601.67   11.05
  -4  -6  10  573.94   11.14
   4  -6 -10  578.46    9.68
  -4   6  10  584.23    9.69
  -4   6  10  586.64    9.89
   4  -6 -10  583.83    9.78
   4   6 -10  606.95   11.80
   4   6 -10  622.55   11.86
  -4  -6   9  161.41    5.88
  -4   6   9  159.21    3.38
   4   6  -9  149.12    5.59
   4  -6  -9  162.64    5.74
  -4   6   9  152.86    4.84
  -4   6   9  157.49    3.41
  -4   6   9  147.95    5.35
  -4   6   9  159.46    5.58
  -4   6   9  147.81    4.73
   4  -6  -9  154.04    4.82
  -4  -6   9  155.31    5.74
   4   6  -9  164.19    6.02
   4   6  -9  158.84    6.00
   4  -6  -9  154.66    4.91
  -4   6   9  155.08    4.91
  -4  -6   8 1352.66   16.48
  -4   6   8 1276.08    8.88
   4   6  -8 1304.69   16.11
  -4   6   8 1310.28   15.59
   4  -6  -8 1378.93   16.40
  -4   6   8 1292.95   14.18
  -4   6   8 1325.22    9.15
  -4   6   8 1342.04   16.04
   4  -6  -8 1307.19   13.44
  -4  -6   8 1285.11   16.24
   4  -6  -8 1305.41   13.92
   4   6  -8 1380.67   17.21
  -4   6   8 1303.40   13.78
   4   6  -7  388.73    8.59
  -4   6   7  396.92    4.73
  -4  -6   7  404.86    8.80
  -4   6   7  389.27    8.64
  -4   6   7  379.23    8.29
   4  -6  -7  400.87    8.92
  -4   6   7  381.09    7.76
   4  -6  -7  383.92    7.11
  -4  -6   7  394.94    8.92
   4   6  -7  396.43    9.06
  -4   6   7  386.07    7.32
   4  -6  -7  380.76    7.34
   4   6  -6 2197.65   20.20
  -4   6   6 2218.68   10.68
  -4  -6   6 2264.08   20.32
   4  -6  -6 2251.03   20.86
  -4   6   6 2196.83   18.95
  -4   6   6 2320.29   20.99
  -4   6   6 2242.04   19.81
   4  -6  -6 2189.28   16.47
   4   6  -6 2322.05   21.53
  -4   6   6 2192.94   16.99
   4  -6  -6 2198.06   17.24
  -4  -6   6 2222.90   21.02
   4   6  -5   20.44    1.90
  -4   6   5   20.21    1.00
  -4  -6   5   18.67    1.78
   4  -6  -5   17.33    1.79
  -4   6   5   20.06    1.97
  -4   6   5   18.14    1.74
   4  -6  -5   17.22    1.44
   4  -6  -5   17.54    1.48
  -4   6   5   17.93    1.50
   4   6  -5   19.23    1.95
  -4  -6   5   17.26    1.79
  -4  -6   4 1038.79   13.19
  -4   6   4 1006.26    7.20
   4   6  -4 1008.50   13.16
   4  -6  -4 1003.73   13.25
  -4   6   4 1009.98   13.18
  -4   6   4 1078.82   14.14
   4  -6  -4 1013.69   10.89
   4  -6  -4 1034.45   13.51
   4  -6  -4 1016.06   11.38
  -4  -6   4  996.38   13.97
  -4  -6   4 1009.52   13.88
   4   6  -4 1032.55   14.14
  -4   6   4 1005.14   11.17
   4   6  -3    4.91    0.95
  -4   6   3    4.63    0.53
  -4   6   3    4.91    0.99
   4  -6  -3    3.54    0.74
   4  -6  -3    4.64    0.51
  -4   6   3    4.47    0.99
  -4  -6   3    5.61    0.91
   4  -6  -3    4.01    0.67
  -4   6   3    5.65    0.86
   4   6  -3    3.36    0.70
  -4  -6   3    4.31    1.02
   4  -6  -3    4.87    1.00
   4  -6  -3    4.06    0.70
  -4  -6   3    4.56    0.91
  -4  -6   2  206.59    4.38
  -4   6   2  204.90    6.09
   4  -6  -2  206.03    3.64
   4  -6  -2  202.84    5.96
  -4   6   2  213.61    6.35
  -4  -6   2  216.46    5.81
  -4   6   2  210.58    3.71
   4   6  -2  215.63    5.93
  -4   6   2  202.30    5.00
   4  -6  -2  197.07    4.98
  -4  -6   2  215.39    6.39
  -4  -6   2  212.38    6.42
   4   6  -2  219.13    6.42
   4  -6  -2  211.46    6.10
  -4   6   1   44.90    2.96
  -4  -6   1   44.03    2.62
  -4  -6   1   43.23    1.94
  -4   6   1   46.06    2.94
   4  -6  -1   44.42    2.78
  -4   6   1   44.37    1.83
   4  -6  -1   44.77    1.85
   4   6  -1   42.71    2.62
   4   6  -1   43.07    2.85
   4  -6  -1   43.21    2.80
  -4   6   1   44.46    2.39
  -4  -6   1   46.25    2.97
   4   6   0  100.40    3.99
   4  -6   0   98.45    2.94
  -4   6   0   97.66    2.90
  -4   6   0   95.28    4.20
  -4   6   0   96.02    4.28
  -4  -6   0   95.58    3.82
  -4  -6   0   94.61    2.87
   4  -6   0   93.26    4.13
  -4  -6   0   98.40    4.28
   4   6   0   97.52    4.29
  -4  -6   0   96.87    4.29
  -4   6   0   94.75    3.50
   4  -6   1   26.51    1.64
  -4   6  -1   26.20    1.60
   4   6   1   25.60    2.02
  -4   6  -1   26.78    2.29
  -4   6  -1   25.42    2.23
  -4  -6  -1   27.53    2.29
   4  -6   1   24.89    2.15
  -4   6  -1   25.53    2.22
  -4  -6  -1   23.70    2.16
  -4   6  -1   24.63    1.83
   4   6   1   25.84    2.22
  -4   6  -2  294.15    5.68
   4  -6   2  289.45    5.75
  -4   6  -2  297.21    7.62
  -4   6  -2  303.05    7.64
   4   6   2  303.68    6.97
   4  -6   2  299.64    7.56
  -4  -6  -2  299.94    7.60
   4   6   2  302.49    7.67
   4  -6   2  287.76    6.21
  -4  -6  -2  303.30    7.69
  -4   6  -2  293.09    6.42
  -4   6  -2  298.49    7.69
   4  -6   3    8.25    1.02
  -4   6  -3    8.13    1.00
  -4   6  -3    7.20    1.20
   4   6   3    9.54    1.30
   4   6   3    9.34    1.23
  -4   6  -3    7.62    1.30
  -4  -6  -3    6.28    1.11
   4  -6   3    7.81    1.21
   4  -6   3    7.81    0.99
  -4   6  -3    7.25    1.23
  -4  -6  -3    7.49    1.27
   4   6   3    7.71    1.25
  -4   6  -3    7.37    1.06
   4  -6   4   80.12    3.38
  -4   6  -4   76.79    3.25
  -4   6  -4   74.91    3.94
   4   6   4   73.59    2.69
   4   6   4   75.96    3.54
  -4   6  -4   79.33    3.92
   4   6   4   76.53    3.48
   4  -6   4   75.88    3.92
  -4  -6  -4   79.36    4.05
  -4  -6  -4   73.96    3.91
   4  -6   4   75.91    2.97
  -4   6  -4   80.86    4.13
  -4   6  -4   78.20    3.54
   4   6   4   81.65    4.10
   4  -6   5   49.33    2.76
  -4   6  -5   48.31    2.73
   4   6   5   48.41    2.89
   4   6   5   50.10    2.81
   4   6   5   48.43    2.30
  -4   6  -5   50.58    3.27
   4  -6   5   47.94    3.18
  -4  -6  -5   53.90    3.36
  -4  -6  -5   51.25    3.31
   4   6   5   51.90    3.33
   4  -6   5   49.88    2.30
  -4   6  -5   51.51    3.36
  -4   6  -5   51.63    2.97
  -4   6  -6  606.96    9.98
   4  -6   6  614.19   10.17
   4   6   6  597.71    8.37
   4   6   6  605.98   10.33
   4   6   6  599.42    9.64
  -4   6  -6  616.39   11.56
  -4  -6  -6  629.97   11.65
   4  -6   6  600.86   11.44
  -4  -6  -6  594.75   11.42
   4   6   6  617.66   11.63
  -4   6  -6  648.94   12.12
   4  -6   6  588.58    7.53
   4  -6   7  100.01    4.31
  -4   6  -7   95.55    4.13
   4   6   7   99.77    4.28
  -4   6  -7  102.23    4.73
   4   6   7  100.31    3.57
   4   6   7  101.35    3.96
  -4   6  -7  100.93    4.87
   4   6   7  106.07    4.86
  -4  -6  -7  100.01    4.73
   4  -6   7   99.64    4.80
   4  -6   7   97.99    2.90
  -4  -6  -7  102.88    4.82
   4   6   7  103.20    4.84
  -4   6  -8 1262.39   15.64
   4  -6   8 1257.98    9.61
   4  -6   8 1340.72   16.27
   4   6   8 1289.56   14.13
  -4   6  -8 1330.14   17.21
   4   6   8 1253.81   12.10
   4   6   8 1278.77   17.28
  -4  -6  -8 1366.60   17.80
   4  -6   8 1287.80   17.52
  -4   6  -8 1390.70   18.51
  -4  -6  -8 1270.35   17.28
   4   6   8 1342.19   17.86
  -4   6  -9   23.89    2.25
   4  -6   9   22.29    1.13
   4  -6   9   24.77    2.34
   4   6   9   24.08    1.62
   4   6   9   21.99    1.83
  -4   6  -9   26.99    2.52
  -4   6  -9   27.36    2.67
   4  -6   9   23.22    2.43
  -4  -6  -9   26.67    2.48
   4   6   9   26.16    2.55
  -4  -6  -9   27.60    2.60
   4   6   9   24.47    2.48
  -4   6 -10  470.37   10.24
   4  -6  10  494.09   10.63
   4  -6  10  466.93    3.92
  -4   6 -10  472.75   10.61
   4   6  10  471.08    8.39
   4   6  10  454.08    6.72
   4   6  10  455.10   10.80
   4  -6  10  468.37   11.03
  -4  -6 -10  467.75   11.00
  -4   6 -11  379.44    9.50
   4  -6  11  410.28   10.01
   4   6  11  388.30    5.84
   4   6  11  385.01    7.69
  -4   6 -11  388.59    9.69
   4   6  11  390.93   10.22
   4  -6  11  388.23   10.34
  -4  -6 -11  386.30   10.22
  -4   6 -12  742.55   13.78
   4   6  12  737.94    7.44
  -4   6 -12  714.81   13.28
   4   6  12  757.82   10.77
   4  -6  12  724.24   14.37
   4   6  12  743.97   14.44
  -4  -6 -12  729.02   14.34
  -4   6 -13   26.62    2.71
   4   6  13   24.66    1.97
   4   6  13   23.91    1.16
   4  -6  13   25.76    2.81
   4  -6  13   23.08    2.45
   4   6  13   25.39    2.76
  -4  -6 -13   24.91    2.69
  -4   6 -14  432.29   11.24
   4   6  14  446.45    8.25
   4  -6  14  436.14   11.68
   4  -6  14  438.87   10.91
   4   6  14  438.02   11.59
  -4  -6 -14  437.48   11.63
  -4   6 -15   19.30    2.48
   4  -6  15   20.46    2.45
   4  -6  15   23.35    2.73
   4   6  15   19.35    2.52
  -4  -6 -15   19.93    2.57
  -4   6 -16  408.64   11.54
   4  -6  16  402.75   11.12
   4   6  16  421.55   11.96
   4  -6  16  420.20   12.02
  -4  -6 -16  426.01   11.98
  -4   6 -17  110.46    6.21
   4  -6  17  117.52    6.16
   4   6  17  114.60    6.40
   4  -6  17  114.04    6.40
  -4  -6 -17  115.95    6.40
  -4   6 -18   24.08    2.96
   4   6  18   28.94    3.33
   4  -6  18   27.71    3.11
   4  -6  18   24.98    3.11
  -4  -6 -18   26.99    3.17
  -4   6 -19   98.71    6.19
   4   6  19  100.00    6.28
   4  -6  19   98.25    6.28
   4  -6  19   92.78    5.79
  -4  -6 -19   92.91    6.02
  -4   6 -20    6.21    1.69
   4  -6  20    5.19    1.51
   4   6  20    5.14    1.58
   4  -6  20    4.71    1.51
  -4  -6 -20    5.38    1.55
  -4   6 -21   58.44    5.00
   4  -6  21   60.76    5.14
   4  -6  21   58.16    4.91
   4   6  21   56.35    4.93
  -4  -6 -21   58.85    5.12
  -4   6 -22   -0.09    1.06
   4  -6  22    0.81    0.81
   4  -6  22    0.74    0.79
   4   6  22    0.39    0.53
  -4  -6 -22    3.22    1.30
  -4   6 -22   -0.49    0.97
  -4   6 -23    8.27    2.02
   4  -6  23    5.19    1.57
   4   6  23    4.84    1.58
   4  -6  23    5.61    1.79
  -4  -6 -23    6.77    1.94
  -4   6 -23    7.39    1.71
   4  -6  24    1.44    1.07
   4   6  24    0.33    0.97
  -4   6 -24   -0.53    1.07
  -4  -6 -24    1.04    0.99
   4  -6  25   28.17    3.68
  -4   8  27    8.23    2.06
   4  -8 -27    9.83    2.18
  -4  -8  26   25.35    3.50
  -4   8  26   26.39    3.52
   4  -8 -26   25.58    3.36
   4   8 -25    3.29    1.27
  -4  -8  25    2.87    1.11
  -4  -8  25    1.46    1.06
  -4   8  25    1.79    0.74
   4  -8 -25    0.81    0.74
   4   8 -24   83.60    6.32
  -4   8  24   78.46    5.65
  -4  -8  24   81.49    6.03
   4  -8 -24   77.39    5.66
   4   8 -23    7.05    1.85
  -4  -8  23    5.51    1.39
  -4   8  23    7.67    1.74
   4  -8 -23   10.10    2.16
   4   8 -22    0.19    0.65
  -4   8  22    0.60    0.49
  -4  -8  22    1.65    0.88
   4  -8 -22    0.97    0.93
   4   8 -21  110.46    6.79
  -4   8  21  112.24    6.44
  -4   8  21  115.92    6.37
  -4  -8  21  120.07    6.91
   4  -8 -21  108.56    6.23
   4   8 -20   58.62    4.82
  -4   8  20   61.36    4.66
  -4   8  20   59.01    4.50
  -4  -8  20   65.59    5.07
   4  -8 -20   63.40    4.70
   4   8 -19   70.55    5.19
  -4   8  19   73.20    5.00
  -4  -8  19   72.57    5.19
  -4   8  19   74.33    4.87
   4  -8 -19   71.06    4.82
  -4  -8  18  158.86    4.01
  -4   8  18  152.05    5.49
   4   8 -18  149.08    7.41
  -4   8  18  156.05    7.14
  -4   8  18  156.80    6.76
  -4   8  18  155.82    6.86
  -4  -8  18  159.78    7.56
   4  -8 -18  152.56    6.83
   4   8 -17  127.30    6.70
  -4   8  17  131.59    4.87
  -4  -8  17  136.24    3.98
  -4   8  17  132.67    6.46
  -4   8  17  136.68    6.25
  -4   8  17  137.56    6.30
  -4  -8  17  126.47    6.67
   4  -8 -17  137.13    6.33
  -4   8  16   20.11    1.81
   4   8 -16   19.95    2.59
  -4   8  16   22.17    2.60
  -4   8  16   19.11    2.32
  -4   8  16   19.12    2.29
  -4  -8  16   20.76    2.66
   4  -8 -16   22.22    2.50
  -4   8  15    6.53    1.00
   4   8 -15    5.19    1.30
  -4   8  15    4.77    1.20
  -4   8  15    5.63    1.37
  -4   8  15    6.19    1.04
  -4  -8  15    4.54    1.27
  -4   8  15    5.89    1.34
   4  -8 -15    5.75    1.30
  -4   8  14   50.10    2.64
   4   8 -14   45.00    3.76
  -4   8  14   50.53    2.66
  -4   8  14   45.88    3.57
  -4   8  14   50.16    3.75
  -4   8  14   43.08    3.29
  -4  -8  14   47.04    3.85
   4  -8 -14   42.35    3.31
  -4   8  13   37.28    2.16
   4   8 -13   35.98    3.29
  -4   8  13   40.22    2.25
  -4   8  13   36.05    3.15
  -4   8  13   36.19    3.10
  -4   8  13   35.43    2.92
  -4  -8  13   36.56    3.38
   4  -8 -13   35.68    2.89
   4  -8 -13   35.40    2.94
  -4   8  13   38.30    3.04
   4   8 -12  552.32   12.47
  -4   8  12  562.03    8.04
  -4   8  12  565.20   12.28
  -4   8  12  564.27   12.07
  -4   8  12  584.20    8.20
  -4   8  12  544.95   10.34
   4  -8 -12  564.88   11.17
  -4  -8  12  553.69   12.81
  -4   8  12  571.41   11.47
   4  -8 -12  542.59   11.26
   4   8 -11   12.02    1.83
  -4   8  11   12.97    1.18
  -4   8  11   14.57    2.02
  -4   8  11   10.56    1.65
  -4   8  11   13.18    1.16
  -4   8  11   12.75    1.62
  -4  -8  11   11.12    1.76
   4  -8 -11   11.31    1.57
  -4   8  11   12.81    1.74
   4  -8 -11   12.31    1.67
  -4   8  10  132.21    3.50
  -4  -8  10  137.24    6.03
  -4   8  10  141.67    3.73
   4   8 -10  132.95    5.91
  -4   8  10  135.92    5.89
  -4   8  10  135.06    5.24
  -4   8  10  131.61    5.63
   4  -8 -10  132.75    5.21
  -4  -8  10  128.92    6.09
   4  -8 -10  133.21    5.33
  -4   8  10  138.05    5.40
  -4  -8   9    4.06    1.04
  -4   8   9    3.41    0.55
   4   8  -9    3.20    0.95
  -4   8   9    3.91    0.95
  -4   8   9    4.50    1.11
  -4   8   9    3.82    1.04
   4  -8  -9    3.62    0.86
  -4  -8   9    4.93    1.20
   4  -8  -9    4.56    1.02
  -4   8   9    3.66    0.86
  -4  -8   8  656.93   12.60
  -4   8   8  651.00    7.39
   4   8  -8  624.42   12.28
  -4   8   8  636.10   12.77
  -4   8   8  620.86   11.52
   4  -8  -8  629.61   10.82
  -4  -8   8  640.93   13.25
  -4   8   8  629.25   11.12
   4  -8  -8  628.81   11.19
  -4   8   7   60.66    2.20
  -4  -8   7   63.77    3.87
   4   8  -7   54.98    3.59
  -4   8   7   59.04    3.89
  -4   8   7   58.09    3.55
   4  -8  -7   59.11    3.27
  -4  -8   7   54.96    3.85
  -4   8   7   54.66    3.22
   4  -8  -7   57.00    3.33
   4   8  -6  446.08   10.06
  -4   8   6  444.58    5.96
  -4  -8   6  471.62   10.26
  -4   8   6  466.28   10.22
  -4   8   6  453.26   10.73
   4  -8  -6  438.65    8.78
  -4  -8   6  446.84   11.00
   4  -8  -6  450.04   10.63
  -4   8   6  439.46    9.04
   4  -8  -6  438.69    9.15
   4   8  -5   20.23    2.08
  -4   8   5   18.54    1.21
  -4   8   5   24.31    2.39
  -4   8   5   18.68    2.15
   4  -8  -5   18.70    1.99
  -4  -8   5   16.66    1.86
   4  -8  -5   19.74    1.79
   4  -8  -5   20.64    2.18
   4   8  -5   18.58    2.16
  -4   8   5   16.92    1.69
  -4  -8   5   20.30    2.36
   4  -8  -5   19.84    1.90
   4   8  -4 1484.34   17.82
  -4   8   4 1454.70   11.05
   4  -8  -4 1479.72   18.23
  -4   8   4 1485.35   19.40
  -4   8   4 1426.92   18.12
  -4  -8   4 1493.98   17.66
   4  -8  -4 1412.20   15.55
  -4   8   4 1398.10   15.92
   4   8  -4 1458.01   19.18
  -4  -8   4 1381.02   19.21
   4  -8  -4 1415.29   18.67
  -4  -8   4 1418.14   18.89
   4  -8  -4 1413.59   16.13
   4   8  -3  107.37    4.77
  -4   8   3  104.20    3.08
   4  -8  -3  105.66    3.03
  -4   8   3  112.94    5.35
   4  -8  -3  103.15    4.80
  -4  -8   3   98.61    3.73
  -4   8   3  106.14    4.98
  -4  -8   3  103.27    4.59
   4  -8  -3   96.94    4.05
  -4   8   3   98.27    4.20
   4  -8  -3   98.75    4.93
  -4  -8   3  103.62    5.28
  -4  -8   3  105.29    5.12
   4   8  -3  105.64    5.14
   4  -8  -3  102.16    4.31
   4   8  -2  405.90    9.24
  -4   8   2  387.48    6.18
  -4  -8   2  399.60    8.94
   4  -8  -2  387.72    6.10
   4  -8  -2  391.33    9.41
  -4   8   2  394.30    9.98
  -4   8   2  397.17    9.73
  -4  -8   2  381.64    7.25
   4  -8  -2  391.01    8.11
  -4   8   2  378.35    8.25
   4  -8  -2  384.38    9.76
  -4  -8   2  389.36    9.83
  -4  -8   2  391.49   10.24
   4   8  -2  400.51    9.99
   4  -8  -2  383.91    8.39
  -4   8   1    5.59    0.77
   4   8  -1    5.49    1.09
   4  -8  -1    5.38    0.77
  -4   8   1    5.31    1.14
  -4  -8   1    5.88    1.07
  -4   8   1    6.09    1.23
  -4  -8   1    6.77    0.99
   4  -8  -1    4.35    0.91
  -4  -8   1    5.37    1.18
  -4   8   1    4.93    0.88
   4   8  -1    3.73    0.84
  -4  -8   1    4.57    1.09
  -4  -8   1    4.40    1.09
   4  -8  -1    6.51    1.28
   4  -8   0   89.69    3.25
  -4   8   0   93.63    3.31
   4   8   0   98.68    4.45
  -4   8   0  100.93    5.00
  -4   8   0   97.80    5.01
  -4  -8   0   96.27    4.31
   4  -8   0   92.89    4.63
   4  -8   0   96.57    4.94
  -4  -8   0  100.65    4.94
   4   8   0   96.34    4.87
  -4  -8   0   92.75    4.82
  -4   8   0   92.77    4.12
   4  -8   1  141.60    4.28
   4   8   1  142.99    5.37
  -4   8  -1  143.63    4.31
   4   8   1  138.45    5.63
  -4   8  -1  145.79    6.10
   4  -8   1  138.81    5.70
  -4  -8  -1  144.80    5.95
   4  -8   1  135.55    5.89
   4   8   1  145.61    6.03
  -4   8  -1  141.20    5.17
  -4  -8  -1  140.39    5.98
  -4   8  -2    4.13    0.79
   4   8   2    3.87    0.95
   4  -8   2    3.50    0.72
  -4   8  -2    3.20    0.58
   4   8   2    2.52    0.90
   4  -8   2    3.43    1.00
  -4  -8  -2    2.71    0.91
   4   8   2    2.36    0.81
  -4  -8  -2    3.15    0.77
  -4   8  -2    3.03    0.77
   4  -8   3   40.43    2.53
   4   8   3   39.18    2.83
  -4   8  -3   38.00    2.41
   4   8   3   38.91    2.99
  -4   8  -3   39.50    3.20
   4  -8   3   38.28    3.18
  -4   8  -3   38.00    2.76
   4  -8   3   40.25    2.69
  -4  -8  -3   40.41    3.27
  -4   8  -4   93.80    3.98
   4  -8   4   97.67    4.15
   4   8   4   94.70    4.40
  -4   8  -4   97.45    5.07
   4   8   4   96.04    4.63
   4  -8   4   93.22    5.03
  -4  -8  -4   92.57    4.93
   4  -8   4   93.22    4.01
  -4   8  -4   94.84    4.47
   4  -8   5  108.07    4.47
  -4   8  -5  106.56    4.36
   4   8   5  108.79    4.73
   4   8   5  108.04    4.91
  -4   8  -5   99.59    5.19
   4  -8   5  100.72    5.26
  -4  -8  -5  109.71    5.42
   4  -8   5  103.09    4.10
  -4   8  -5  104.32    4.79
  -4   8  -6   12.12    1.53
   4  -8   6   11.26    1.53
   4   8   6   12.63    1.65
  -4   8  -6   10.20    1.64
   4   8   6   11.28    1.46
   4   8   6   11.47    1.62
   4  -8   6   11.24    1.85
  -4  -8  -6   13.88    1.95
  -4   8  -6   11.72    1.67
   4  -8   6    9.22    1.20
  -4   8  -7    1.50    0.56
   4  -8   7    1.83    0.65
   4   8   7    3.08    0.84
   4   8   7    2.85    0.70
   4   8   7    2.74    0.88
   4   8   7    2.46    0.70
  -4   8  -7    2.22    1.04
   4  -8   7    2.20    0.70
  -4   8  -7    2.06    0.77
  -4  -8  -7    3.15    0.86
   4  -8   7    2.43    0.56
  -4   8  -8  196.39    6.61
   4  -8   8  200.56    6.88
   4   8   8  204.94    5.79
   4   8   8  201.65    6.72
   4   8   8  194.91    5.95
   4   8   8  204.04    6.67
   4  -8   8  198.96    7.72
  -4  -8  -8  203.39    7.71
  -4   8  -8  206.75    7.16
   4  -8   8  205.46    5.12
  -4   8  -9   13.92    1.83
   4  -8   9   13.92    1.86
   4   8   9   11.14    1.62
   4   8   9   12.95    1.53
   4   8   9   11.58    1.62
   4   8   9   14.29    1.55
   4  -8   9   13.69    2.11
  -4  -8  -9   14.13    2.08
   4  -8   9   11.73    1.16
  -4   8 -10  334.28    9.20
   4  -8  10  342.14    5.74
   4   8  10  329.70    8.51
   4   8  10  334.05    7.90
   4   8  10  344.22    9.10
   4   8  10  325.87    7.23
   4  -8  10  340.73   10.40
  -4  -8 -10  335.51   10.22
  -4   8 -11   21.34    2.43
   4  -8  11   20.50    1.25
   4   8  11   20.53    1.79
   4   8  11   21.48    2.34
   4   8  11   21.11    2.20
   4   8  11   23.49    2.18
   4   8  11   21.94    2.64
   4  -8  11   20.95    2.69
  -4  -8 -11   20.16    2.62
   4  -8  12 1056.02    6.61
  -4   8 -12 1059.83   17.40
   4   8  12 1057.12   15.24
   4   8  12 1062.00   16.61
   4   8  12 1039.28   11.98
   4   8  12 1088.00   15.18
   4   8  12 1067.54   18.70
   4  -8  12 1059.06   19.11
  -4  -8 -12 1045.58   18.67
  -4   8 -13    1.94    0.74
   4   8  13    0.83    0.32
   4   8  13    2.85    0.79
   4   8  13    1.57    0.77
   4   8  13    1.07    0.40
   4  -8  13   -0.26    0.69
   4   8  13    0.09    0.62
  -4  -8 -13    1.18    0.79
  -4   8 -14  235.02    8.69
   4   8  14  238.86    7.58
   4   8  14  255.09    7.48
   4   8  14  240.07    8.30
   4   8  14  244.54    9.36
   4  -8  14  250.64    9.64
  -4  -8 -14  239.56    9.29
  -4   8 -15   91.11    5.61
   4   8  15  100.81    4.70
   4  -8  15   96.97    6.10
   4  -8  15   89.14    5.45
   4   8  15   99.31    6.12
  -4  -8 -15   96.11    6.00
  -4   8 -16  179.36    8.00
   4   8  16  189.67    6.39
   4   8  16  178.04    8.32
   4  -8  16  178.97    8.50
   4  -8  16  167.71    7.62
  -4  -8 -16  179.13    8.32
  -4   8 -17    5.77    1.46
   4  -8  17    5.15    1.37
   4   8  17    6.54    1.60
   4  -8  17    7.37    1.69
  -4  -8 -17    5.84    1.46
  -4   8 -18    7.71    1.85
   4  -8  18    9.25    2.06
   4  -8  18    9.73    2.06
   4   8  18    6.58    1.48
  -4  -8 -18    8.94    1.94
  -4   8 -19   19.02    2.89
   4  -8  19   19.63    3.11
   4  -8  19   18.26    2.73
   4   8  19   20.18    3.04
  -4  -8 -19   14.30    2.50
  -4   8 -20   64.78    5.33
   4  -8  20   65.57    5.28
   4   8  20   68.80    5.63
   4  -8  20   66.76    5.56
  -4  -8 -20   63.10    5.47
  -4   8 -21    4.33    1.53
   4  -8  21    3.27    1.37
   4   8  21    7.56    2.11
   4  -8  21    2.76    1.13
  -4  -8 -21    1.85    1.18
  -4   8 -22   51.74    5.00
   4  -8  22   57.46    5.19
   4  -8  23    1.86    1.28
  -4  10  25   28.32    3.69
  -4  10  25   26.07    3.55
   4 -10 -25   28.89    3.66
  -4  10  24   46.62    4.66
  -4  10  24   47.10    4.63
   4 -10 -24   42.87    4.47
   4  10 -23    0.05    0.76
  -4  10  23   -0.81    1.13
  -4  10  23    0.04    0.84
   4 -10 -23    0.33    0.56
   4  10 -22   79.08    6.21
  -4  10  22   83.48    6.02
  -4 -10  22   86.20    6.47
  -4  10  22   88.33    6.09
   4 -10 -22   79.01    5.81
   4  10 -21   52.76    5.10
  -4  10  21   52.27    4.71
  -4  10  21   52.25    4.64
  -4 -10  21   53.68    5.10
   4 -10 -21   45.95    4.35
   4  10 -20    8.64    2.08
  -4  10  20    7.27    1.72
  -4  10  20    8.22    1.79
  -4 -10  20   12.54    2.50
   4 -10 -20    7.92    1.90
   4  10 -19    8.87    2.01
  -4  10  19   11.65    2.08
  -4  10  19    8.02    1.81
  -4 -10  19    7.67    1.78
   4 -10 -19    9.66    1.95
   4  10 -18   40.41    4.08
  -4  10  18   44.30    4.01
  -4  10  18   47.10    4.19
  -4 -10  18   46.00    4.49
   4 -10 -18   40.18    3.85
   4  10 -17    2.04    0.83
  -4  10  17    3.11    0.99
  -4  10  17    3.31    1.11
  -4 -10  17    3.73    1.27
   4 -10 -17    3.47    1.25
   4  10 -16    4.42    1.37
  -4  10  16    5.42    1.53
  -4  10  16    6.00    1.60
  -4 -10  16    3.87    1.39
   4 -10 -16    5.68    1.48
   4  10 -15   39.85    3.89
  -4  10  15   41.69    3.89
  -4  10  15   38.16    3.57
  -4 -10  15   36.54    3.87
   4 -10 -15   36.42    3.43
   4  10 -14   70.65    5.07
  -4  10  14   81.40    3.41
  -4  10  14   72.64    4.86
  -4  10  14   76.48    5.15
  -4 -10  14   73.84    5.37
   4 -10 -14   71.65    4.71
  -4  10  13    9.61    1.11
   4  10 -13    8.73    1.76
  -4  10  13    8.30    1.64
  -4  10  13   10.52    1.97
  -4 -10  13    8.71    1.85
   4 -10 -13    8.25    1.62
   4  10 -12   64.27    4.64
  -4  10  12   68.26    2.89
  -4  10  12   61.01    4.57
  -4 -10  12   62.12    4.80
   4 -10 -12   58.85    4.13
  -4  10  11    8.83    1.02
   4  10 -11    9.20    1.78
  -4  10  11    8.11    1.67
  -4 -10  11    7.71    1.65
   4 -10 -11    4.71    1.21
  -4  10  10  395.96    6.39
  -4  10  10  412.74    6.74
   4  10 -10  375.18   10.77
  -4  10  10  382.06   11.21
  -4 -10  10  373.97   11.70
   4 -10 -10  376.75   10.19
  -4  10   9  108.16    3.36
   4  10  -9  100.35    5.49
  -4  10   9  105.47    5.91
  -4 -10   9   99.66    5.98
   4 -10  -9  101.14    5.23
   4 -10  -9   93.28    5.61
  -4  10   8  531.79    7.37
   4  10  -8  494.34   11.95
  -4  10   8  504.15   12.88
   4 -10  -8  475.44   10.70
  -4 -10   8  481.74   13.04
   4 -10  -8  488.21   12.79
   4 -10  -8  491.34   11.31
  -4  10   7    1.04    0.21
   4  10  -7    2.22    0.81
  -4  10   7    2.13    0.91
   4 -10  -7    1.07    0.35
  -4  10   7    0.39    0.51
   4 -10  -7    1.09    0.72
   4 -10  -7    1.00    0.37
  -4 -10   7    2.57    1.06
   4  10  -6  456.95   11.17
  -4  10   6  456.18    6.88
  -4  10   6  449.63   12.17
  -4 -10   6  443.60   12.47
   4 -10  -6  442.53   10.08
  -4  10   6  437.93   10.38
   4 -10  -6  435.45   11.91
   4 -10  -6  438.27   10.56
   4  10  -5   25.42    2.62
  -4  10   5   26.25    1.67
  -4 -10   5   22.98    2.16
  -4  10   5   24.14    2.81
   4 -10  -5   22.31    2.29
  -4  10   5   24.07    2.39
   4 -10  -5   27.02    2.96
  -4 -10   5   21.74    2.71
   4 -10  -5   25.77    2.53
  -4  10   4  404.24    6.74
   4  10  -4  413.09   10.40
  -4 -10   4  375.76    8.60
  -4 -10   4  394.09    9.99
  -4  10   4  398.95   11.38
   4 -10  -4  379.81    9.29
  -4 -10   4  394.11   11.65
  -4  10   4  394.07    9.75
   4 -10  -4  388.43    9.78
   4 -10  -4  384.56   11.12
  -4  10   3    1.58    0.35
   4  10  -3    2.02    0.67
  -4 -10   3    0.77    0.28
  -4  10   3    3.45    1.16
  -4 -10   3    1.97    0.74
   4 -10  -3    0.77    0.53
  -4 -10   3    0.07    0.83
   4 -10  -3    1.07    0.70
  -4  10   3    1.48    0.55
   4 -10  -3    0.77    0.49
  -4 -10   3   -0.48    0.69
   4  10  -2   76.42    4.40
  -4  10   2   81.96    3.25
   4 -10  -2   75.42    3.06
  -4  10   2   77.44    5.01
  -4 -10   2   73.10    3.68
  -4 -10   2   78.39    4.33
   4 -10  -2   73.54    4.06
  -4  10   2   76.55    4.28
   4 -10  -2   73.77    4.91
  -4 -10   2   73.27    4.82
  -4 -10   2   81.38    5.28
   4  10  -1   92.48    4.80
  -4  10   1   94.79    3.62
  -4  10   1   95.19    5.61
  -4 -10   1   91.87    4.70
   4 -10  -1   93.63    3.55
  -4 -10   1   89.65    4.01
   4  10  -1  107.53    5.81
   4 -10  -1   90.71    5.42
   4 -10  -1   91.82    4.56
  -4 -10   1   90.29    5.59
  -4 -10   1   89.63    5.37
  -4  10   1   89.23    4.64
   4 -10   0    6.54    1.04
   4  10   0    5.88    1.23
  -4  10   0    4.43    1.06
  -4  10   0    6.58    1.00
   4  10   0    6.74    1.37
  -4  10   0    5.63    1.25
   4 -10   0    5.89    1.44
  -4 -10   0    6.58    1.41
  -4 -10   0    5.28    1.43
   4  10   1  119.89    5.45
  -4  10  -1  122.16    4.43
   4  10   1  116.32    6.00
  -4  10  -1  120.90    6.37
   4 -10   1  116.22    4.29
   4 -10   1  110.53    6.03
  -4  10  -1  112.54    5.33
  -4 -10  -1  119.93    6.47
  -4 -10  -1  115.88    6.14
  -4  10  -2    0.62    0.48
   4  10   2   -0.67    0.93
   4 -10   2   -0.40    0.42
  -4  10  -2   -0.49    0.99
   4 -10   2    1.09    0.77
  -4  10  -2   -0.12    0.48
  -4 -10  -2    0.33    0.49
  -4  10  -3   13.18    1.55
   4 -10   3   14.51    1.67
   4  10   3   11.12    1.74
   4  10   3   11.28    1.88
  -4  10  -3   13.86    2.16
   4 -10   3   13.97    2.22
  -4 -10  -3   11.58    1.95
   4 -10   3   11.77    1.67
   4 -10   4   14.37    1.76
  -4  10  -4   13.60    1.65
   4  10   4   14.00    1.90
   4  10   4   11.58    1.79
  -4  10  -4   17.24    2.39
   4 -10   4   12.31    2.09
   4 -10   4   14.27    1.81
  -4 -10  -4   15.76    2.32
   4  10   5    7.72    1.43
   4 -10   5    7.71    1.35
  -4  10  -5    9.41    1.43
   4  10   5    9.41    1.64
  -4  10  -5    7.83    1.69
   4 -10   5    7.11    1.65
  -4 -10  -5    9.80    1.86
   4 -10   5    6.86    1.23
  -4  10  -6  154.39    5.91
   4 -10   6  151.63    5.96
   4  10   6  156.98    6.32
   4  10   6  148.94    6.63
  -4  10  -6  152.16    7.30
   4 -10   6  151.74    7.39
  -4 -10  -6  149.87    7.16
   4 -10   6  154.23    5.72
  -4  10  -7    0.05    0.42
   4 -10   7    0.21    0.51
   4  10   7   -0.12    0.48
  -4  10  -7    0.56    0.67
   4  10   7   -0.86    0.67
   4 -10   7   -0.91    0.99
   4 -10   7   -0.46    0.49
  -4 -10  -7   -0.32    0.58
   4  10   8  175.61    6.84
  -4  10  -8  172.50    6.65
  -4  10  -8  175.73    7.97
   4  10   8  172.95    6.46
   4  10   8  171.44    7.05
   4 -10   8  164.95    7.90
   4 -10   8  168.55    5.58
  -4 -10  -8  166.55    7.72
  -4  10  -9   81.81    4.73
   4  10   9   85.96    4.49
   4  10   9   90.62    4.94
  -4  10  -9   95.35    5.95
   4  10   9   89.56    5.17
   4 -10   9   78.81    5.52
  -4 -10  -9   85.55    5.61
  -4  10 -10  250.48    8.51
   4  10  10  260.05    8.48
  -4  10 -10  264.28    9.94
   4  10  10  260.95    8.71
   4 -10  10  258.45   10.06
  -4 -10 -10  250.59    9.71
  -4  10 -11    2.62    1.02
   4  10  11    2.15    0.69
   4  10  11    1.51    0.55
  -4  10 -11    3.01    0.99
   4  10  11    2.52    0.86
   4 -10  11    2.66    1.06
  -4 -10 -11    3.76    1.30
  -4  10 -12  141.50    6.77
   4  10  12  132.53    6.23
   4  10  12  143.64    5.79
   4  10  12  142.13    6.46
  -4  10 -12  147.18    7.49
   4 -10  12  138.14    7.56
  -4 -10 -12  143.08    7.56
  -4  10 -13    2.08    0.97
   4  10  13    1.83    0.76
   4  10  13    3.71    1.09
   4  10  13    2.38    0.86
  -4  10 -13    1.95    0.97
   4 -10  13    1.69    0.81
  -4 -10 -13    2.02    0.53
  -4  10 -14  122.73    6.63
   4  10  14  133.07    6.23
   4  10  14  126.03    5.72
   4  10  14  117.11    6.10
  -4  10 -14  124.15    7.07
   4 -10  14  123.61    7.39
  -4 -10 -14  124.78    7.27
  -4  10 -15   16.06    2.48
  -4  10 -15   15.48    2.59
   4  10  15   15.83    2.22
   4  10  15   18.03    2.46
   4  10  15   19.25    2.29
   4 -10  15   15.11    2.64
  -4 -10 -15   12.74    2.43
  -4  10 -16   64.95    5.07
   4  10  16   74.21    5.07
   4  10  16   78.02    4.71
   4  10  16   80.17    4.80
  -4  10 -16   71.13    5.44
   4 -10  16   77.37    6.07
  -4 -10 -16   79.64    6.05
  -4  10 -17    1.79    1.13
  -4  10 -17    2.52    1.32
   4  10  17    1.55    0.90
   4 -10  17    1.83    1.06
   4 -10  17    0.30    0.55
  -4 -10 -17    0.60    0.69
  -4  10 -18   93.49    6.49
  -4  10 -18  104.87    6.69
   4  10  18   94.72    5.89
   4 -10  18   89.34    6.23
  -4 -10 -18   94.05    6.72
  -4  10 -19    0.60    0.62
   4 -10  19    1.23    0.91
  -4  10 -19    2.13    0.93
   4  10  19    0.84    0.58
  -4  10 -20   40.13    4.38
   4  10  20   40.85    4.03
  -4  10 -20   43.86    4.54
   4 -10  20   40.34    4.40
  -4  10 -21   24.74    3.45
   4 -10  21   21.02    3.27
  -4  10 -22    3.99    1.67
  -4  12  21    3.59    1.39
   4 -12 -21    4.87    1.60
  -4  12  20   15.15    2.64
  -4  12  20   12.58    2.38
   4 -12 -20   13.05    2.46
  -4  12  19   28.85    3.64
  -4  12  19   28.29    3.43
   4  12 -19   28.71    3.73
   4 -12 -19   25.44    3.33
  -4  12  18    1.39    0.93
   4  12 -18    1.60    0.88
   4 -12 -18    1.58    0.93
  -4  12  17    6.30    1.60
   4  12 -17    8.71    2.02
   4 -12 -17    5.91    1.64
   4  12 -16   11.38    2.30
  -4  12  16   10.45    2.13
  -4 -12  16    9.20    2.22
   4 -12 -16   10.45    2.15
   4  12 -15    1.44    0.97
  -4  12  15    2.67    1.04
  -4 -12  15    1.76    1.06
   4 -12 -15    2.53    1.07
   4  12 -14   76.76    5.66
  -4  12  14   94.30    6.37
  -4 -12  14   89.04    6.51
   4 -12 -14   78.34    5.49
   4  12 -13    3.13    1.13
  -4  12  13    2.27    1.14
  -4 -12  13    0.14    0.70
   4 -12 -13    1.86    0.84
   4  12 -12    8.39    1.88
  -4  12  12   10.77    2.16
  -4 -12  12   10.85    2.29
   4 -12 -12    7.90    1.76
   4 -12 -12    9.52    1.88
   4  12 -11    6.77    1.65
  -4  12  11    7.99    1.88
  -4 -12  11    6.72    1.86
   4 -12 -11    6.51    1.57
   4 -12 -11    7.78    1.90
   4  12 -10   97.87    5.96
  -4  12  10  109.07    6.76
  -4 -12  10  101.62    6.77
   4 -12 -10   97.52    6.49
   4 -12 -10   96.04    5.77
   4  12  -9    7.55    1.55
  -4  12   9    8.44    1.99
  -4 -12   9    6.56    1.62
   4 -12  -9    7.44    1.62
   4 -12  -9    6.02    1.65
   4  12  -8  131.94    6.76
  -4  12   8  136.96    7.53
  -4 -12   8  132.24    7.69
   4 -12  -8  128.76    7.35
   4 -12  -8  125.33    6.46
   4  12  -7    5.84    1.35
  -4  12   7    5.00    1.39
  -4 -12   7    4.66    1.44
   4 -12  -7    3.73    1.21
   4 -12  -7    3.45    0.97
   4  12  -6  195.86    7.97
  -4  12   6  191.39    8.99
  -4 -12   6  183.30    9.01
   4 -12  -6  184.23    8.78
   4 -12  -6  176.67    7.62
   4  12  -5   25.76    2.87
   4  12  -5   26.05    3.29
  -4  12   5   28.15    3.40
  -4 -12   5   24.47    3.25
   4 -12  -5   26.71    3.34
   4 -12  -5   26.90    2.96
  -4  12   4   50.68    4.59
   4  12  -4   50.42    4.50
   4  12  -4   46.37    3.82
   4 -12  -4   42.26    4.20
  -4 -12   4   46.74    4.54
   4  12  -3   24.65    3.17
  -4  12   3   25.69    3.24
   4  12  -3   25.84    2.81
  -4 -12   3   21.39    3.01
   4 -12  -3   25.44    3.27
   4  12  -2   85.54    5.10
   4  12  -2   86.31    5.93
  -4  12   2   86.50    6.09
   4 -12  -2   78.74    5.74
  -4 -12   2   77.69    5.82
   4  12  -1    0.07    0.63
  -4  12   1    0.48    0.62
   4  12  -1    0.44    0.70
  -4 -12   1    0.19    0.58
   4 -12  -1    0.21    0.69
  -4 -12   1    0.32    0.70
   4  12   0    4.68    1.27
   4  12   0    3.87    1.25
  -4  12   0    2.39    0.91
   4 -12   0    2.30    0.88
  -4 -12   0    3.54    1.18
  -4 -12   0    5.33    1.71
  -4  12  -1    0.23    0.42
   4  12   1   -0.28    0.49
   4  12   1   -0.30    0.86
  -4  12  -1    0.05    0.62
   4 -12   1   -1.53    1.16
  -4 -12  -1   -0.65    0.76
  -4 -12  -1   -0.88    0.90
  -4  12  -2   30.05    2.43
   4  12   2   33.16    3.13
  -4  12  -2   27.78    3.40
   4  12   2   30.88    3.47
   4 -12   2   29.82    3.50
  -4 -12  -2   31.35    3.55
  -4 -12  -2   29.17    3.61
  -4  12  -3   40.90    2.94
   4  12   3   46.43    3.71
  -4  12  -3   49.28    4.57
   4  12   3   42.66    4.06
   4 -12   3   43.61    4.36
  -4 -12  -3   41.33    4.35
  -4 -12  -3   43.37    4.22
  -4  12  -4    1.95    0.72
   4  12   4    1.94    0.84
   4  12   4    0.42    0.91
  -4  12  -4    0.90    0.97
   4 -12   4    4.79    1.85
  -4 -12  -4    3.64    1.48
  -4 -12  -4    2.60    1.20
  -4  12  -5   84.51    4.54
   4  12   5   88.00    5.14
  -4  12  -5   82.76    6.05
   4  12   5   81.93    5.58
   4 -12   5   83.51    6.03
  -4 -12  -5   82.09    5.89
  -4 -12  -5   80.28    6.09
   4  12   6  133.23    6.28
  -4  12  -6  129.90    5.79
  -4  12  -6  134.57    7.72
   4  12   6  122.60    6.83
   4 -12   6  118.47    7.28
  -4 -12  -6  116.15    6.98
  -4  12  -7   60.41    4.08
   4  12   7   59.04    4.22
  -4  12  -7   60.50    5.21
   4  12   7   58.20    4.68
   4 -12   7   59.52    5.17
  -4 -12  -7   58.18    4.94
  -4  12  -8   18.79    2.30
   4  12   8   20.18    2.50
   4  12   8   15.52    2.41
  -4  12  -8   18.23    2.97
   4 -12   8   18.42    2.99
  -4 -12  -8   16.87    2.76
   4  12   9    0.44    0.60
  -4  12  -9    0.32    0.42
   4  12   9   -0.37    0.76
  -4  12  -9    1.09    1.00
   4 -12   9    0.86    0.95
  -4 -12  -9    0.95    0.62
  -4  12 -10   69.77    4.75
   4  12  10   71.73    4.73
   4  12  10   67.96    5.03
  -4  12 -10   74.96    5.95
   4 -12  10   68.29    5.72
  -4 -12 -10   65.62    5.47
  -4  12 -11    1.34    0.62
   4  12  11    0.83    0.62
  -4  12 -11    2.48    1.23
   4  12  11    3.64    1.30
   4 -12  11    3.06    1.20
  -4 -12 -11    3.61    1.32
  -4  12 -12   64.25    4.73
   4  12  12   64.30    4.93
  -4  12 -12   70.28    5.77
   4 -12  12   70.48    6.00
  -4 -12 -12   62.59    5.47
   4  12  13    4.22    1.28
  -4  12 -13    2.60    1.13
  -4  12 -13    3.91    1.23
  -4 -12 -13    4.17    1.23
  -4  12 -14  116.48    7.58
   4  12  14  113.93    6.46
  -4  12 -14  109.29    6.54
  -4 -12 -14  113.56    7.53
  -4  12 -15    3.45    1.30
  -4  12 -16   31.35    3.76
  -4  12 -17    8.99    2.18
   4  14 -14    8.09    2.02
   4 -14 -14    7.71    2.06
   4  14 -13   15.48    2.71
   4 -14 -13   13.16    2.41
   4  14 -12   54.24    4.91
   4 -14 -12   55.29    4.91
   4  14 -11   15.24    2.64
   4 -14 -11   13.78    2.55
   4  14 -10   90.16    6.12
   4 -14 -10   81.17    5.84
   4  14  -9    5.14    1.46
   4 -14  -9    6.25    1.53
   4  14  -8   74.91    5.44
   4 -14  -8   64.95    5.15
   4  14  -7   13.12    2.29
   4 -14  -7   16.84    2.81
   4 -14  -7   10.45    1.92
   4  14  -6   27.69    3.24
   4 -14  -6   27.22    3.75
   4 -14  -5   -1.16    1.20
   4 -14  -4   81.89    6.53
   4 -14  -3   10.22    2.32
   4 -14  -2   44.25    4.82
   4  14  -1   39.13    4.40
   4 -14  -1   29.10    3.91
   4  14   0   20.69    3.20
   4  14   1   58.88    5.35
  -4 -14  -1   52.41    5.14
   4  14   2    0.21    0.62
  -4 -14  -2   -0.79    0.56
   4  14   3   34.90    4.10
  -4 -14  -3   30.00    3.91
   4  14   4   17.40    2.97
  -4 -14  -4   17.94    3.04
   4  14   5   -0.14    0.69
  -4 -14  -5   -0.70    1.34
   4  14   6    0.46    1.07
   4  14   7    9.20    2.15
   4  14   8   27.71    3.57
   4  14   9    9.20    2.16
   4  14  10   74.03    5.89
   4  14  11    6.26    1.90
   5   1 -31    9.34    2.15
  -5  -1  31   11.91    2.52
  -5   1  31   15.34    2.80
   5  -1 -31   15.34    2.73
   5   1 -31   12.10    2.52
   5   1 -30   71.78    5.81
  -5  -1  30   75.09    5.89
  -5   1  30   70.11    5.66
   5  -1 -30   68.03    5.56
   5   1 -30   70.51    5.68
   5   1 -29   21.20    3.04
  -5  -1  29   27.29    3.50
  -5   1  29   24.95    3.34
   5  -1 -29   26.60    3.38
   5   1 -29   19.95    2.97
   5   1 -28  163.58    8.25
  -5   1  28  166.55    8.25
  -5  -1  28  166.80    8.41
   5   1 -28  156.22    8.11
   5  -1 -28  158.05    8.00
   5  -1 -27   -0.79    0.99
   5   1 -27   -1.09    1.06
  -5  -1  27    0.51    0.51
  -5   1  27   -1.34    1.04
   5   1 -27    0.09    0.53
   5  -1 -27   -0.84    0.97
   5  -1 -26    3.89    1.32
   5   1 -26    5.08    1.39
  -5   1  26    4.63    1.23
  -5  -1  26    4.73    1.58
   5   1 -26    4.03    1.04
   5  -1 -26    3.76    1.13
   5   1 -25    6.18    1.04
   5  -1 -25    5.26    1.41
   5  -1 -25    6.69    1.27
   5   1 -25    5.21    1.37
  -5  -1  25    9.29    1.97
  -5   1  25    7.56    1.60
   5   1 -25    4.63    1.25
   5  -1 -25    5.61    1.46
   5   1 -24    0.48    0.42
   5  -1 -24    0.56    0.49
   5   1 -24   -0.25    0.72
   5  -1 -24   -0.62    0.76
  -5   1  24   -1.21    0.81
  -5  -1  24    0.18    0.58
   5   1 -24   -0.62    0.95
   5  -1 -24    0.77    0.67
   5   1 -23    4.91    1.25
   5   1 -23    4.68    0.90
   5  -1 -23    5.98    1.14
   5  -1 -23    6.00    1.35
   5  -1 -23    5.58    1.11
  -5  -1  23    5.88    1.35
  -5   1  23    4.40    1.14
   5   1 -23    3.66    0.97
   5  -1 -23    5.10    1.16
   5  -1 -22   56.58    3.33
   5  -1 -22   59.15    4.05
   5   1 -22   53.99    2.94
   5   1 -22   60.64    4.26
  -5   1  22   58.53    4.12
  -5  -1  22   60.01    4.24
   5   1 -22   60.13    4.17
   5  -1 -22   58.95    4.12
   5  -1 -21   74.08    4.38
   5  -1 -21   78.09    3.85
   5   1 -21   79.68    4.75
   5   1 -21   66.59    3.27
  -5   1  21   78.64    4.59
  -5  -1  21   77.21    4.66
   5   1 -21   83.42    4.49
   5  -1 -21   79.22    4.29
   5  -1 -21   73.82    4.45
   5   1 -20  185.41    7.04
   5  -1 -20  180.69    5.75
  -5   1  20  194.38    7.02
   5   1 -20  179.53    5.00
   5  -1 -20  182.08    6.63
  -5   1  20  178.28    6.69
  -5  -1  20  190.55    7.05
   5   1 -20  197.37    6.69
   5  -1 -20  190.51    6.44
   5  -1 -20  185.99    6.74
  -5  -1  19   93.47    4.94
   5   1 -19   88.00    3.40
   5  -1 -19   87.08    4.43
  -5   1  19   89.85    4.63
   5  -1 -19   88.23    3.91
   5   1 -19   88.14    4.71
  -5   1  19   89.67    4.57
  -5  -1  19   86.85    4.66
   5   1 -19   93.42    4.45
   5  -1 -19   92.70    4.33
   5  -1 -19   88.30    4.47
   5  -1 -18  547.54   10.68
   5  -1 -18  544.35    9.54
  -5   1  18  557.55   11.08
   5   1 -18  544.35    8.27
  -5  -1  18  583.18   11.96
   5   1 -18  544.18   11.33
   5   1 -18  567.29   10.52
  -5   1  18  547.71   10.89
  -5  -1  18  555.28   11.38
   5  -1 -18  568.51   10.26
   5  -1 -18  551.56   10.82
   5  -1 -17   19.63    1.97
   5  -1 -17   17.65    1.69
   5   1 -17   19.28    2.04
  -5   1  17   20.60    2.06
   5   1 -17   20.43    1.58
  -5  -1  17   19.84    2.11
  -5  -1  17   20.28    2.08
  -5   1  17   21.36    2.11
   5   1 -17   19.69    1.88
   5  -1 -17   21.46    1.92
   5  -1 -17   22.47    2.13
   5  -1 -16 1278.02   15.16
   5   1 -16 1280.25   16.17
   5   1 -16 1253.21   12.00
  -5  -1  16 1327.24   16.73
   5  -1 -16 1266.53   13.99
  -5   1  16 1310.44   15.59
  -5   1  16 1259.97   15.22
  -5  -1  16 1221.19   14.14
  -5  -1  16 1266.00   15.92
   5   1 -16 1296.26   14.71
   5  -1 -16 1255.29   14.21
  -5  -1  16 1242.87   12.16
   5  -1 -16 1269.77   15.18
  -5  -1  15  168.73    5.74
   5  -1 -15  165.46    5.23
   5  -1 -15  165.04    4.89
   5   1 -15  166.69    5.63
  -5   1  15  164.35    5.30
   5   1 -15  159.25    4.17
  -5   1  15  163.15    5.24
   5   1 -15  162.52    4.94
  -5  -1  15  157.19    5.44
  -5  -1  15  160.52    4.93
   5  -1 -15  157.91    4.80
  -5  -1  15  161.57    4.29
   5  -1 -15  163.68    5.23
   5  -1 -14 3214.95   20.95
  -5   1  14 3193.43   22.31
   5   1 -14 3138.12   18.17
   5   1 -14 3141.27   23.57
   5  -1 -14 3238.01   22.11
  -5  -1  14 3285.90   24.40
   5   1 -14 3230.29   21.09
  -5   1  14 3157.54   22.24
  -5  -1  14 3116.45   20.67
   5  -1 -14 3091.04   20.28
   5  -1 -14 3167.13   22.06
  -5  -1  14 3179.64   18.40
   5   1 -13  515.60    7.21
   5  -1 -13  564.58    8.80
   5  -1 -13  546.36    8.53
  -5  -1  13  561.79    9.76
   5   1 -13  555.72    9.55
  -5   1  13  562.01    8.88
   5   1 -13  554.80    8.30
  -5   1  13  560.52    8.90
  -5  -1  13  552.92    8.23
   5  -1 -13  550.72    7.97
   5  -1 -13  550.74    8.73
  -5  -1  13  554.45    7.55
  -5  -1  12 3112.95   22.04
   5   1 -12 3118.84   21.73
   5  -1 -12 3129.87   19.62
  -5  -1  12 3112.51   17.38
  -5   1  12 3090.67   19.83
   5  -1 -12 3175.75   19.79
   5   1 -12 3056.97   17.10
  -5   1  12 3190.99   20.14
   5   1 -12 3137.54   18.74
  -5  -1  12 3106.00   18.49
   5  -1 -12 3127.83   17.80
  -5   1  12 3149.06   19.79
   5  -1 -12 3148.20   19.60
  -5   1  11   88.67    3.20
   5   1 -11   91.73    3.62
  -5  -1  11   91.76    2.92
   5  -1 -11   93.66    3.20
  -5  -1  11   92.94    3.62
   5   1 -11   89.81    2.87
   5  -1 -11   90.65    3.27
  -5   1  11   94.44    3.29
   5  -1 -11   90.90    2.85
   5   1 -11   90.90    3.03
  -5  -1  11   91.41    2.99
  -5   1  11   93.15    3.33
   5  -1 -11   91.45    3.15
   5  -1 -10    2.36    0.55
   5   1 -10    2.73    0.53
  -5  -1  10    3.59    0.67
  -5   1  10    2.18    0.48
  -5  -1  10    2.13    0.46
   5   1 -10    2.18    0.63
   5   1 -10    4.57    0.67
  -5   1  10    2.39    0.56
  -5  -1  10    1.58    0.44
   5  -1 -10    2.06    0.42
  -5   1  10    2.25    0.53
  -5  -1   9   42.26    2.23
  -5  -1   9   42.05    1.88
   5  -1  -9   44.33    1.95
   5  -1  -9   43.05    2.11
   5   1  -9   43.21    2.27
   5   1  -9   41.75    1.88
  -5   1   9   43.30    1.95
  -5  -1   9   41.10    1.76
   5   1  -9   42.52    1.81
   5  -1  -9   42.19    1.64
  -5   1   9   44.56    1.99
  -5   1   9   45.34    2.22
  -5  -1   8    4.82    0.67
   5   1  -8    3.68    0.70
   5  -1  -8    3.22    0.58
  -5   1   8    4.42    0.62
   5   1  -8    5.10    0.74
  -5  -1   8    9.39    0.93
   5  -1  -8    3.69    0.62
   5   1  -8    3.69    0.51
  -5   1   8    3.31    0.53
  -5  -1   8    4.28    0.55
  -5   1   8    5.31    0.76
   5   1  -7  521.62    7.14
  -5  -1   7  512.65    7.14
  -5   1   7  505.79    5.72
  -5  -1   7  511.19    6.35
   5  -1  -7  520.51    6.93
   5  -1  -7  521.15    5.70
   5   1  -7  498.35    5.31
  -5   1   7  505.88    5.52
  -5  -1   7  500.48    5.21
  -5   1   7  513.62    7.00
  -5  -1   6  923.81    8.37
   5  -1  -6  899.16    8.83
   5   1  -6  917.86    9.10
  -5   1   6  858.54    6.86
   5  -1  -6  912.04    6.91
  -5  -1   6  887.60    8.95
  -5   1   6  910.52    8.94
   5  -1  -6  860.86    8.60
  -5   1   6  903.63    6.51
  -5  -1   6  915.36    6.51
   5   1  -6  895.04    6.60
   5  -1  -5 1819.80   11.88
   5  -1  -5 1795.49    9.03
  -5  -1   5 1716.14   12.05
  -5   1   5 1738.68    8.90
  -5  -1   5 1801.57   11.54
  -5   1   5 1836.90   12.19
   5  -1  -5 1842.05   12.10
   5   1  -5 1828.84   12.37
   5   1  -5 1793.45   11.19
  -5   1   4  328.82    3.62
  -5   1   4  334.72    5.01
   5  -1  -4  342.67    4.96
   5   1  -4  339.13    5.14
   5  -1  -4  338.66    3.71
  -5   1   4  330.99    5.03
   5  -1  -4  340.96    5.05
  -5  -1   4  343.29    5.17
  -5  -1   4  322.38    3.61
  -5  -1   4  328.65    4.57
   5   1  -4  323.21    4.57
   5  -1  -3  319.20    3.55
  -5  -1   3  310.32    4.80
   5  -1  -3  302.95    4.63
   5  -1  -3  320.84    4.75
  -5   1   3  320.31    4.80
  -5   1   3  318.27    4.63
   5  -1  -3  328.54    4.80
   5   1  -3  322.10    4.94
  -5   1   3  323.32    4.80
  -5  -1   3  320.66    4.43
   5   1  -3  313.08    4.40
  -5   1   2  975.28    8.02
   5  -1  -2  958.66    8.00
   5  -1  -2  942.77    7.60
  -5  -1   2  956.30    5.12
  -5  -1   2  932.48    8.32
  -5   1   2  967.84    7.72
   5  -1  -2  956.78    8.16
   5   1  -2  955.72    8.50
  -5   1   2  929.81    5.52
   5  -1  -2  945.89    5.51
   5   1  -2  958.85    7.62
  -5  -1   2  962.05    7.69
  -5   1   1  198.11    3.54
   5  -1  -1  200.63    3.55
   5   1  -1  201.35    3.94
  -5   1   1  204.69    3.38
   5  -1  -1  193.91    3.33
   5   1  -1  197.44    2.32
  -5  -1   1  195.47    3.54
   5  -1  -1  196.00    2.18
  -5   1   1  192.90    2.92
   5  -1  -1  200.29    2.96
  -5   1   1  188.35    2.11
   5   1  -1  197.65    3.55
  -5   1   1  194.36    2.18
   5  -1  -1  198.13    2.15
  -5  -1   1  194.72    3.55
  -5   1   0 4191.69   15.78
   5  -1   0 4032.42   15.68
  -5   1   0 4191.99   14.67
   5  -1   0 4102.28   14.71
  -5   1   0 4057.85   15.04
   5  -1   0 4134.02   12.19
  -5  -1   0 4135.45   16.98
   5   1   0 4188.03   17.17
   5  -1   0 4180.77   15.18
  -5   1   0 4121.11   12.28
  -5  -1   0 4093.07   16.82
   5   1   0 4147.11   16.91
  -5   1  -1 4689.37   16.29
   5  -1   1 4541.41   18.42
   5  -1   1 4505.12   14.99
  -5   1  -1 4659.87   14.94
  -5   1  -1 4516.80   14.76
   5  -1   1 4572.47   14.92
   5   1   1 4663.12   19.12
   5  -1   1 4740.81   17.93
  -5   1  -1 4640.57   17.68
   5   1   1 4672.80   18.81
  -5   1  -1 4607.86   15.15
  -5  -1  -1 4620.07   18.88
  -5   1  -2 1626.23    9.48
   5  -1   2 1687.68    8.88
   5  -1   2 1669.47   11.12
  -5   1  -2 1631.70    8.69
  -5   1  -2 1619.74   10.01
   5  -1   2 1647.18   11.61
   5   1   2 1652.86   12.00
  -5   1  -2 1647.07   11.47
  -5  -1  -2 1638.95   11.77
   5  -1   2 1662.45   10.12
   5   1   2 1643.45   11.82
  -5   1  -2 1645.61   10.17
  -5  -1  -2 1637.79   11.89
  -5   1  -3  506.90    5.24
   5  -1   3  507.48    6.95
   5  -1   3  516.20    6.26
  -5   1  -3  508.00    4.80
  -5   1  -3  501.65    6.81
   5   1   3  521.97    7.11
  -5   1  -3  504.10    6.16
  -5  -1  -3  504.43    6.98
   5  -1   3  510.63    6.91
   5  -1   3  507.14    6.14
  -5   1  -3  514.44    6.25
   5   1   3  501.16    6.97
  -5  -1  -3  523.40    7.09
   5  -1   4 1785.44   13.78
  -5   1  -4 1727.75    8.87
   5  -1   4 1729.48   11.59
  -5  -1  -4 1719.19   13.46
  -5   1  -4 1704.64   12.35
  -5   1  -4 1731.78   13.44
   5  -1   4 1747.49   13.62
   5   1   4 1749.62   13.65
   5  -1   4 1754.20   12.37
   5   1   4 1752.67   13.62
  -5  -1  -4 1719.77   13.63
  -5   1  -4 1772.28   12.49
   5  -1   5  431.27    7.23
   5  -1   5  428.54    5.88
  -5   1  -5  431.55    4.52
  -5   1  -5  431.23    6.65
  -5  -1  -5  440.34    7.20
   5  -1   5  433.87    7.20
   5   1   5  437.81    7.21
  -5   1  -5  433.17    7.13
   5  -1   5  445.85    6.70
  -5   1  -5  441.19    6.69
  -5  -1  -5  429.56    7.18
   5   1   5  418.07    7.09
   5  -1   6 2005.05   16.47
   5  -1   6 1916.89   12.61
  -5  -1  -6 1942.17   15.99
  -5   1  -6 1966.77   15.04
  -5   1  -6 1930.18   16.01
   5  -1   6 1966.31   16.19
   5  -1   6 1966.56   14.99
   5   1   6 1958.34   15.94
  -5  -1  -6 1959.61   16.17
  -5   1  -6 1992.65   15.08
   5   1   6 1979.19   16.06
   5  -1   7   12.47    1.37
  -5   1  -7   12.51    1.09
   5  -1   7   12.21    1.02
   5   1   7   11.59    0.74
  -5   1  -7   11.29    1.20
   5   1   7   11.59    1.28
  -5  -1  -7   10.91    1.27
   5  -1   7   10.66    1.27
  -5   1  -7   15.27    1.62
   5  -1   7   25.70    1.95
  -5  -1  -7   12.79    1.39
  -5   1  -7   22.40    1.88
   5   1   7   12.21    1.35
   5  -1   8 3833.06   25.14
   5   1   8 3847.91   25.32
  -5   1  -8 3731.40   17.91
[truncated: 1,394,251 more chars]
